# Supplementary material for: Bis-cyclometallated Ir(iii) complexes containing 2-(1H-pyrazol-3-yl)pyridine ligands; influence of substituents and cyclometallating ligands on response to changes in pH
Source: Royal Society of Chemistry journal article supplement (doi:10.1039/d0dt02434a), 2020-01-01

## Supplementary Information for

### **Bis-cyclometallated Ir(III) complexes containing 2-(1*H*-pyrazol-3-yl)pyridine ligands; influence of substituents and cyclometallating ligands on response to changes in pH.**

Noreldin Abdollah,<sup>b</sup> David L. Davies,<sup>\*a</sup> Mark P. Lowe<sup>a</sup> and Kuldip Singh<sup>a</sup>

<sup>a</sup> School of Chemistry, University of Leicester, Leicester LE1 7RH

<sup>b</sup> Current address, Chemistry Department, Faculty of Science, Omar Al-Mukhtar University, Torbruk, Libya.

## Contents

|                                                                                                                                                                                                                                                                                                                              | Pg No |
|------------------------------------------------------------------------------------------------------------------------------------------------------------------------------------------------------------------------------------------------------------------------------------------------------------------------------|-------|
| NMR labelling for Ir complexes                                                                                                                                                                                                                                                                                               | 4     |
| Fig S1 Region of the TOCSY spectrum of <b>2aHL<sub>1</sub></b>                                                                                                                                                                                                                                                               | 4     |
| Fig. S2 NOESY spectrum of <b>2aHL<sub>1</sub></b>                                                                                                                                                                                                                                                                            | 5     |
| Fig. S3 X-ray crystal structure of the cations of <b>2aHL<sub>1</sub></b> and <b>2aHL<sub>3</sub></b> showing                                                                                                                                                                                                                | 6     |
| Table S1: Selected bond lengths (Å) and angles (°) for <b>2aHL<sub>1</sub></b> , <b>2aHL<sub>2</sub></b> , <b>2aHL<sub>3</sub></b> and <b>3aL<sub>2</sub></b> .                                                                                                                                                              | 6     |
| Fig. S4 X-Ray crystal structures for the cations of <b>2cHL<sub>1-2</sub></b> showing 50% ellipsoids. All hydrogen atoms (except NH) have been omitted for clarity.                                                                                                                                                          | 7     |
| Table S2: Selected bond lengths (Å) and angles (°) for <b>2cHL<sub>1</sub></b> , <b>2cHL<sub>2</sub></b> , <b>2cHL<sub>3</sub></b> and <b>3cL<sub>3</sub></b>                                                                                                                                                                | 7     |
| Fig. S5: Absorption spectra of cationic and neutral complexes <b>2aHL<sub>1-3</sub></b> (—) and <b>3aL<sub>1-3</sub></b> (---), respectively, in MeCN at 0.02 mM at room temperature                                                                                                                                         | 8     |
| Fig. S6: Absorption spectra of neutral complexes <b>3aL<sub>1-3</sub></b> (---) and <b>3bL<sub>1-3</sub></b> (...) in MeCN at 0.02 mM at room temperature                                                                                                                                                                    | 8     |
| Fig. S7: Absorption spectra of cationic and neutral complexes <b>2cHL<sub>1-3</sub></b> (—) and <b>3cL<sub>1-3</sub></b> (---), respectively, in MeCN at 0.02 mM at room temperature.                                                                                                                                        | 9     |
| Fig. S8: Absorption spectra of neutral <b>3cL<sub>1-3</sub></b> (---) and <b>3dL<sub>2</sub></b> (....) respectively, in MeCN at 0.02 mM at room temperature                                                                                                                                                                 | 9     |
| Table S3 Electronic absorption spectral data [ $\lambda_{\text{abs}}$ (nm), $\epsilon_{\text{max}}$ ( $\text{L mol}^{-1} \text{cm}^{-1}$ )] of complexes <b>2aHL<sub>1-3</sub></b> , <b>3aL<sub>1-3</sub></b> , <b>3bL<sub>1-3</sub></b> , <b>2cHL<sub>1-3</sub></b> , <b>3cL<sub>1-3</sub></b> and <b>3dL<sub>2</sub></b> . | 10    |
| Table S4 Emission data ( $\lambda_{\text{max}}$ nm) of complexes <b>2a/cHL<sub>1-3</sub></b> , and <b>3a/dL<sub>1-3</sub></b> .                                                                                                                                                                                              | 10    |
| Fig. S9: Excitation spectra of (a) cationic ppz complexes <b>2aHL<sub>1-3</sub></b> , (b) neutral ppz complexes <b>3aL<sub>1-3</sub></b> , and (c) neutral ppz-CF <sub>3</sub> complexes <b>3bL<sub>1-3</sub></b> in MeCN at 0.02 mM                                                                                         | 11    |
| Fig. S10: Excitation spectra of (a) cationic ppy complexes <b>2cHL<sub>1-3</sub></b> , (b) neutral ppy complexes <b>3cL<sub>1-3</sub></b> , and (c) neutral ppy-CF <sub>3</sub> complex <b>3dL<sub>2</sub></b> in MeCN at 0.02 mM                                                                                            | 12    |
| Fig. S11 Normalised emission spectra of neutral complexes <b>3cL<sub>2</sub></b> (---) and <b>3dL<sub>2</sub></b> (....), respectively, in MeCN at 0.02 mM at room temperature in air                                                                                                                                        | 13    |
| Fig S12 Selected emission spectra of complexes <b>3aL<sub>2</sub></b> (0.02mM) at various pH values in MeCN/H <sub>2</sub> O (1:9), in air with excitation at 324 nm. Plot of normalised emission intensity of <b>3aL<sub>2</sub></b> against pH                                                                             | 13    |
| Fig S13 Selected emission spectra of complexes <b>3aL<sub>3</sub></b> (0.02mM) at various pH values in MeCN/H <sub>2</sub> O (1:9), in air with excitation at 324 nm. Plot of normalised emission intensity of <b>3aL<sub>3</sub></b> against pH                                                                             | 13    |
| Fig S14 Selected emission spectra of complexes <b>3bL<sub>1</sub></b> (0.02mM) at various pH values in MeCN/H <sub>2</sub> O (1:9), in air with excitation at 324 nm. Plot of normalised emission intensity of <b>3bL<sub>1</sub></b> against pH                                                                             | 14    |
| Fig S15 Selected emission spectra of complexes <b>3bL<sub>2</sub></b> (0.02mM) at various pH values in MeCN/H <sub>2</sub> O (1:9), in air with excitation at 324 nm. Plot of normalised emission intensity of <b>3bL<sub>2</sub></b> against pH                                                                             | 14    |
| Fig S16 Selected emission spectra of complexes <b>3bL<sub>3</sub></b> (0.02mM) at various pH values in MeCN/H <sub>2</sub> O (1:9), in air with excitation at 324 nm. Plot of normalised emission intensity of <b>3bL<sub>3</sub></b> against pH.                                                                            | 14    |

|                                                                                                                                                                                                                                                   |        |
|---------------------------------------------------------------------------------------------------------------------------------------------------------------------------------------------------------------------------------------------------|--------|
| Fig S17 Selected emission spectra of complexes <b>3cL<sub>2</sub></b> (0.02mM) at various pH values in MeCN/H <sub>2</sub> O (1:9), in air with excitation at 324 nm. Plot of normalised emission intensity of <b>3cL<sub>2</sub></b> against pH  | 15     |
| Fig S18 Selected emission spectra of complexes <b>3cL<sub>3</sub></b> (0.02mM) at various pH values in MeCN/H <sub>2</sub> O (1:9), in air with excitation at 324 nm. Plot of normalised emission intensity of <b>3cL<sub>3</sub></b> against pH  | 15     |
| Fig S19 Selected emission spectra of complexes <b>3dL<sub>2</sub></b> (0.02mM) at various pH values in MeCN/H <sub>2</sub> O (1:9), in air with excitation at 324 nm. Plot of normalised emission intensity of <b>3dL<sub>2</sub></b> against pH. | 15     |
| 1-D and 2-D NMR Spectra of all new complexes                                                                                                                                                                                                      | 16-116 |

NMR labelling for iridium complexes

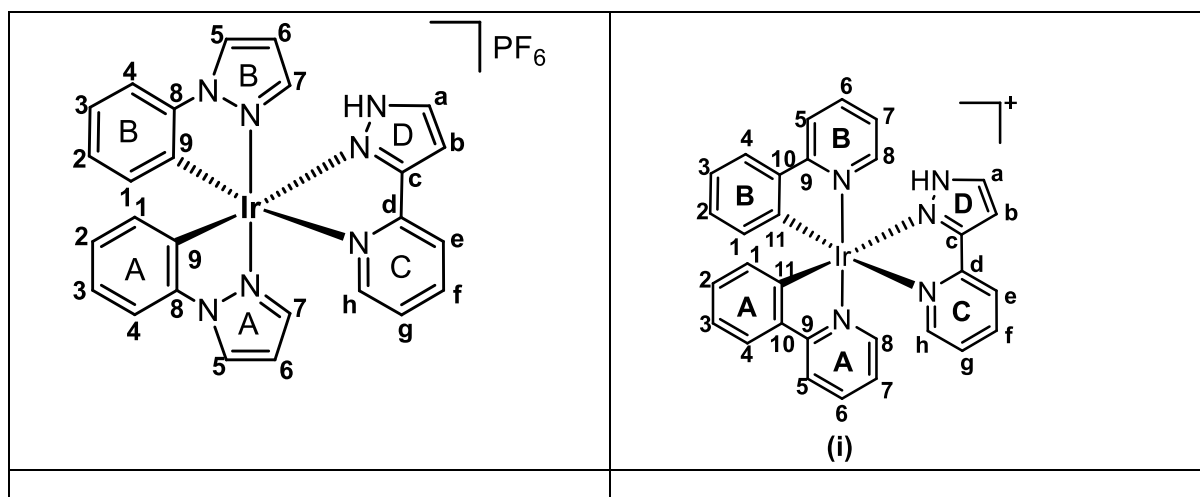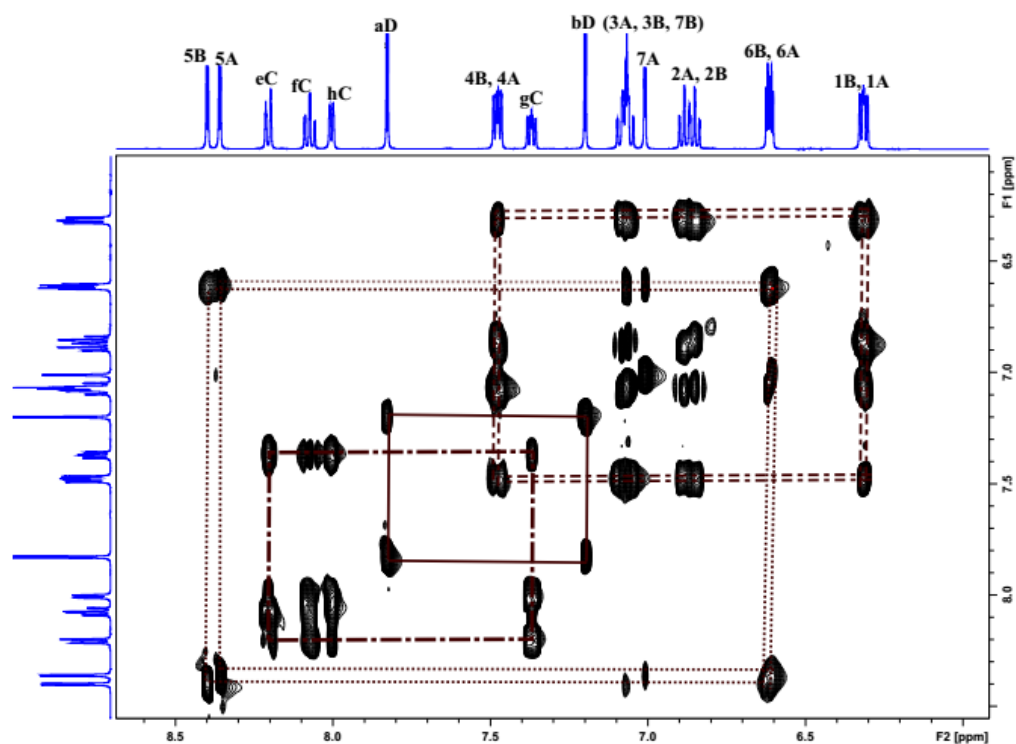

**Fig. S1:** Region of the TOCSY spectrum of **2aHL<sub>1</sub>** showing identification of two cyclometallated phenyls A, B (-----), two pyrazoles A, B (······), one pyridine C (- - - -) and the other pyrazole D (——) ring, (500 MHz, 298 K in CD<sub>3</sub>CN).

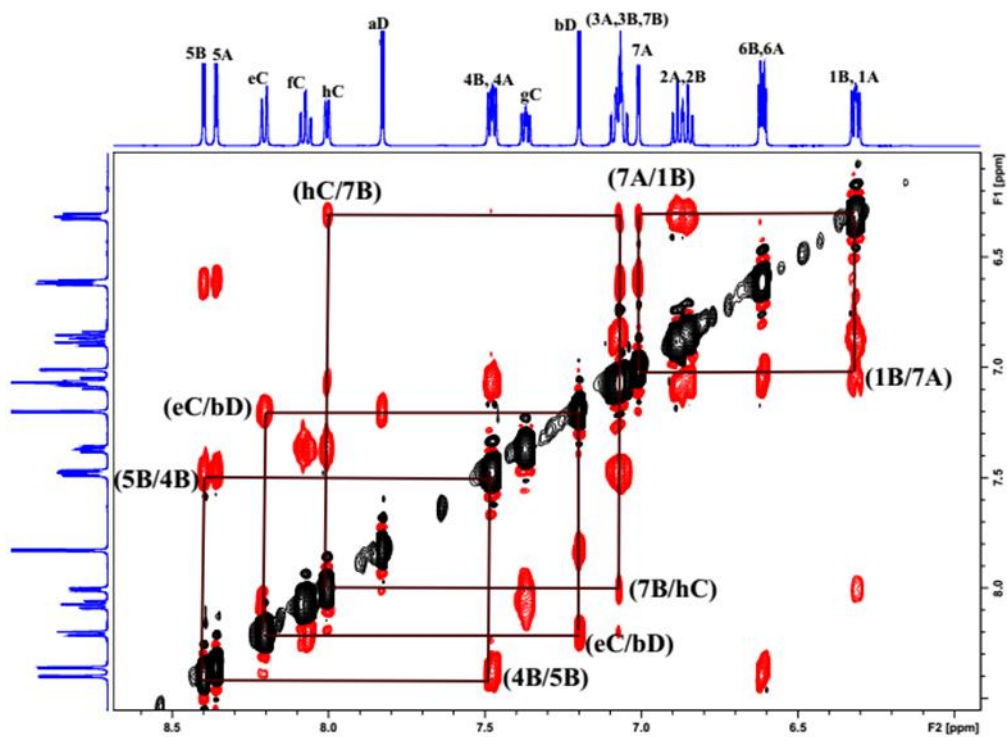

**Fig. S2:** NOESY spectrum of **2aHL<sub>1</sub>** showing some key NOEs (500 MHz, 298 K in CD<sub>3</sub>CN).

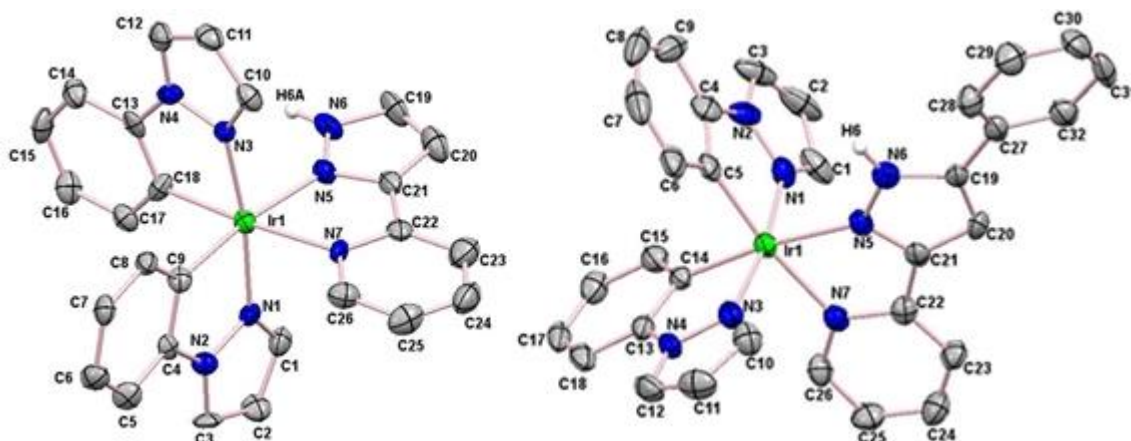

Fig S3 X-ray crystal structure of the cations of **2aHL<sub>1</sub>** and **2aHL<sub>3</sub>** showing 50% ellipsoids, the hydrogens (except NH) have been omitted for clarity.

**Table S1:** Selected bond lengths (Å) and angles (°) for **2aHL<sub>1</sub>**, **2aHL<sub>2</sub>**, **2aHL<sub>3</sub>** and **3aL<sub>2</sub>**.

| (Å)              | <b>2aHL<sub>1</sub></b> | <b>2aHL<sub>2</sub></b> | <b>2aHL<sub>3</sub></b> | <b>3aL<sub>2</sub></b> |
|------------------|-------------------------|-------------------------|-------------------------|------------------------|
| Ir(1)—N(1)       | 2.036(7)                | 2.033(10)               | 2.014(5) <sup>a</sup>   | 2.025(6)               |
| Ir(1)—N(3)       | 2.031(6)                | 2.033(9)                | 2.005(6) <sup>b</sup>   | 2.015(7)               |
| Ir(1)—N(5)       | 2.116(7)                | 2.175(8)                | 2.121(5)                | 2.122(6)               |
| Ir(1)—N(7)       | 2.148(6)                | 2.160(8)                | 2.148(5)                | 2.148(6)               |
| Ir(1)—C(9)       | 2.024(8)                | 1.989(10)               | 2.015(6) <sup>c</sup>   | 2.022(7)               |
| Ir(1)—C(18)      | 2.039(8)                | 2.005(10)               | 2.008(7) <sup>d</sup>   | 1.992(8)               |
| (°)              |                         |                         |                         |                        |
| N(1)—Ir(1)—C(9)  | 80.2(3)                 | 79.8(4)                 | 80.1(2) <sup>e</sup>    | 80.9(3)                |
| N(3)—Ir(1)—C(18) | 80.3(3)                 | 79.6(4)                 | 80.3(3) <sup>f</sup>    | 80.0(3)                |
| N(5)—Ir(1)—N(7)  | 75.1(3)                 | 75.7(3)                 | 75.7(2)                 | 76.8(2)                |

Note the labelling for **2aHL<sub>3</sub>** is different the bond lengths shown are those that correspond to the ones in the other structures the actual labels are <sup>a</sup> labelled Ir(1)—N(3), <sup>b</sup> labelled Ir(1)—N(1), <sup>c</sup> labelled Ir(1)—C(14), <sup>d</sup> labelled Ir(1)—C(5), <sup>e</sup> labelled N(3)—Ir(1)—C(14), and <sup>f</sup> labelled N(1)—Ir(1)—C(5)

Fig. S4 X-Ray crystal structures for the cations of **2cHL**<sub>1-2</sub> showing 50% ellipsoids. All hydrogen atoms (except NH) have been omitted for clarity.

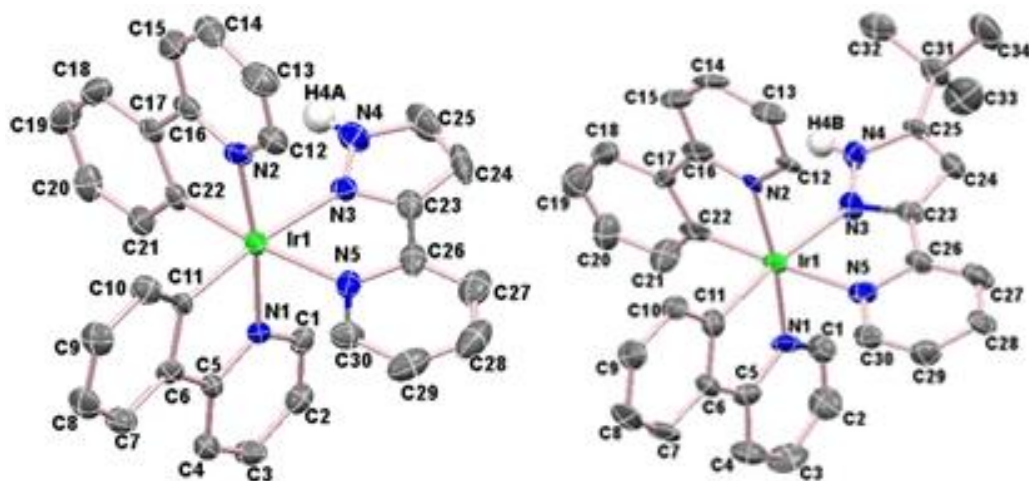

**Table S2:** Selected bond lengths (Å) and angles (°) for **2cHL**<sub>1</sub>, **2cHL**<sub>2</sub><sup>a</sup>, **2cHL**<sub>3</sub> and **3cL**<sub>3</sub>.

| (Å)              | <b>2cHL</b> <sub>1</sub> | <b>2cHL</b> <sub>2</sub> <sup>a</sup> | <b>2cHL</b> <sub>3</sub> | <b>3cL</b> <sub>3</sub> |
|------------------|--------------------------|---------------------------------------|--------------------------|-------------------------|
| Ir(1)—N(1)       | 2.052(5)                 | 2.031(10)                             | 2.056(4)                 | 2.022(7)                |
| Ir(1)—N(2)       | 2.036(5)                 | 2.050(10)                             | 2.062(4)                 | 2.033(7)                |
| Ir(1)—N(3)       | 2.119(5)                 | 2.150(9)                              | 2.149(4)                 | 2.088(7)                |
| Ir(1)—N(5)       | 2.159(6)                 | 2.173(10)                             | 2.170(4)                 | 2.147(8)                |
| Ir(1)—C(11)      | 2.009(6)                 | 2.026(12)                             | 2.014(5)                 | 2.021(10)               |
| Ir(1)—C(22)      | 2.006(7)                 | 2.002(13)                             | 2.010(5)                 | 1.999(9)                |
| (°)              |                          |                                       |                          |                         |
| N(1)—Ir(1)—C(11) | 80.2(2)                  | 80.5(4)                               | 81.0(2)                  | 81.5(4)                 |
| N(2)—Ir(1)—C(22) | 80.5(3)                  | 80.7(4)                               | 81.2(2)                  | 81.6(4)                 |
| N(3)—Ir(1)—N(5)  | 75.1(2)                  | 75.7(4)                               | 74.8(2)                  | 75.6(3)                 |

<sup>a</sup> Average of two independent molecules in the unit cell

Photophysical properties

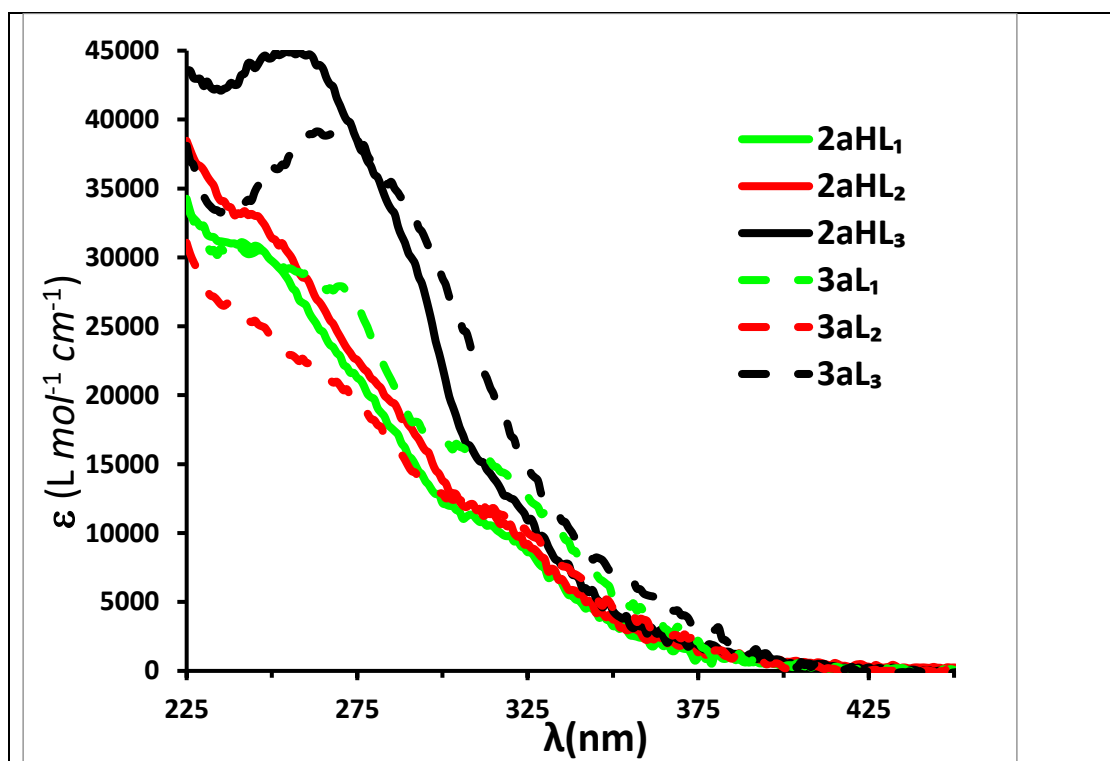

**Fig. S5:** Absorption spectra of cationic and neutral complexes **2aHL**<sub>1-3</sub> (—) and **3aL**<sub>1-3</sub> (---), respectively, in MeCN at 0.02 mM at room temperature.

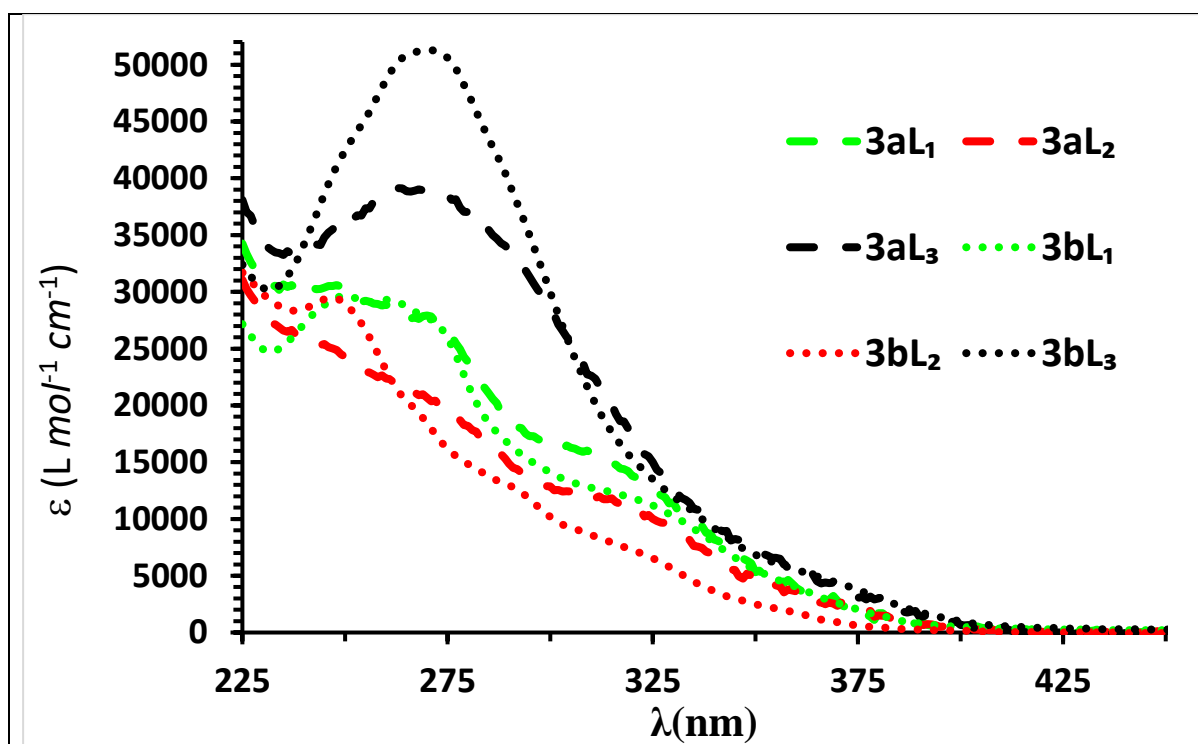

**Fig. S6:** Absorption spectra of neutral complexes **3aL**<sub>1-3</sub> (---) and **3bL**<sub>1-3</sub> (...) in MeCN at 0.02 mM at room temperature



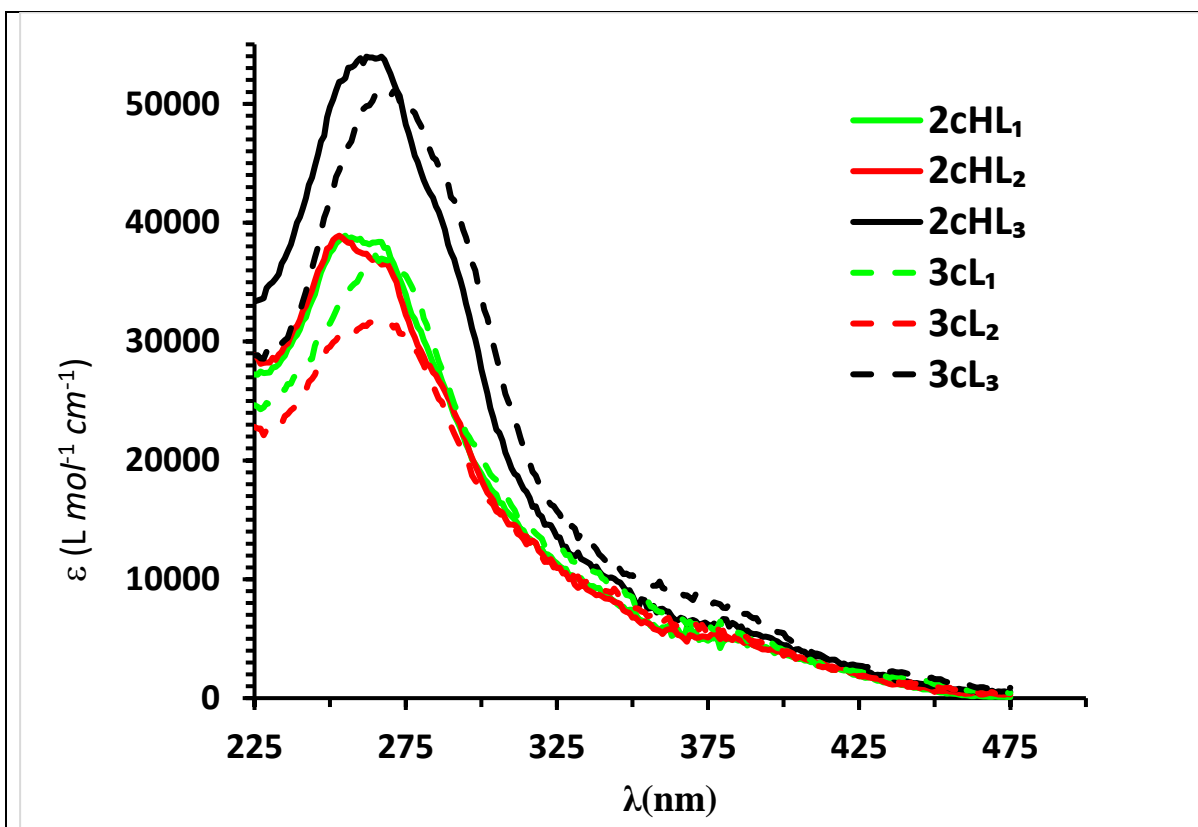

Fig. S7: Absorption spectra of cationic and neutral complexes  $2\text{cHL}_{1-3}$  (—) and  $3\text{cL}_{1-3}$  (---), respectively, in MeCN at 0.02 mM at room temperature.

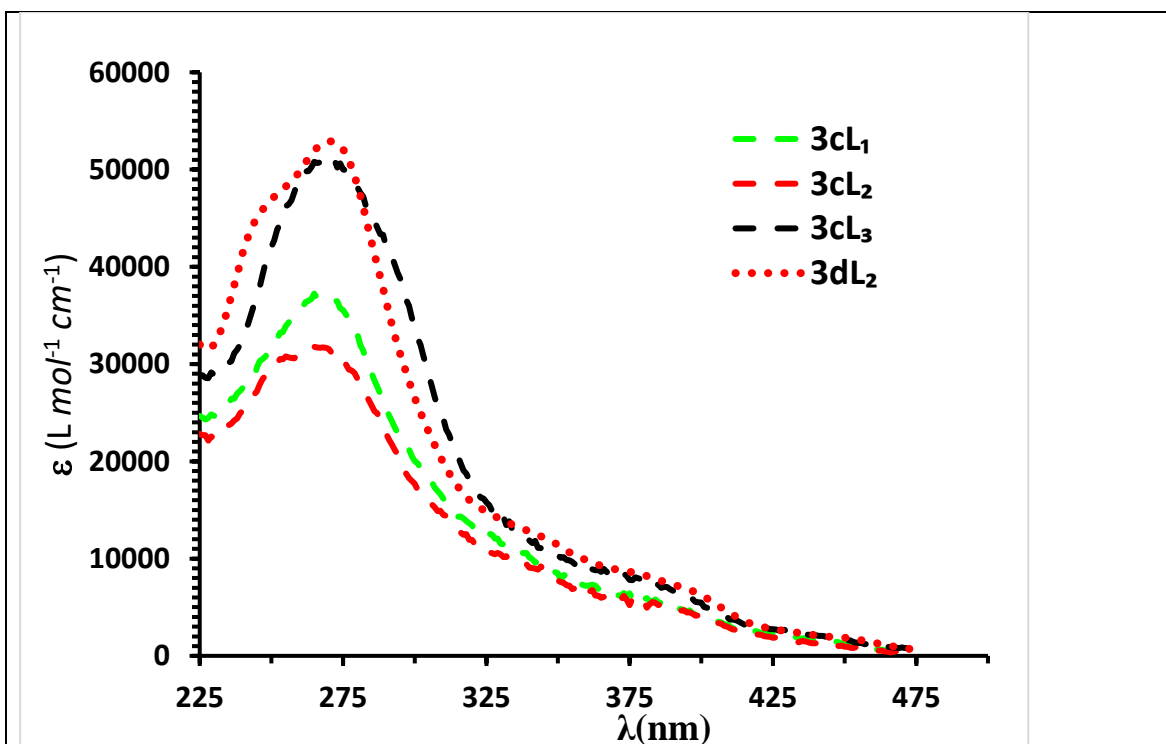

Fig. S8: Absorption spectra of neutral  $3\text{cL}_{1-3}$  (---) and  $3\text{dL}_2$  (...) respectively, in MeCN at 0.02 mM at room temperature

Table S3 Electronic absorption spectral data [ $\lambda_{\text{abs}}$  (nm),  $\epsilon_{\text{max}}$  ( $\text{L mol}^{-1} \text{cm}^{-1}$ )] of complexes **2aHL**<sub>1-3</sub>, **3aL**<sub>1-3</sub>, **3bL**<sub>1-3</sub>, **2cHL**<sub>1-3</sub>, **3cL**<sub>1-3</sub> and **3dL**<sub>2</sub>.

|           | L <sub>1</sub>            | L <sub>2</sub>               | L <sub>3</sub>               |
|-----------|---------------------------|------------------------------|------------------------------|
| <b>2a</b> | 241(31100), 324(8900)     | 242(33400), 321(10000)       | 254(44900) 320(12500)        |
| <b>3a</b> | 270 sh(27900), 324(13100) | 270 sh(27900),<br>321(10800) | 268(39100) 320(17100)        |
| <b>3b</b> | 250(29700), 324(11400)    | 249(29300), 328(6000)        | 270(51300), 367(4700)        |
| <b>2c</b> | 255(38900), 340 sh (8870) | 253(38900), 341 sh<br>(8370) | 267(54000), 368 sh<br>(6240) |
| <b>3c</b> | 267(37000), 340sh(10100)  | 265(31800), 341sh<br>(9030)  | 271(51100), 368 sh<br>(8650) |
| <b>3d</b> |                           | 273(52700), 399 sh<br>(6400) |                              |
|           |                           |                              |                              |

Table S4 Emission data ( $\lambda_{\text{max}}$  nm) of complexes **2a/cHL**<sub>1-3</sub>, and **3a/dL**<sub>1-3</sub>.

|           | L <sub>1</sub> | L <sub>2</sub> | L <sub>3</sub> |
|-----------|----------------|----------------|----------------|
| <b>2a</b> | 502            | 495            | 508            |
| <b>3a</b> | 475            | 493            | 496            |
| <b>3b</b> | 445 sh, 467    | 433sh, 458     | 483            |
| <b>2c</b> | 505            | 484sh, 510     | 497, 520sh     |
| <b>3c</b> | 499, 517sh     | 506            | 497, 518sh     |
| <b>3d</b> |                | 502, 533sh     |                |
|           |                |                |                |

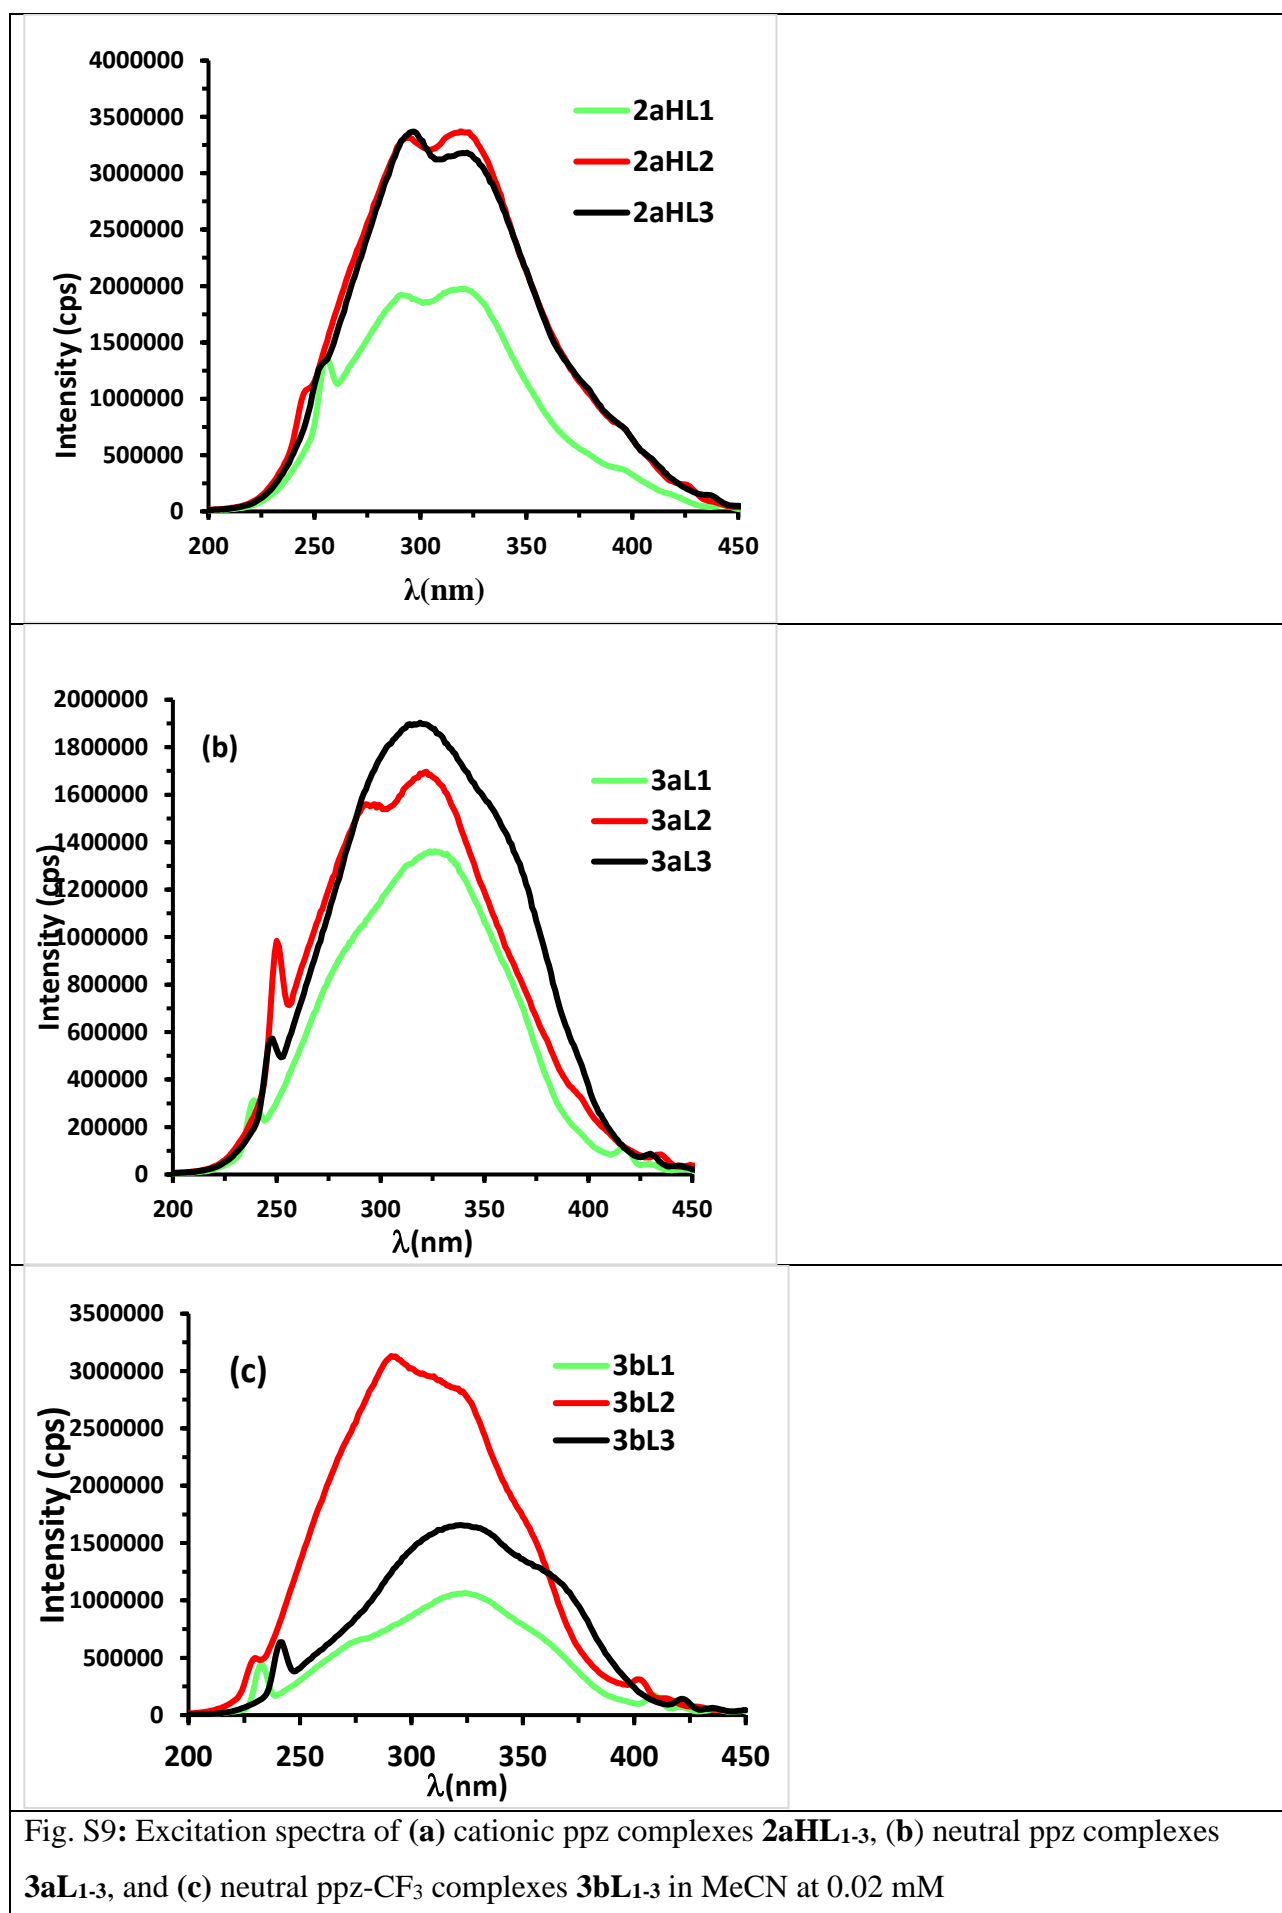

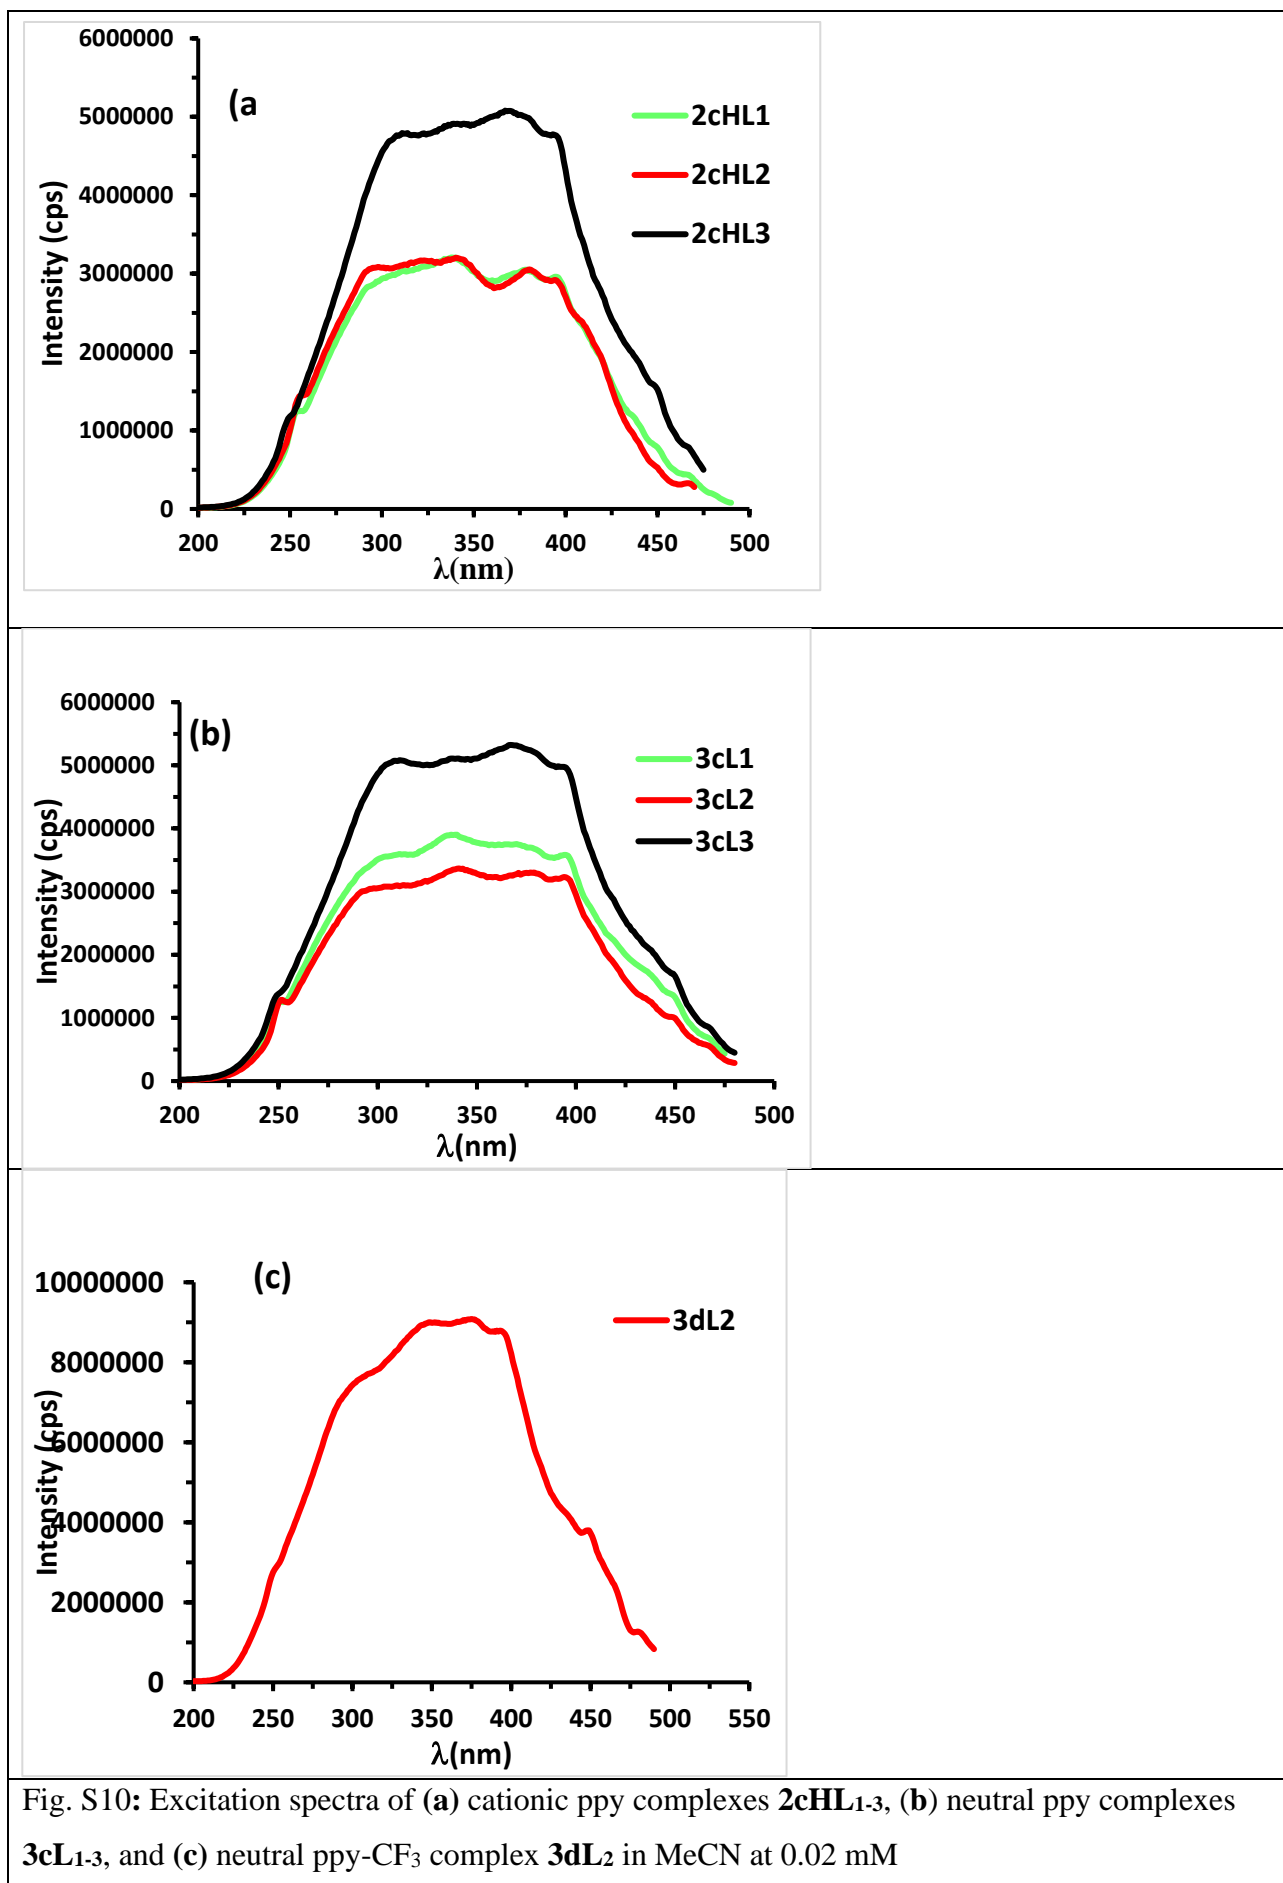

Fig. S10: Excitation spectra of (a) cationic ppy complexes **2cHL**<sub>1-3</sub>, (b) neutral ppy complexes **3cL**<sub>1-3</sub>, and (c) neutral ppy-CF<sub>3</sub> complex **3dL**<sub>2</sub> in MeCN at 0.02 mM

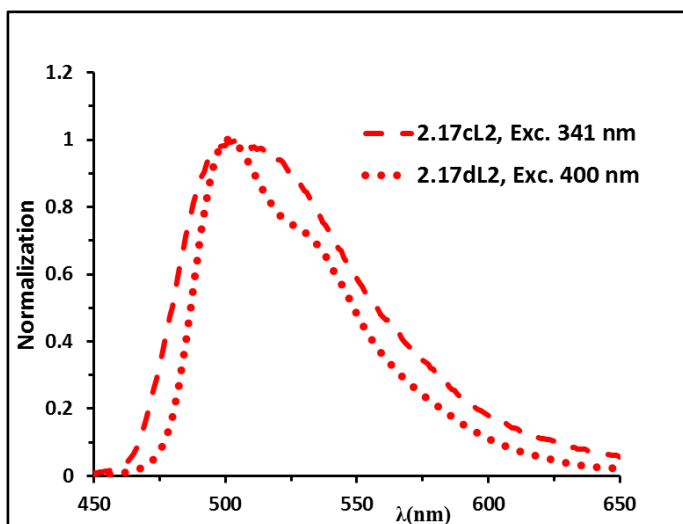

Fig. S11 Normalised emission spectra of neutral complexes **3cL<sub>2</sub>** (---) and **3dL<sub>2</sub>** (....), respectively, in MeCN at 0.02 mM at room temperature in air.

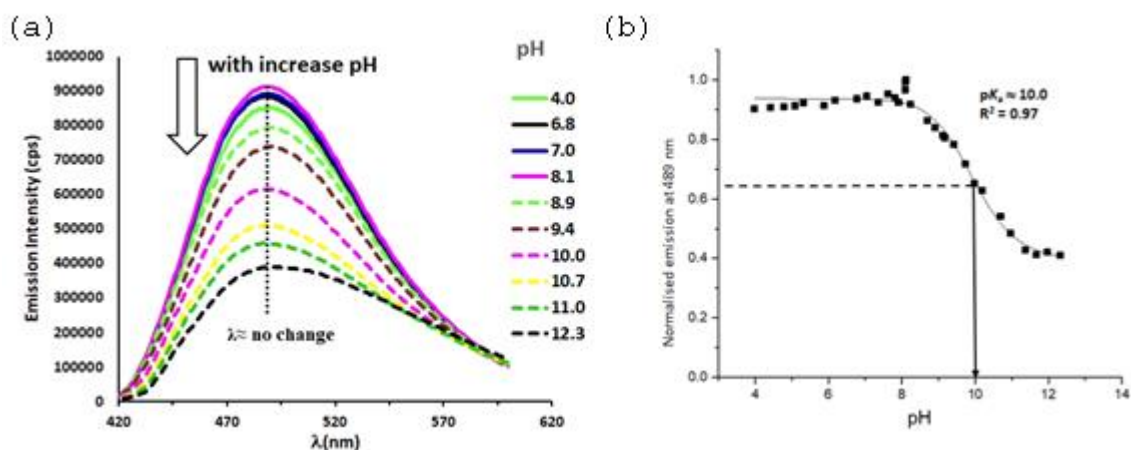

Fig S12 (a) Selected emission spectra of complexes **3aL<sub>2</sub>** (0.02mM) at various pH values in MeCN/H<sub>2</sub>O (1:9), in air with excitation at 324 nm; (b) Plot of normalised emission intensity of **3aL<sub>2</sub>** against pH

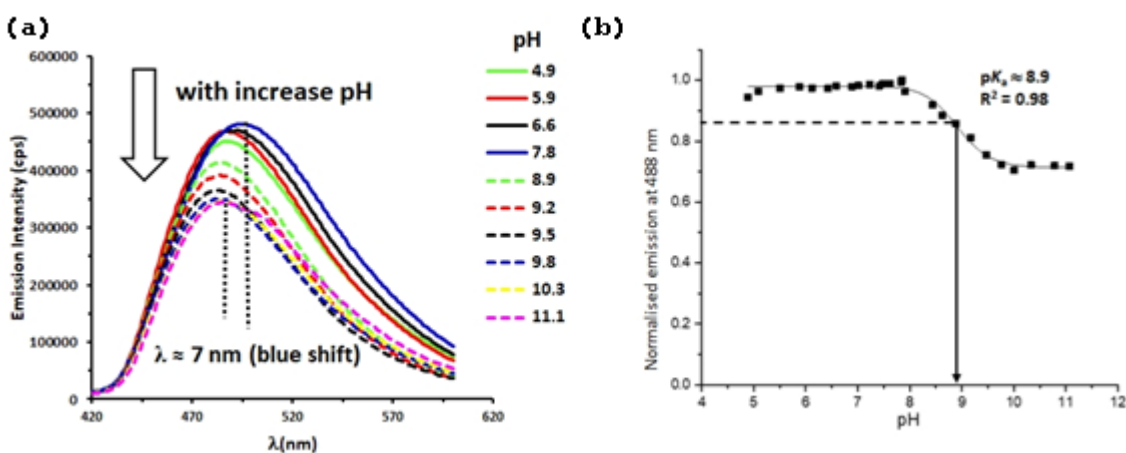

Fig S13 (a) Selected emission spectra of complexes **3aL<sub>3</sub>** (0.02mM) at various pH values in MeCN/H<sub>2</sub>O (1:9), in air with excitation at 324 nm; (b) Plot of normalised emission intensity of **3aL<sub>3</sub>** against pH

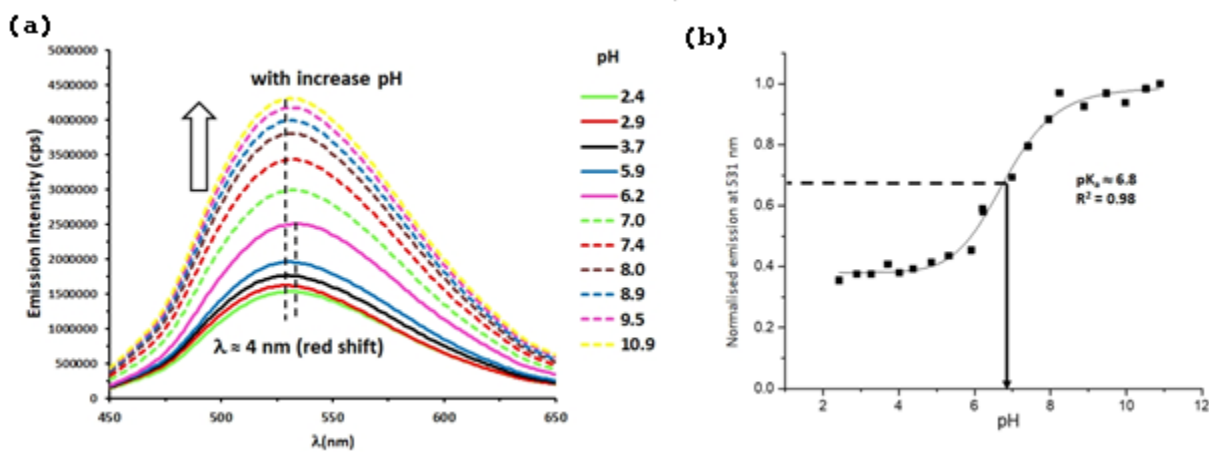

Fig S12 (a) Selected emission spectra of complexes **3bL<sub>1</sub>** (0.02mM) at various pH values in MeCN/H<sub>2</sub>O (1:9), in air with excitation at 324 nm; (b) Plot of normalised emission intensity of **3bL<sub>1</sub>** against pH

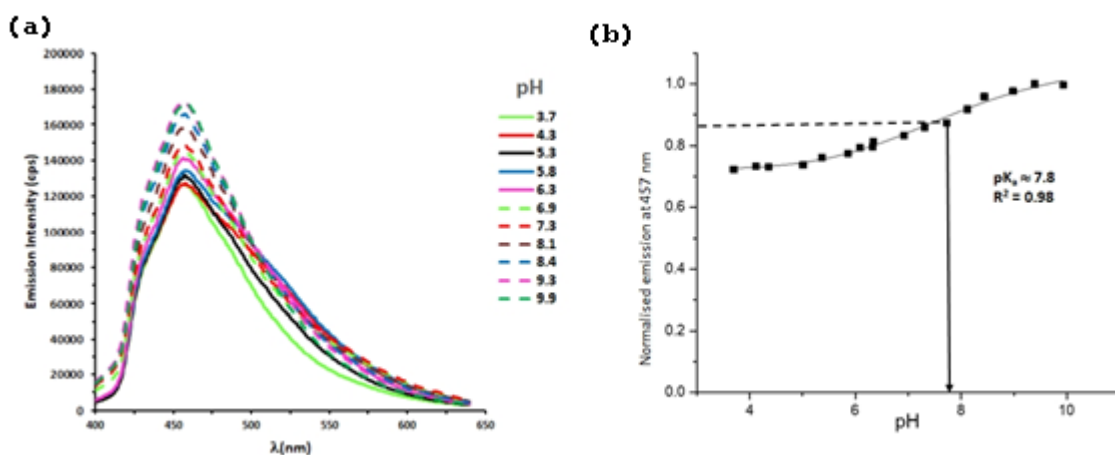

Fig S15 (a) Selected emission spectra of complexes **3bL<sub>2</sub>** (0.02mM) at various pH values in MeCN/H<sub>2</sub>O (1:9), in air with excitation at 324 nm. (b) Plot of normalised emission intensity of **3bL<sub>2</sub>** against pH

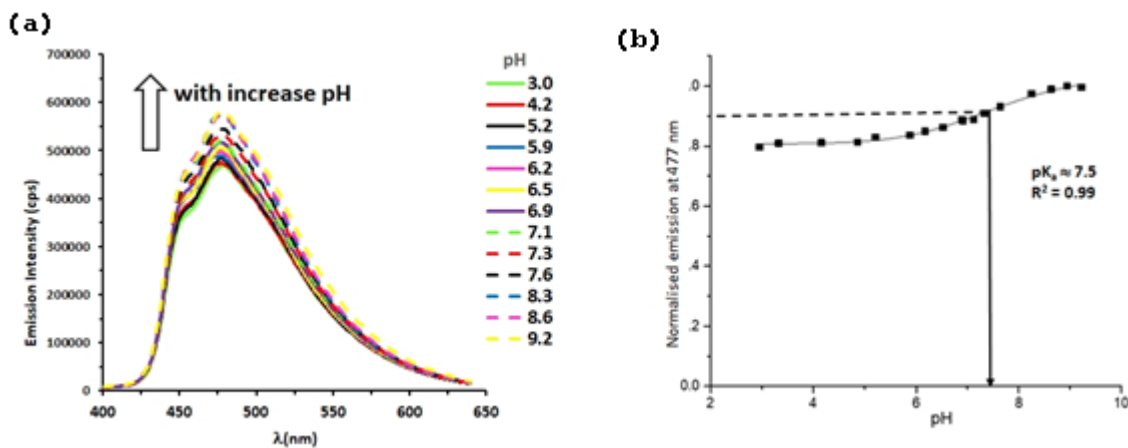

Fig S16 (a) Selected emission spectra of complexes **3bL<sub>3</sub>** (0.02mM) at various pH values in MeCN/H<sub>2</sub>O (1:9), in air with excitation at 324 nm. (b) Plot of normalised emission intensity of **3bL<sub>3</sub>** against pH.

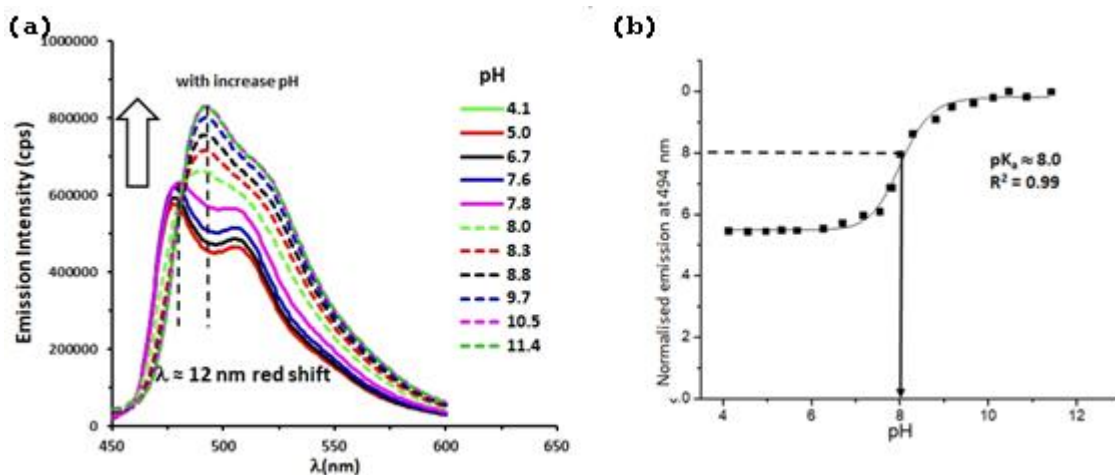

Fig S17 (a) Selected emission spectra of complexes **3cL2** (0.02mM) at various pH values in MeCN/H<sub>2</sub>O (1:9), in air with excitation at 324 nm. (b) Plot of normalised emission intensity of **3cL2** against pH

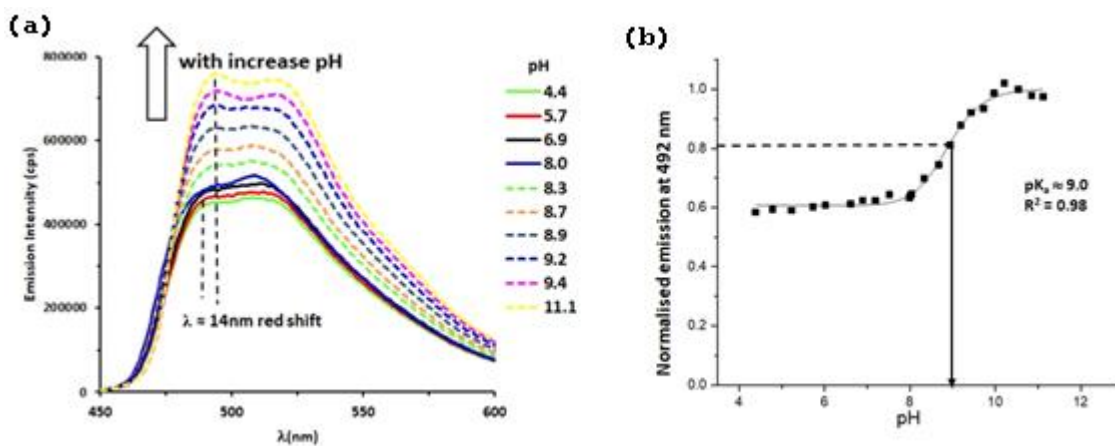

Fig S18 (a) Selected emission spectra of complexes **3cL3** (0.02mM) at various pH values in MeCN/H<sub>2</sub>O (1:9), in air with excitation at 324 nm. (b) Plot of normalised emission intensity of **3cL3** against pH

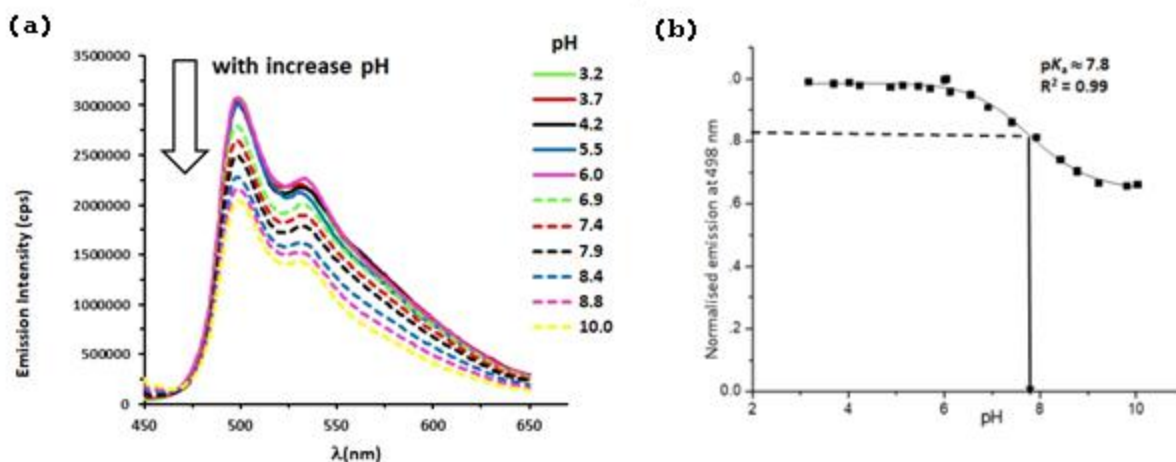

Fig S19 (a) Selected emission spectra of complexes **3dL2** (0.02mM) at various pH values in MeCN/H<sub>2</sub>O (1:9), in air with excitation at 324 nm. (b) Plot of normalised emission intensity of **3dL2** against pH.

$^1\text{H}$  NMR spectrum of **2aHL<sub>1</sub>**

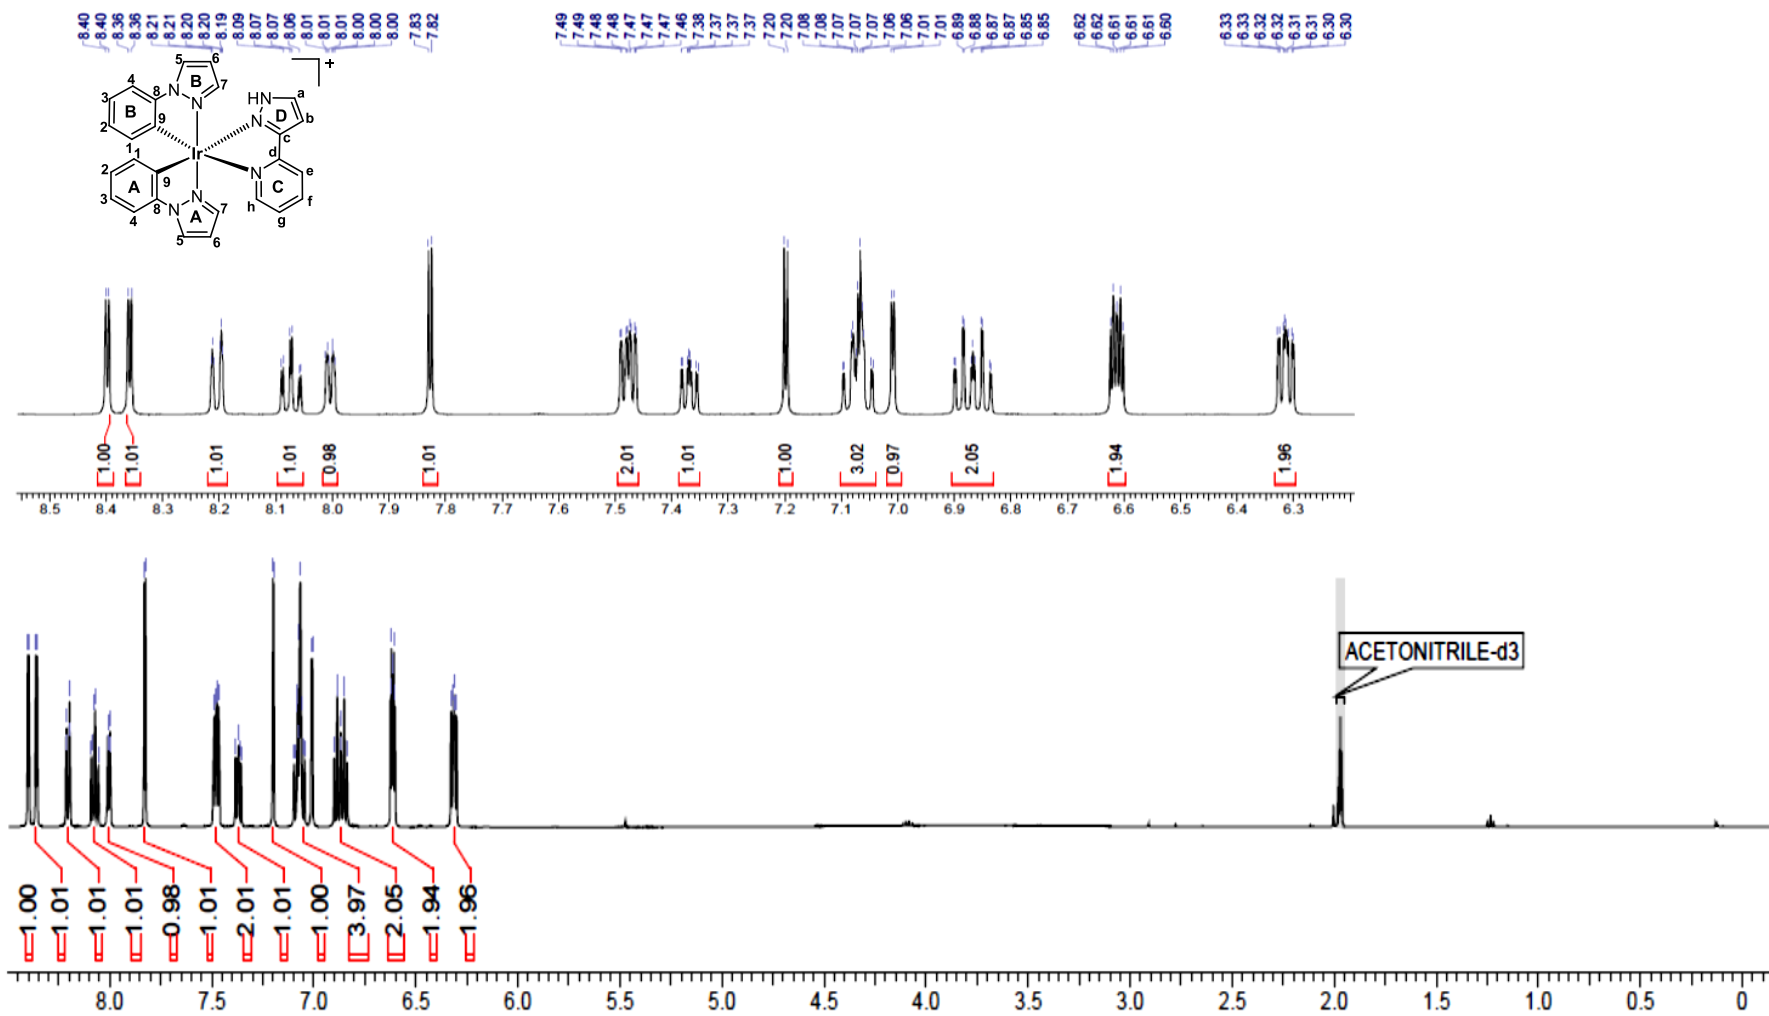



<sup>13</sup>C NMR APT spectrum of 2aHL<sub>1</sub>

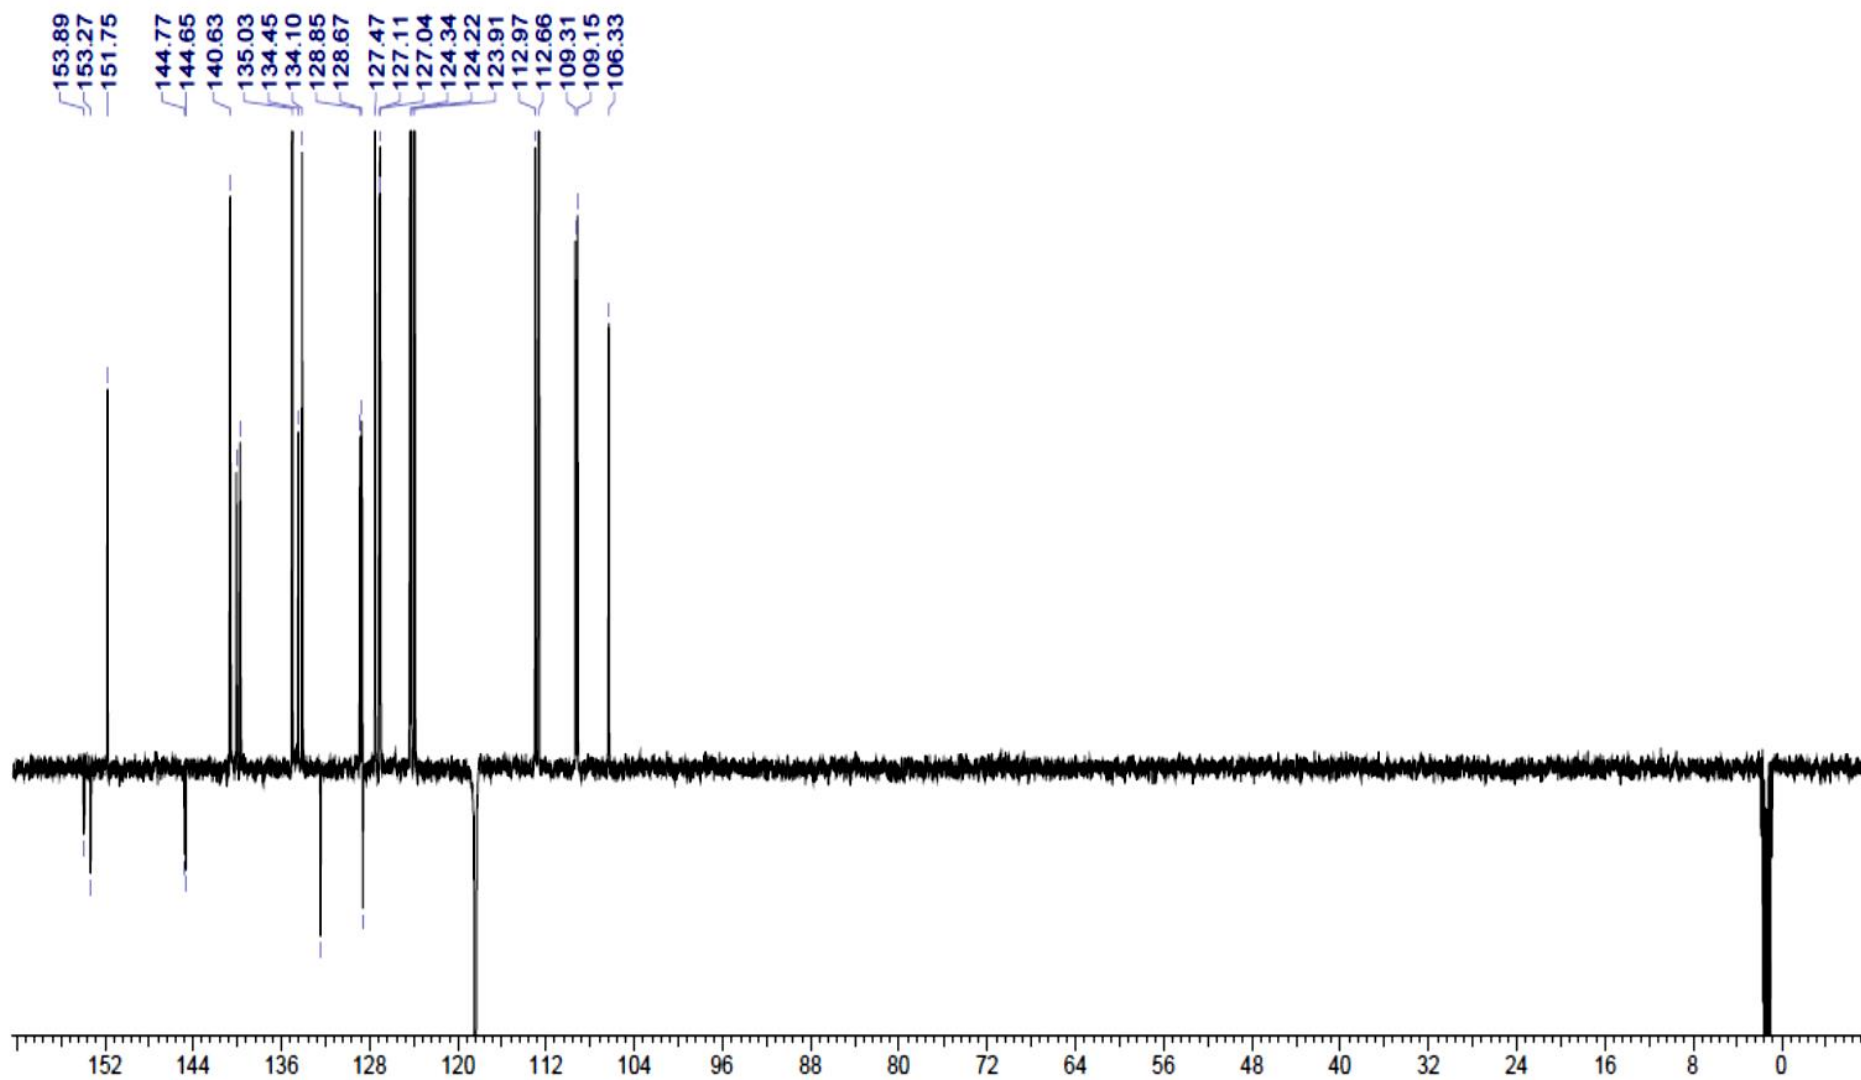

Section of the  $^{13}\text{C}$  APT spectrum of **2aHL<sub>1</sub>**

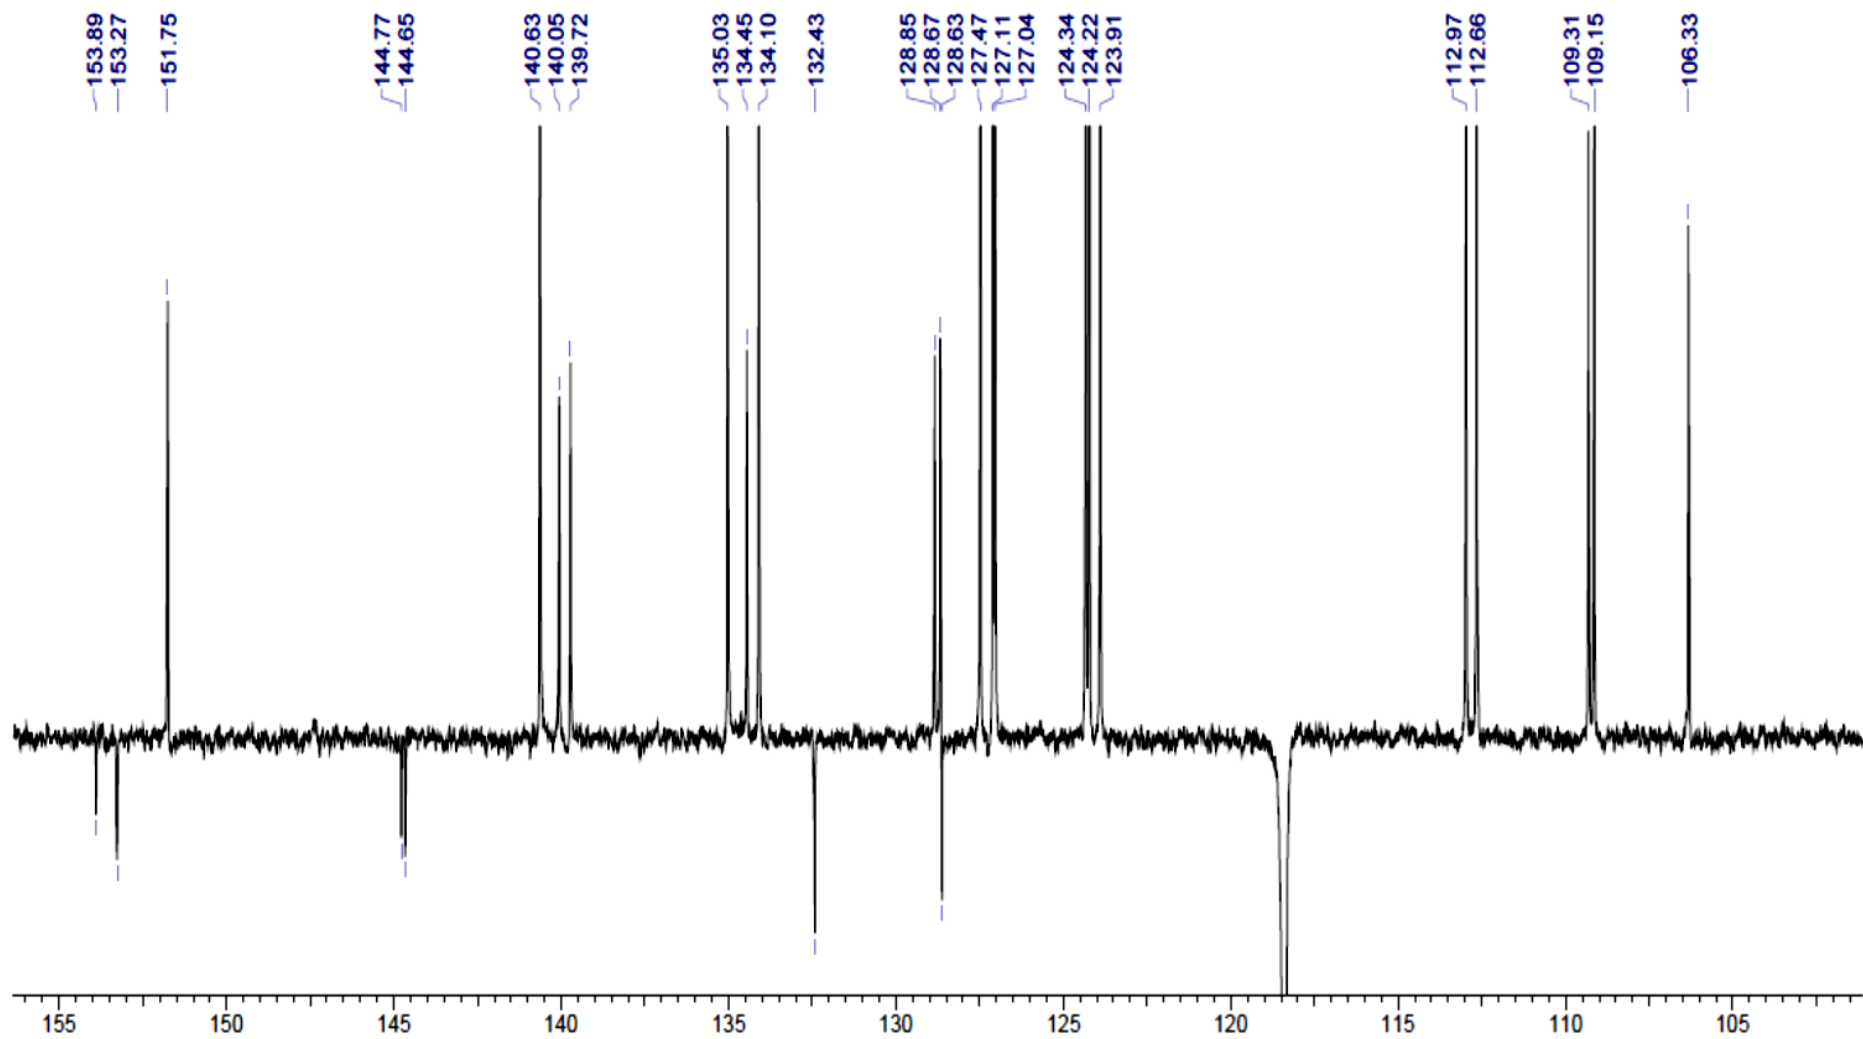

Section of the TOCSY spectrum of **2aHL<sub>1</sub>**

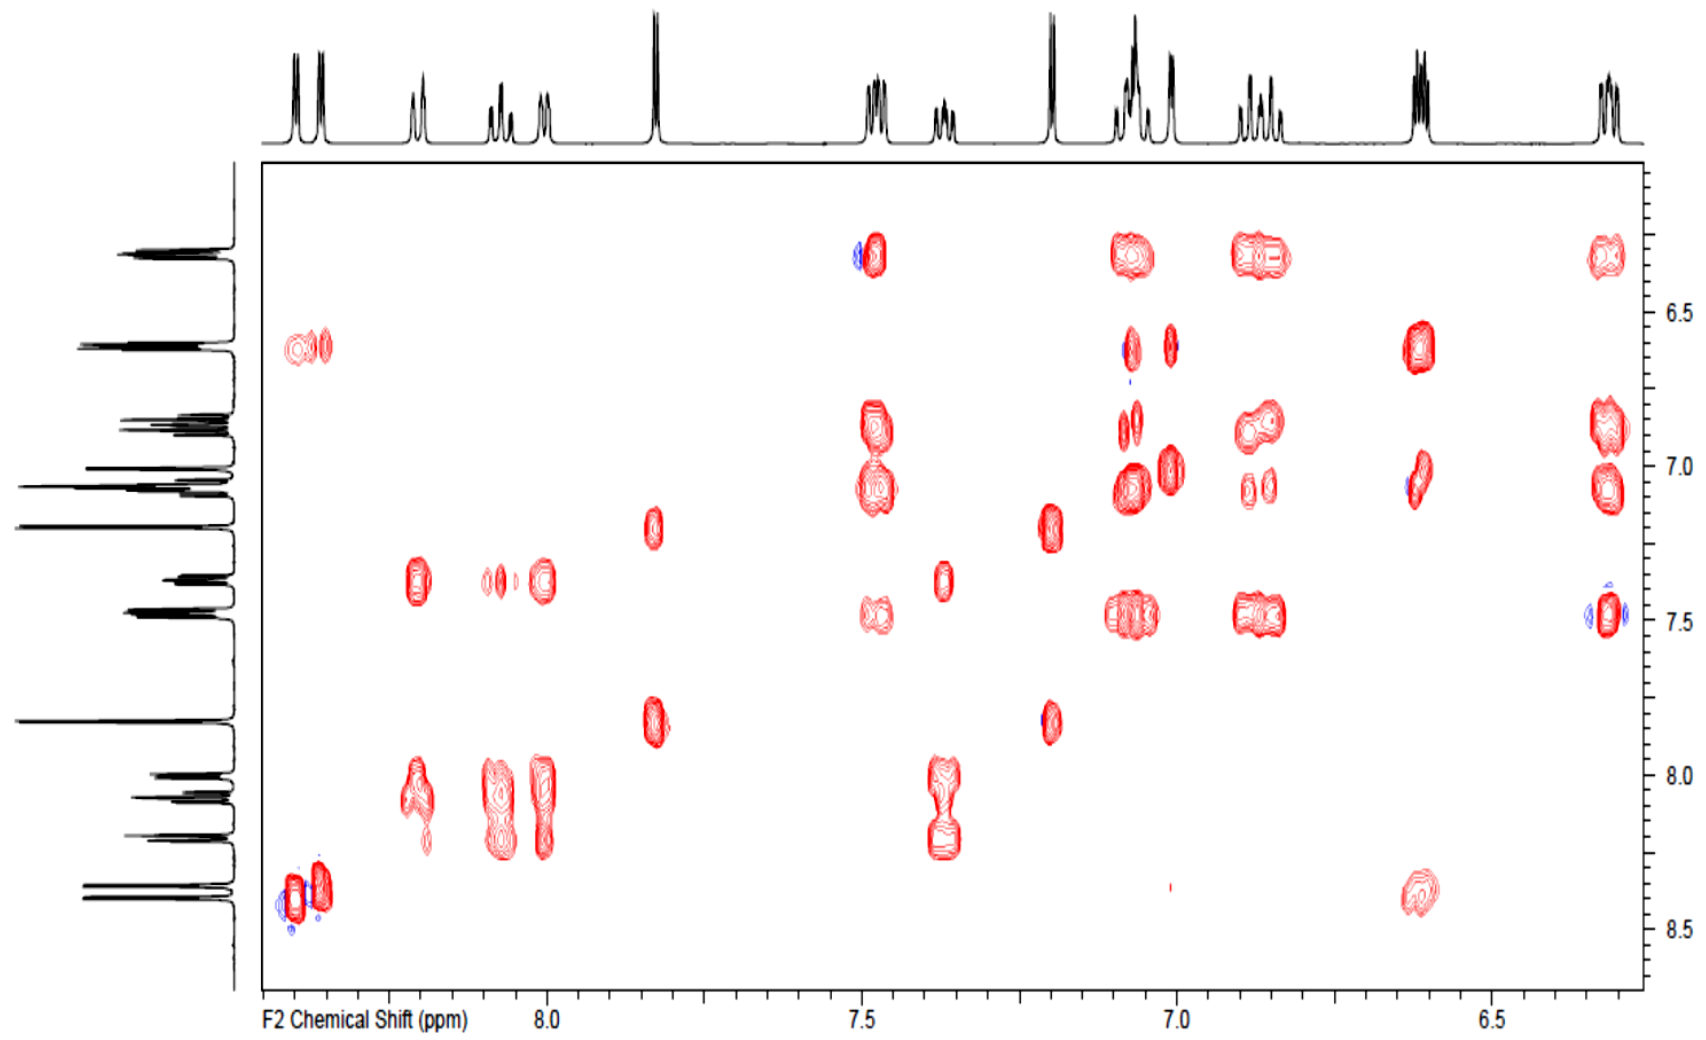

Section of the COSY spectrum of **2aHL<sub>1</sub>**

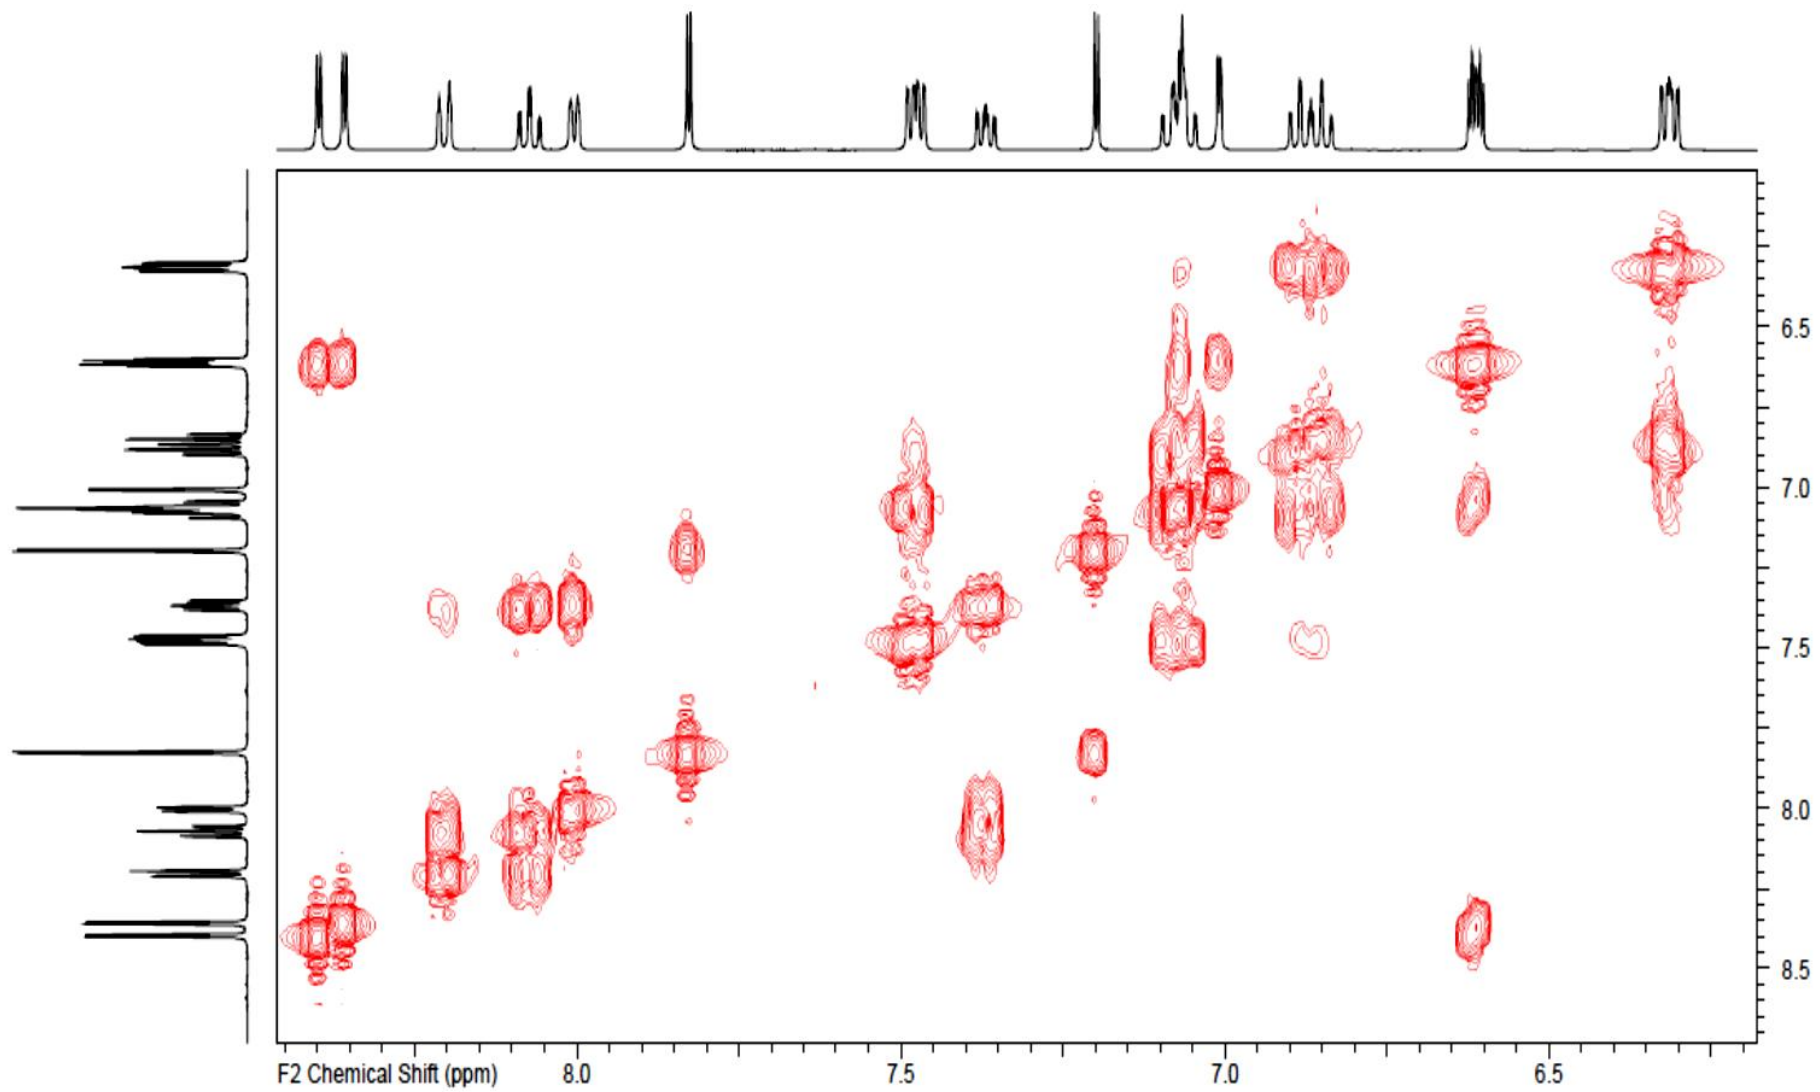

Section of the NOESY spectrum of **2aHL<sub>1</sub>**

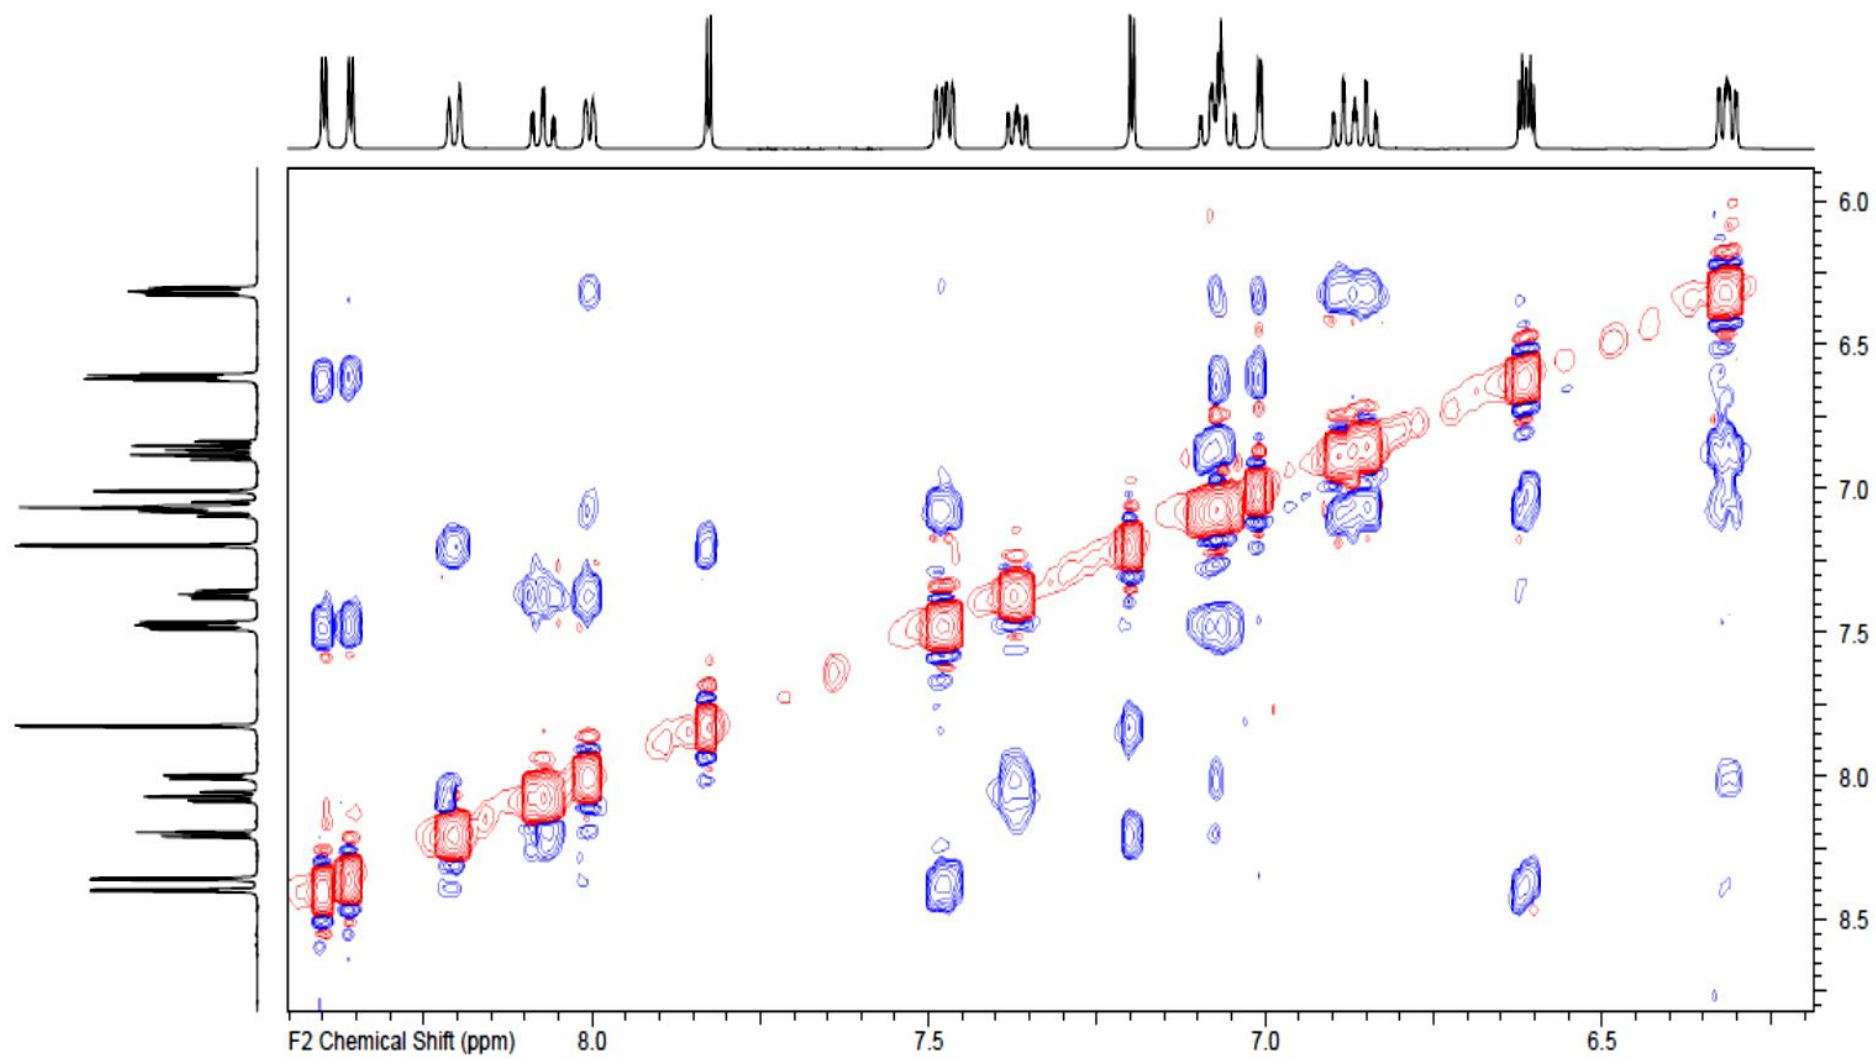

$^1\text{H}$  NMR spectrum of **2aHL<sub>2</sub>**

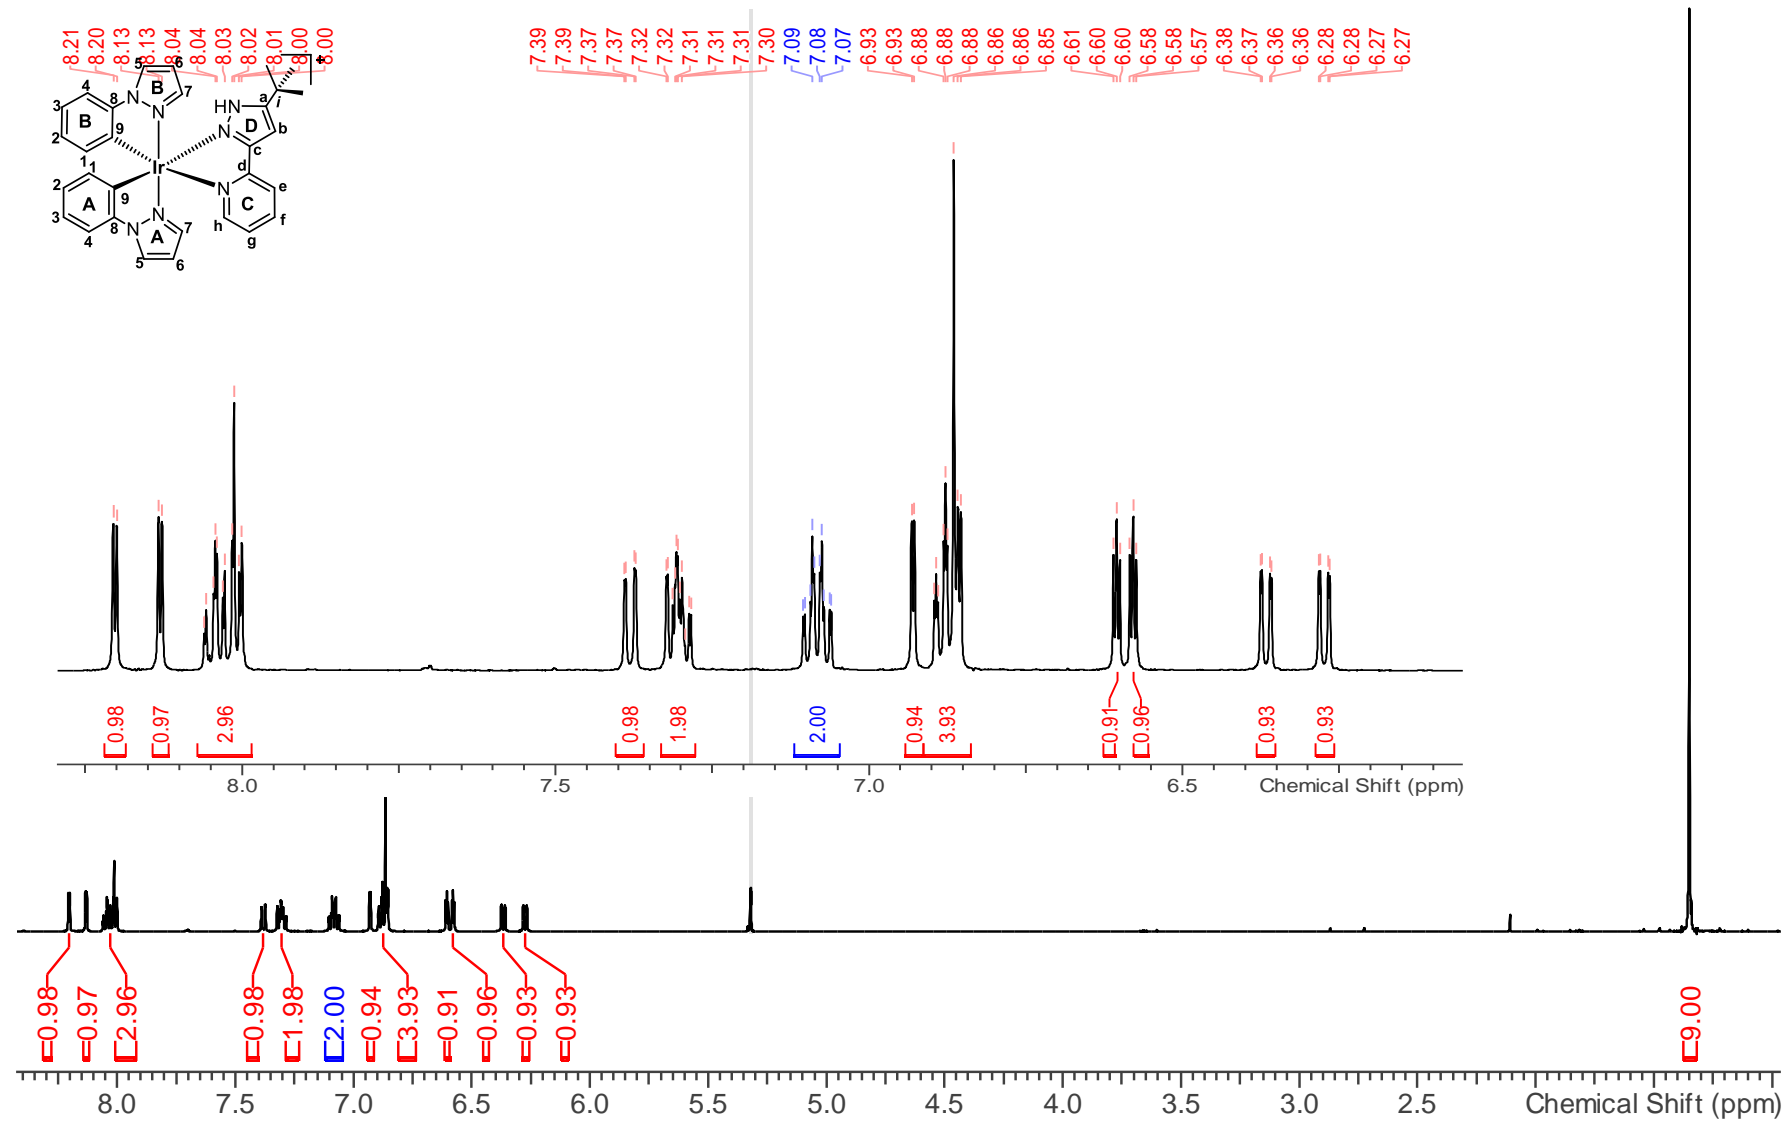

$^{13}\text{C}$  NMR APT spectrum of **2aHL<sub>2</sub>**

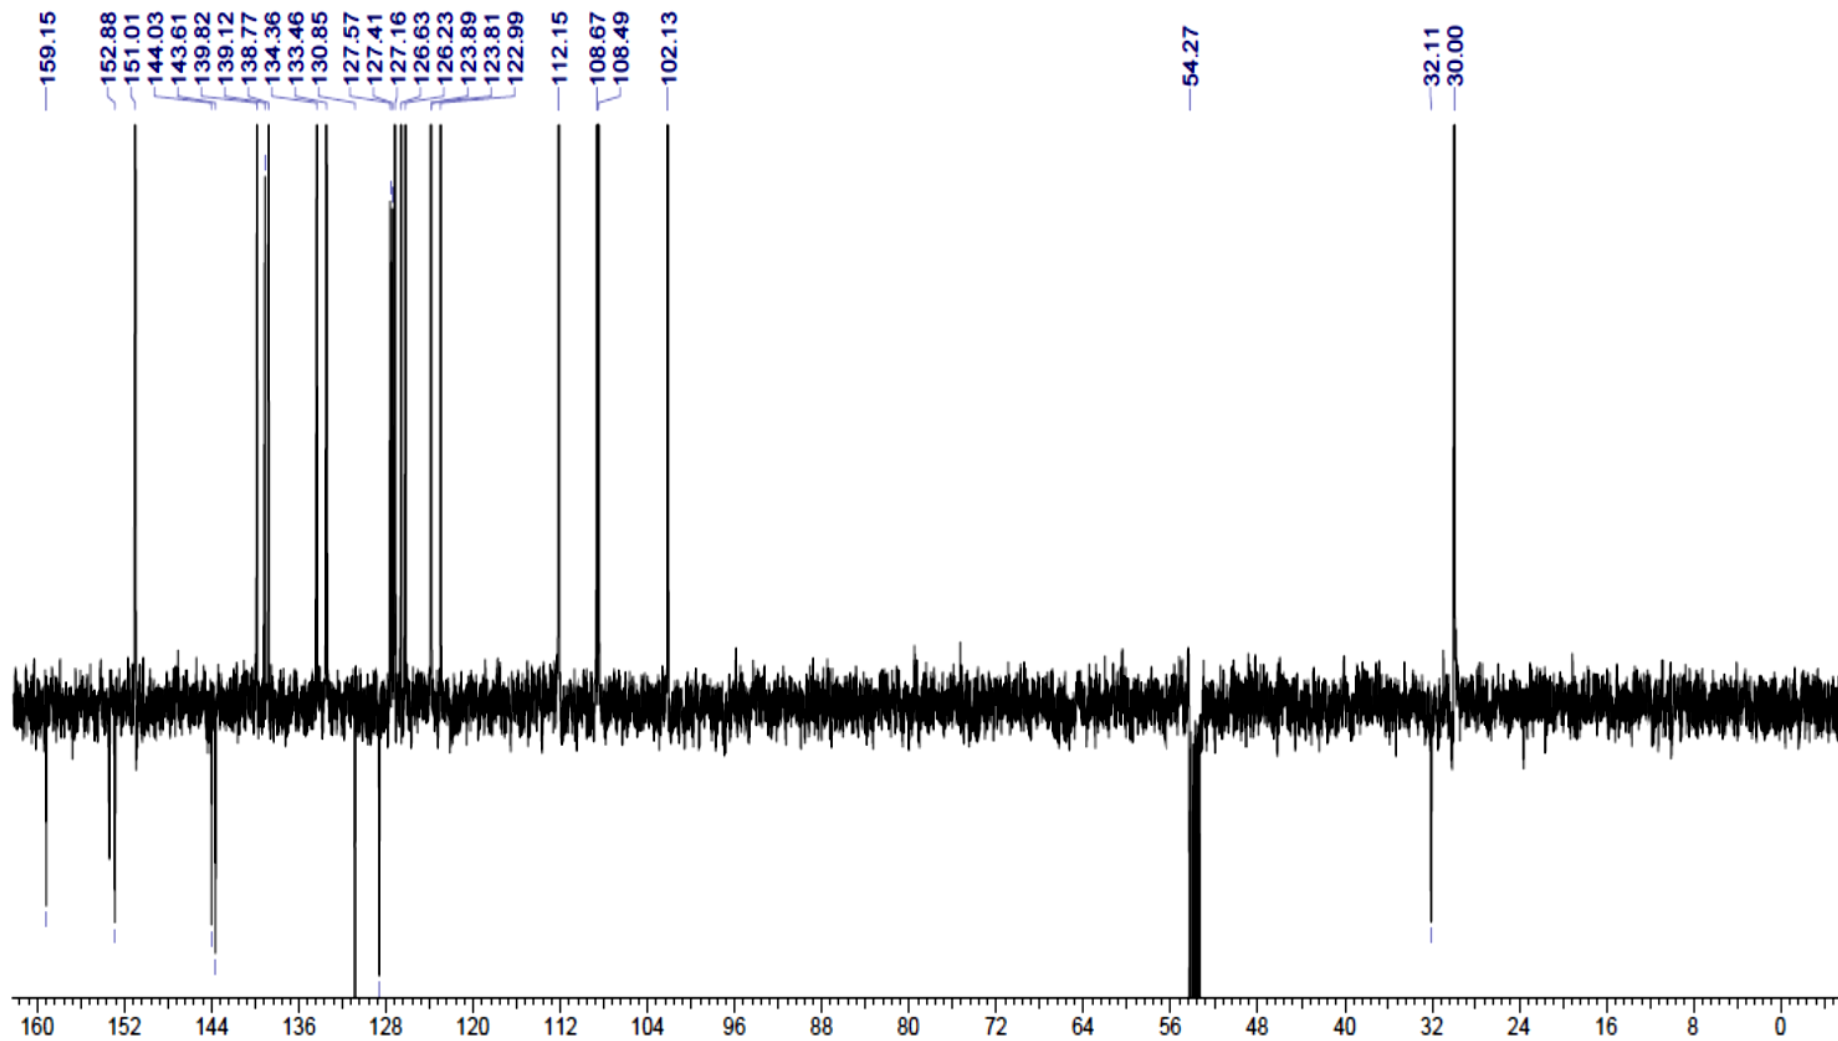

Section of  $^{13}\text{C}$  APT spectrum of **2aHL<sub>2</sub>**

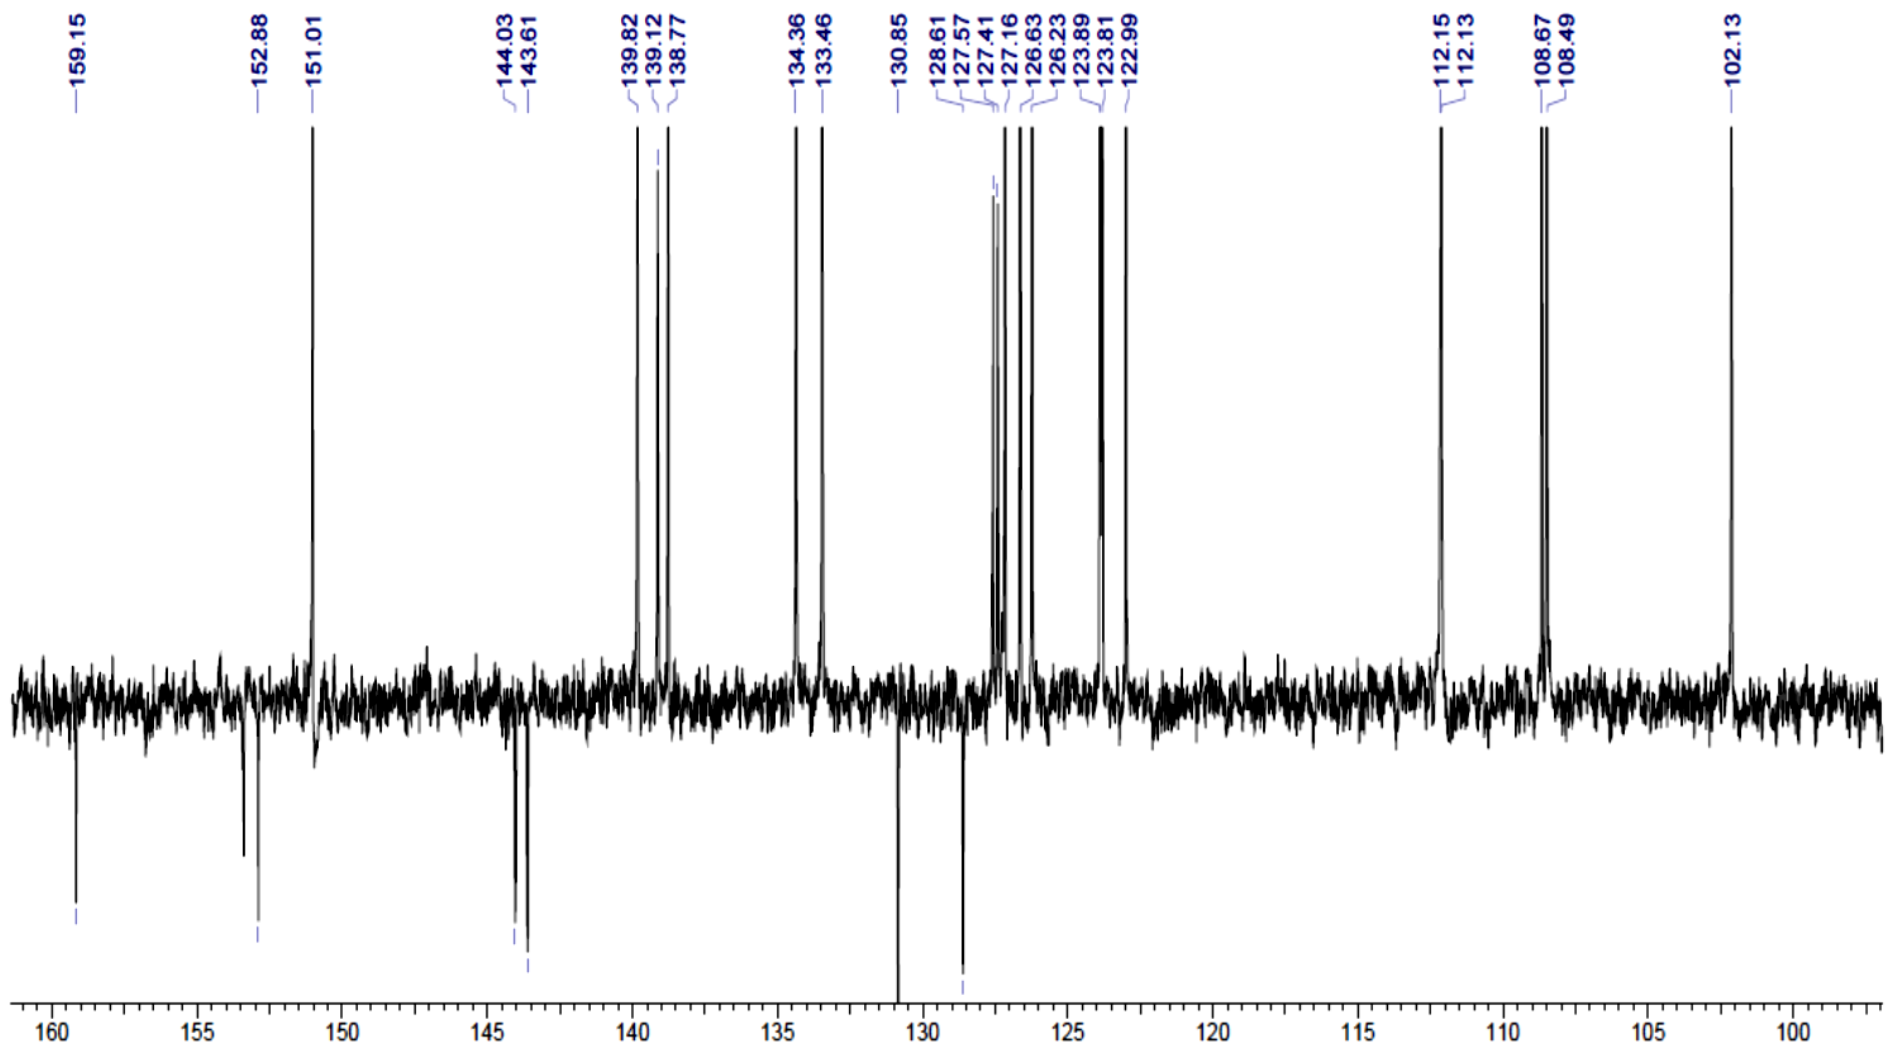



Section of the TOCSY spectrum of **2aHL<sub>2</sub>**

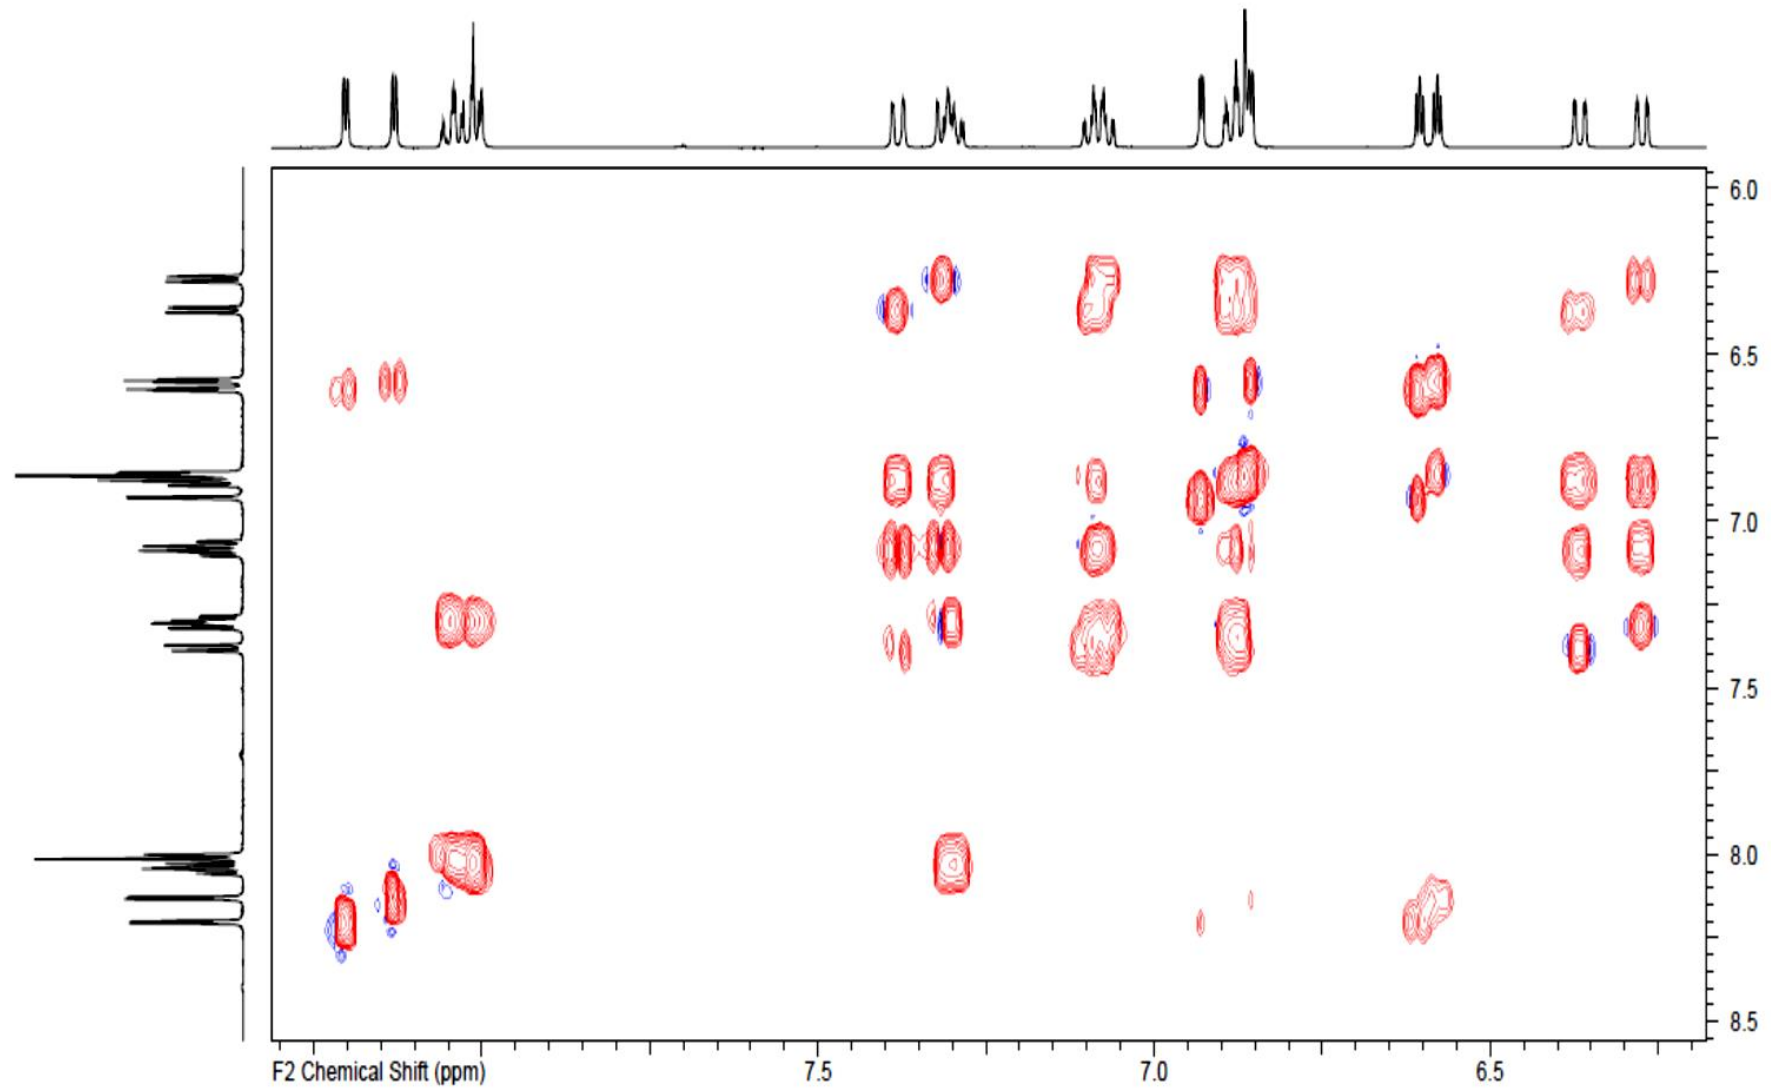

Section of the COSY spectrum of **2aHL<sub>2</sub>**

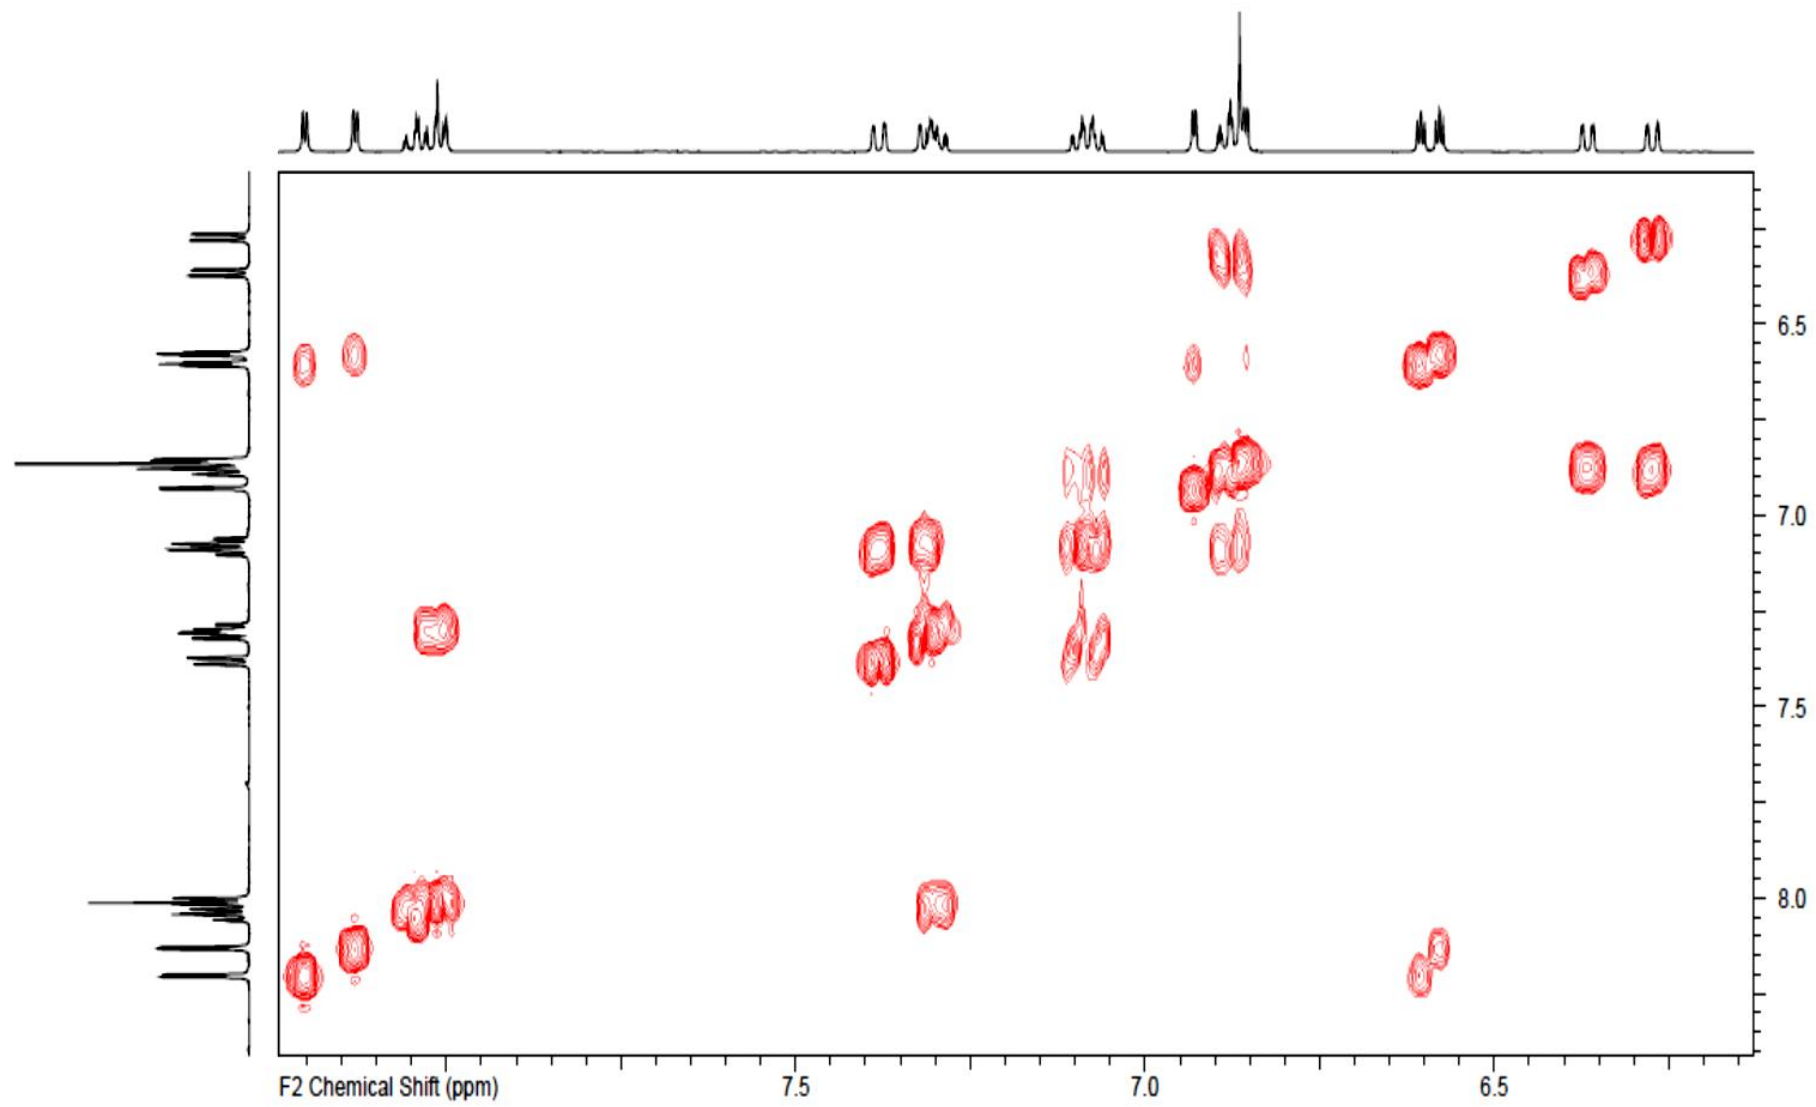

Section of the NOESY spectrum of **2aHL<sub>2</sub>**

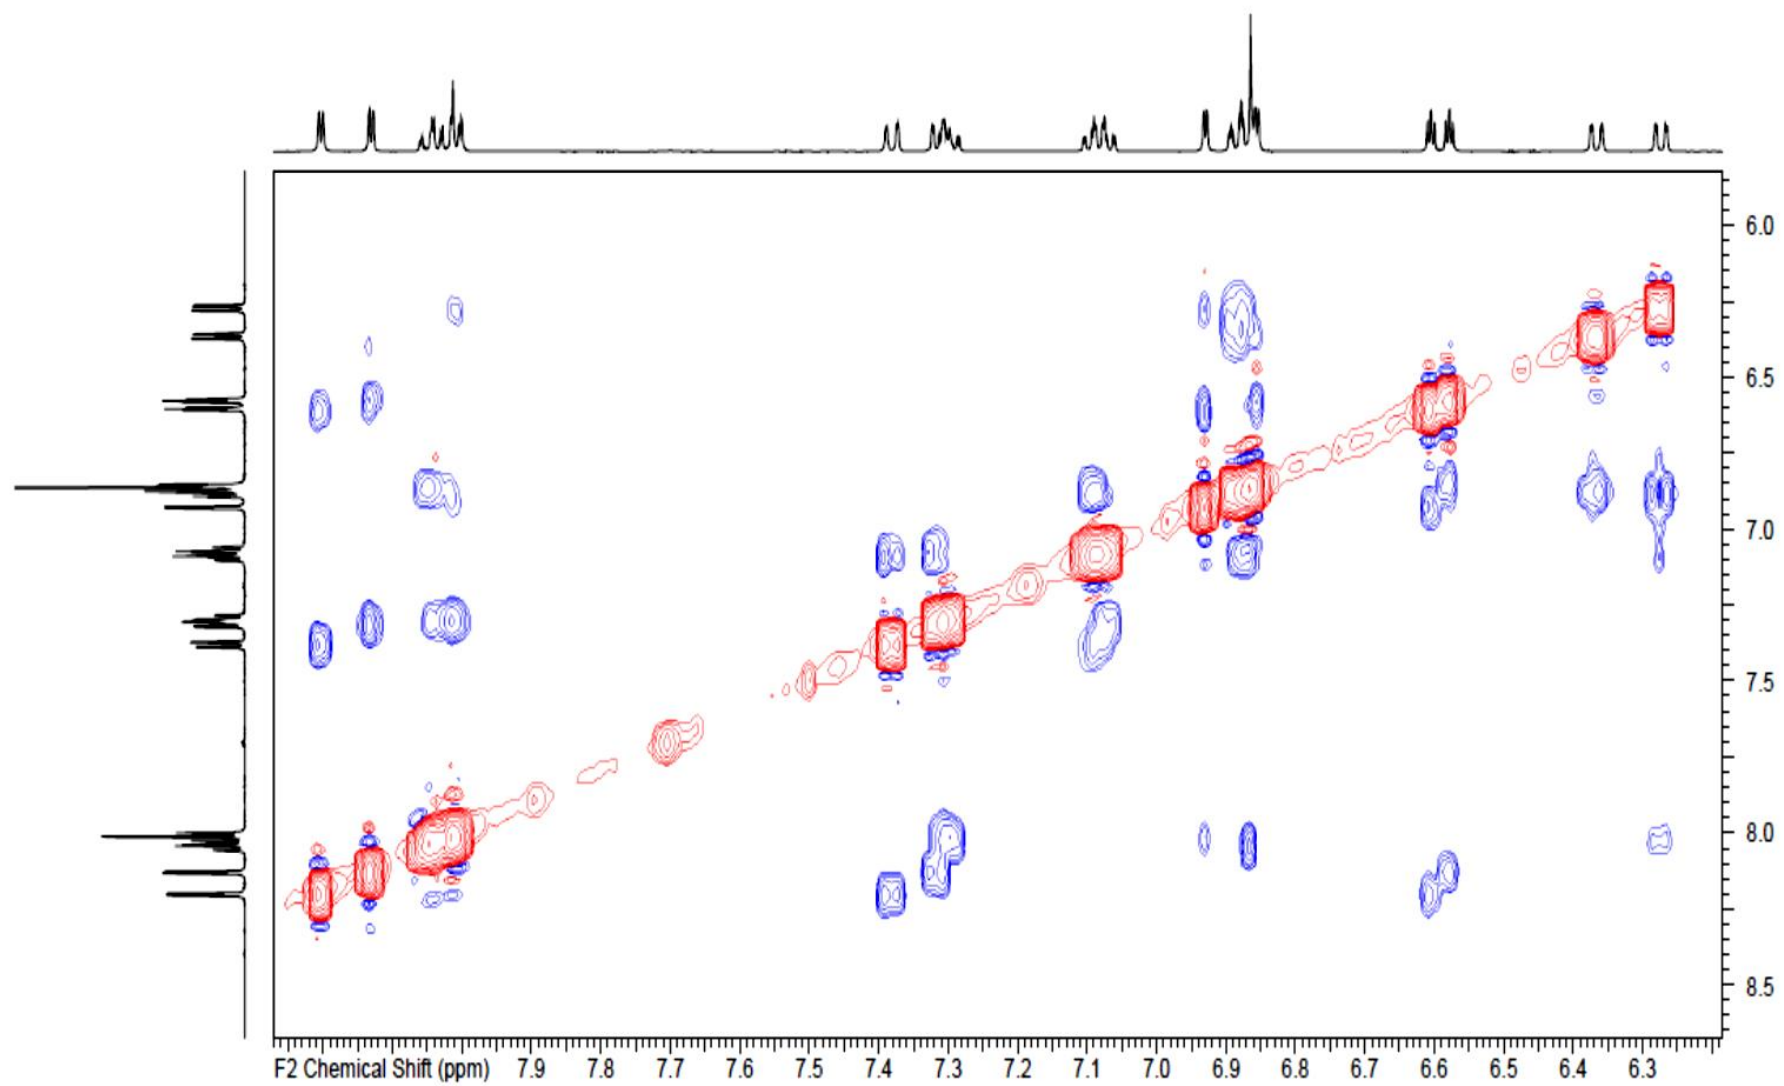

$^1\text{H}$  NMR spectrum of **2aHL<sub>3</sub>**

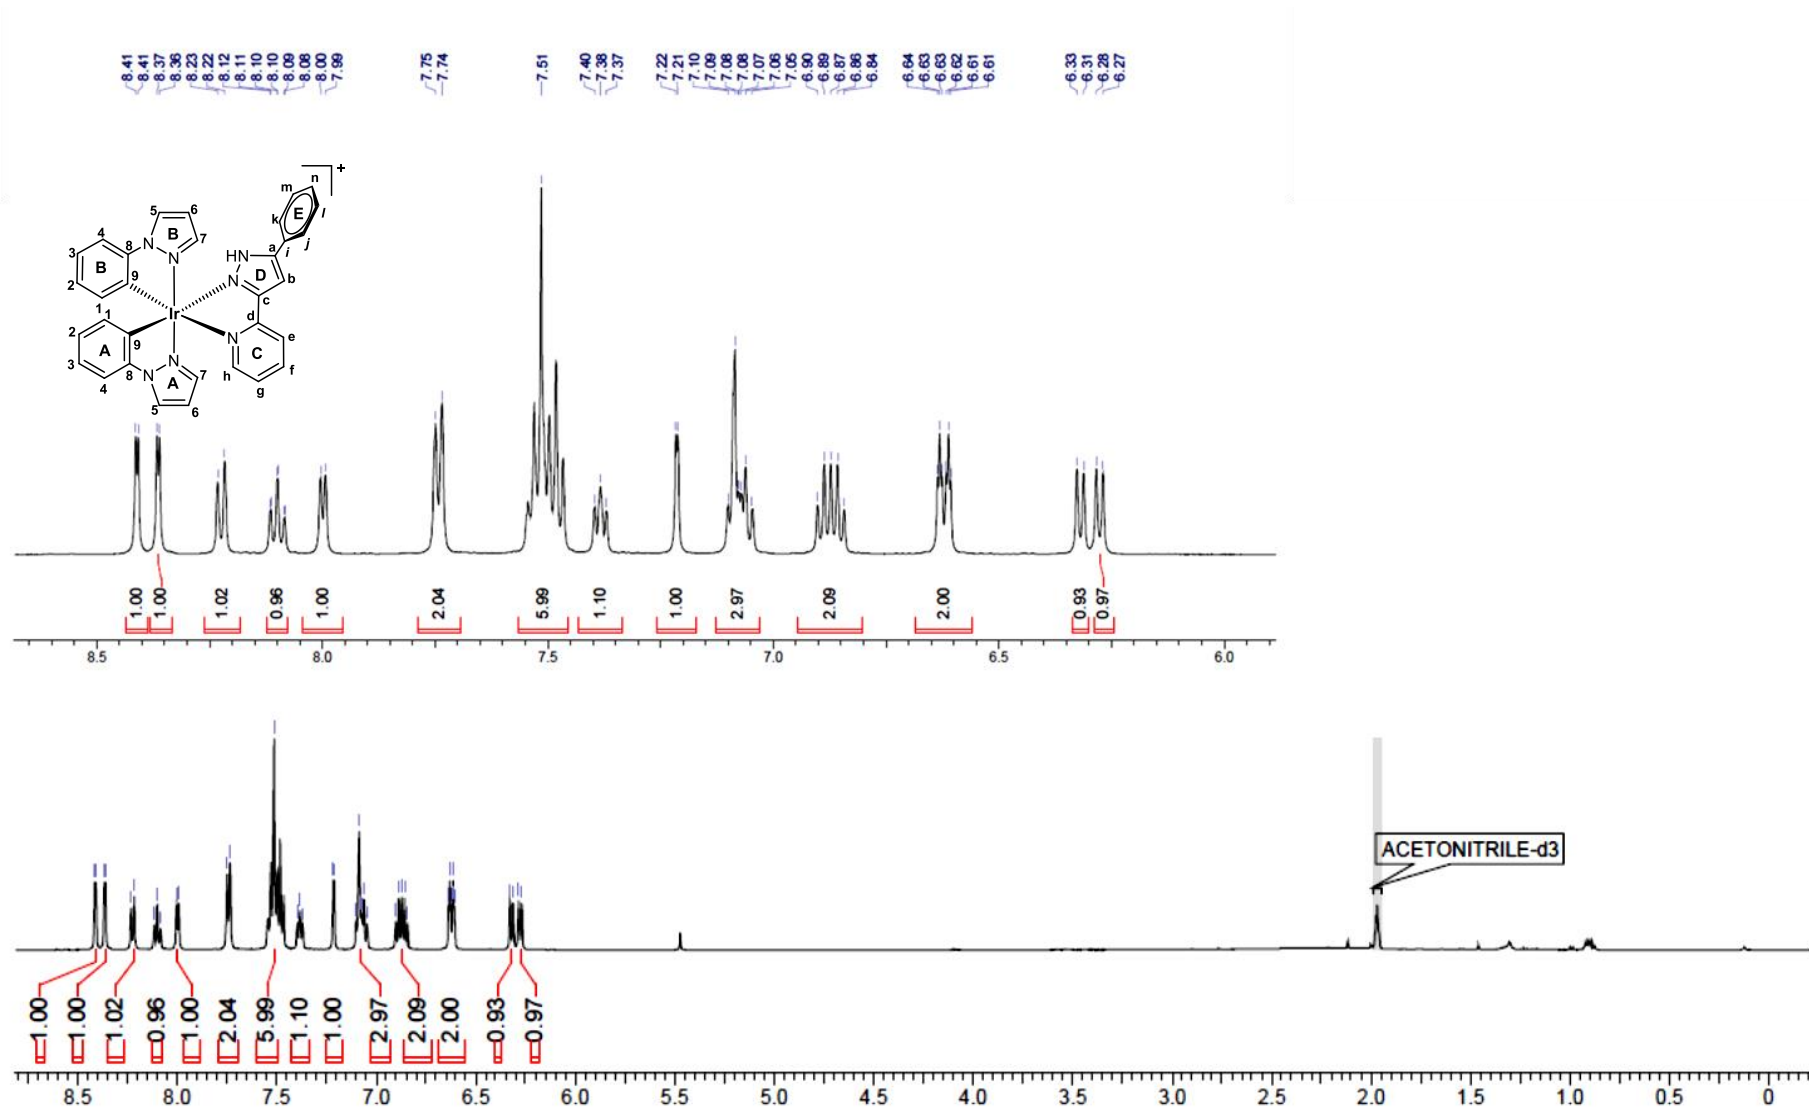

$^{13}\text{C}$  NMR APT spectrum of **2aHL<sub>3</sub>**

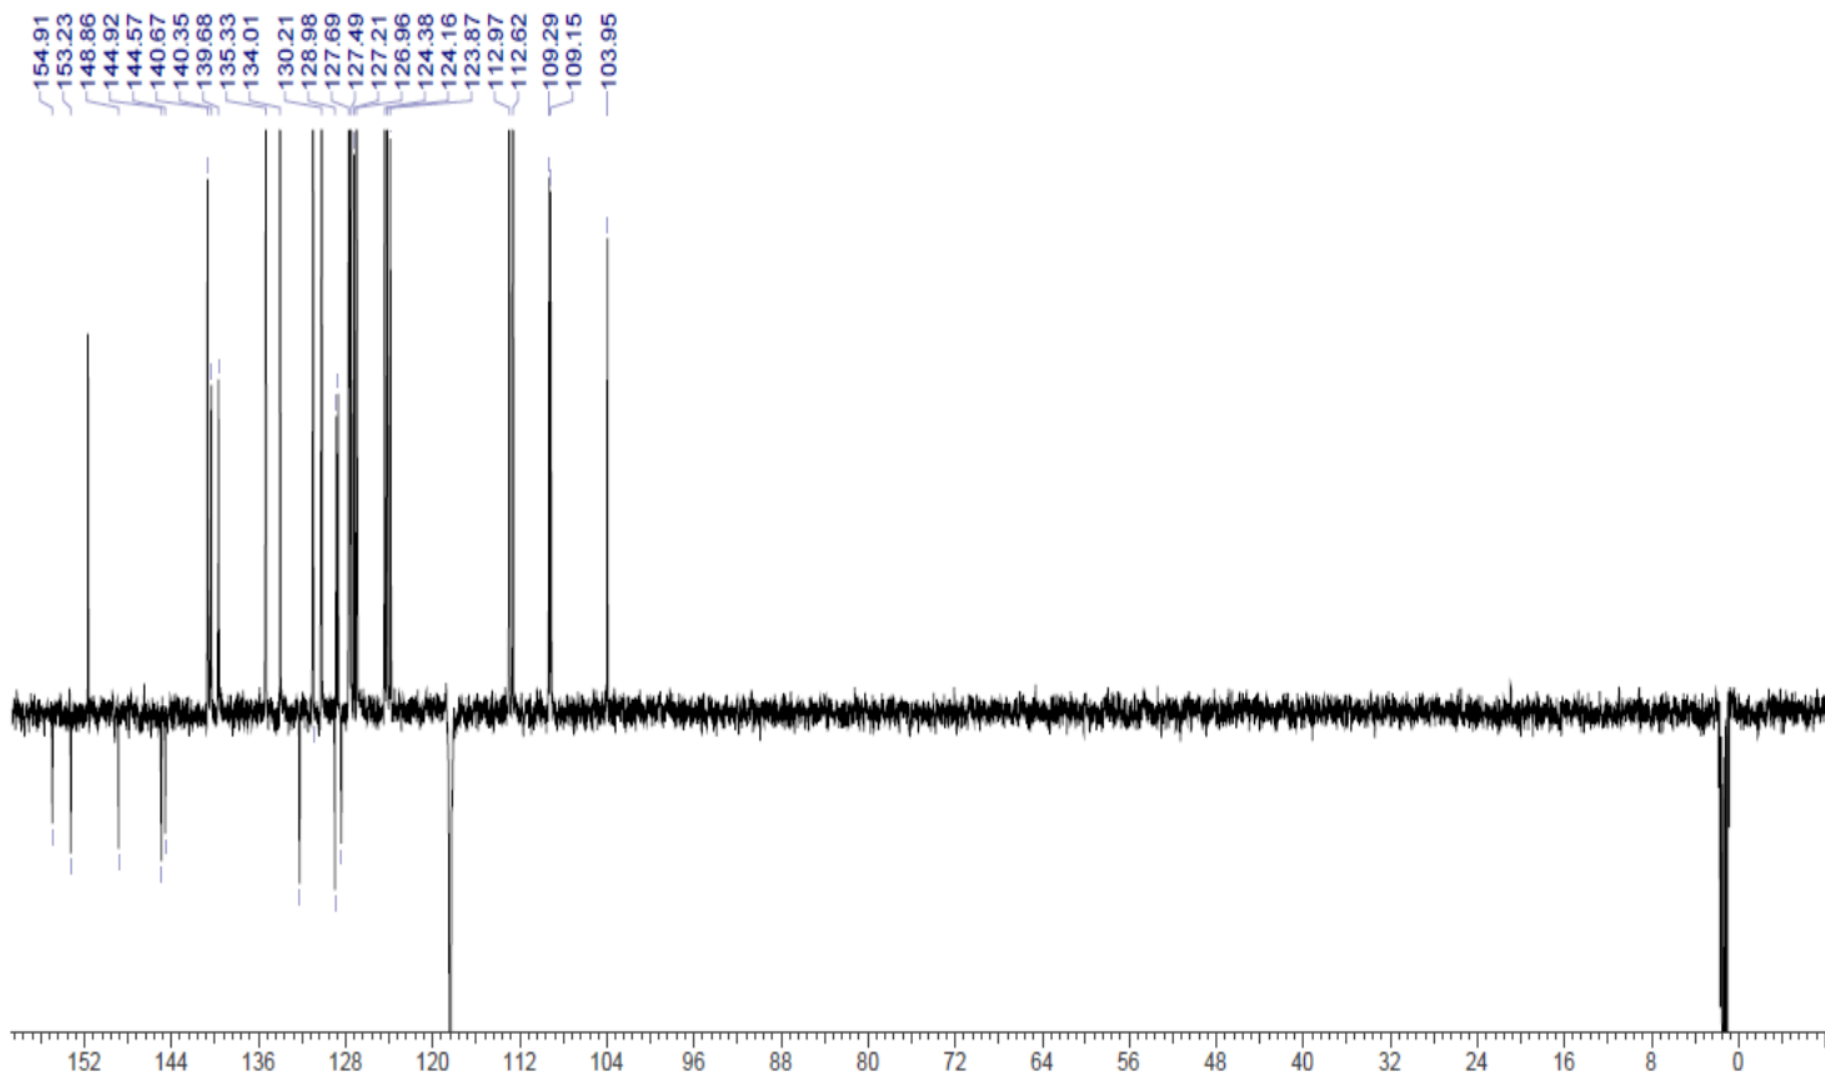

Section of  $^{13}\text{C}$  NMR APT spectrum of **2aHL<sub>3</sub>**

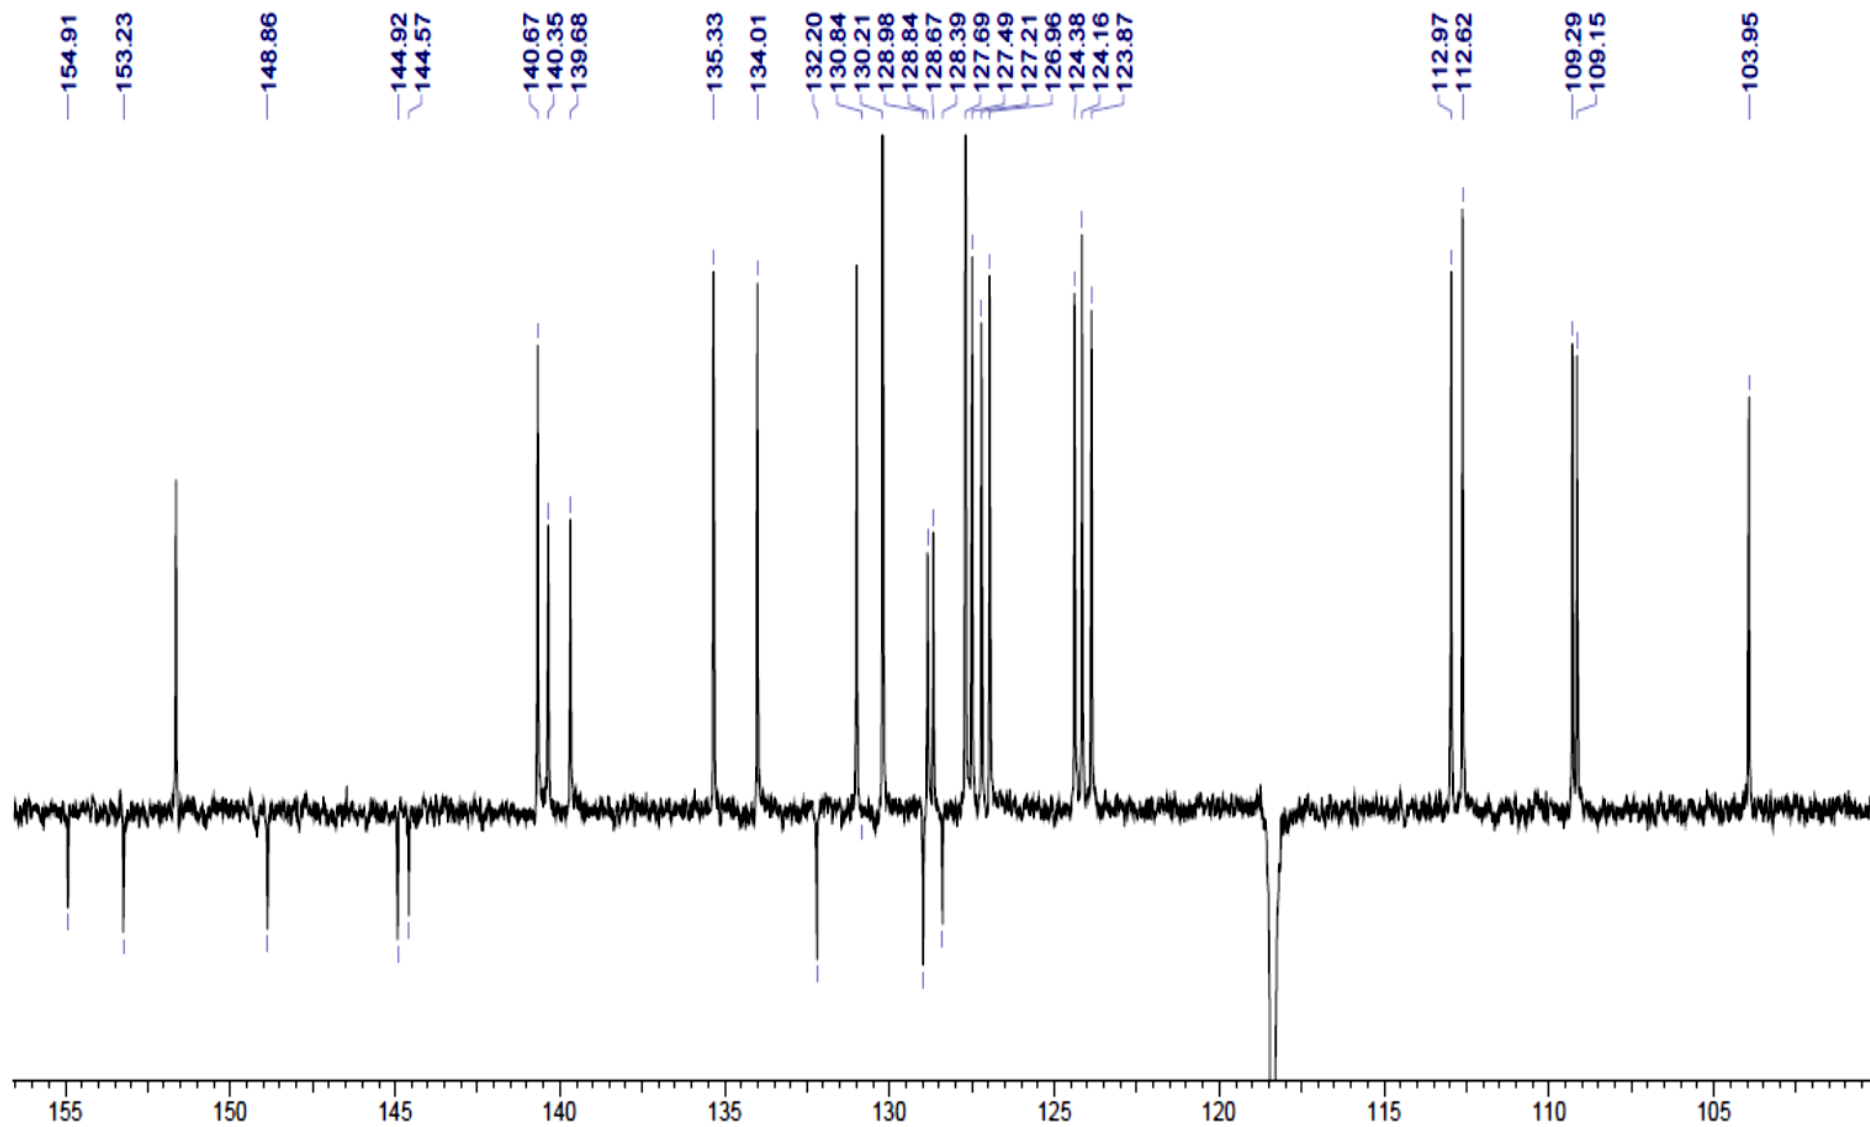

Section of the TOCSY spectrum of **2aHL<sub>3</sub>**

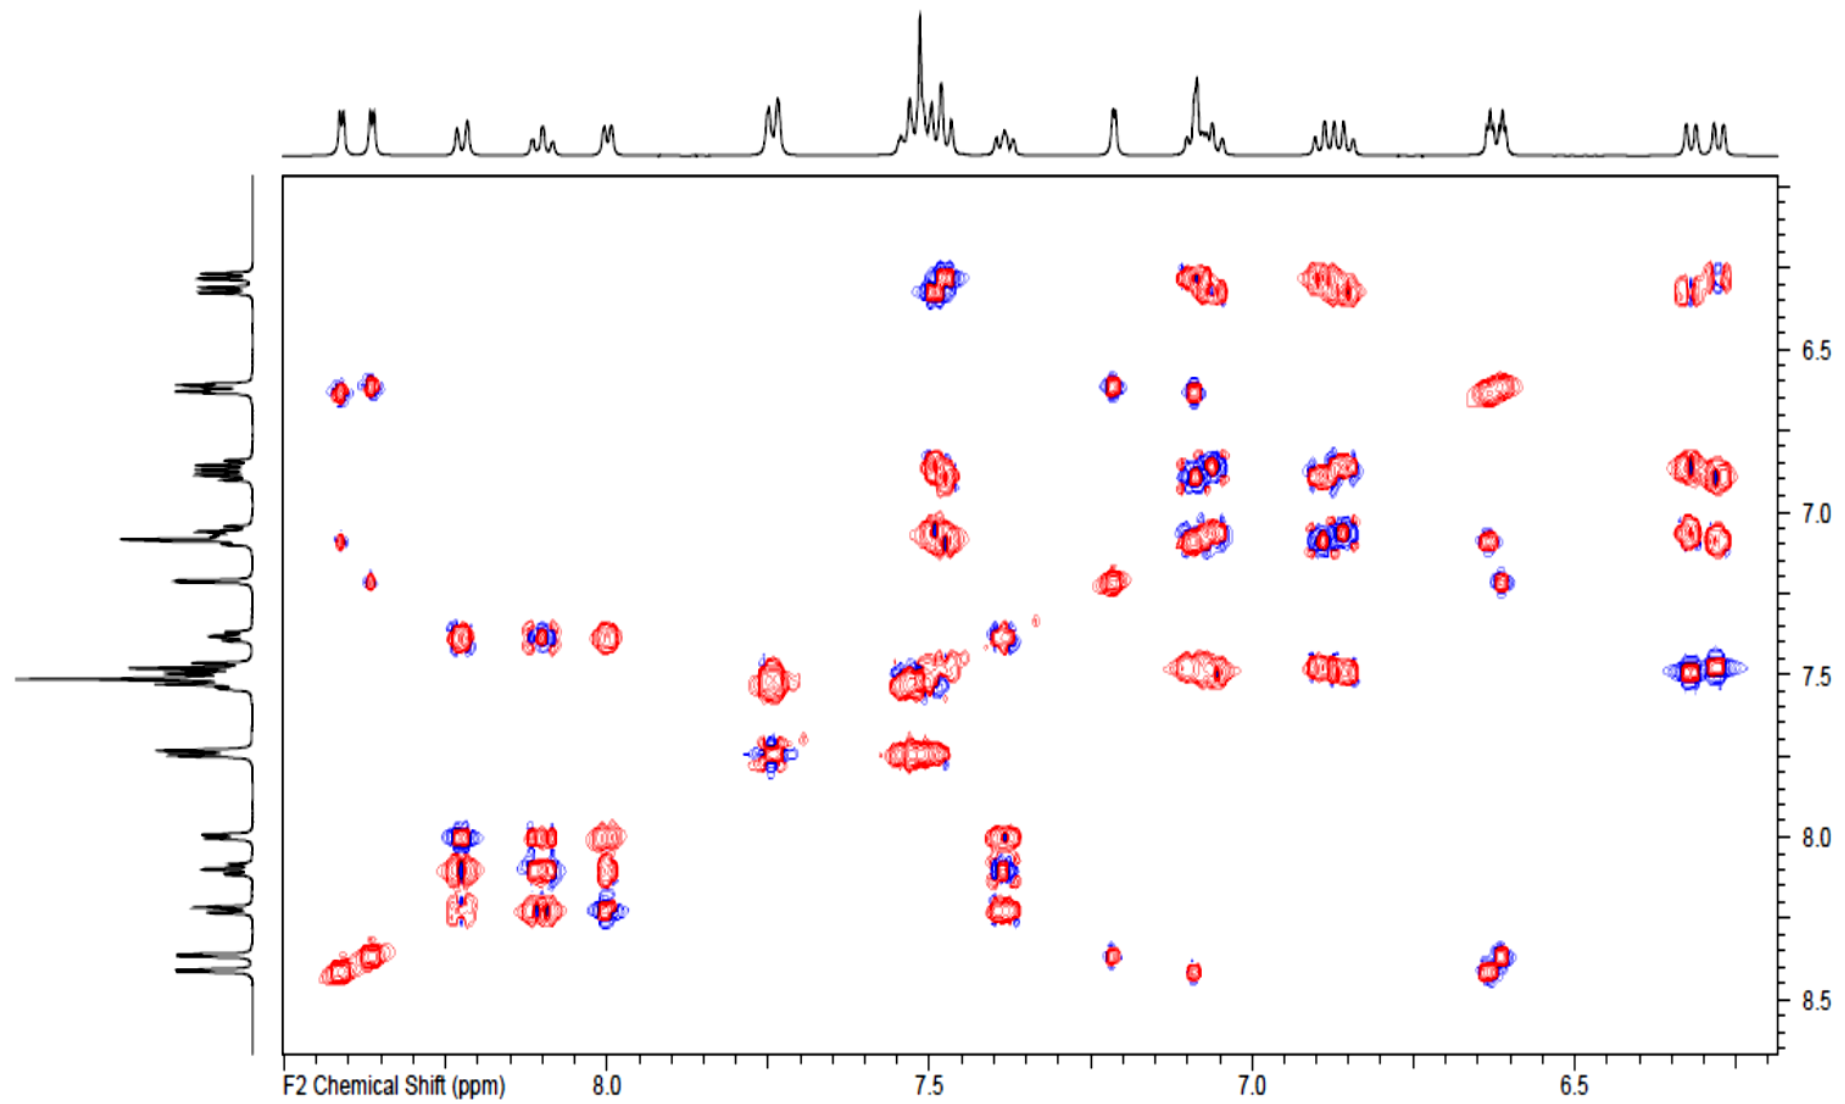

Section of the COSY spectrum of **2aHL<sub>3</sub>**

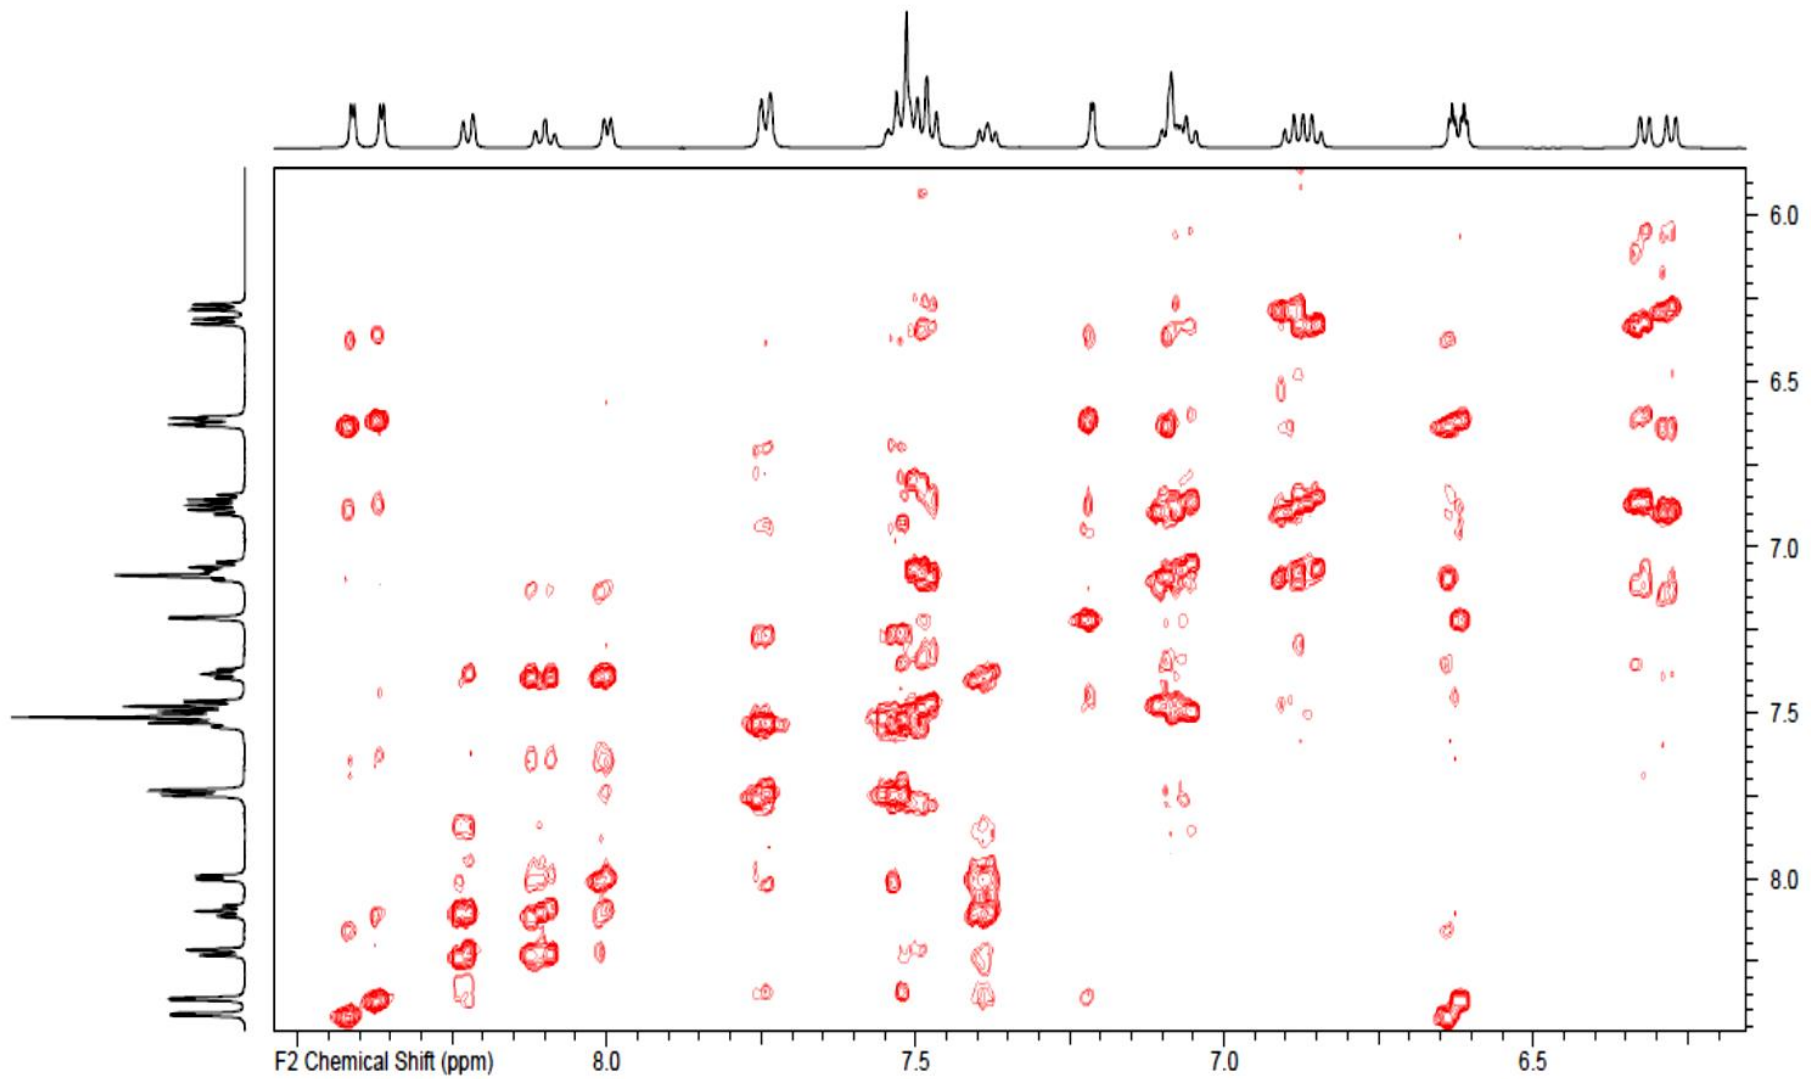



Section of the NOESY spectrum of **2aHL<sub>3</sub>**

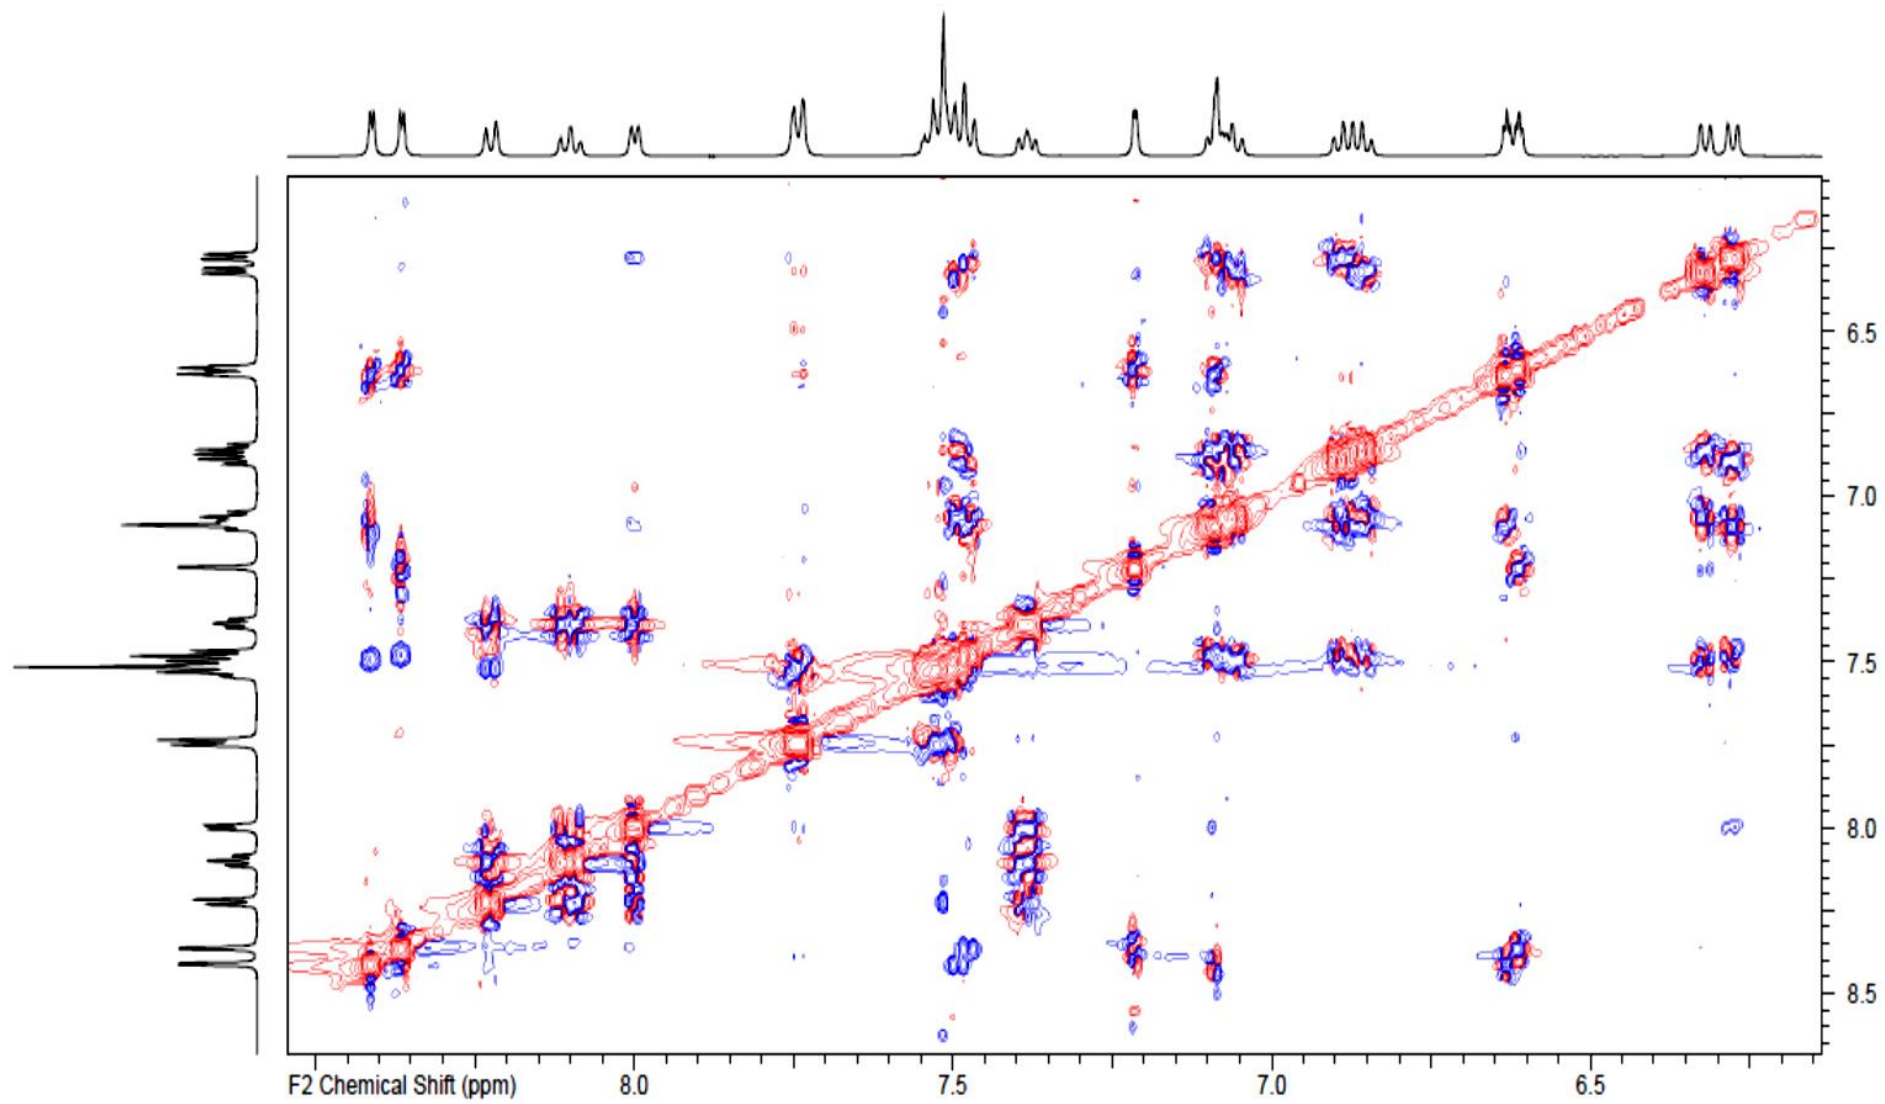

$^1\text{H}$  NMR spectrum of **3aL1**

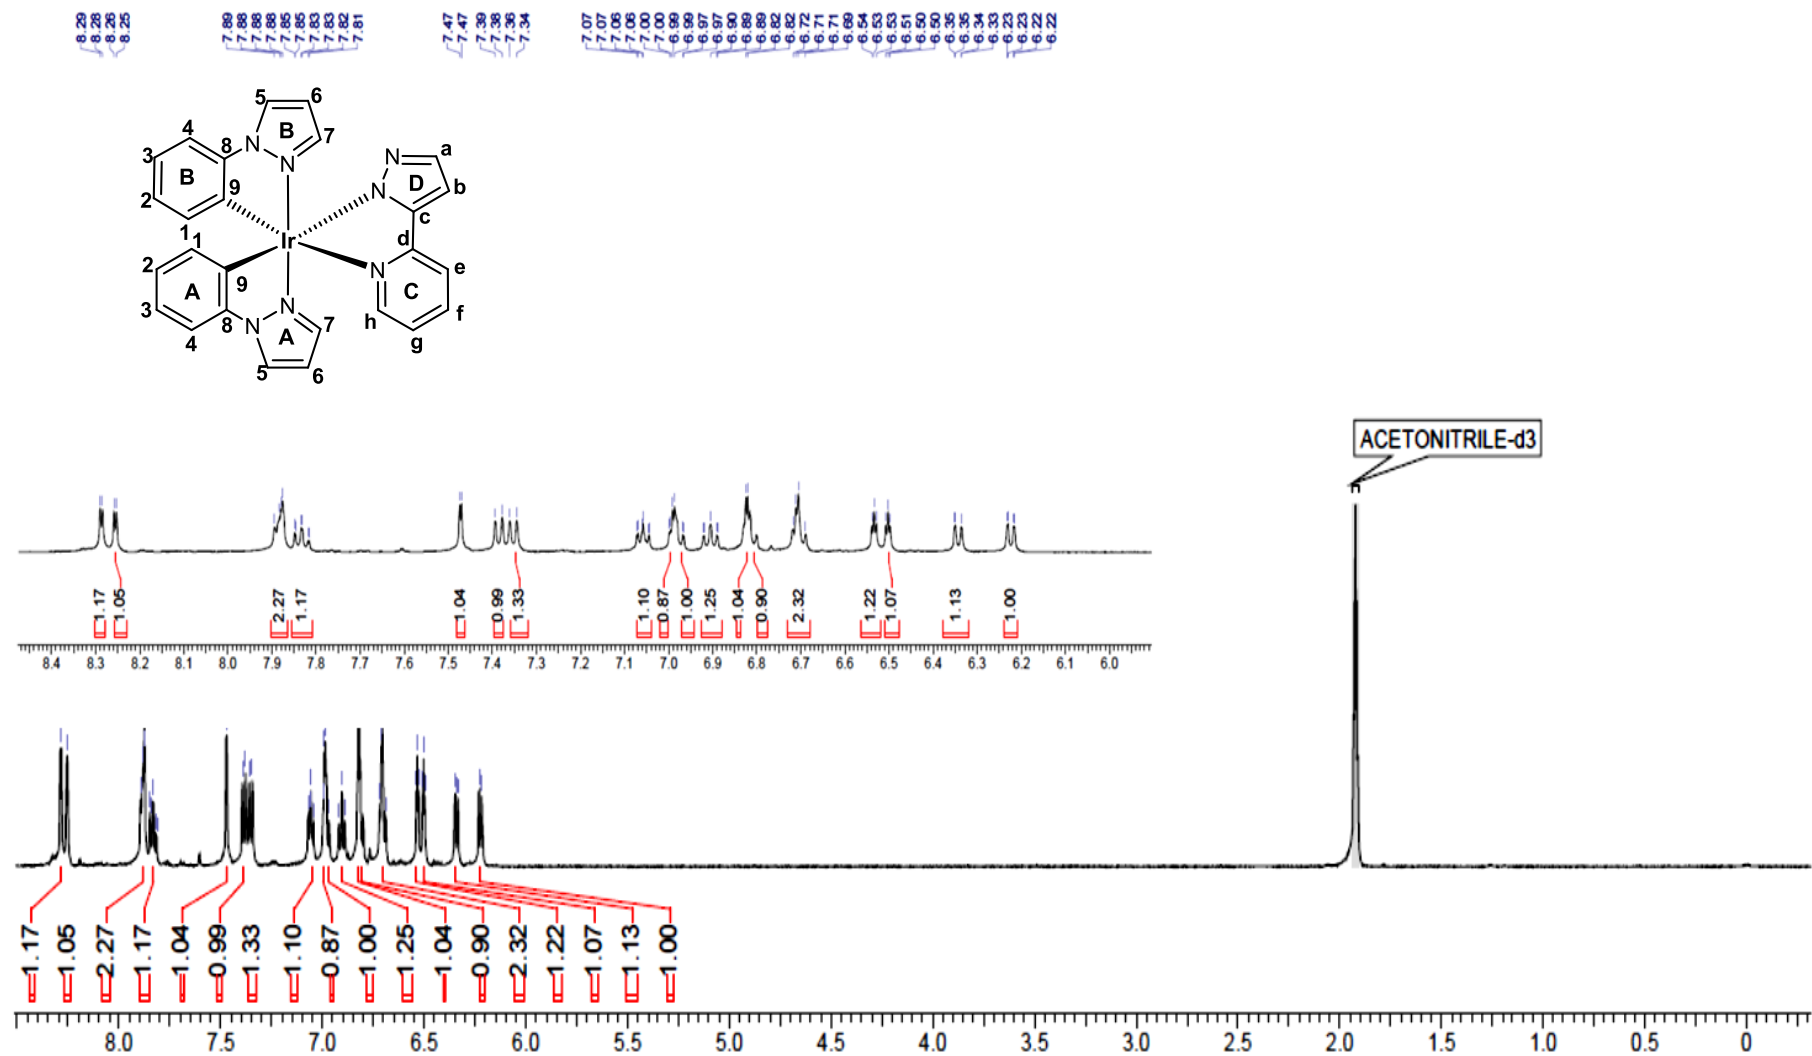

<sup>13</sup>C DEPT spectrum of 3aL<sub>1</sub>

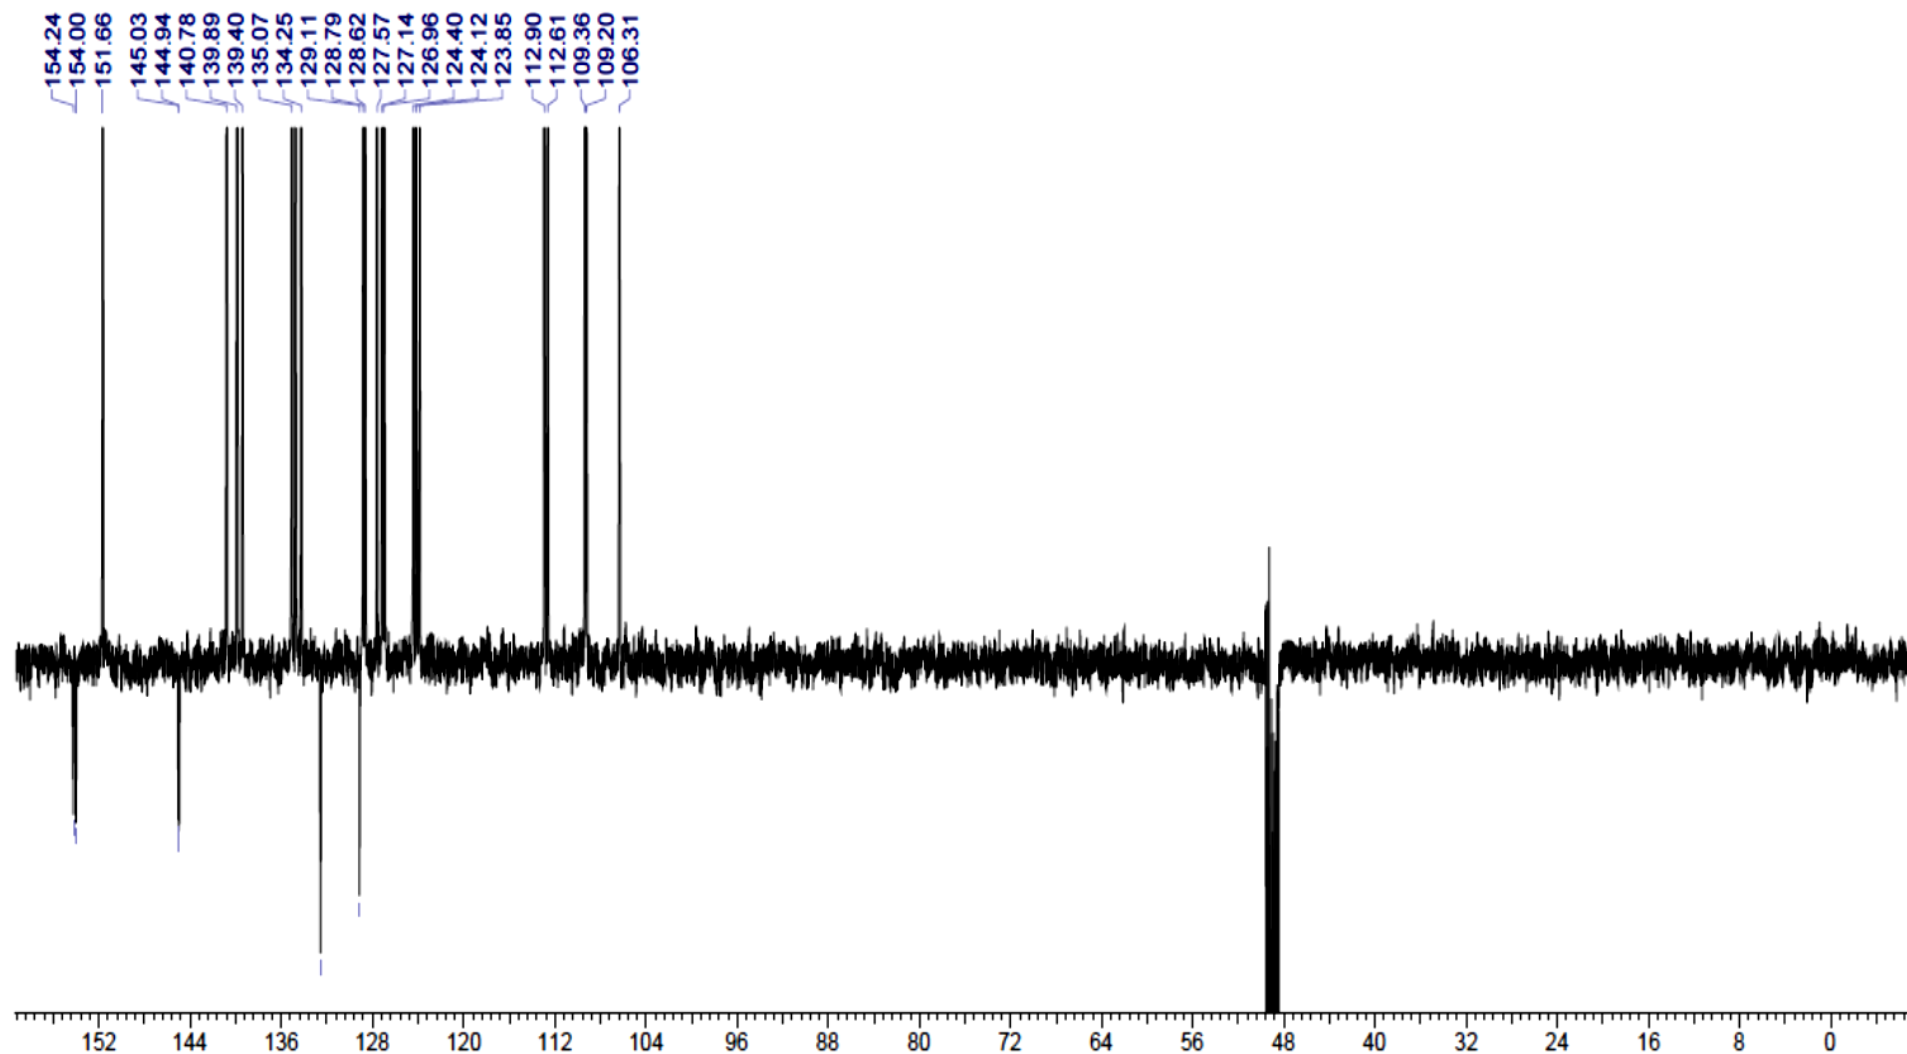

Section of  $^{13}\text{C}$  DEPT spectrum of **3aL1**

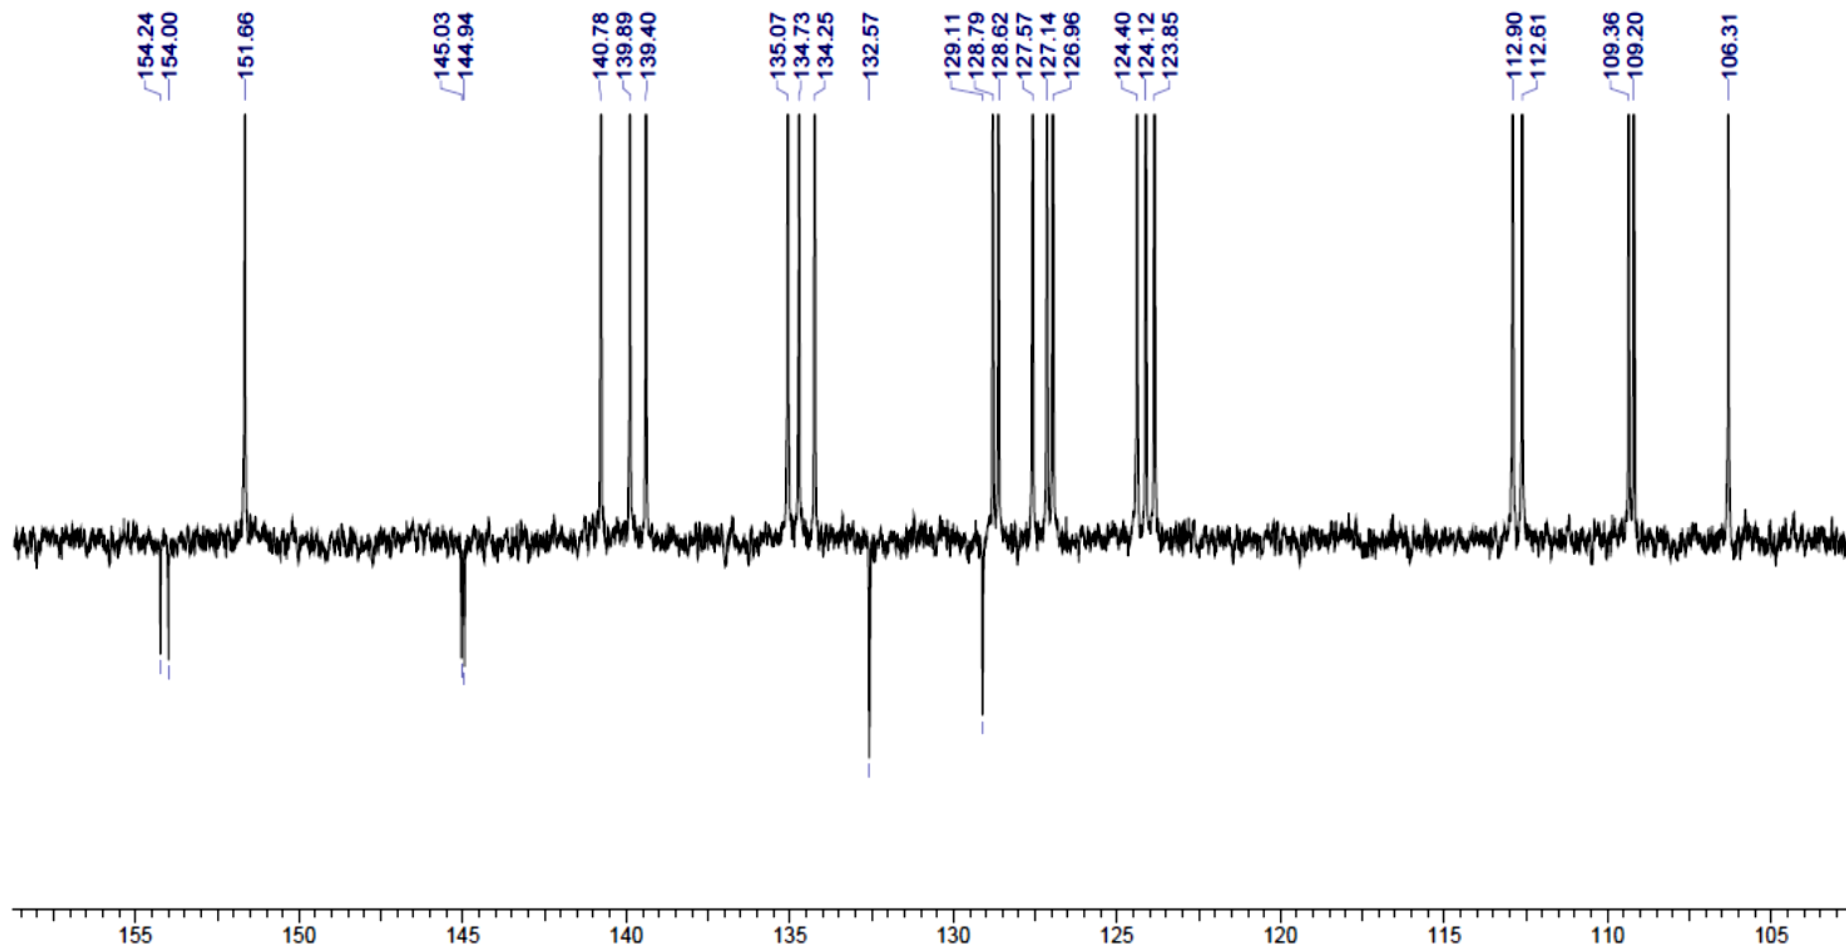

Section of the TOCSY spectrum of **3aL<sub>1</sub>**

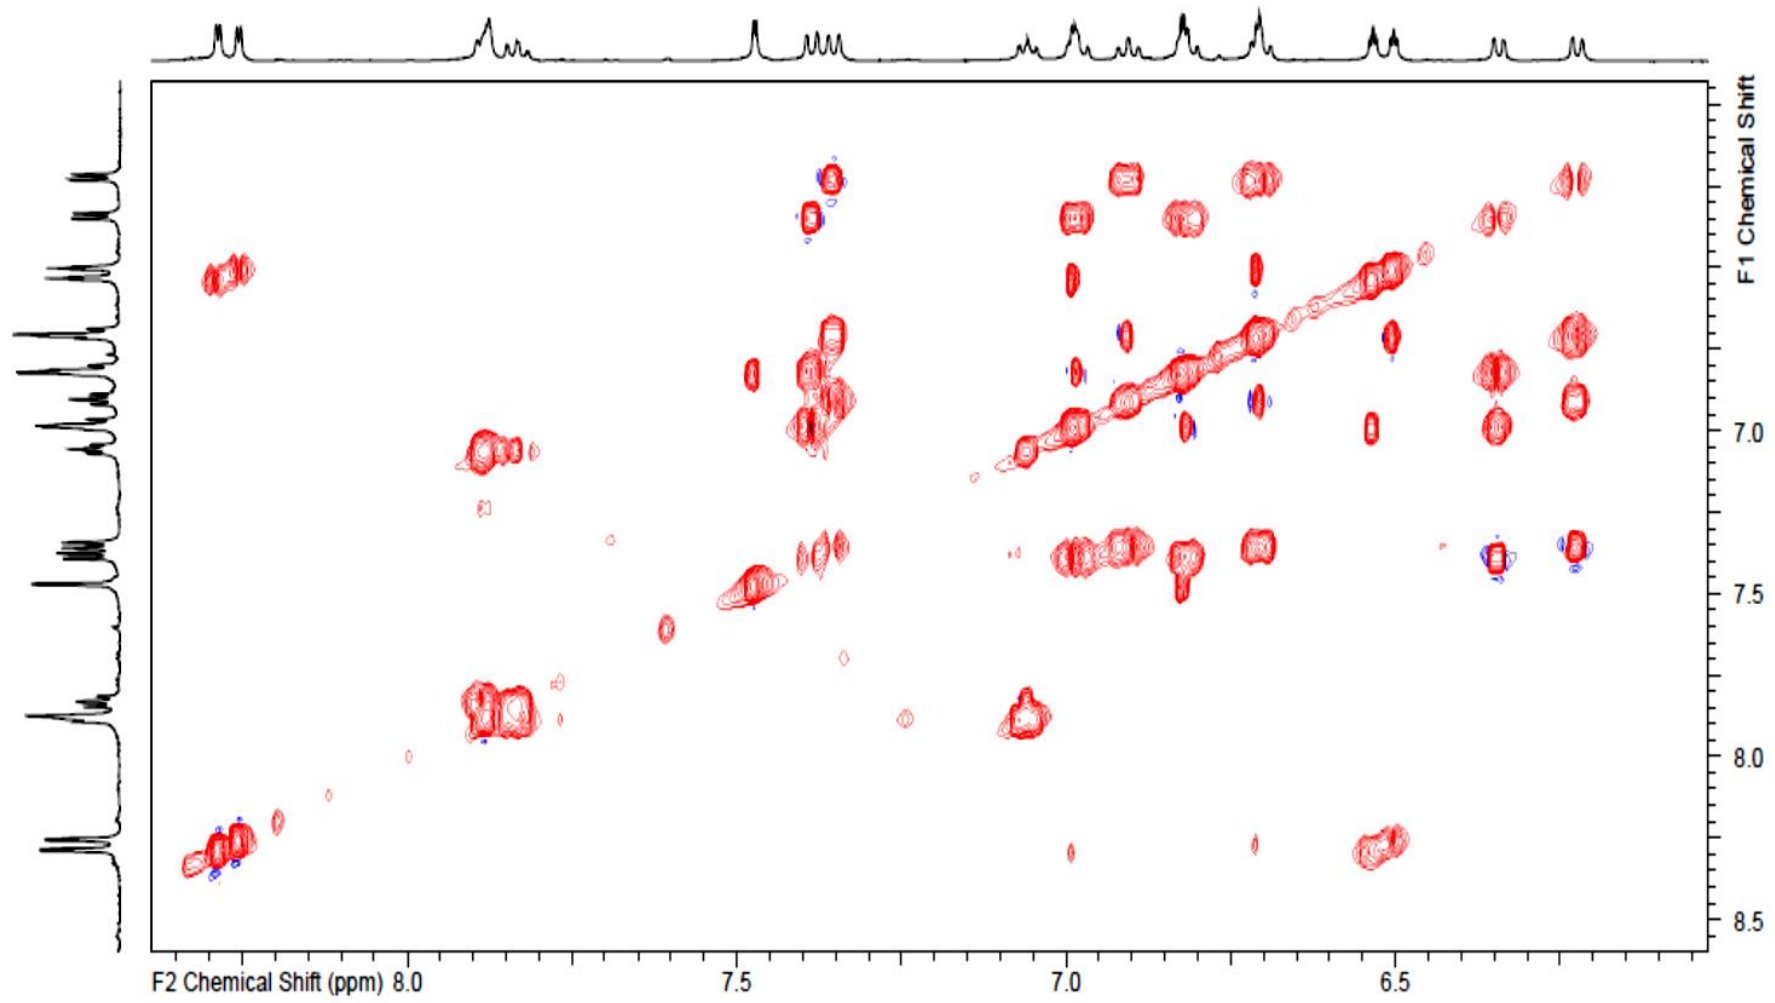

Section of the COSY spectrum of **3aL1**

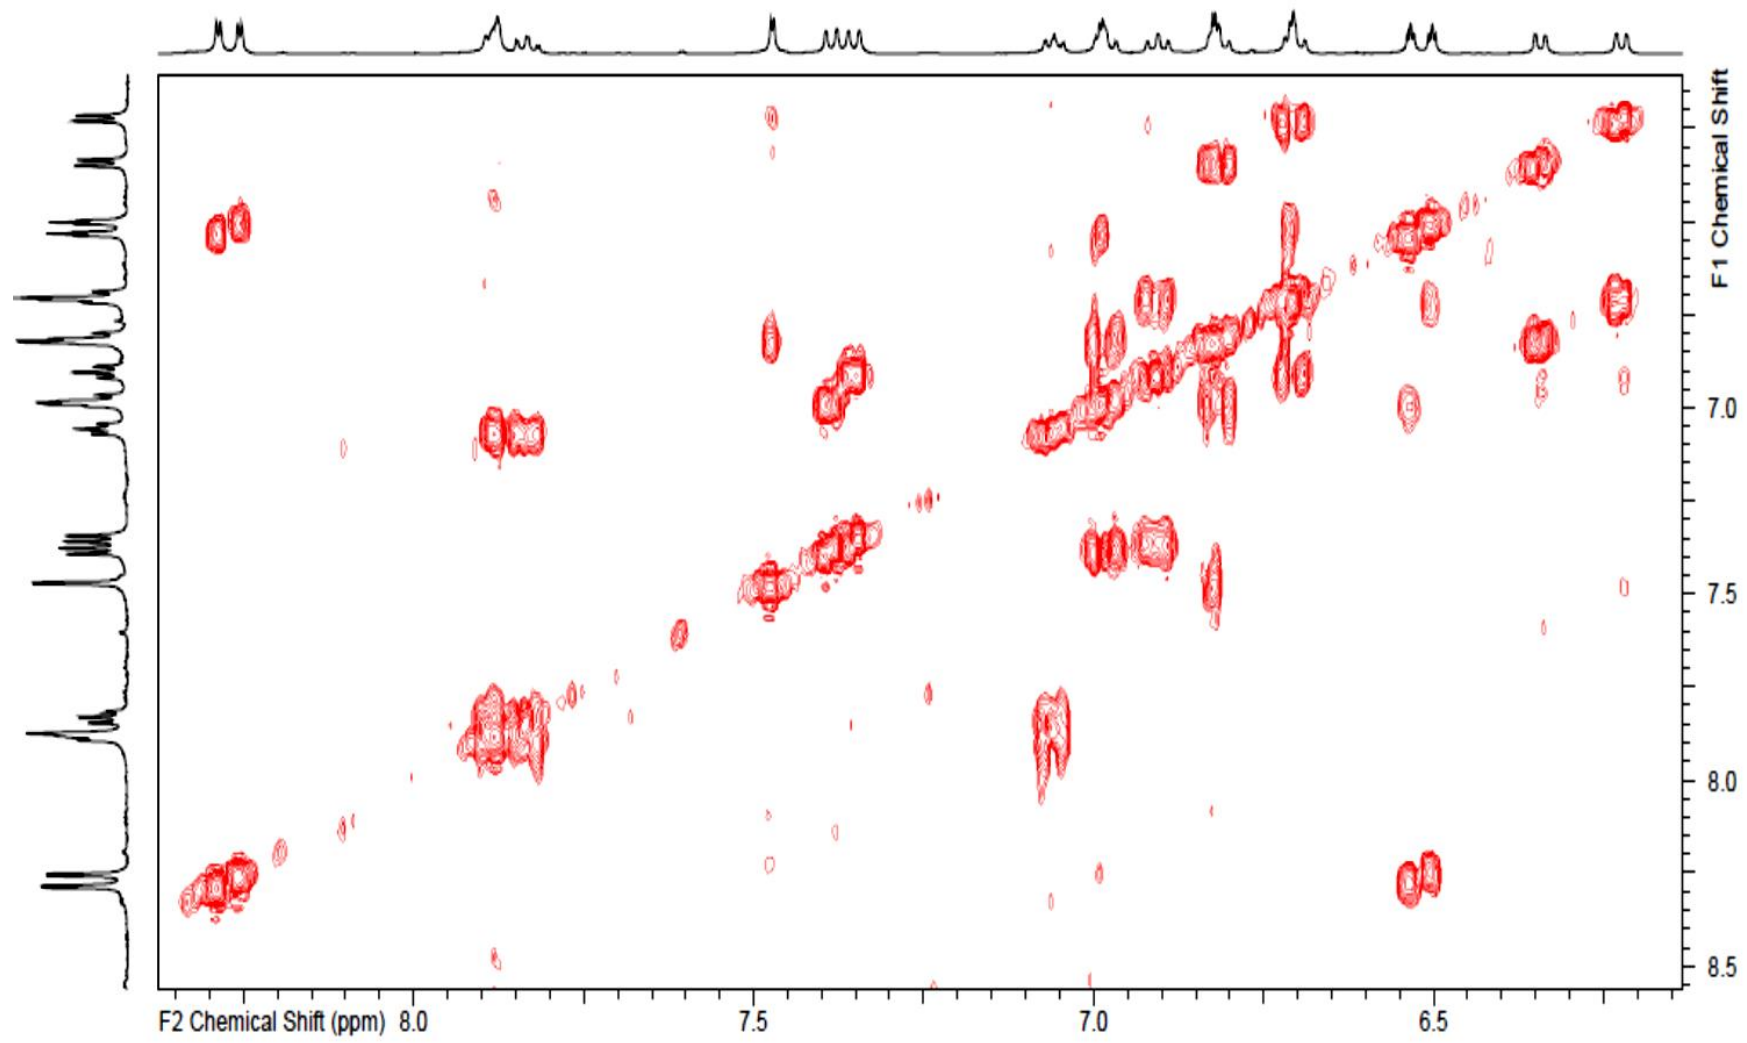

Section of the NOESY spectrum of **3aL<sub>1</sub>**

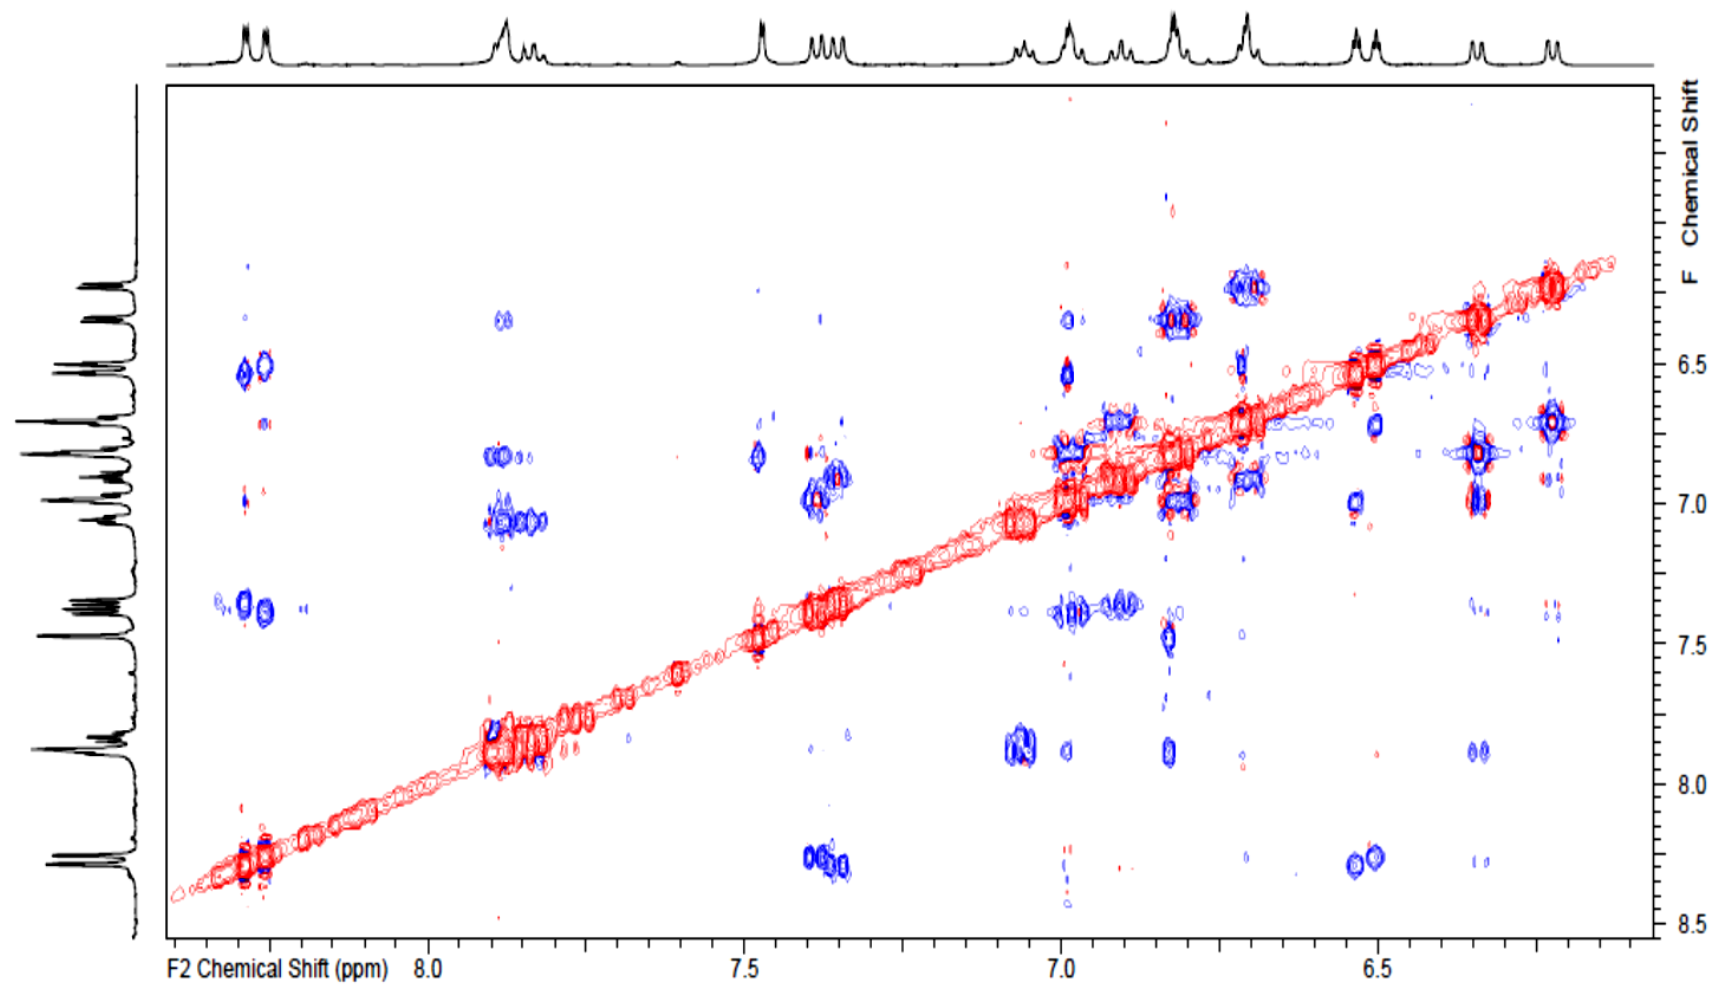

$^1\text{H}$  NMR spectrum of **3aL2**

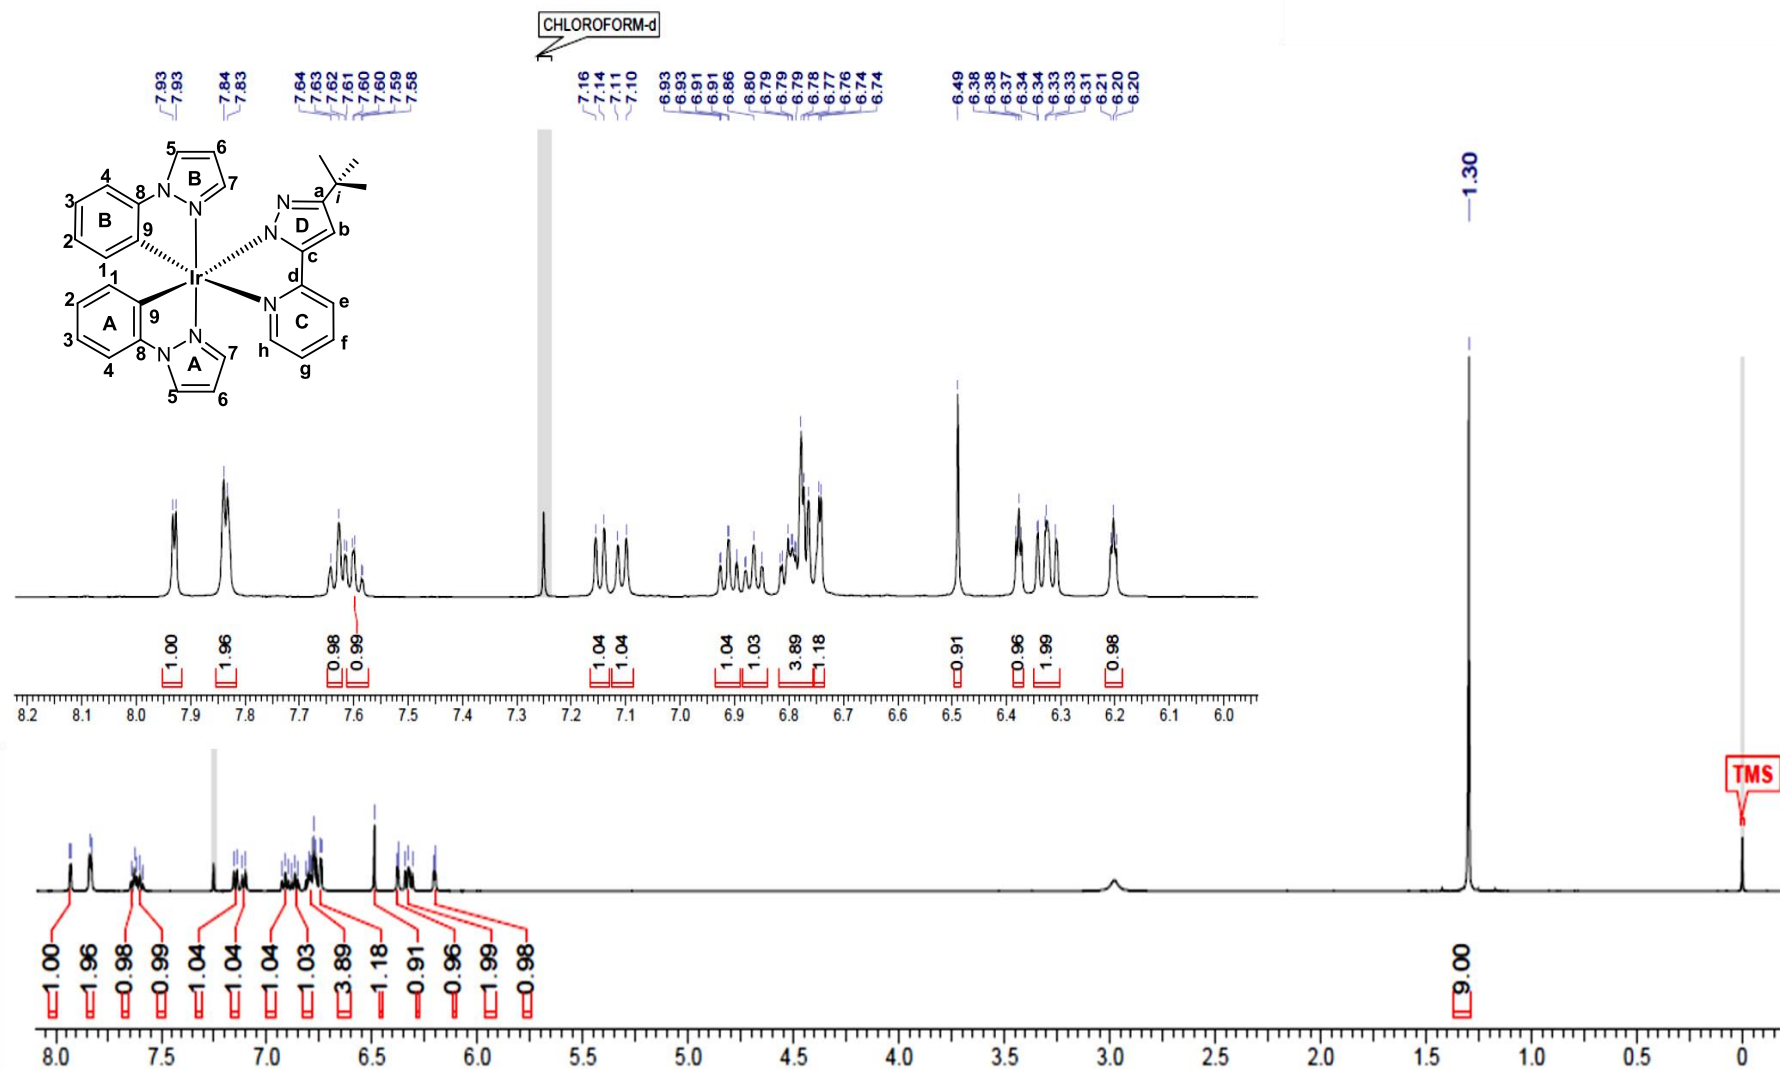



$^{13}\text{C}$  APT spectrum of 3aL<sub>2</sub>

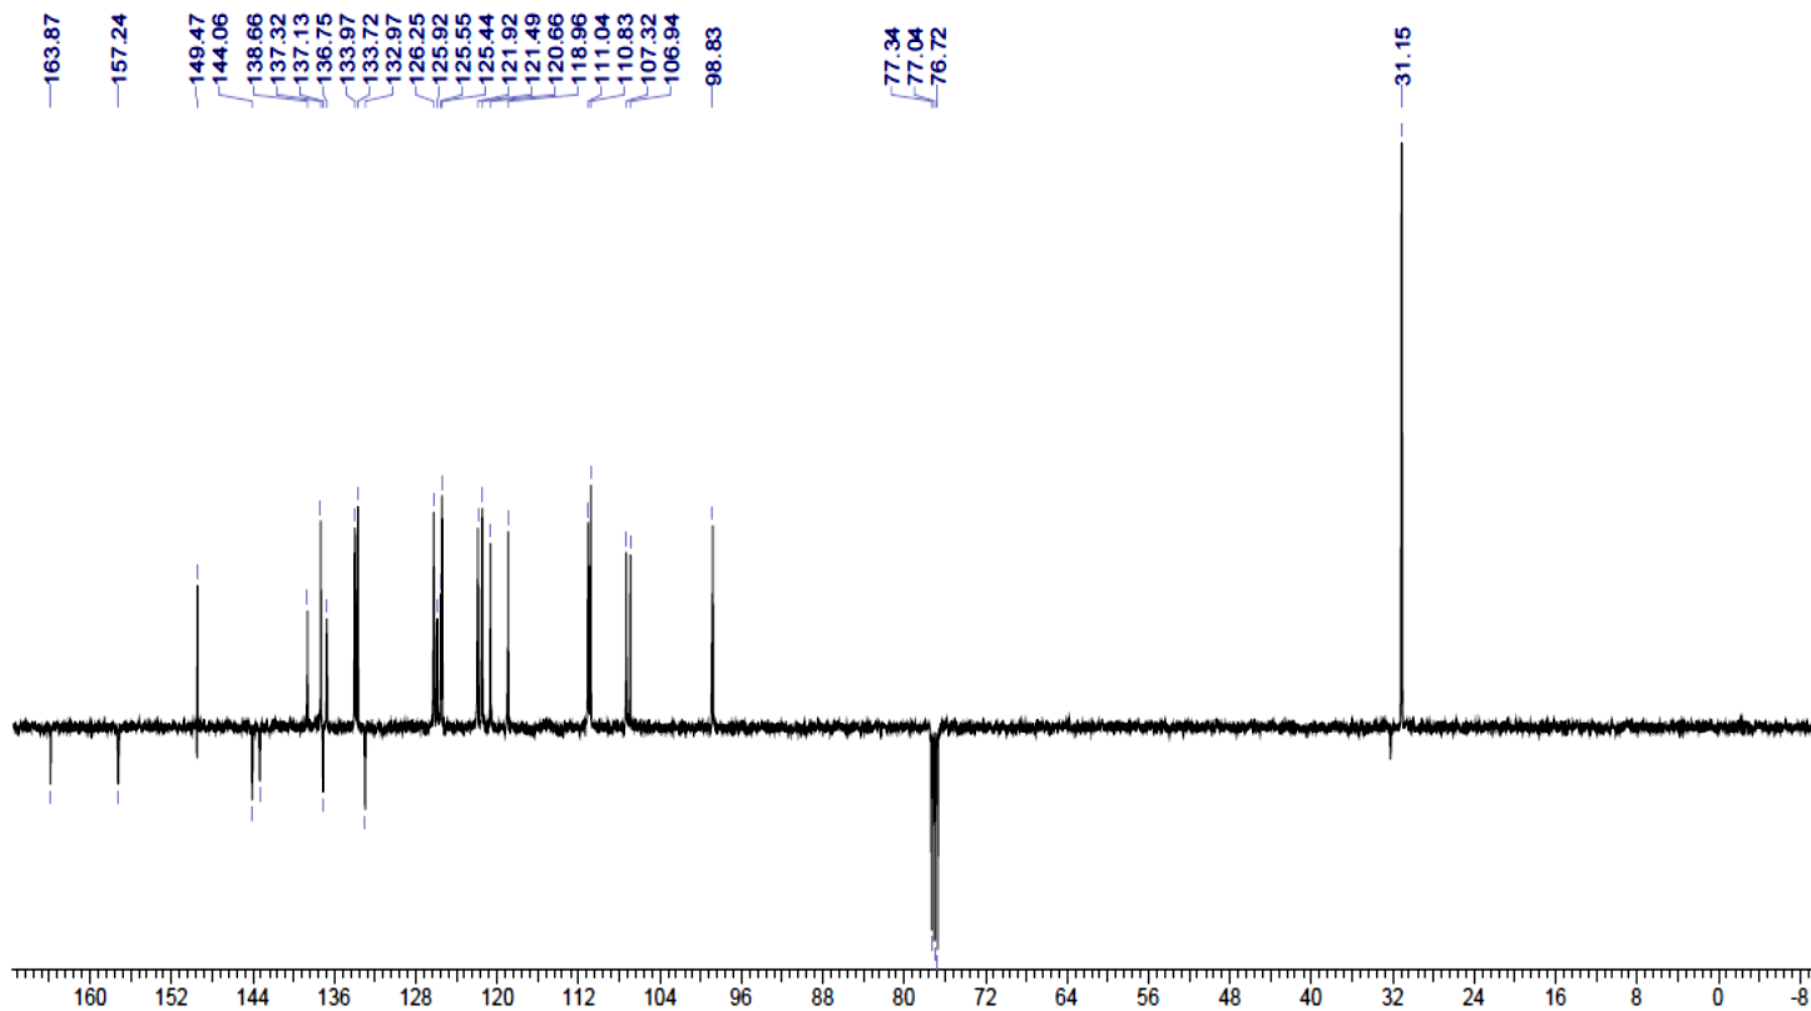

Section of  $^{13}\text{C}$  APT spectrum of **3aL2**

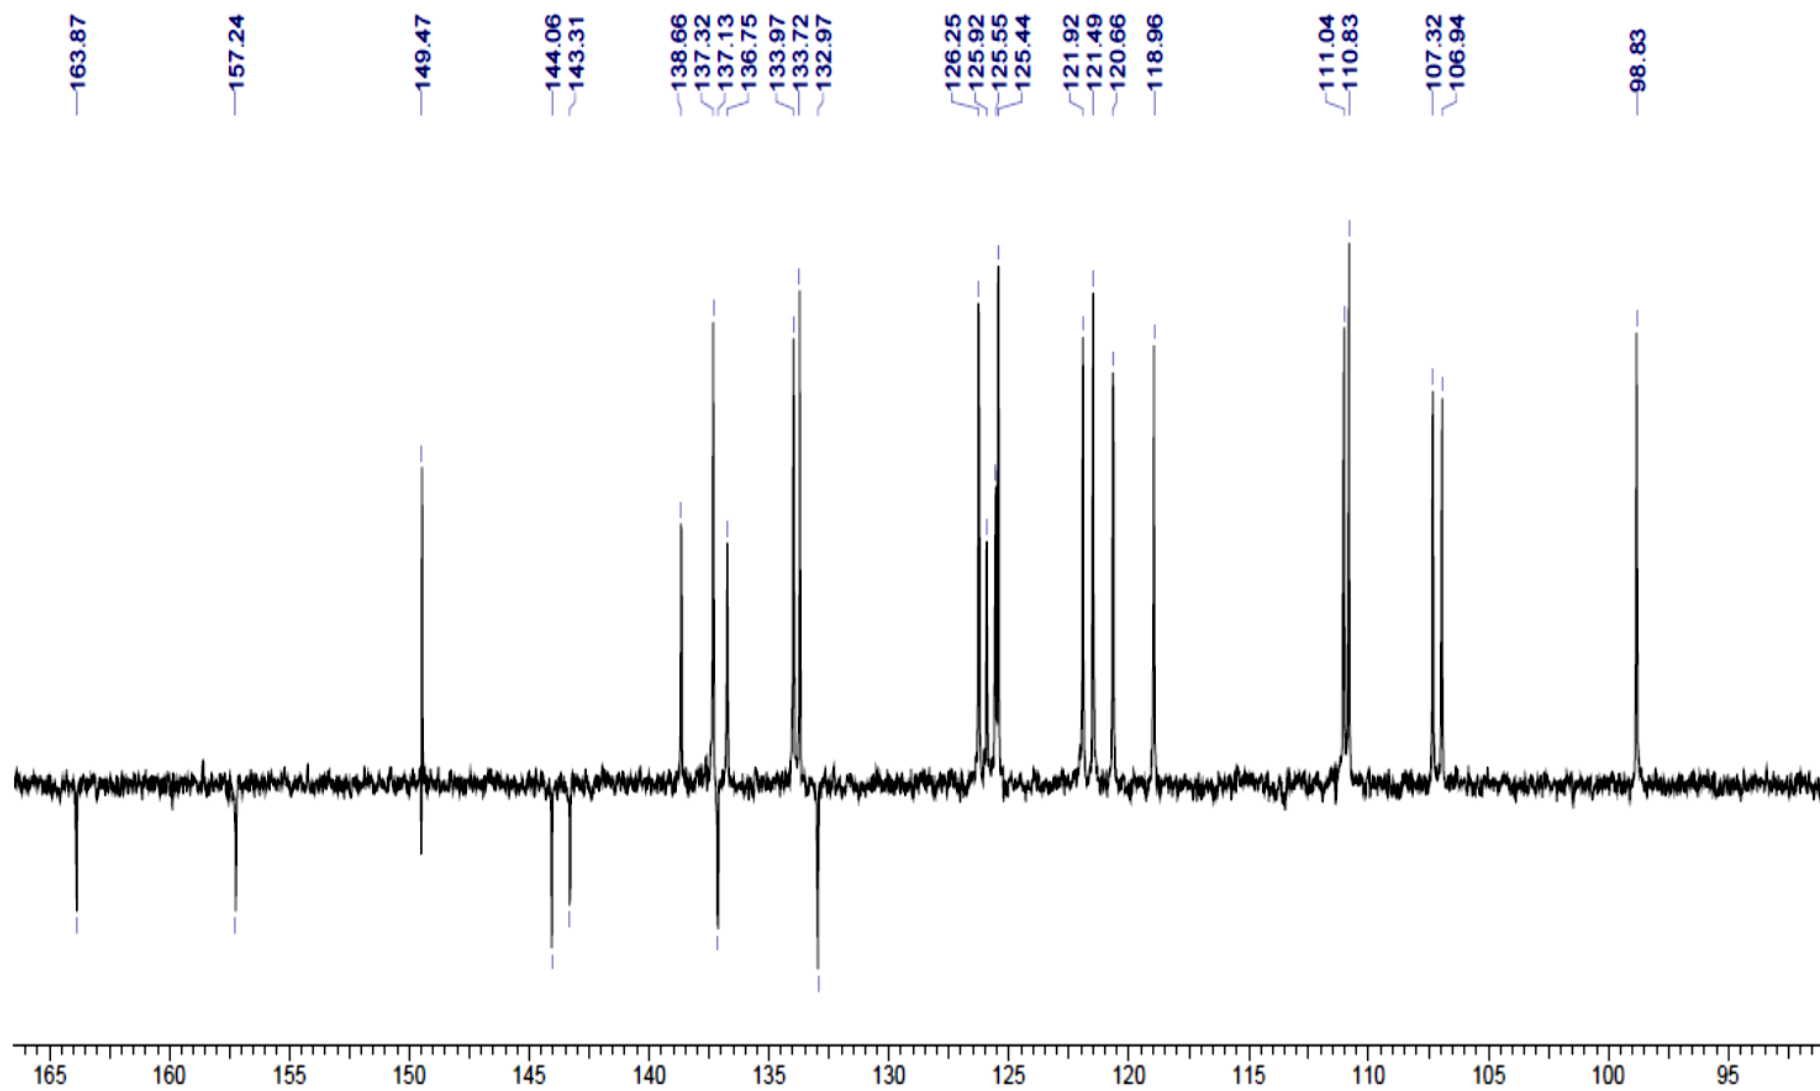

Section of the TOCSY spectrum of **3aL2**

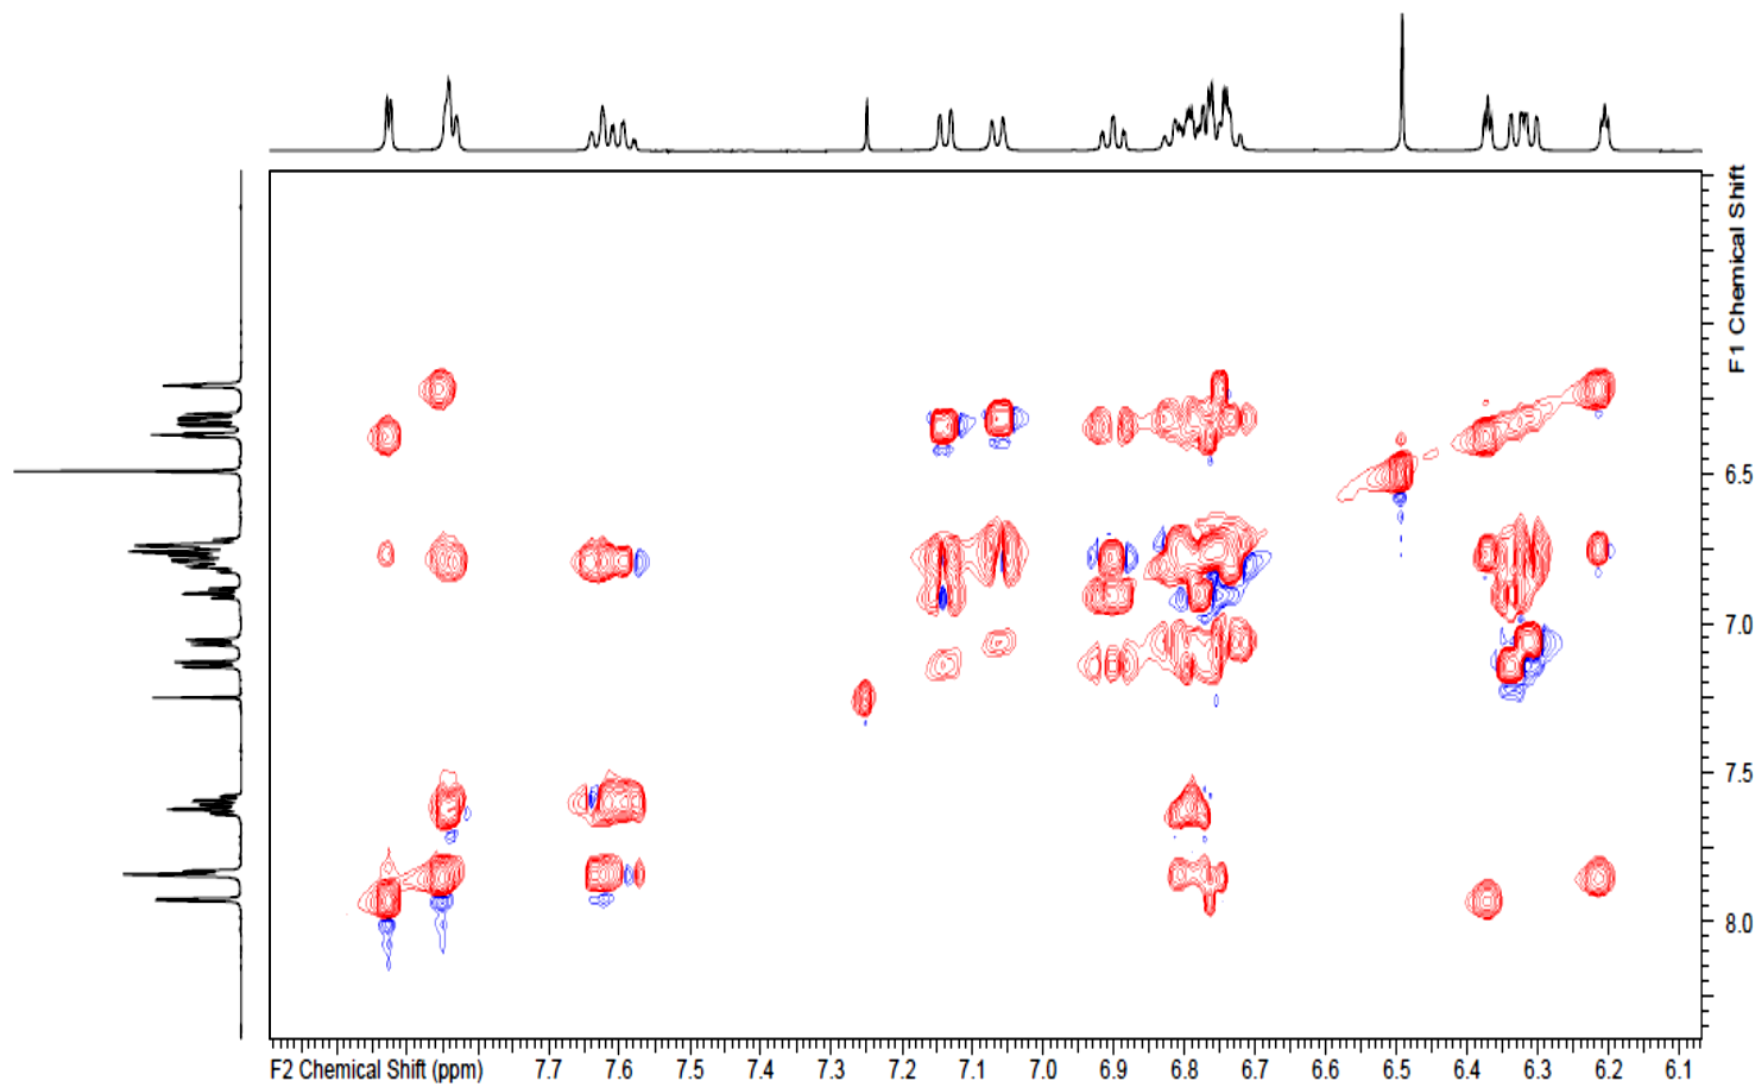

Section of the COSY spectrum of **3aL<sub>2</sub>**

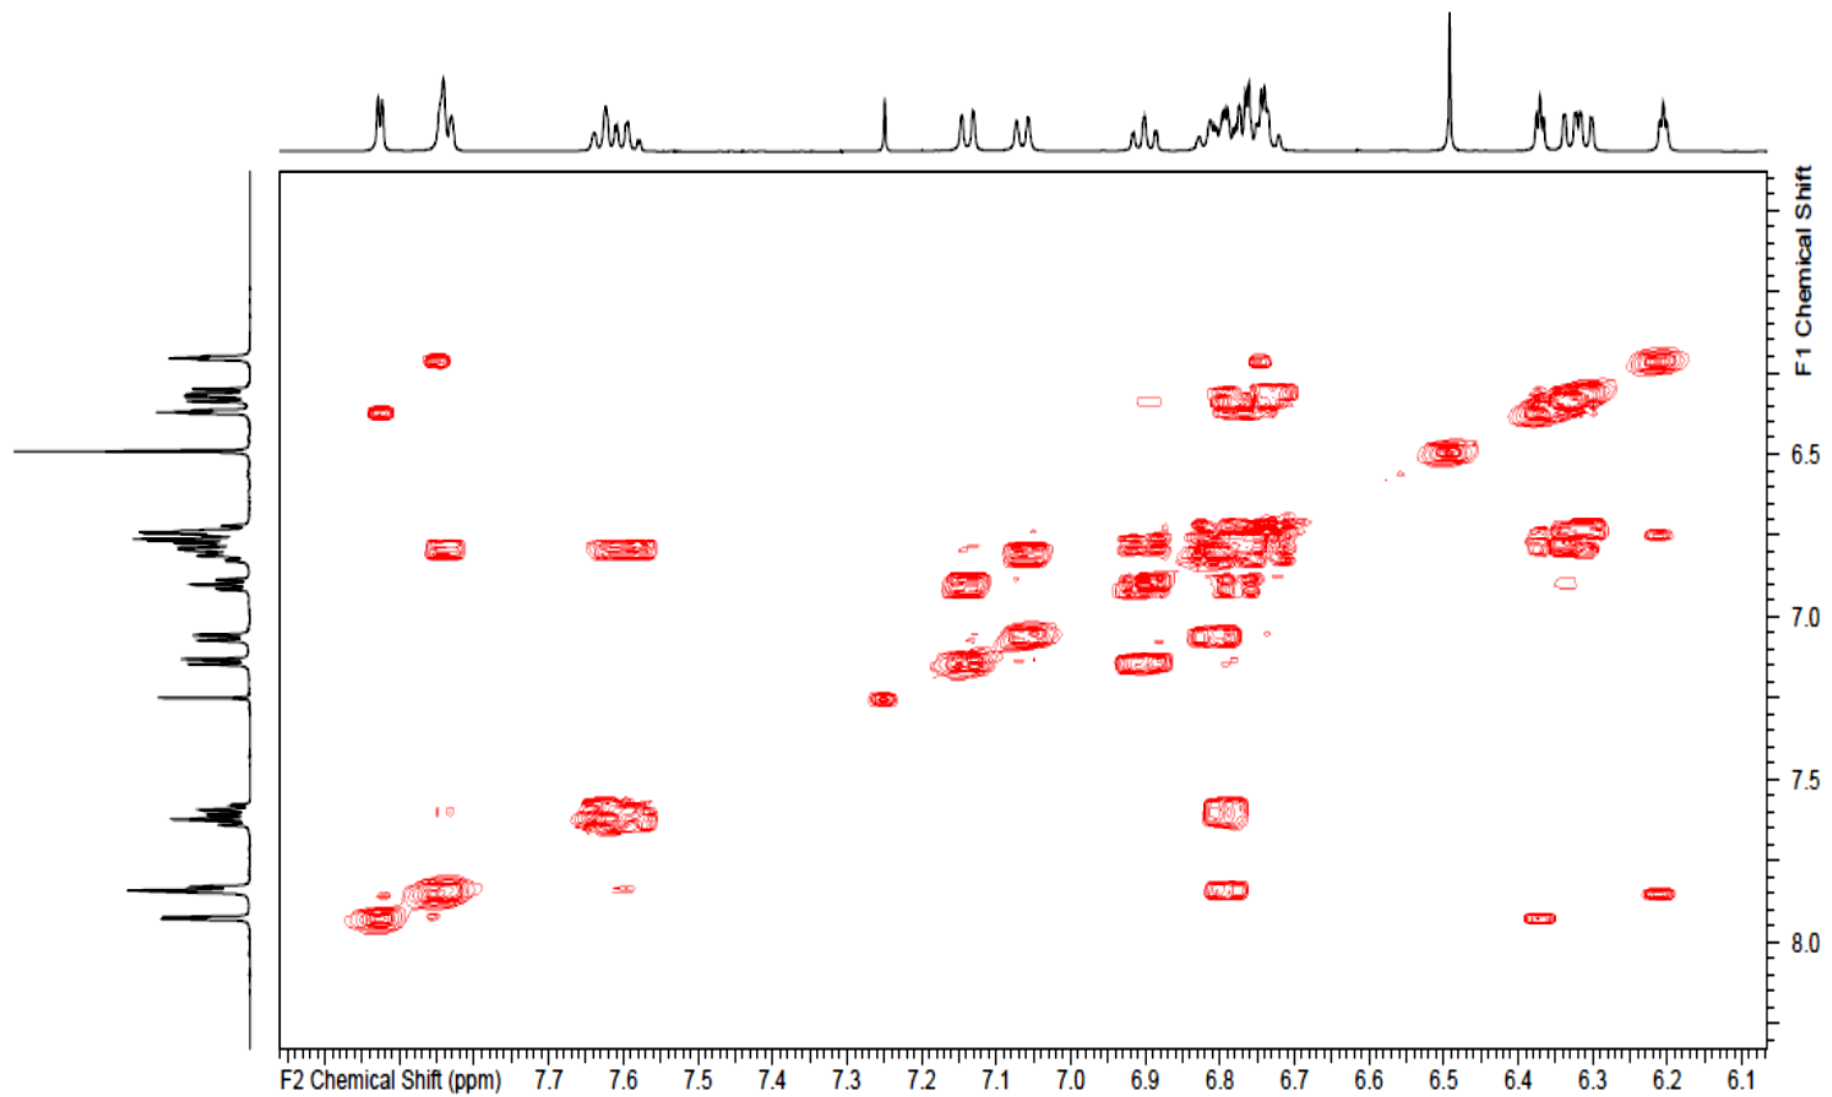

Section of the NOESY spectrum of **3aL2**

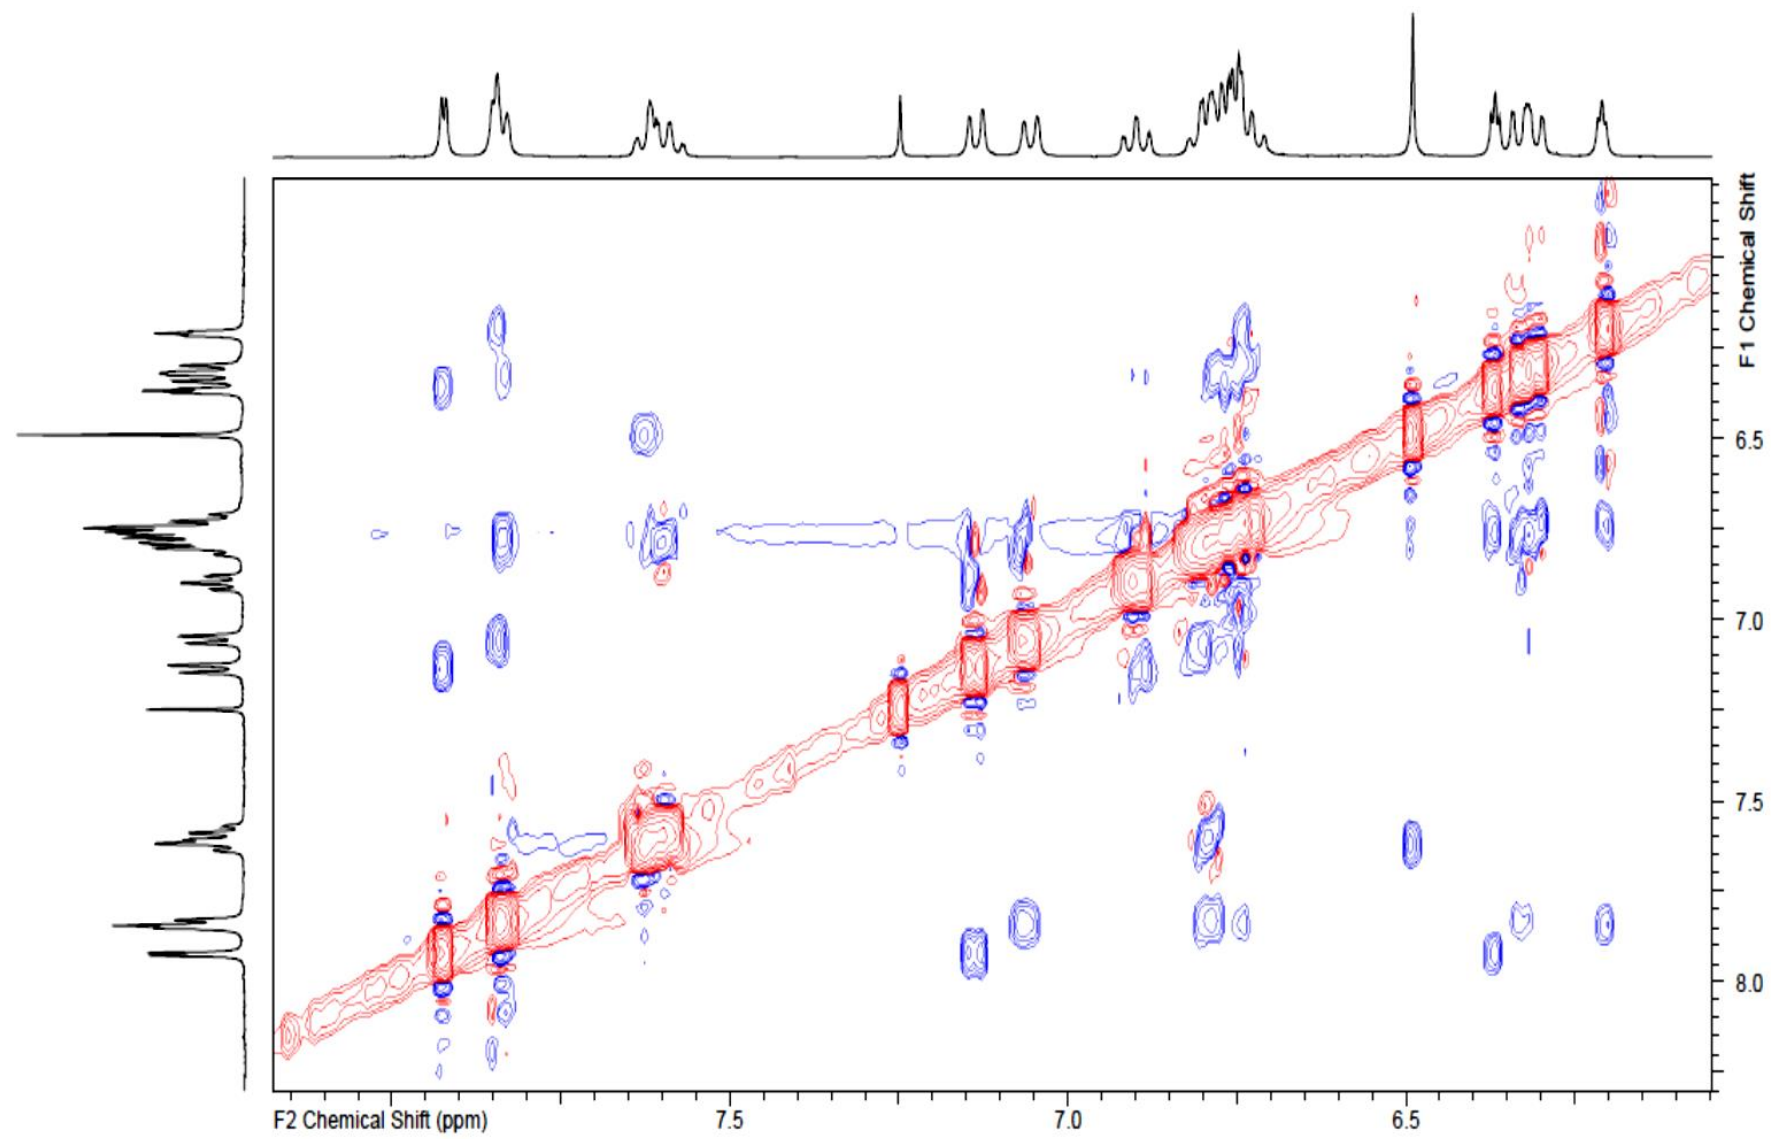

$^1\text{H}$ NMR spectrum of **3aL3**

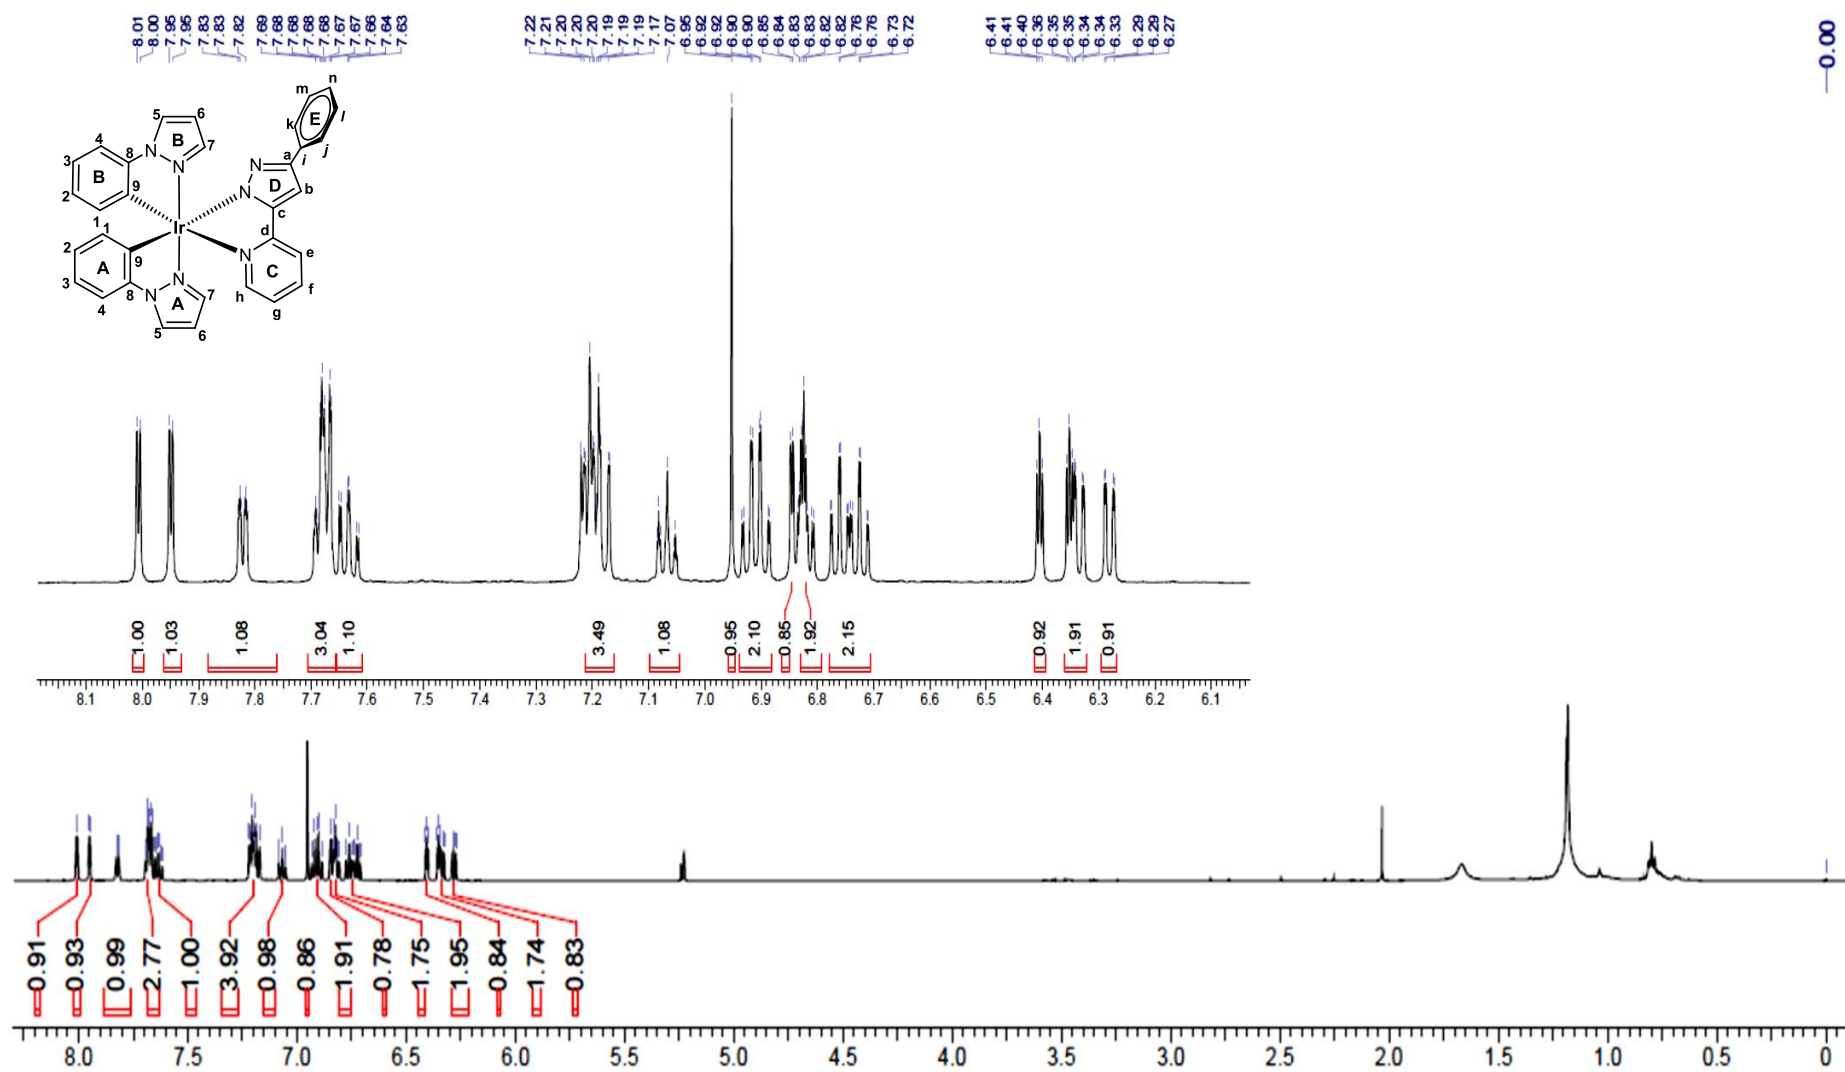

0.00

<sup>13</sup>C NMR DEPT spectrum of 3aL<sub>3</sub>

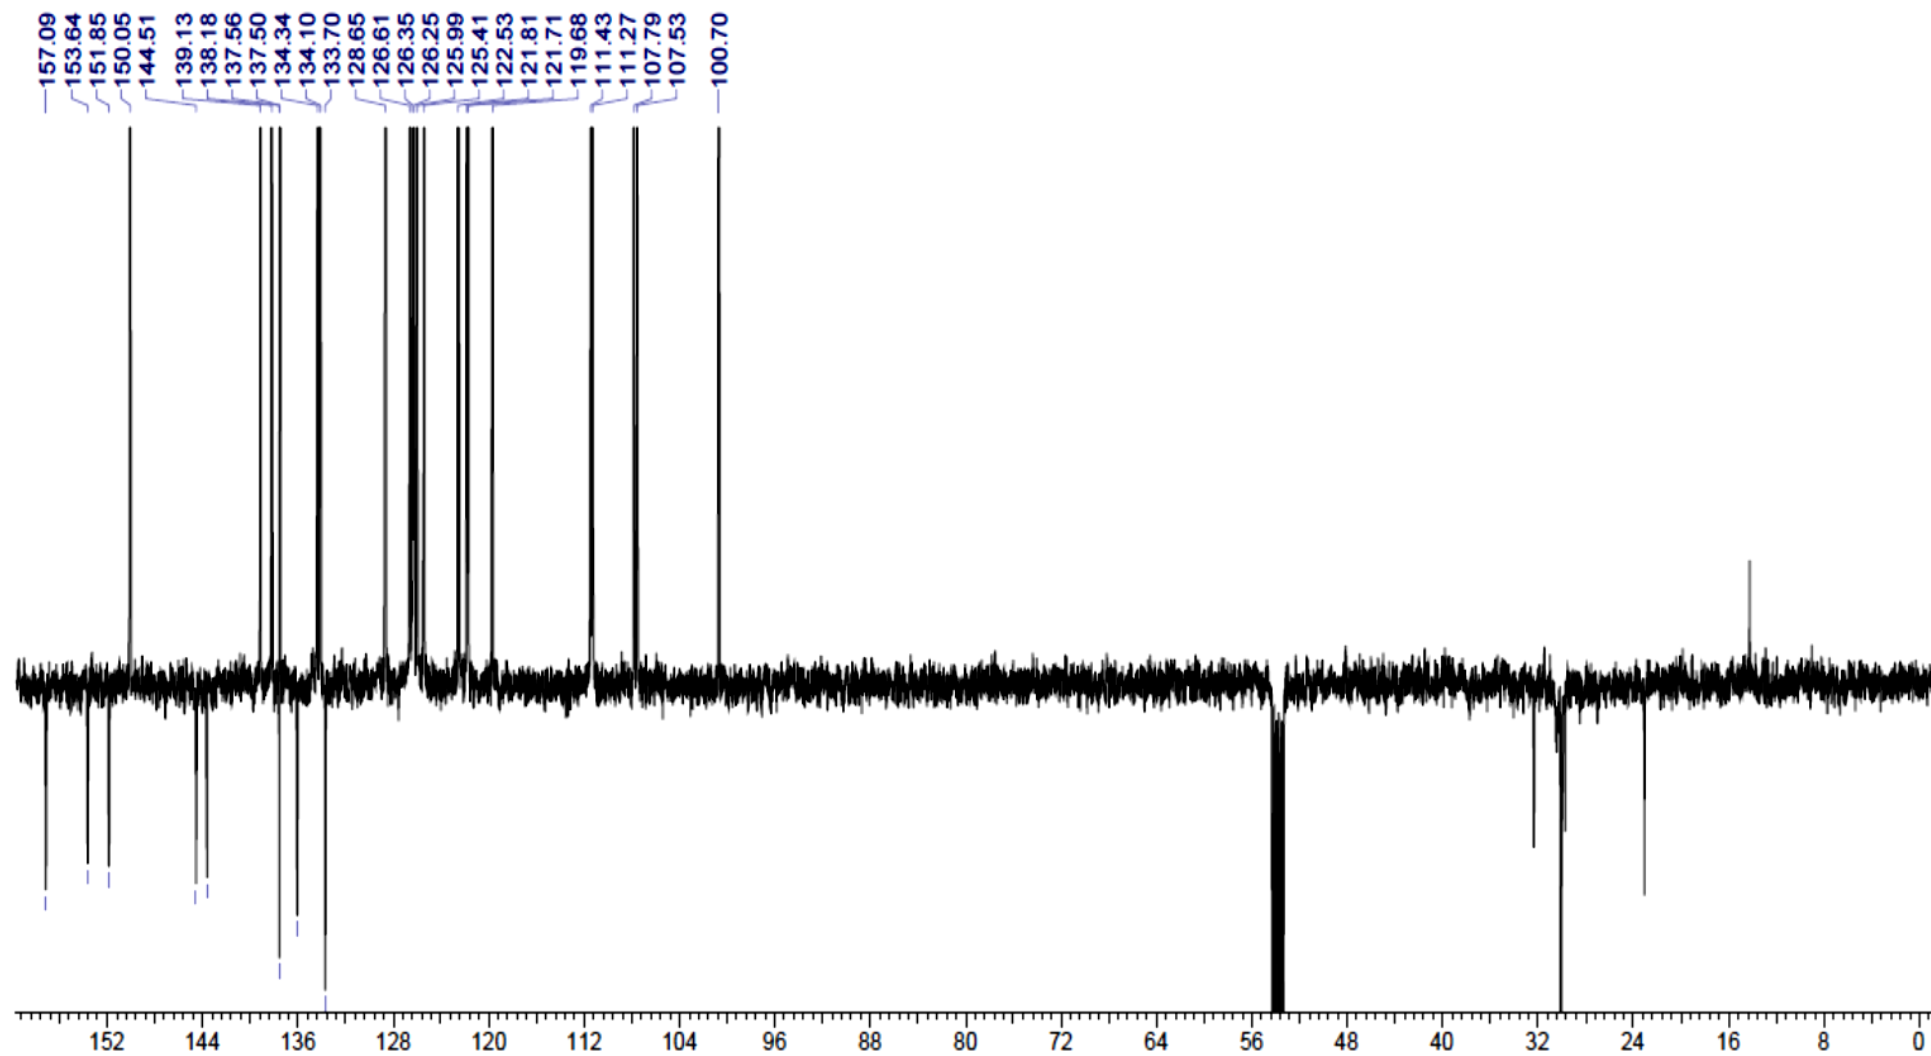

Section of  $^{13}\text{C}$  DEPT spectrum of **3aL<sub>3</sub>**

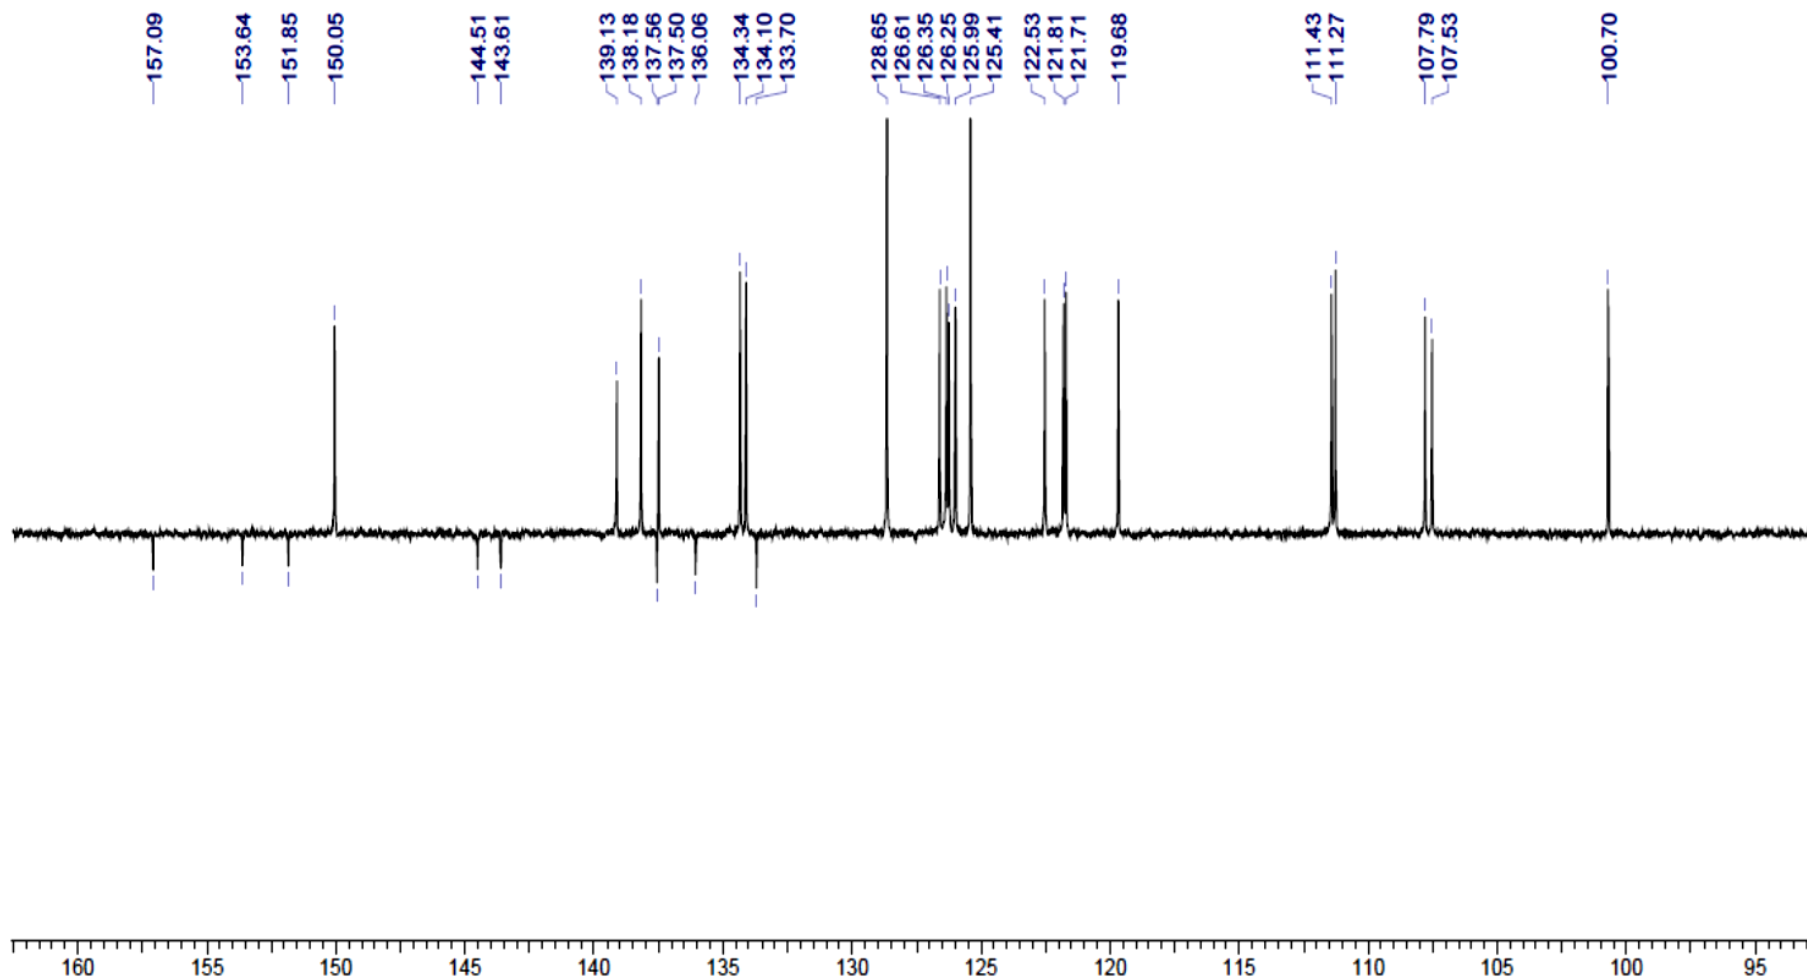



Section of the TOCSY spectrum of **3aL3**

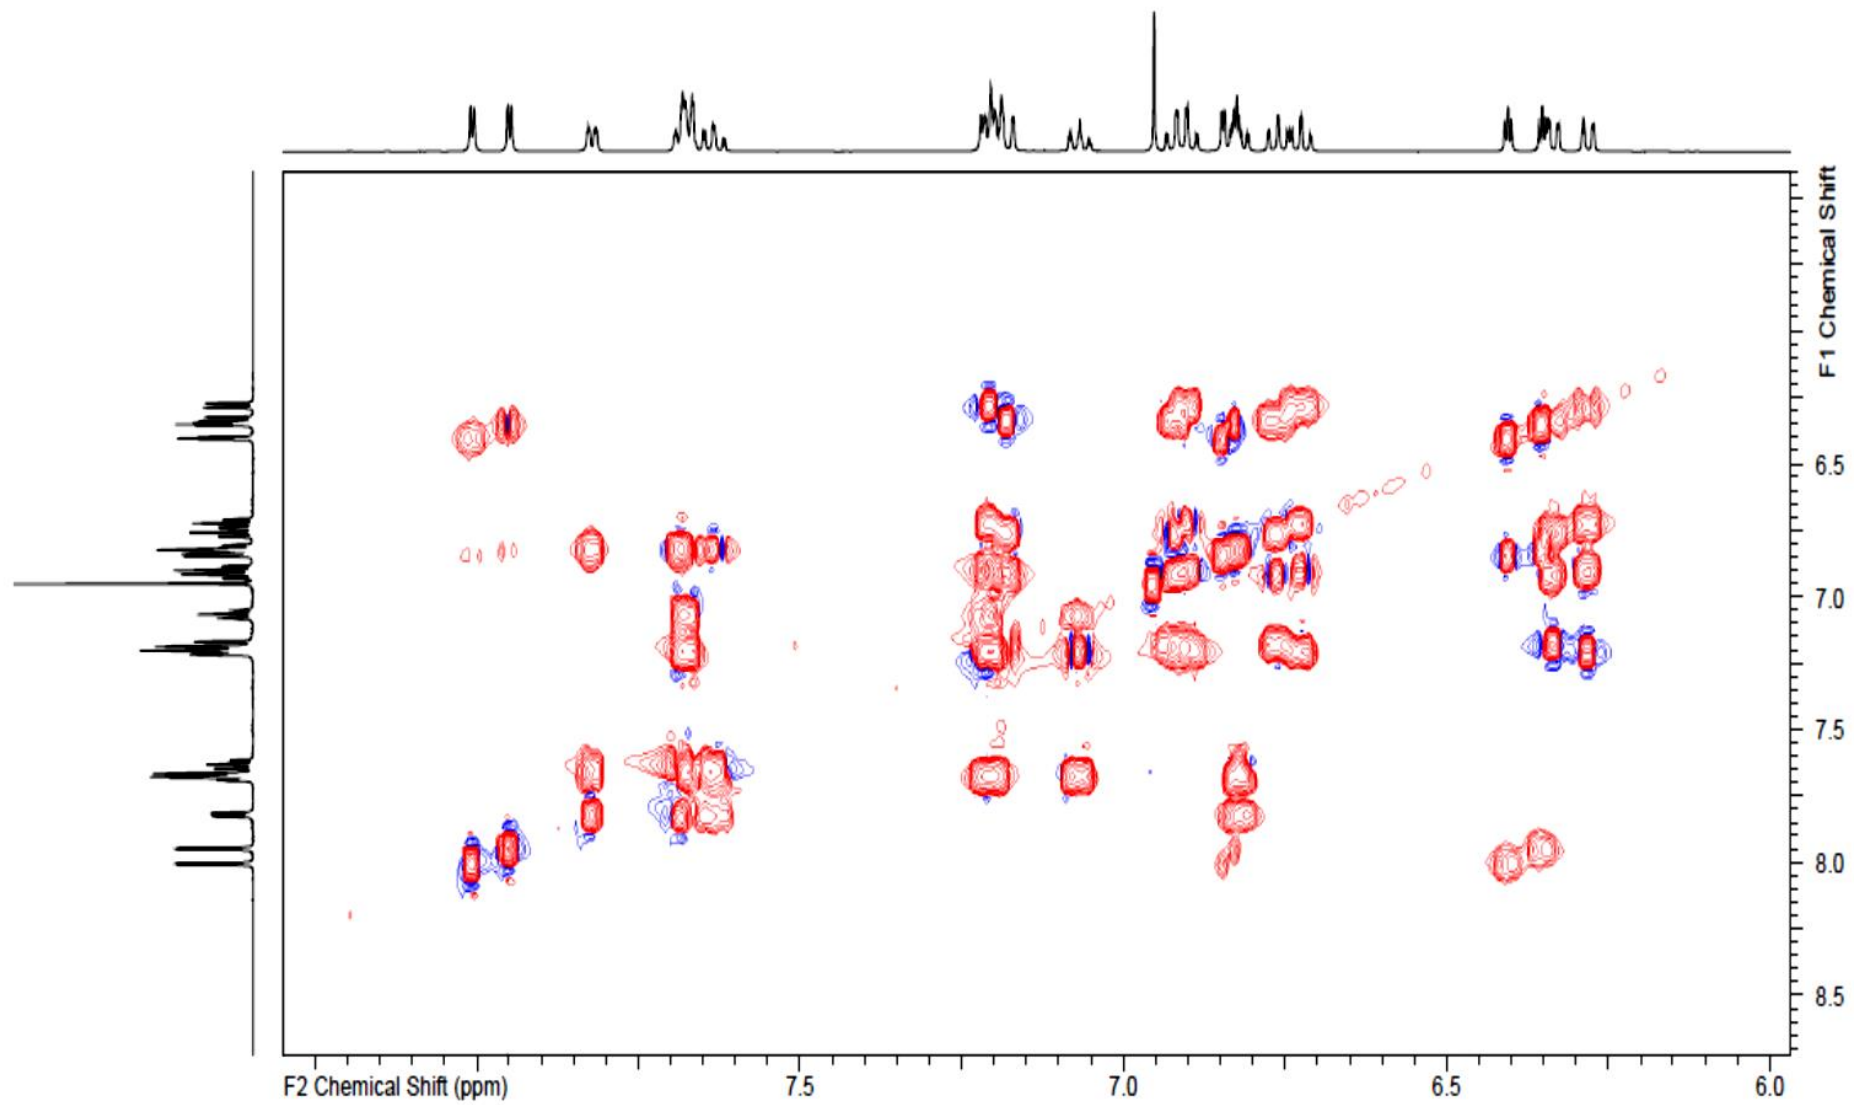

Section of the COSY spectrum of **3aL<sub>3</sub>**

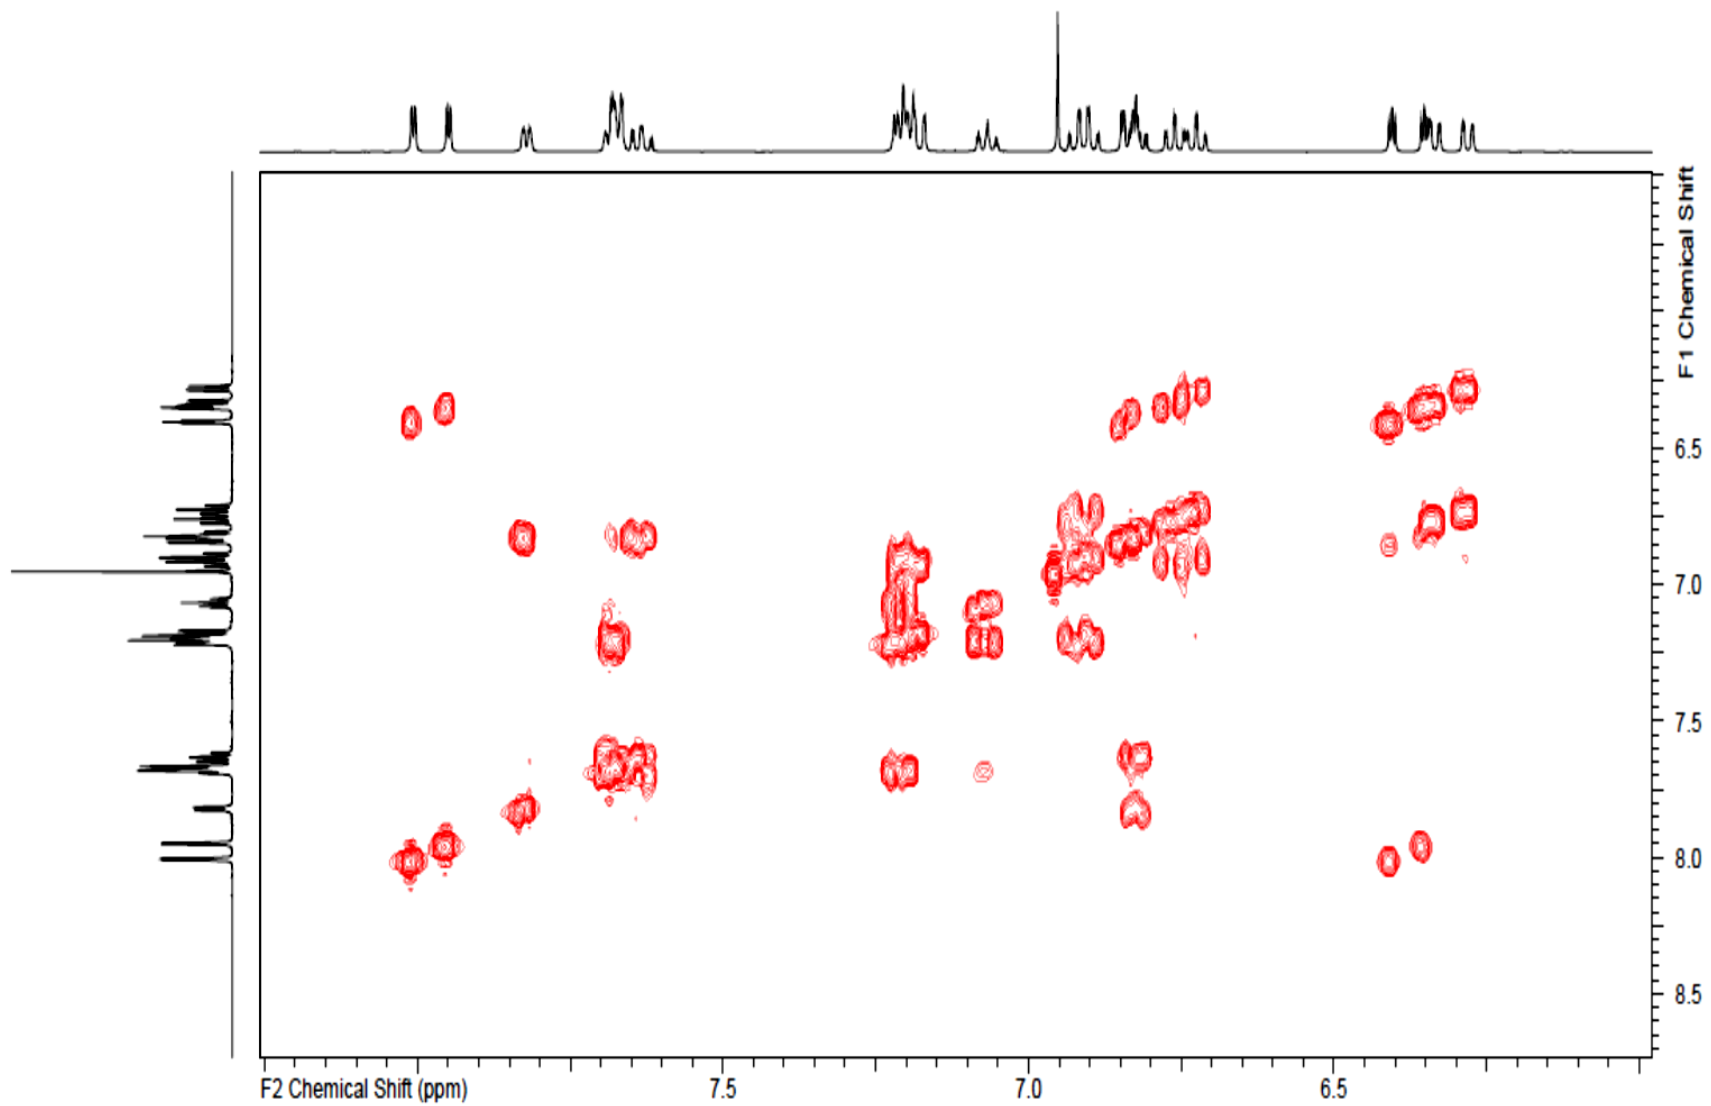

Section of the NOESY spectrum of **3aL3**

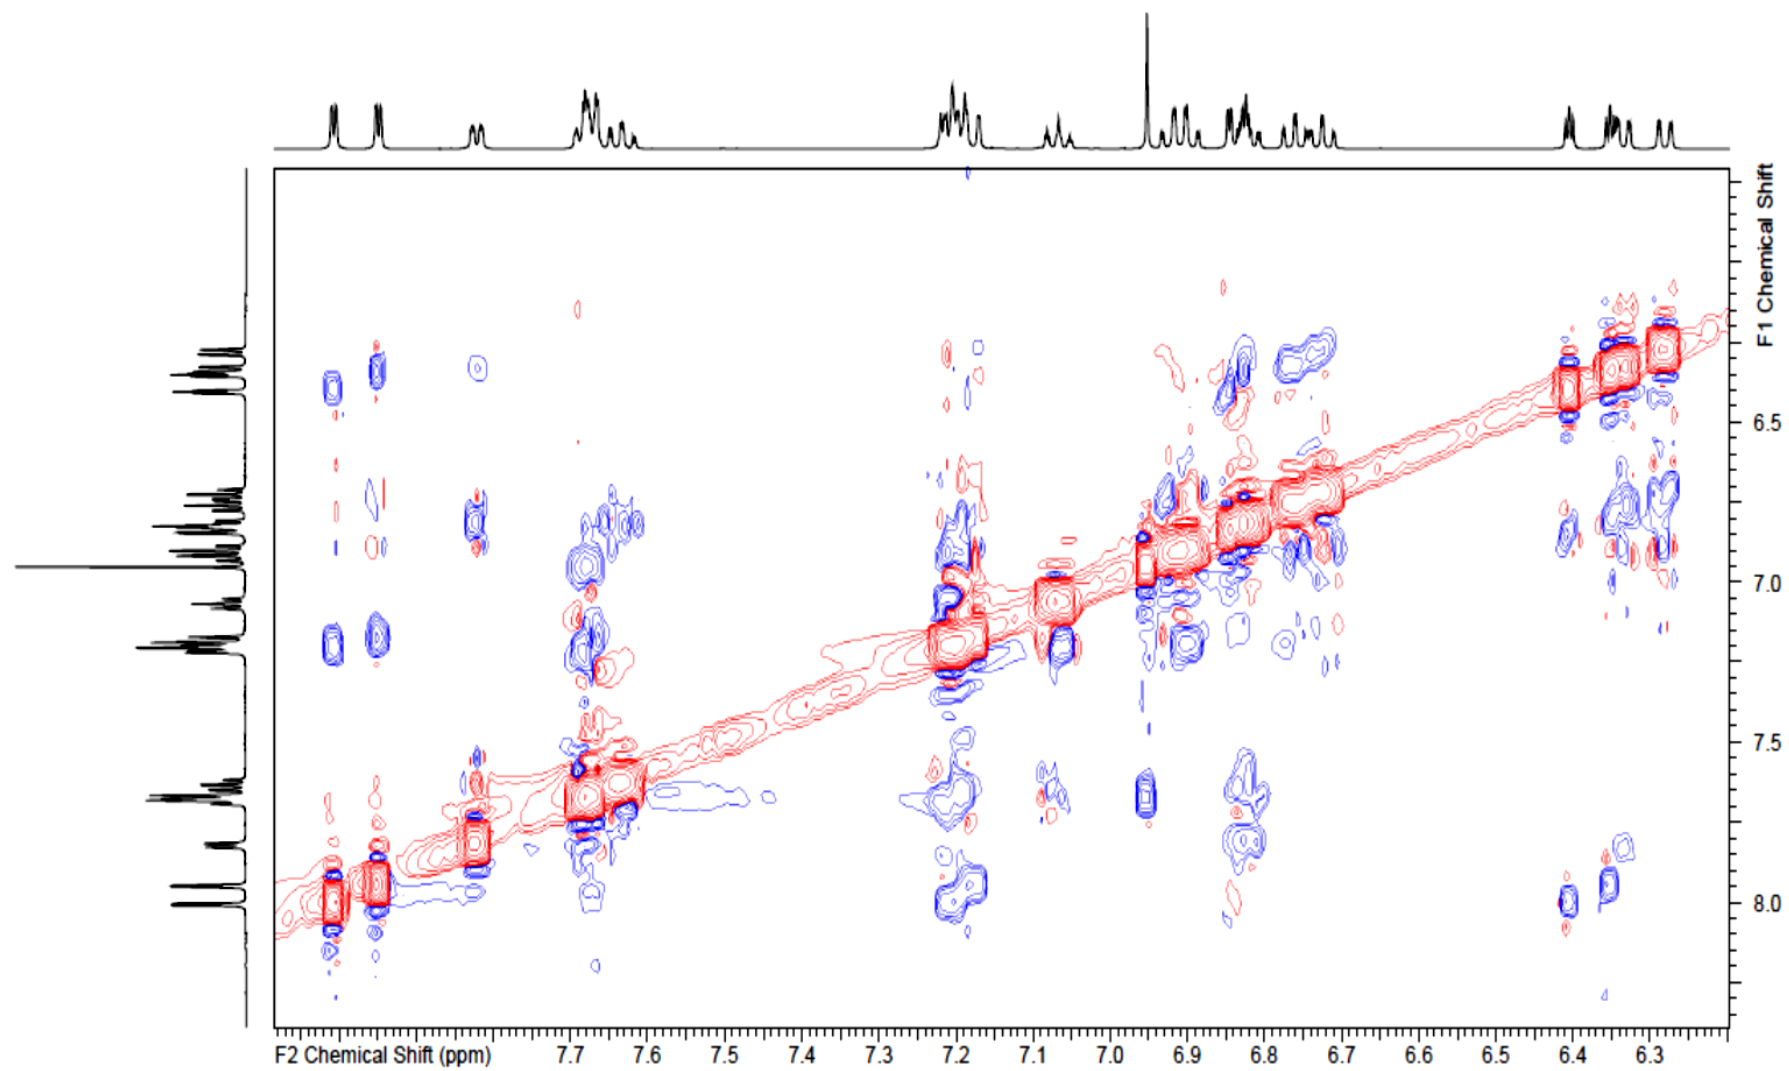

<sup>1</sup>H NMR spectrum of **3bL1**

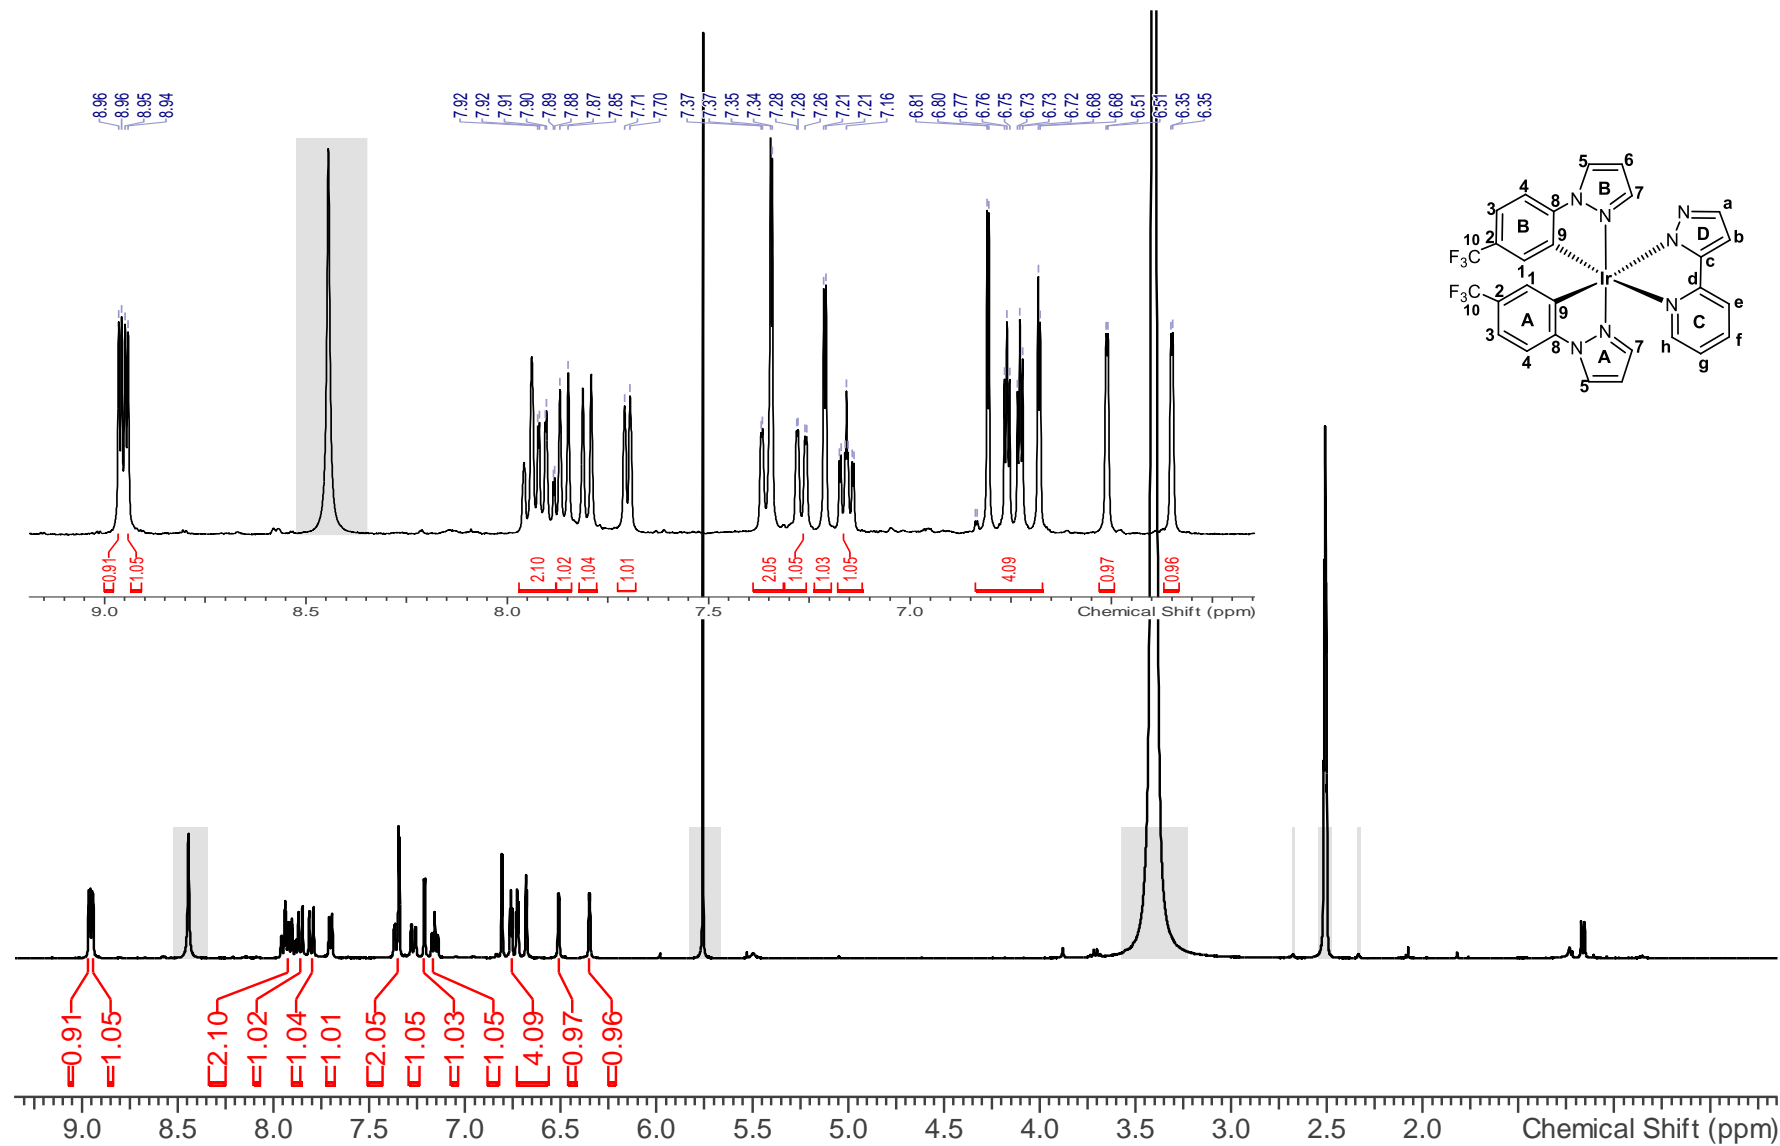

HC(O)NH<sub>2</sub> at 8.4 ppm is an impurity

<sup>13</sup>C DEPT NMR spectrum of **3bL<sub>1</sub>**

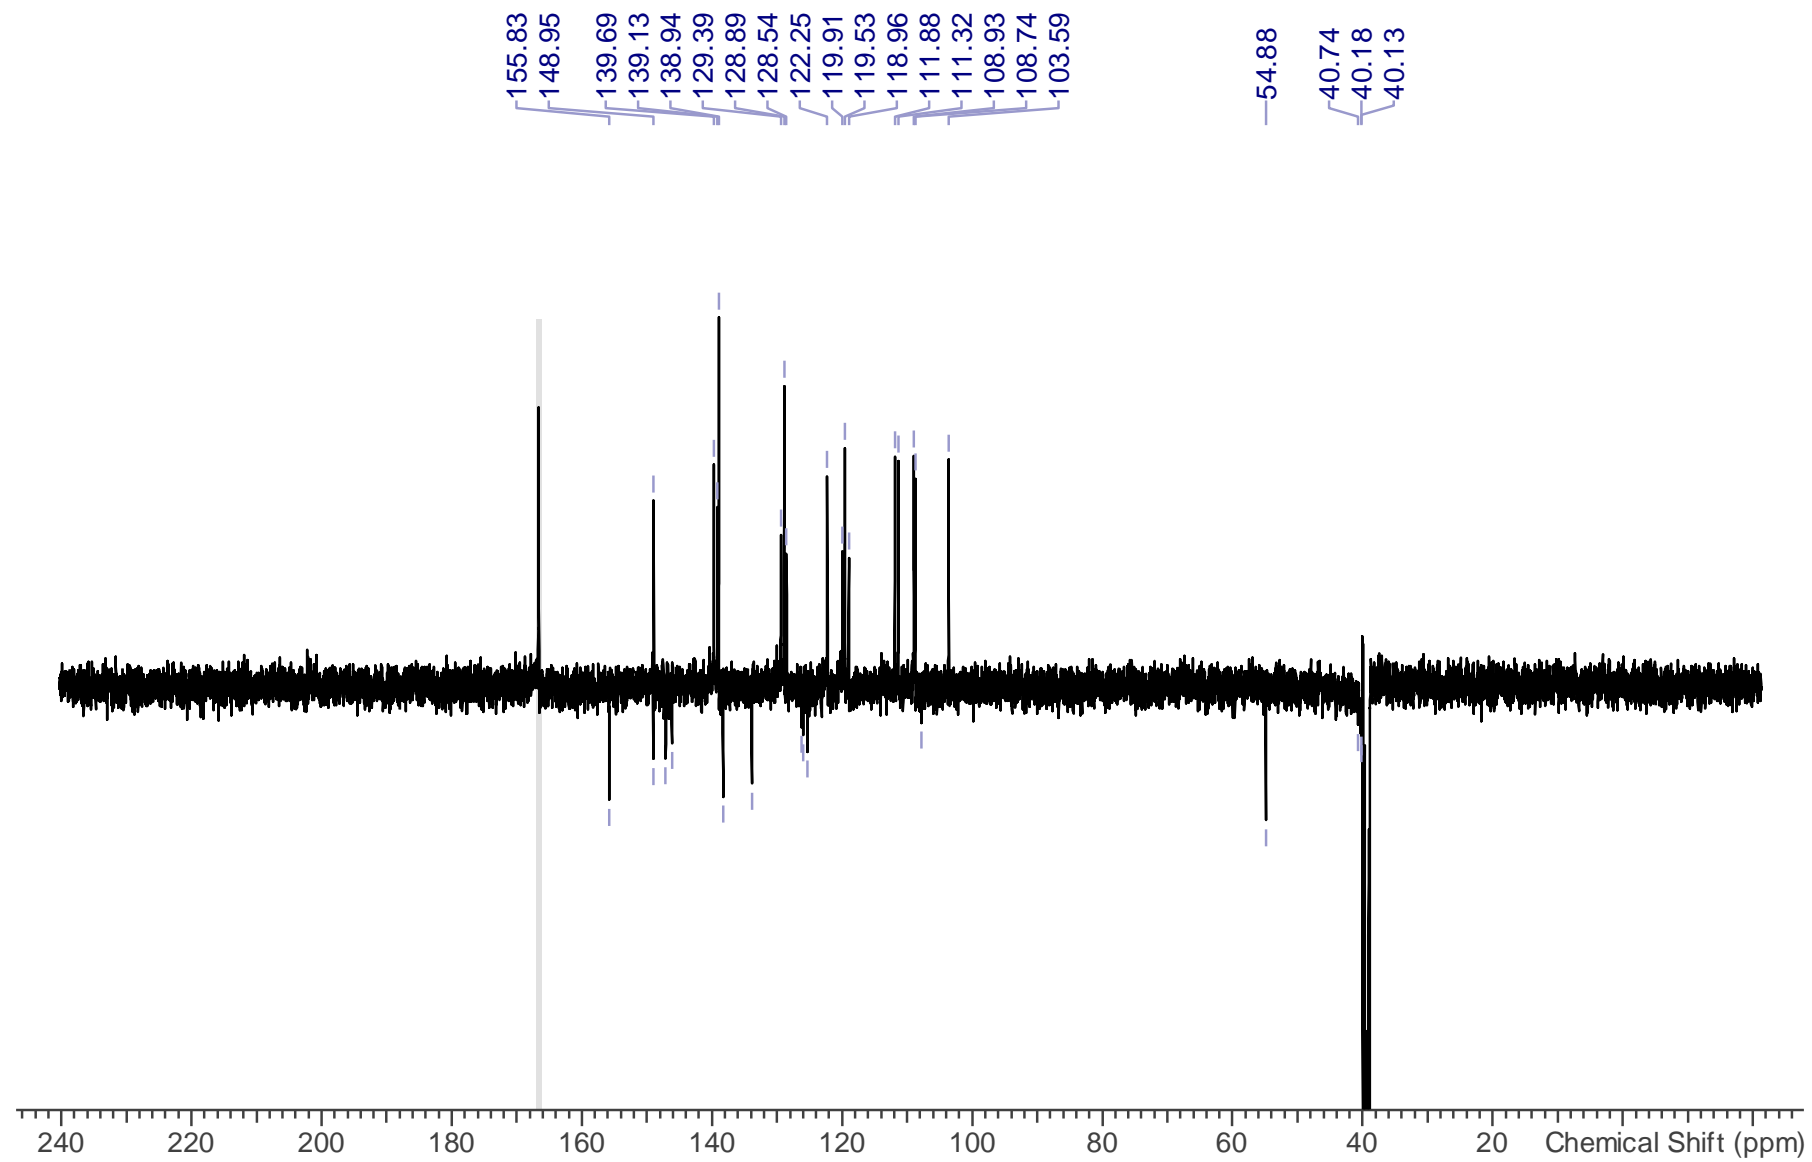

HC(O)NH<sub>2</sub> at 166 ppm is an impurity

Section of  $^{13}\text{C}$  DEPT NMR spectrum of **3bL<sub>1</sub>**

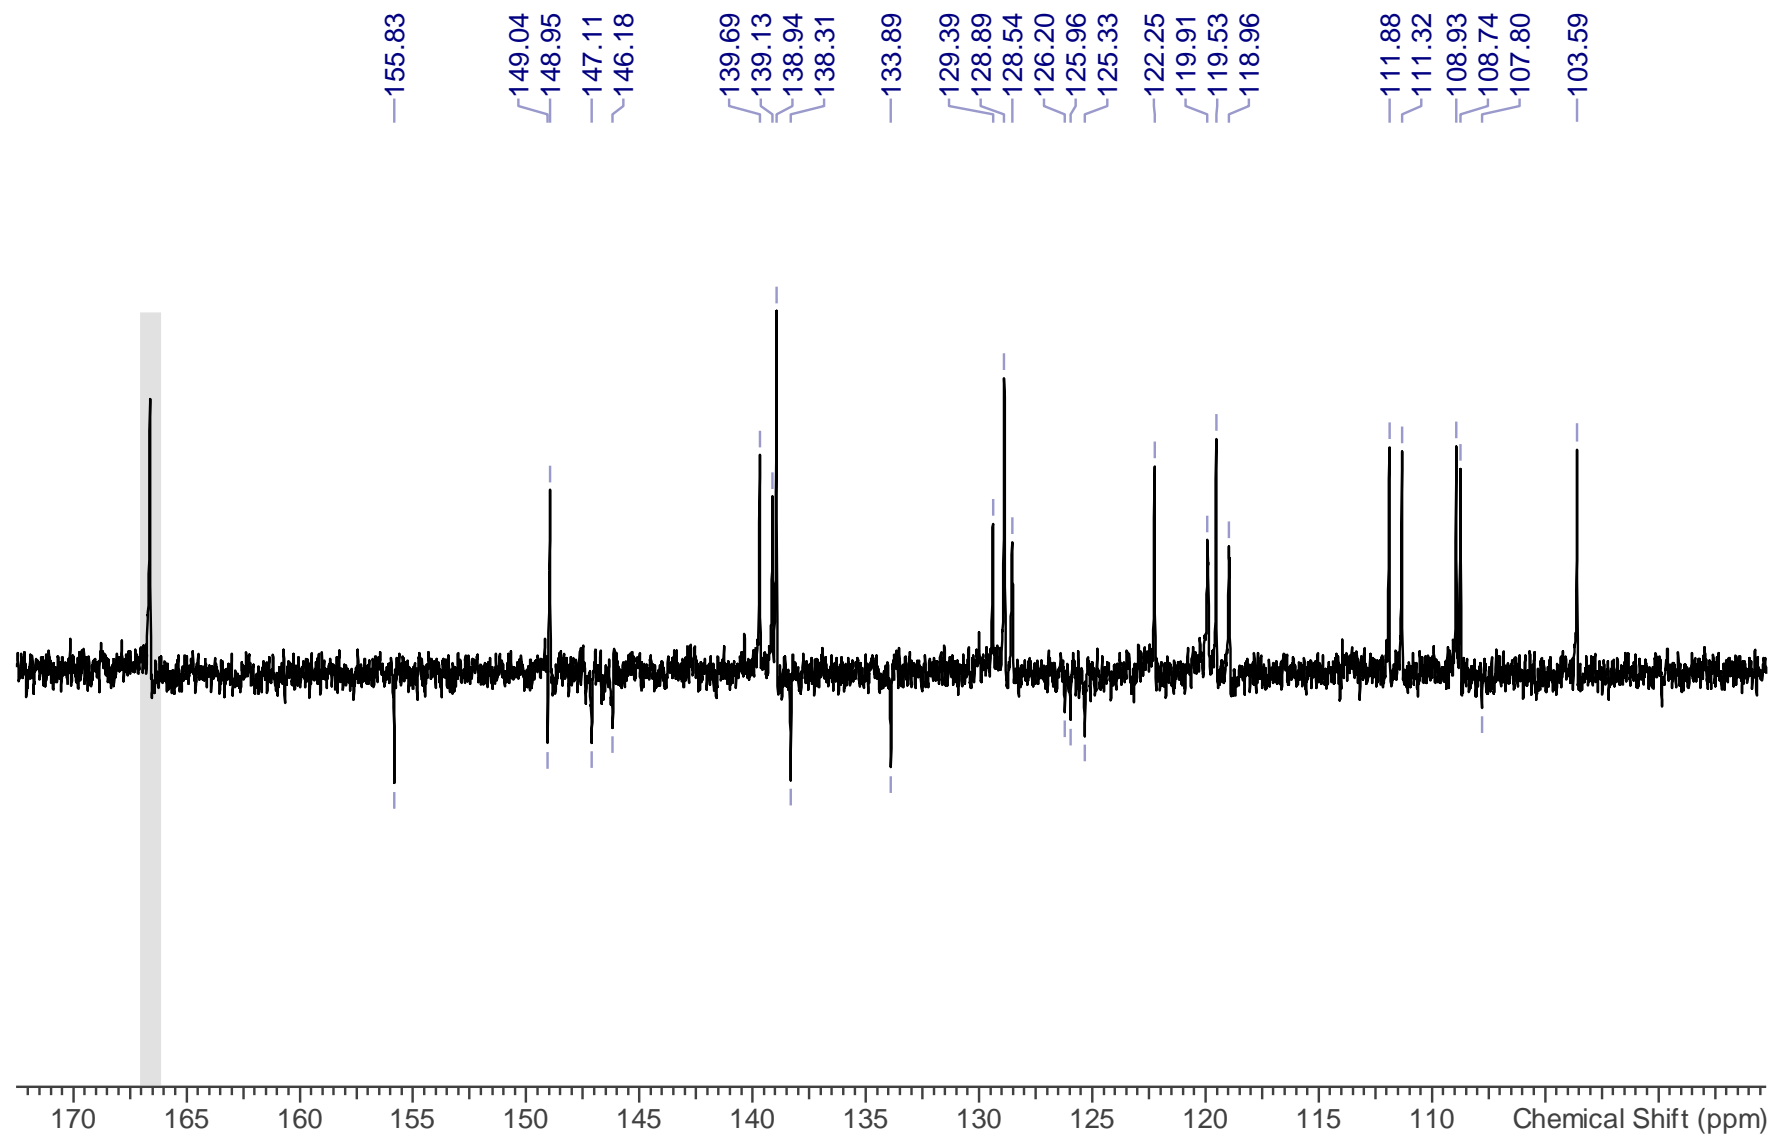

Section of the TOCSY spectrum of **3bL<sub>1</sub>**

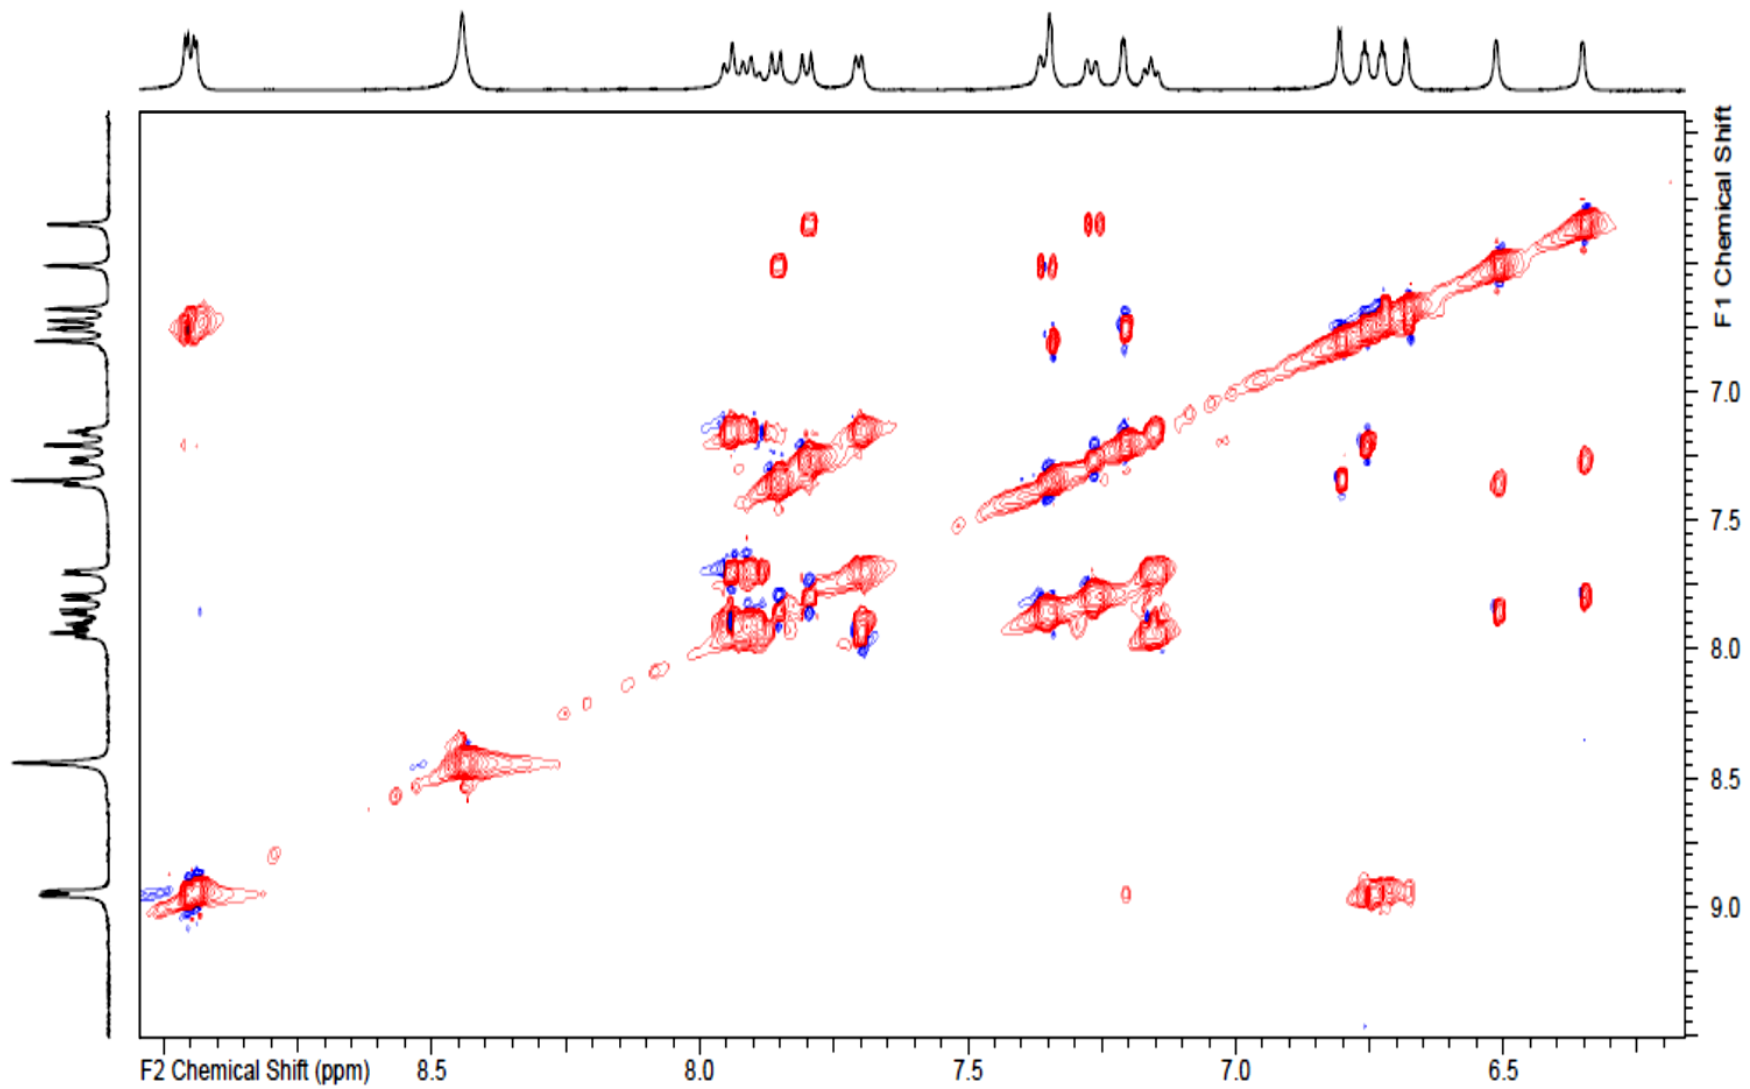

Section of the COSY spectrum of **3bL1**

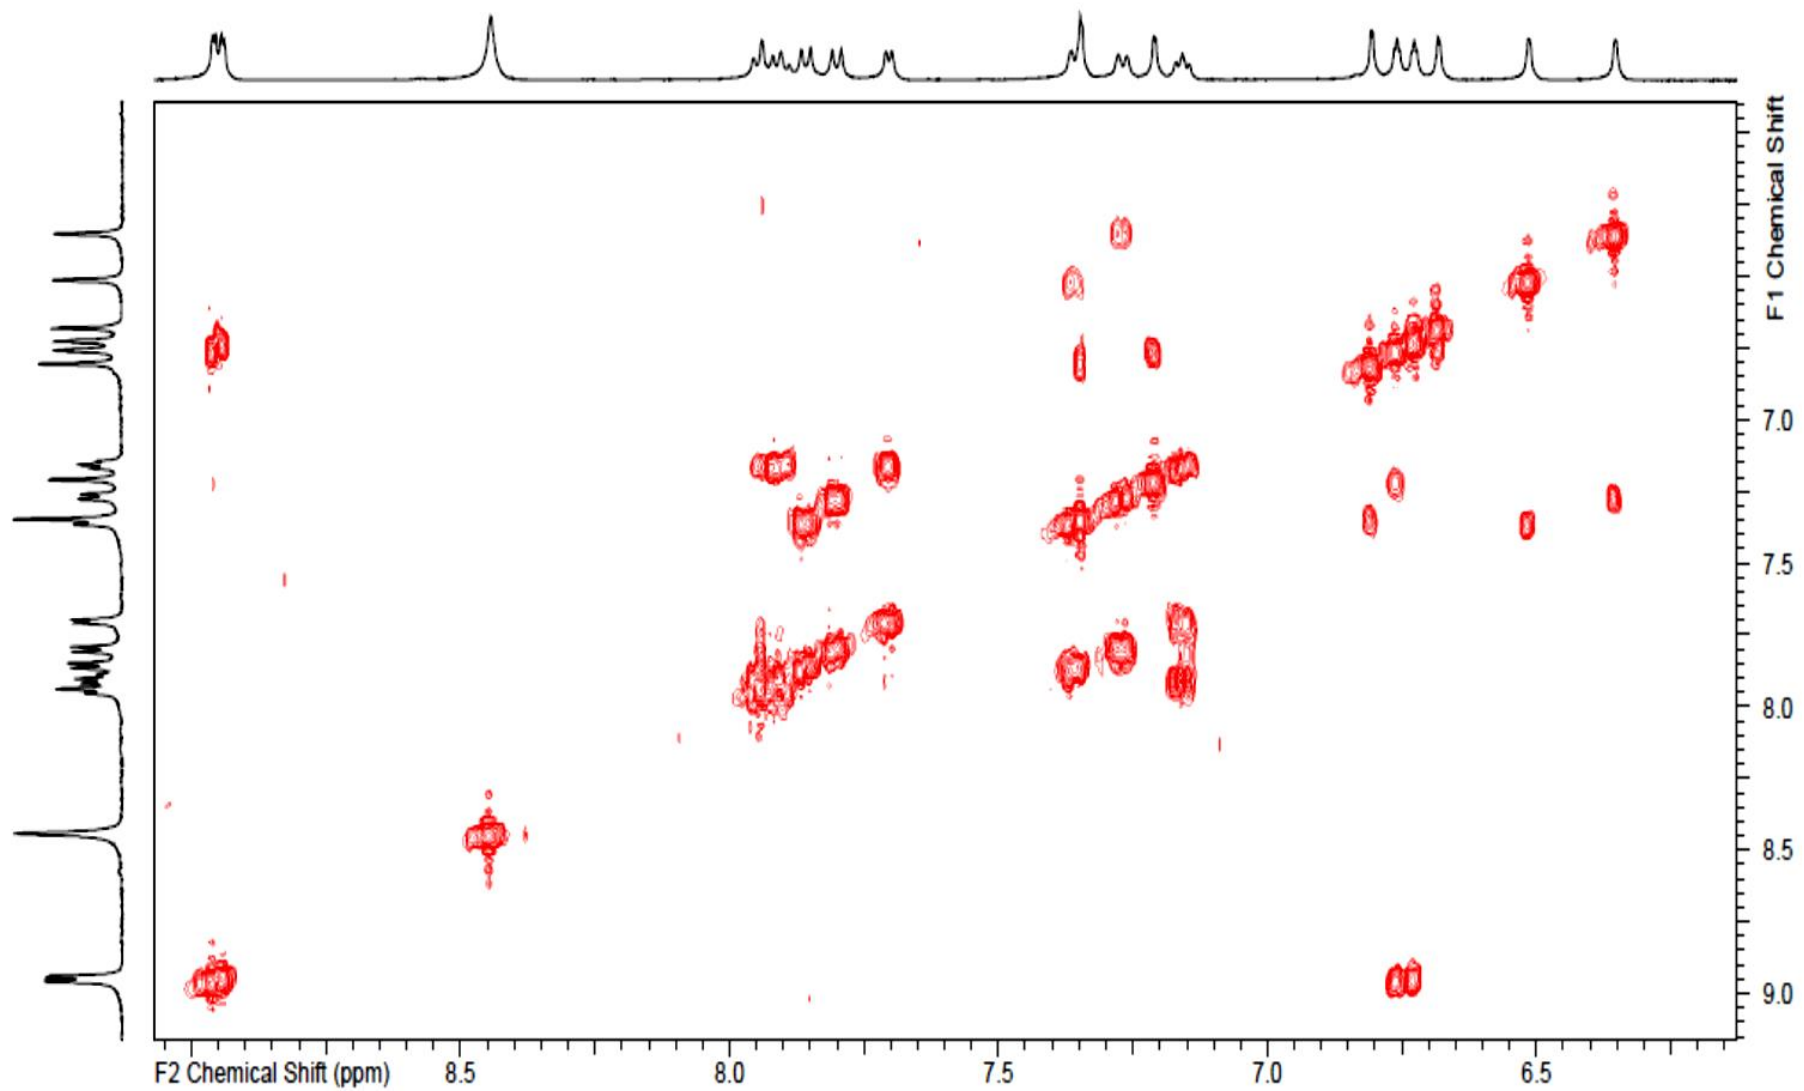



Section of the NOESY spectrum of **3bL<sub>1</sub>**

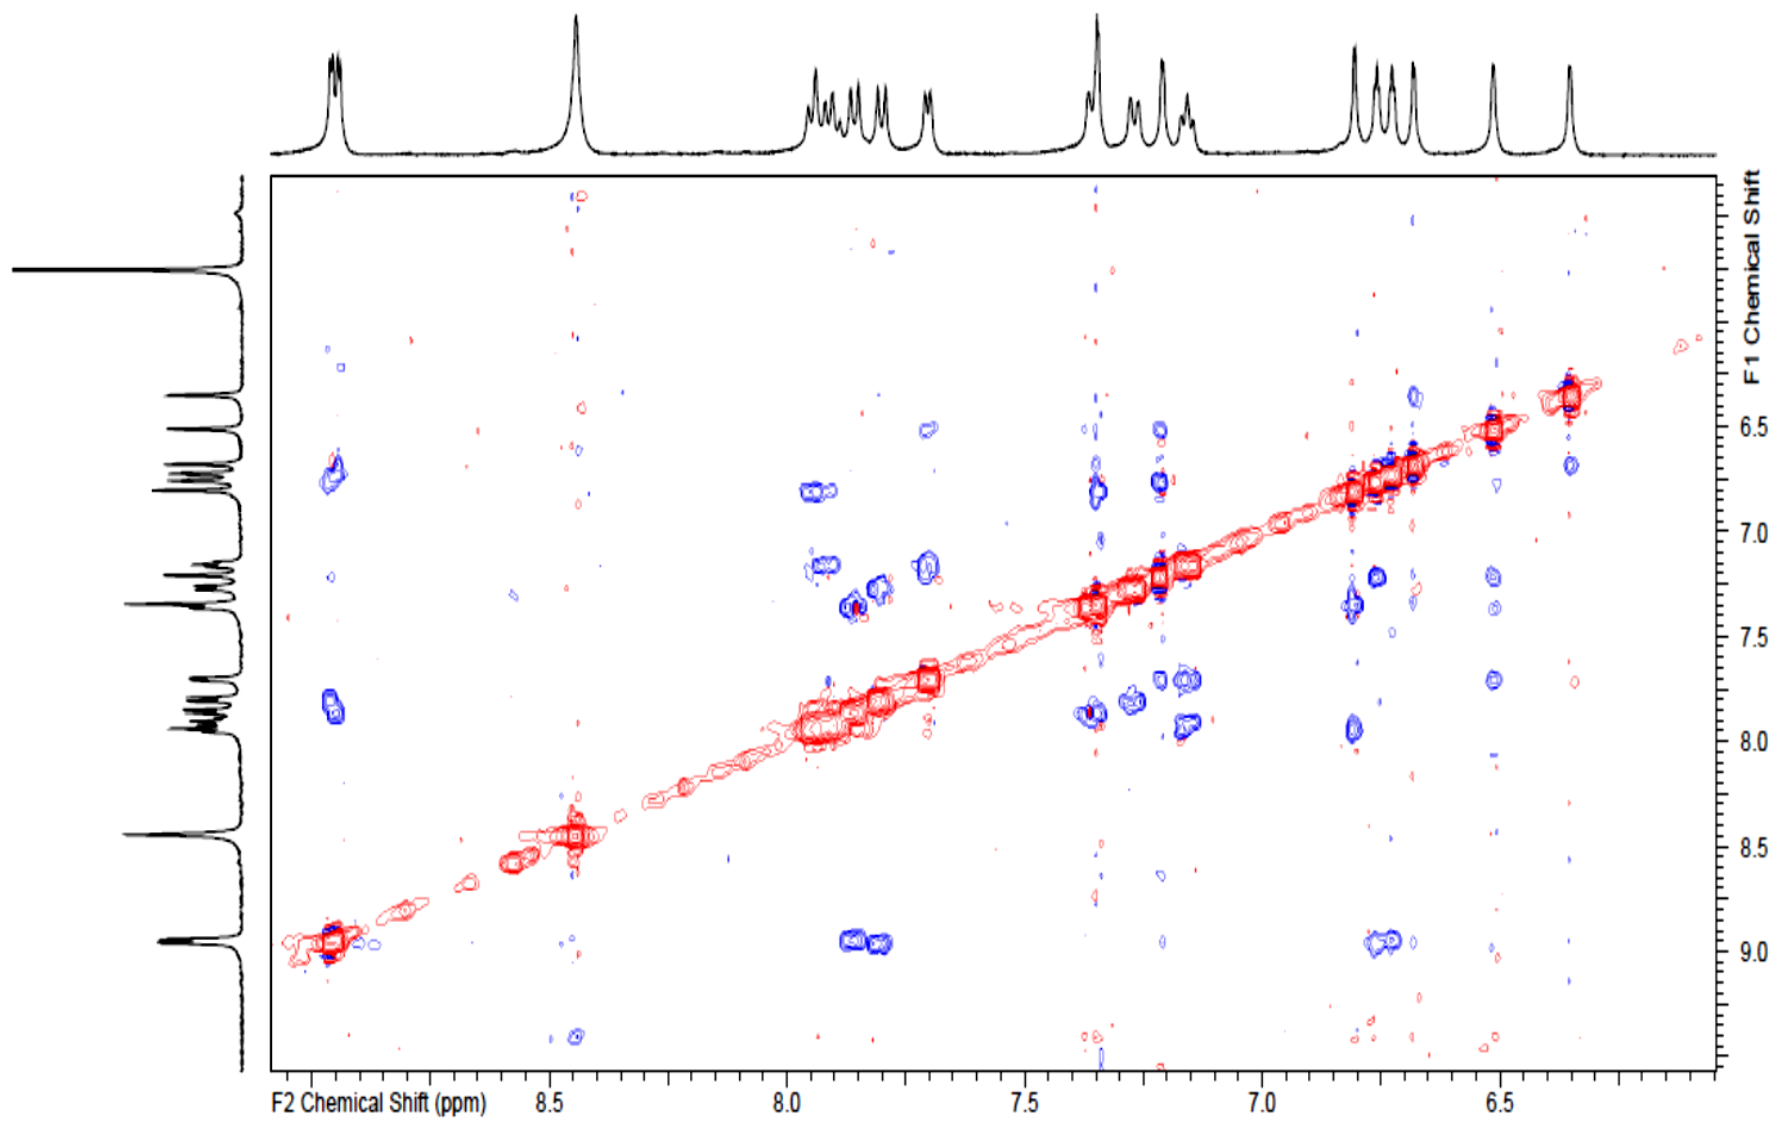

$^{19}\text{F}$  NMR spectrum of **3bL<sub>1</sub>**

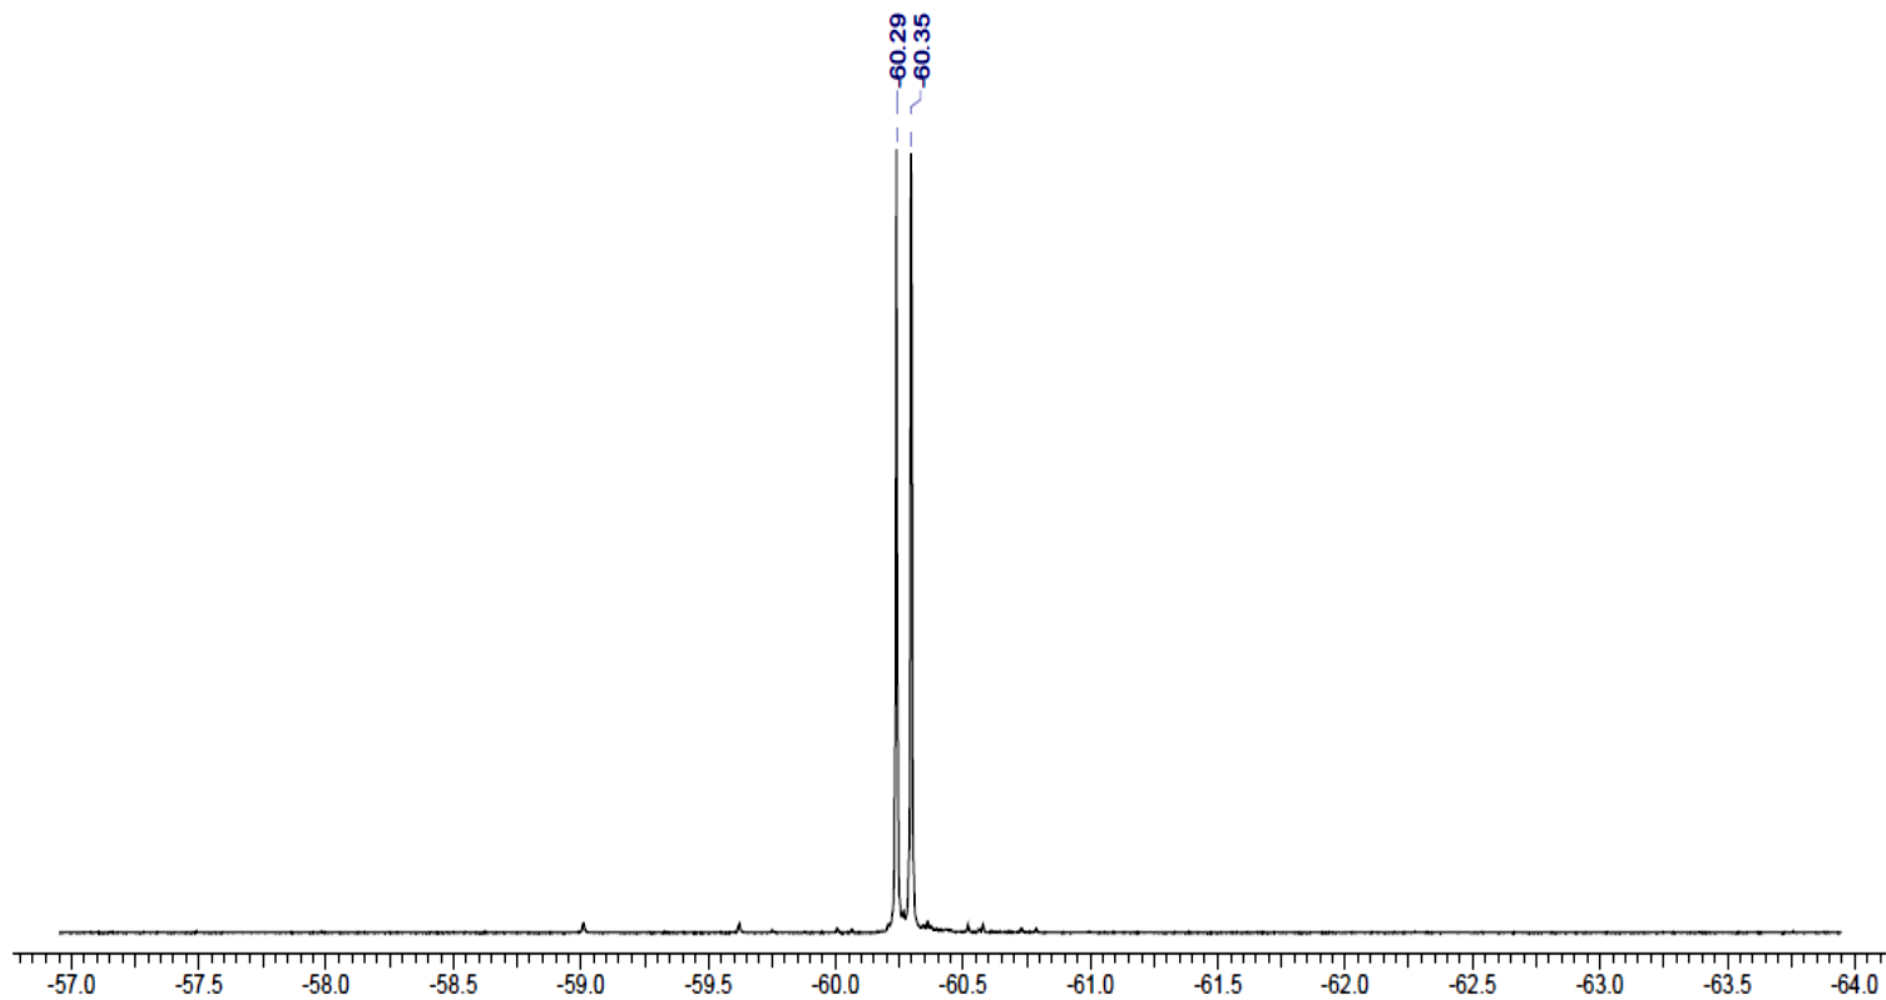

$^1\text{H}$  NMR spectrum of **3bL<sub>2</sub>**

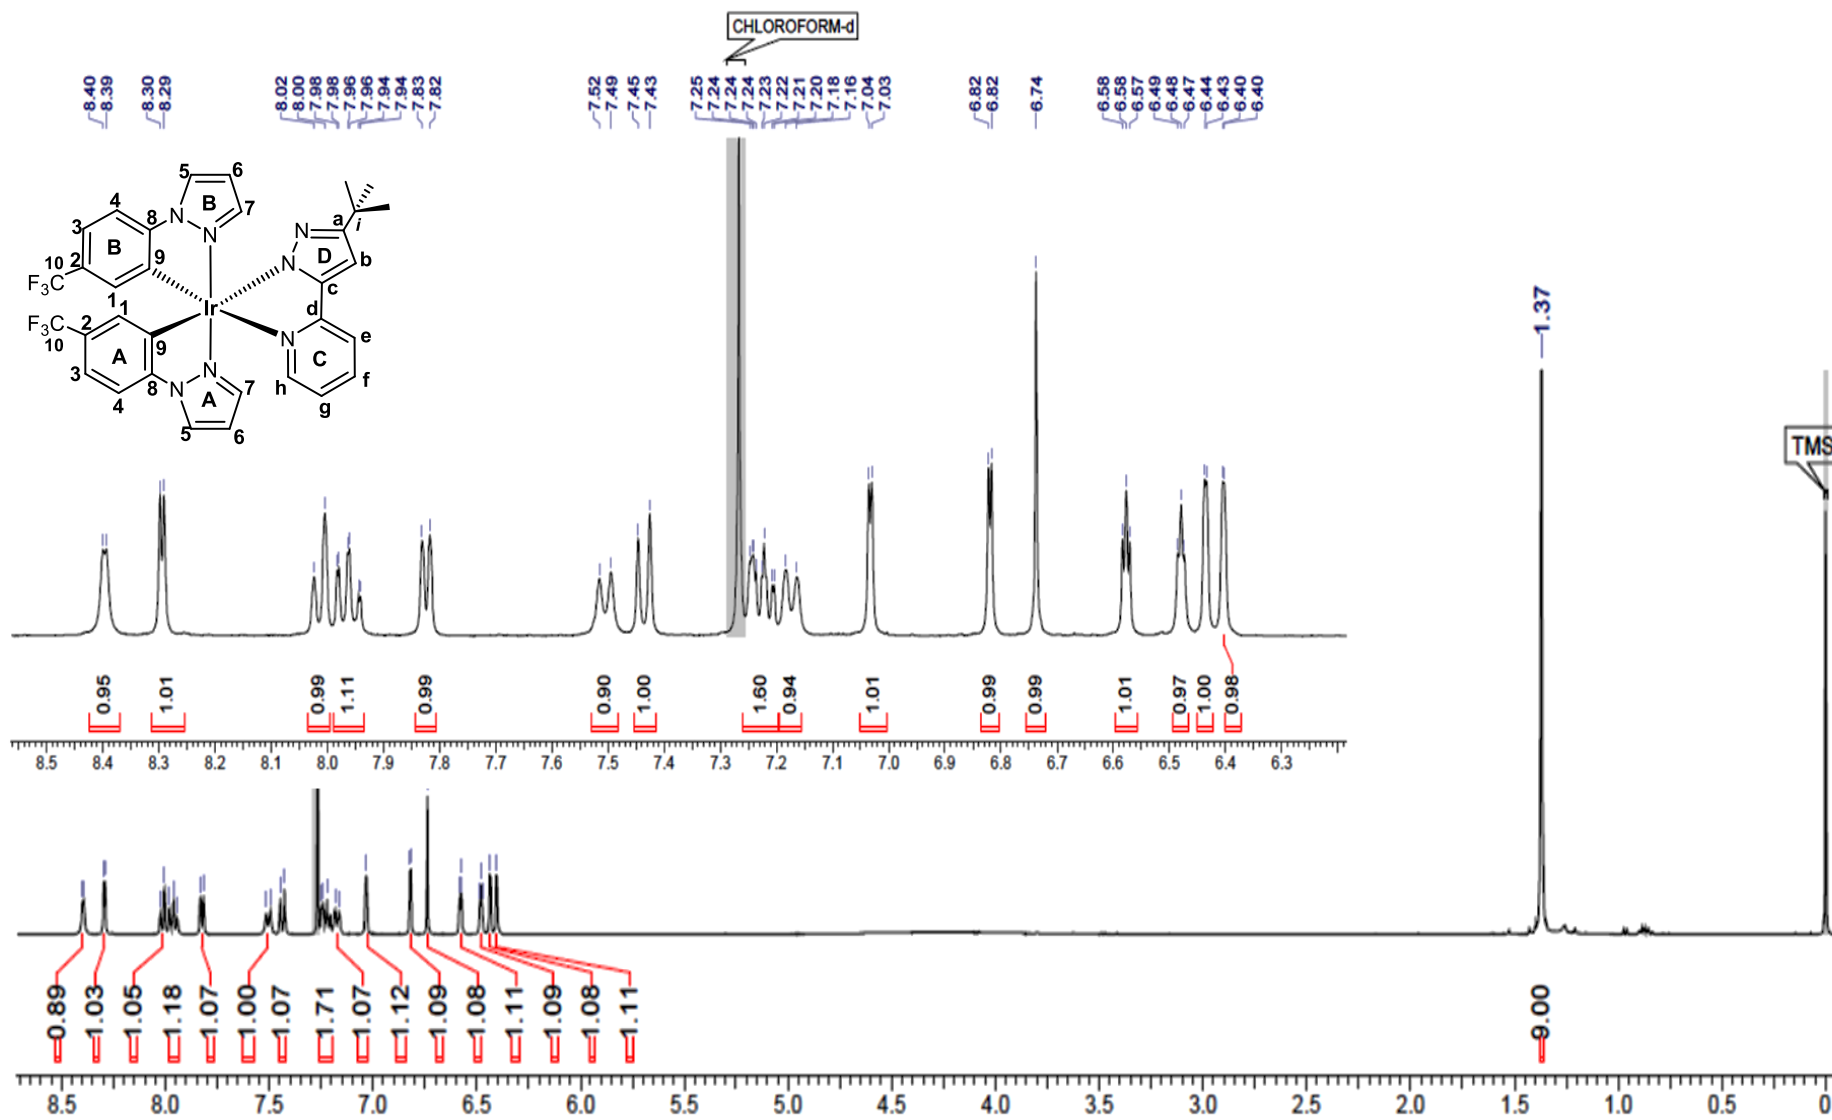

<sup>13</sup>C DEPT NMR spectrum of **3bL<sub>2</sub>**

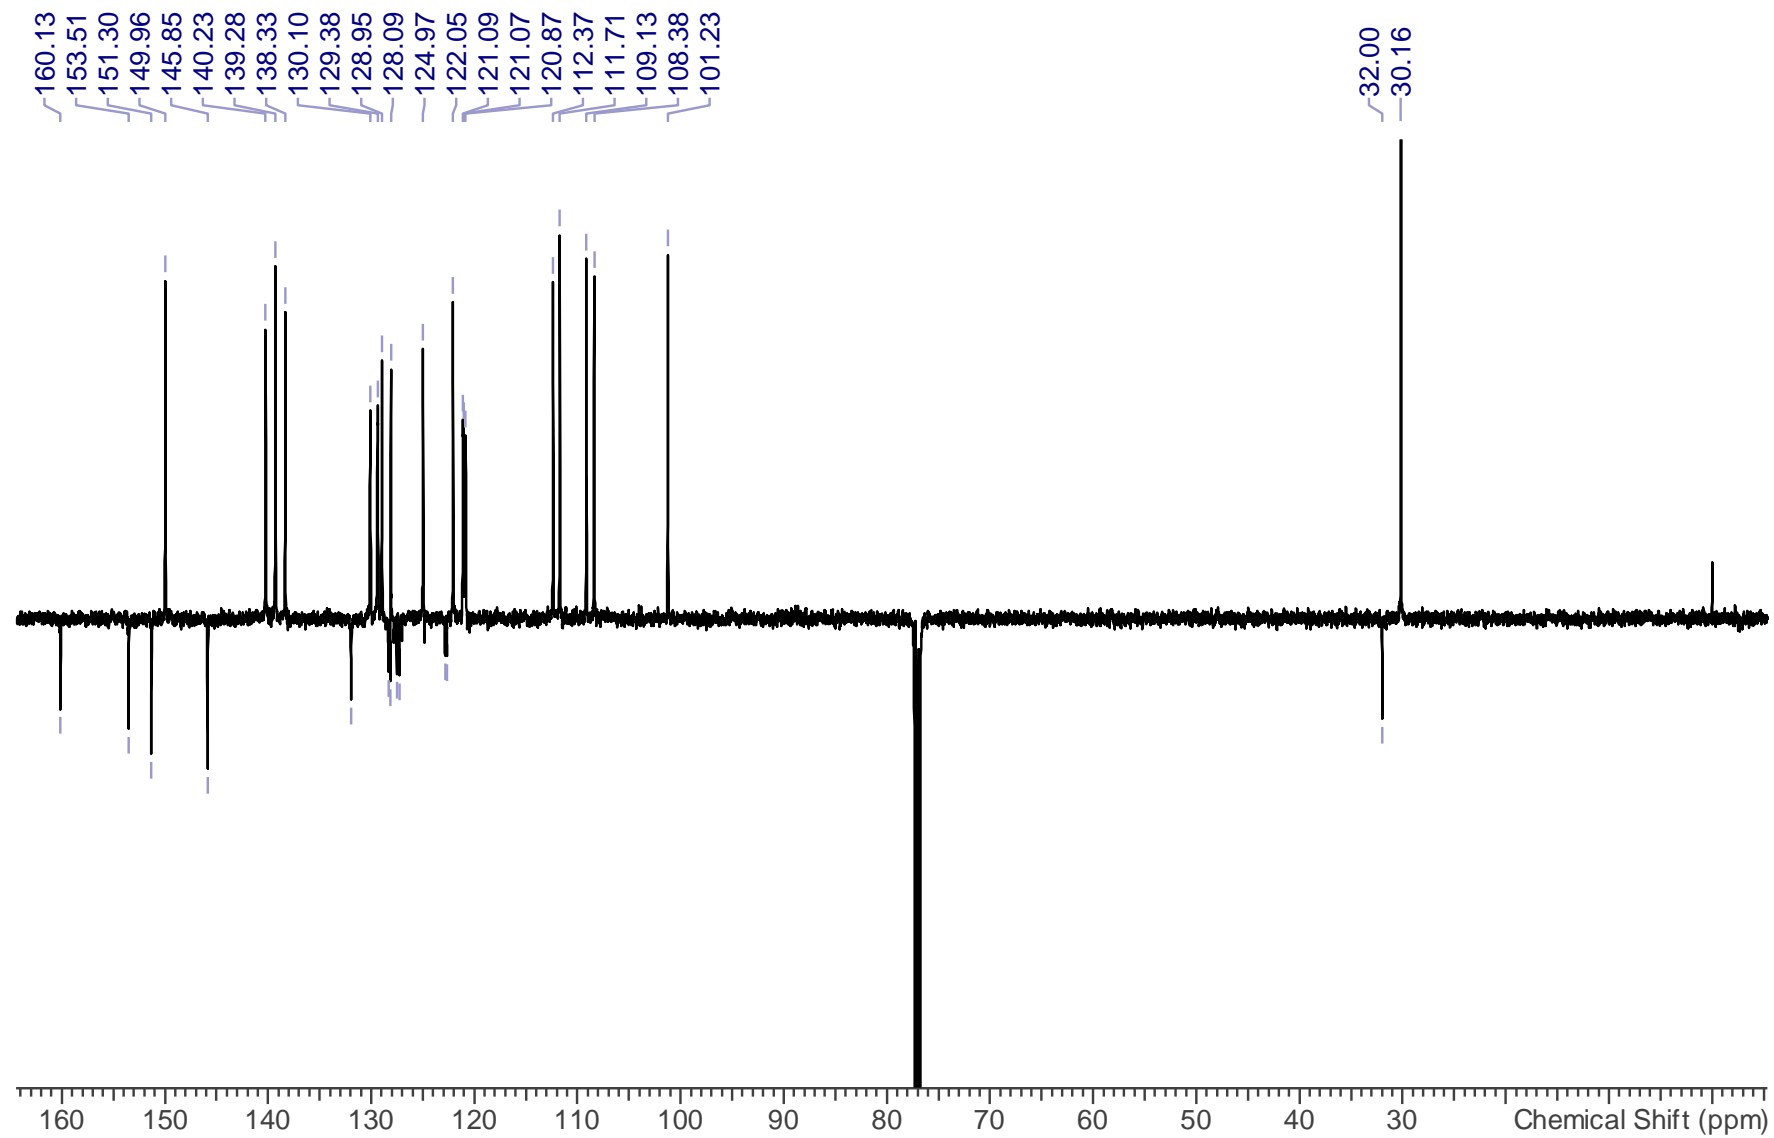

Section of  $^{13}\text{C}$  DEPT spectrum of **3bL<sub>2</sub>**

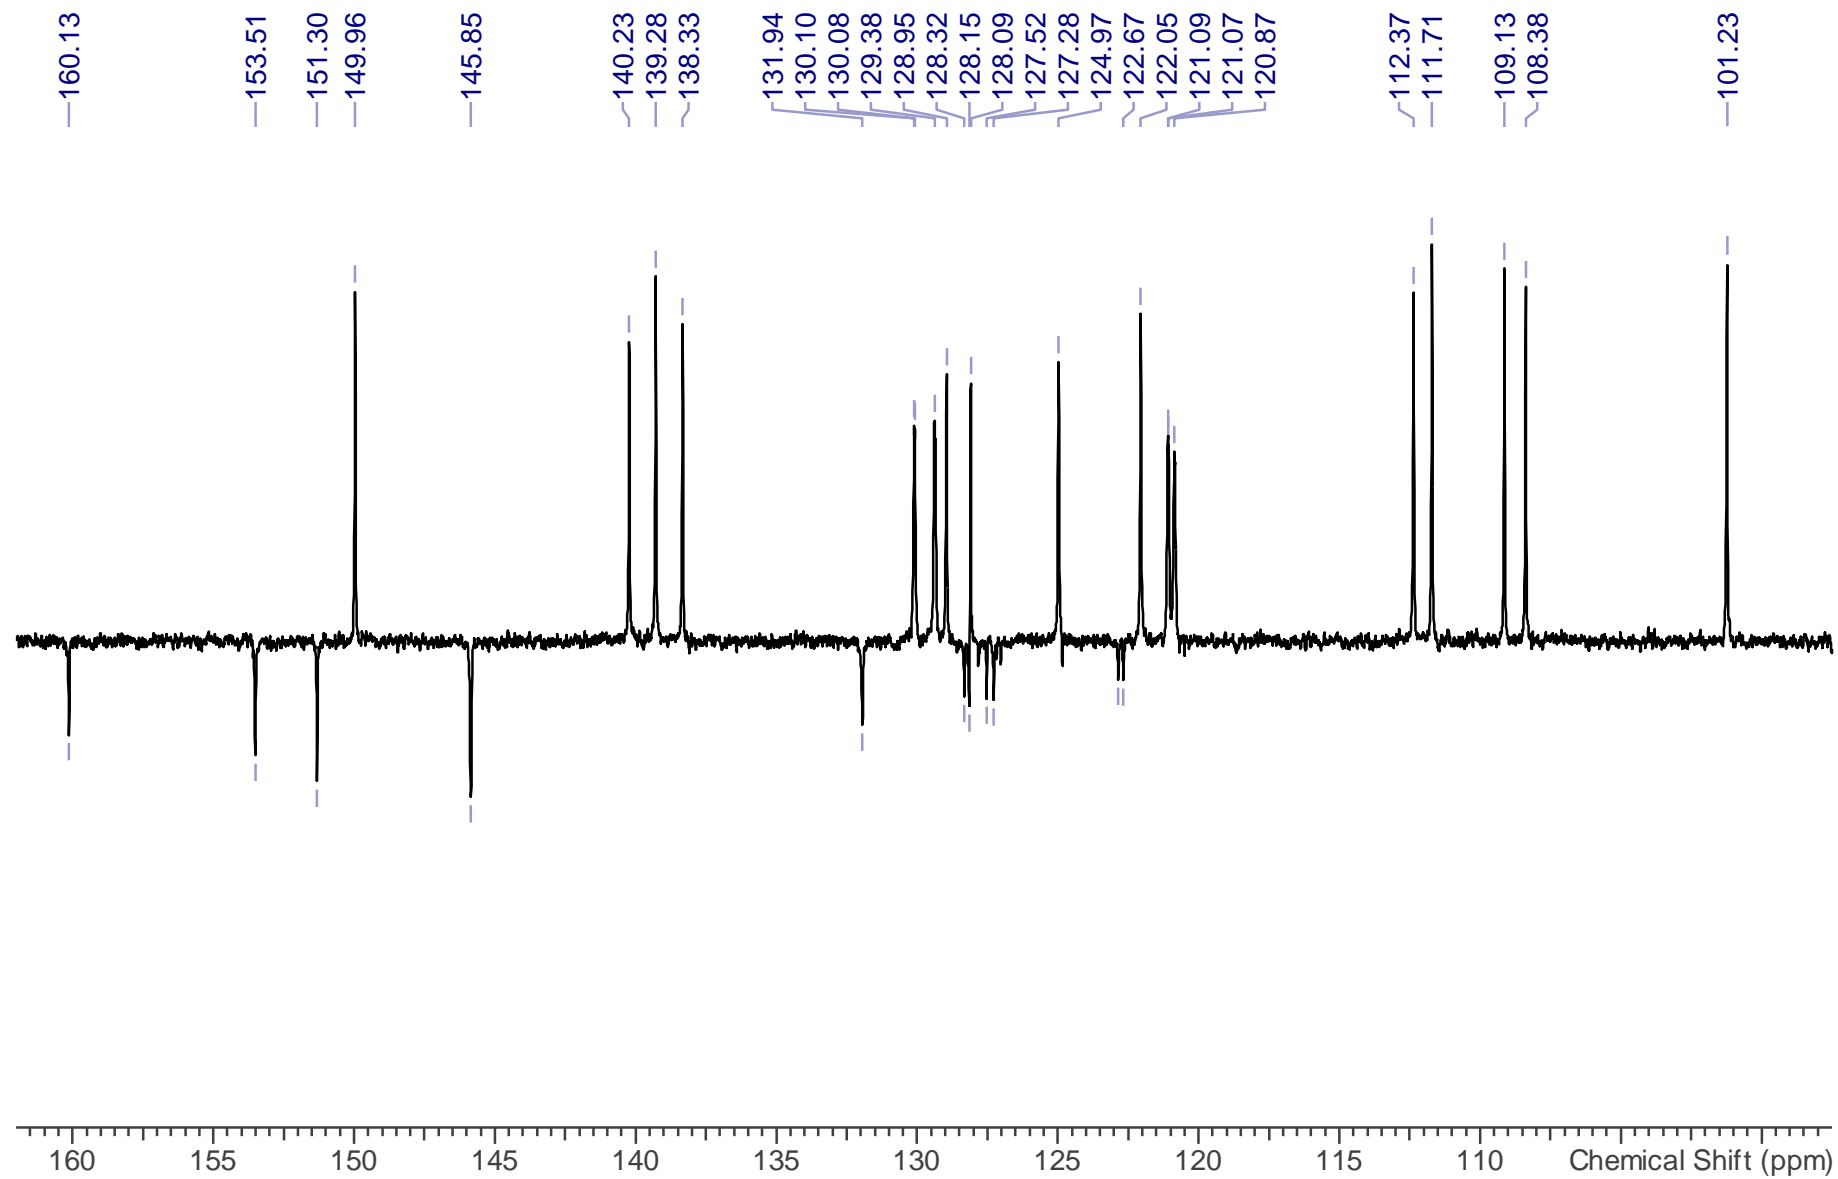

Section of the TOCSY spectrum of **3bL2**

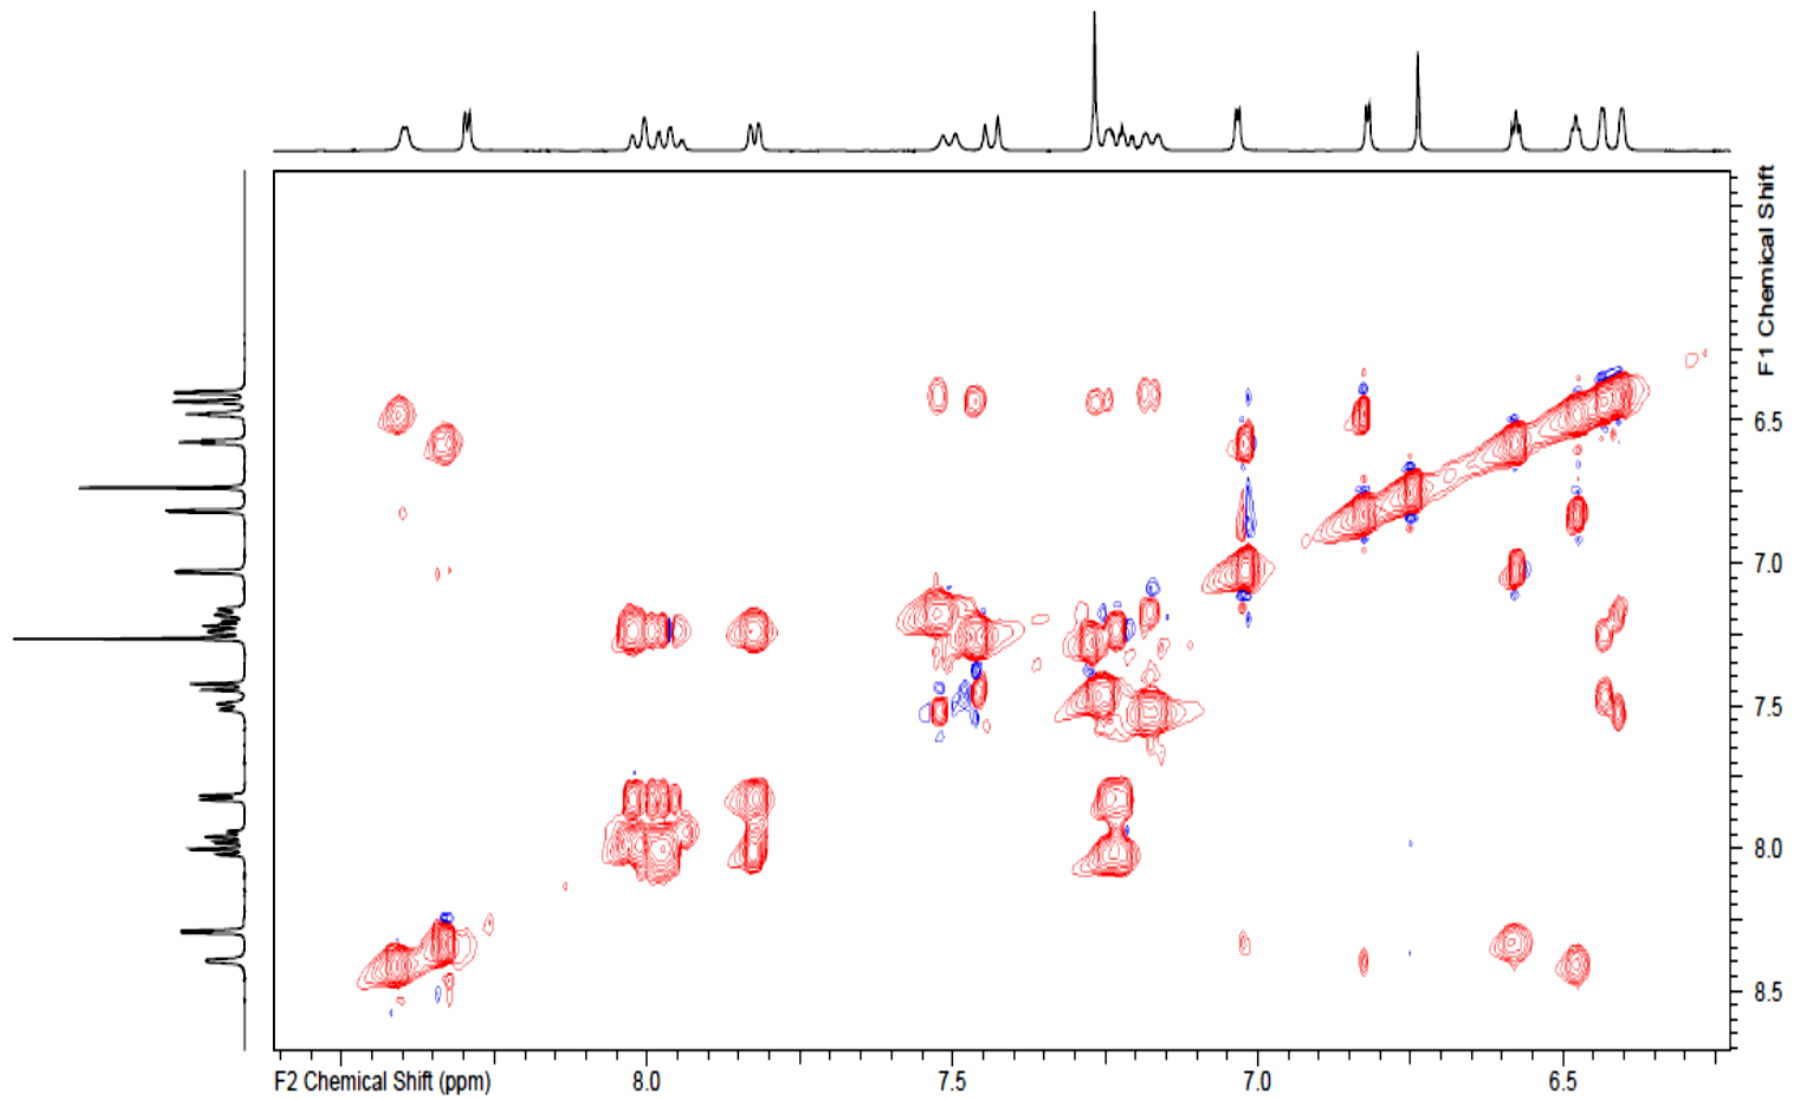

Section of the COSY spectrum of **3bL<sub>2</sub>**

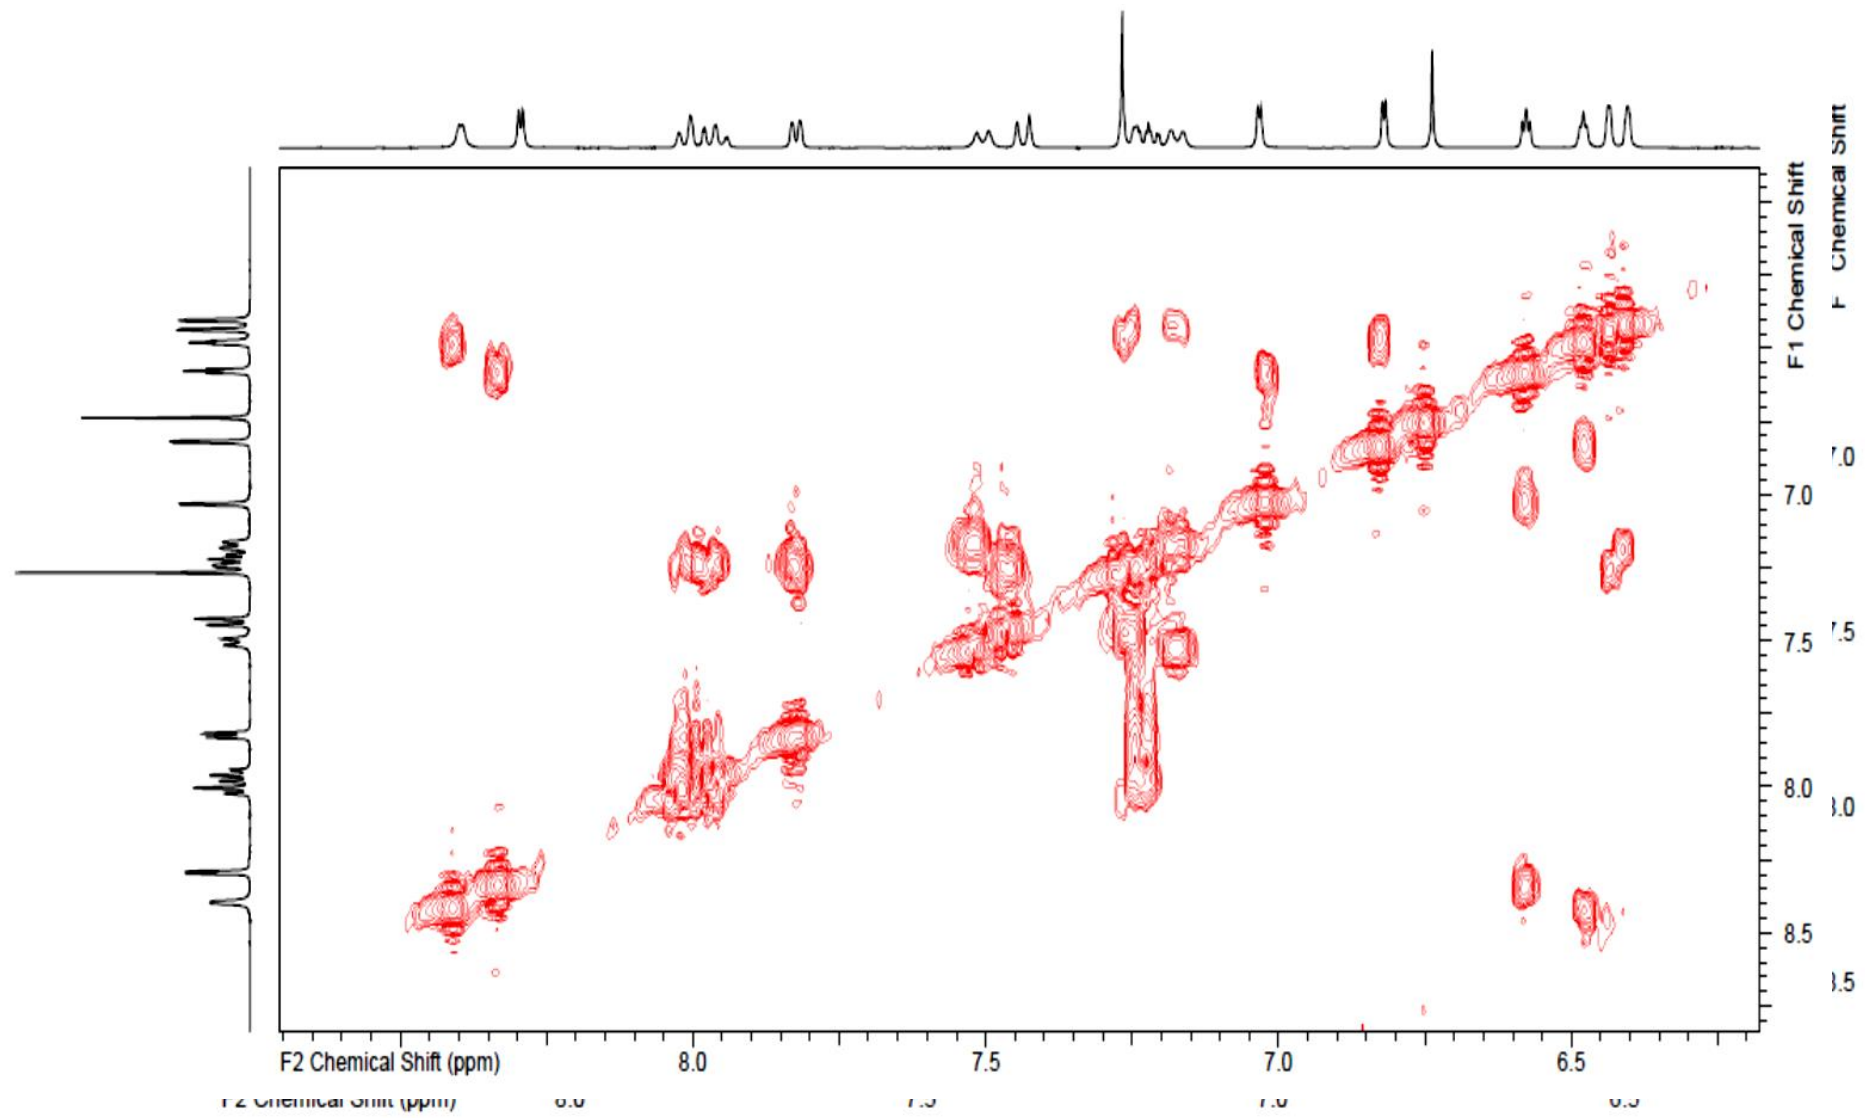

$^{19}\text{F}$  NMR spectrum of **3bL<sub>2</sub>**

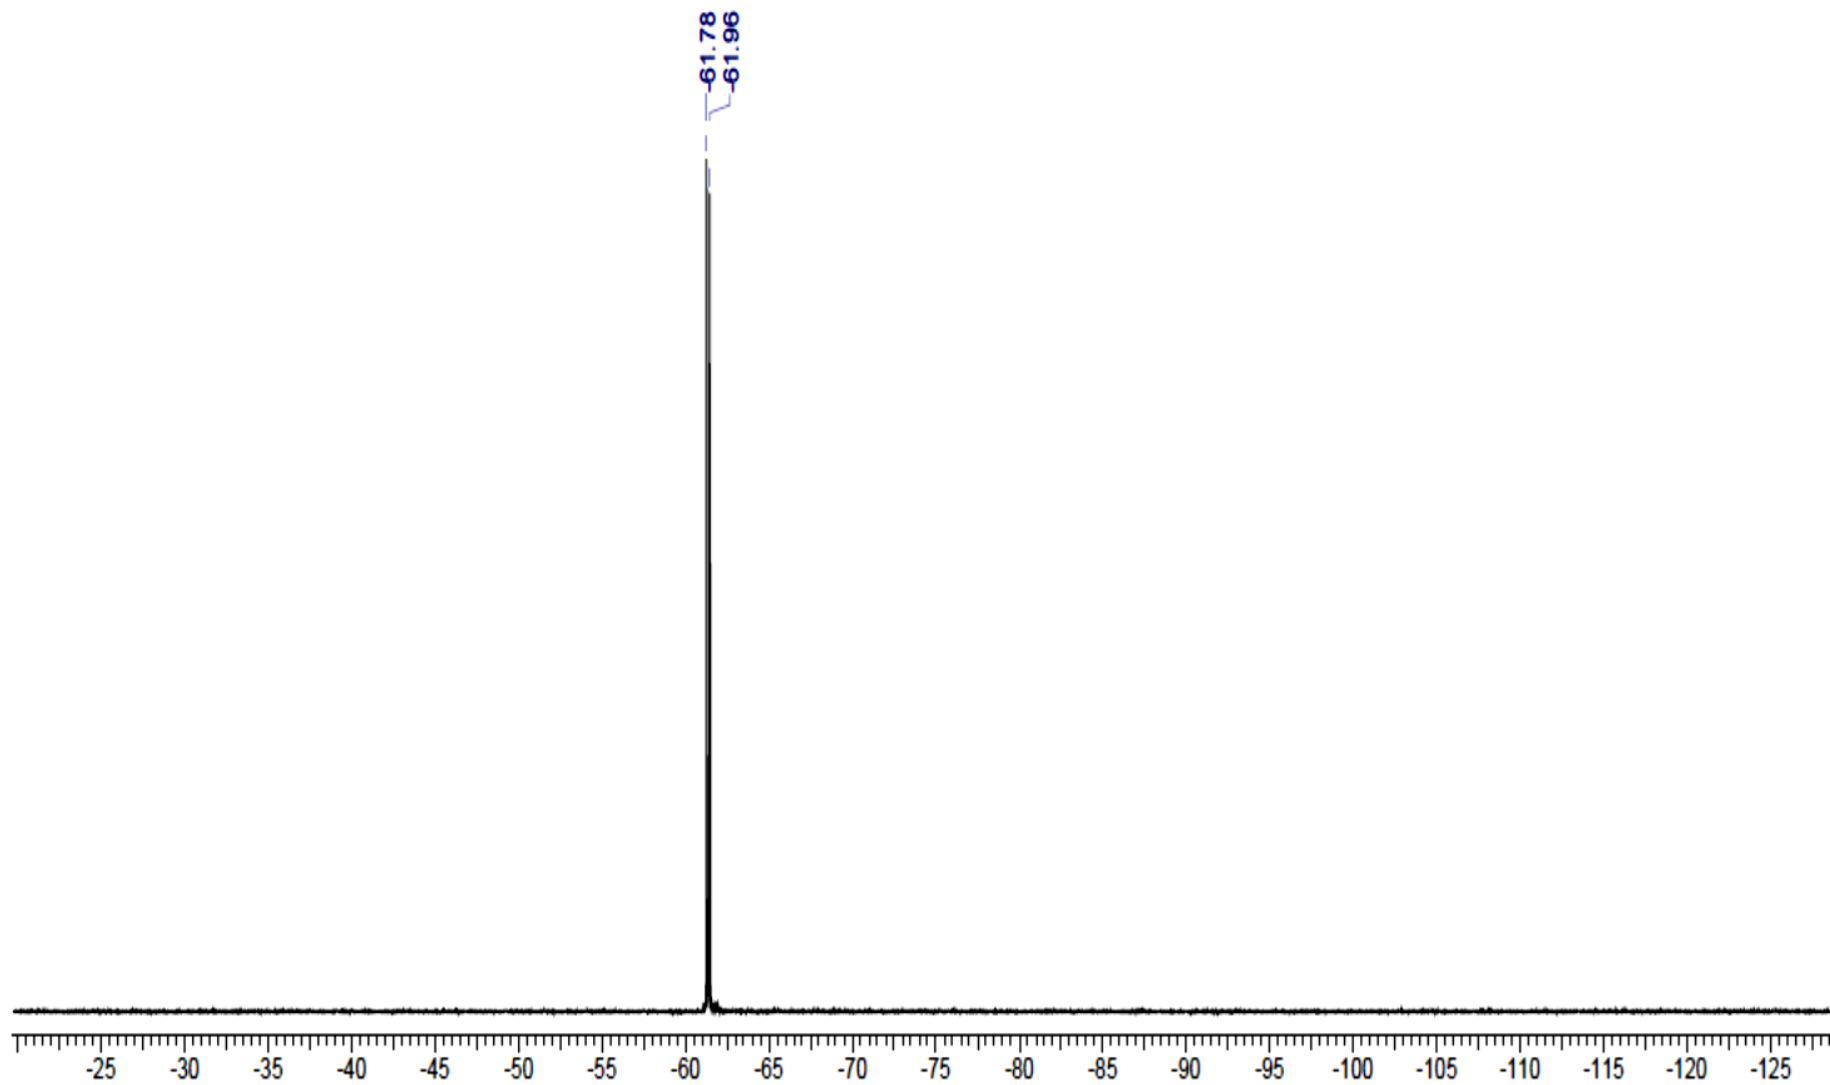



$^1\text{H}$  NMR spectrum of **3bL3**

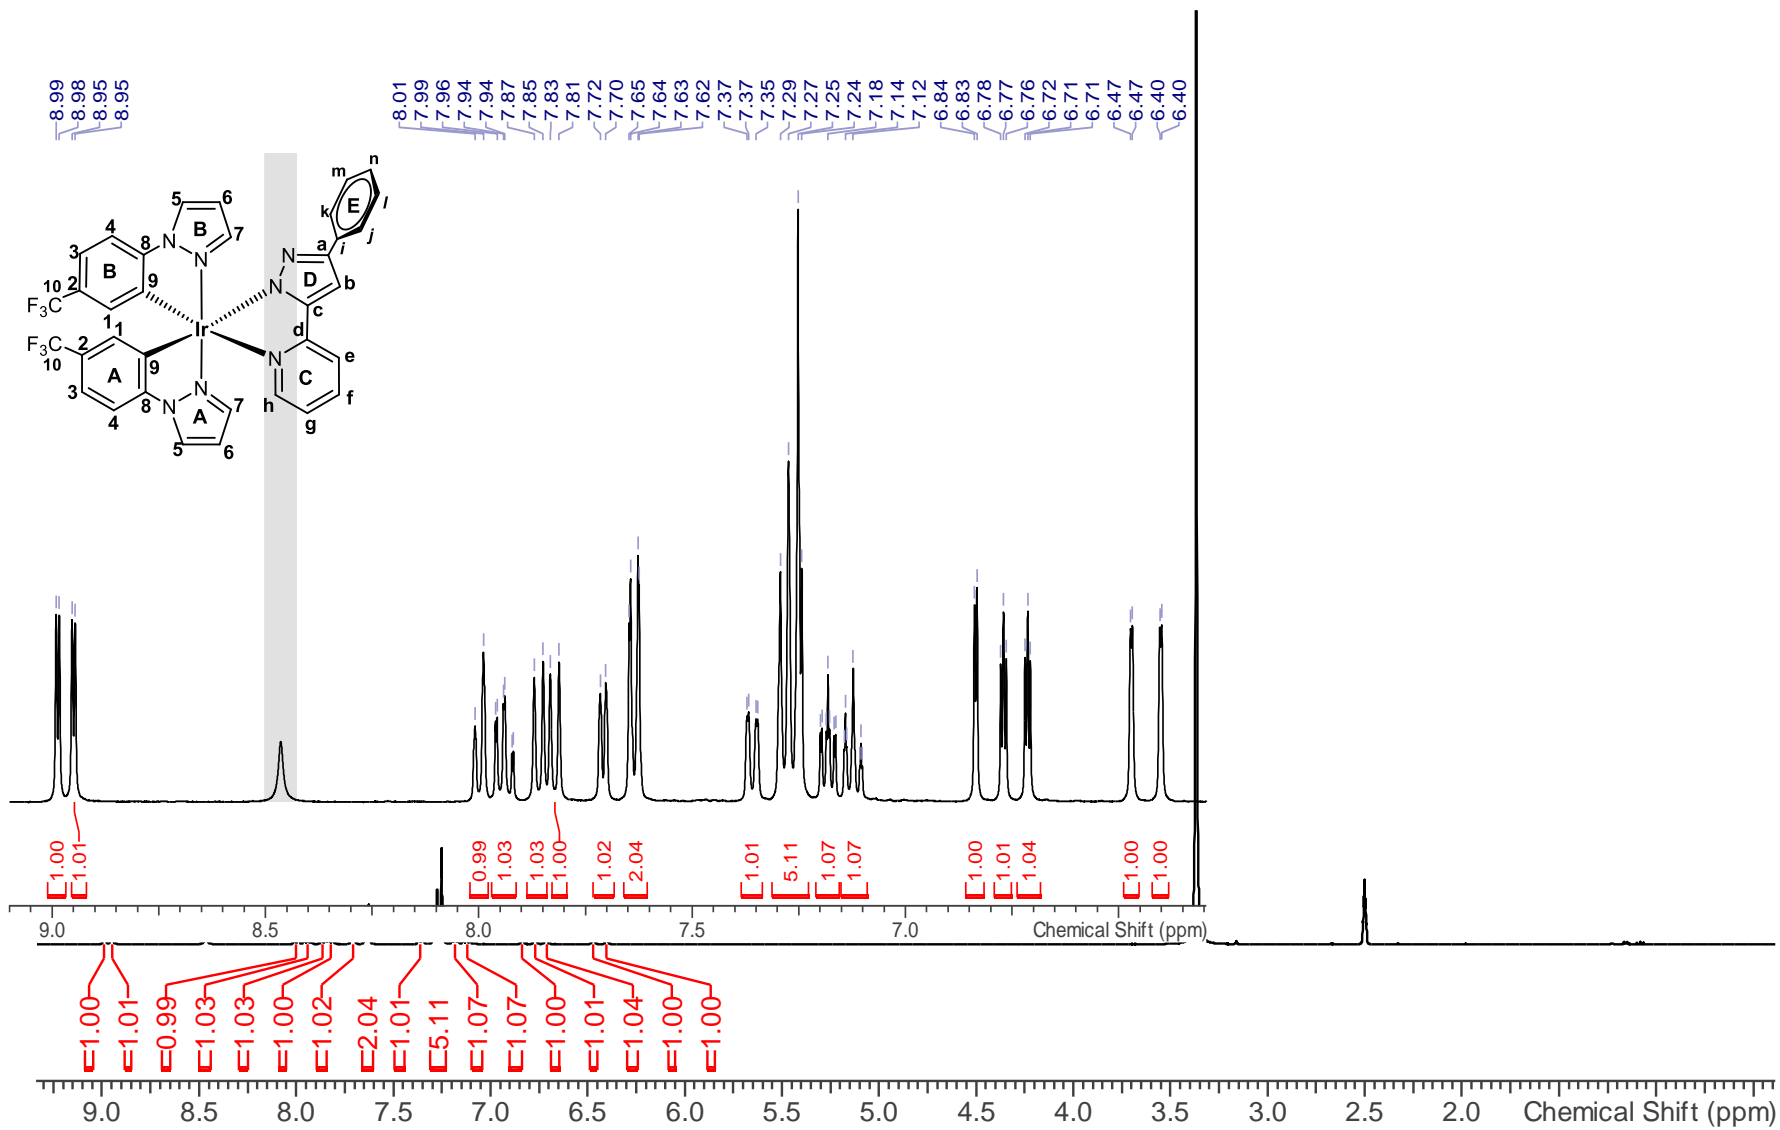

Peak at 8.45 is HC(O)NH<sub>2</sub> impurity in the solvent

<sup>13</sup>C DEPT spectrum of **3bL<sub>3</sub>**

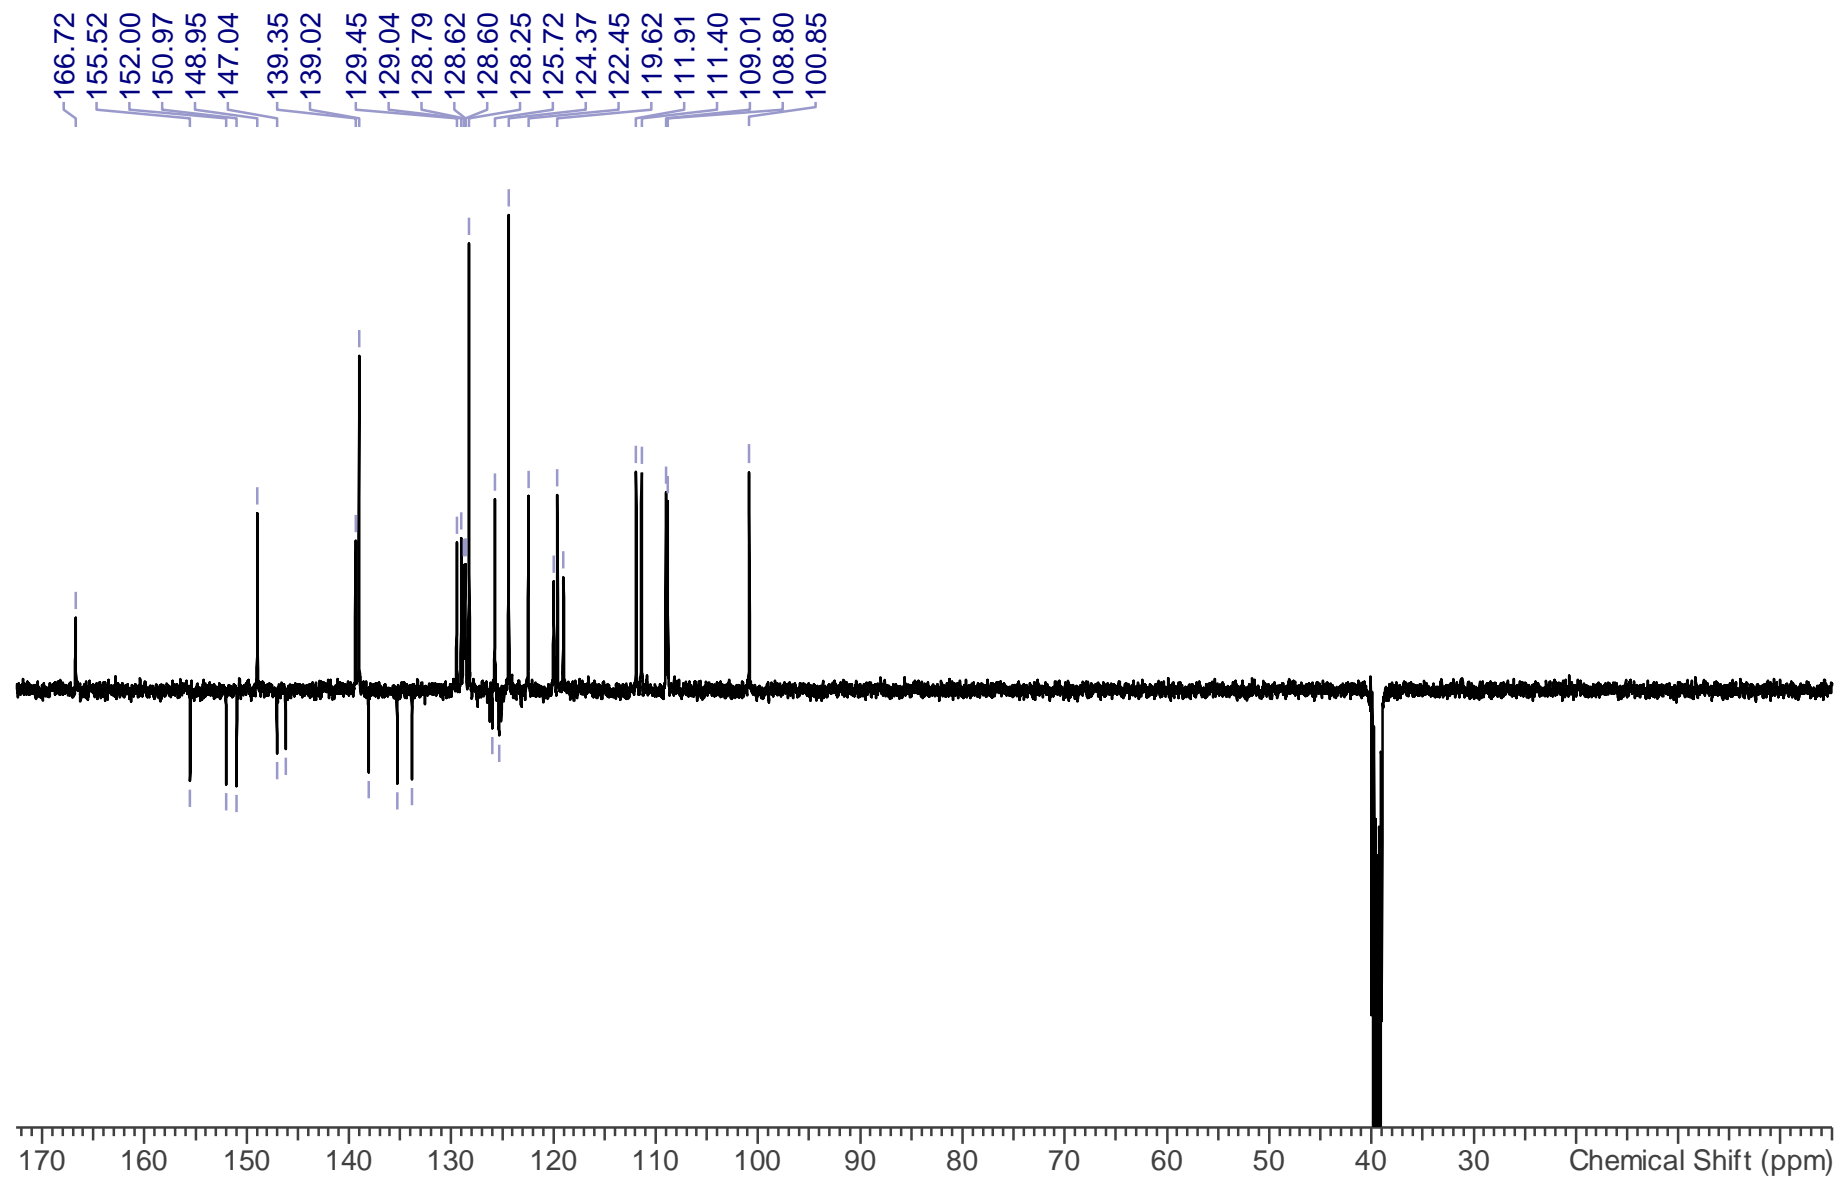

Section of  $^{13}\text{C}$  DEPT spectrum of **3bL3**

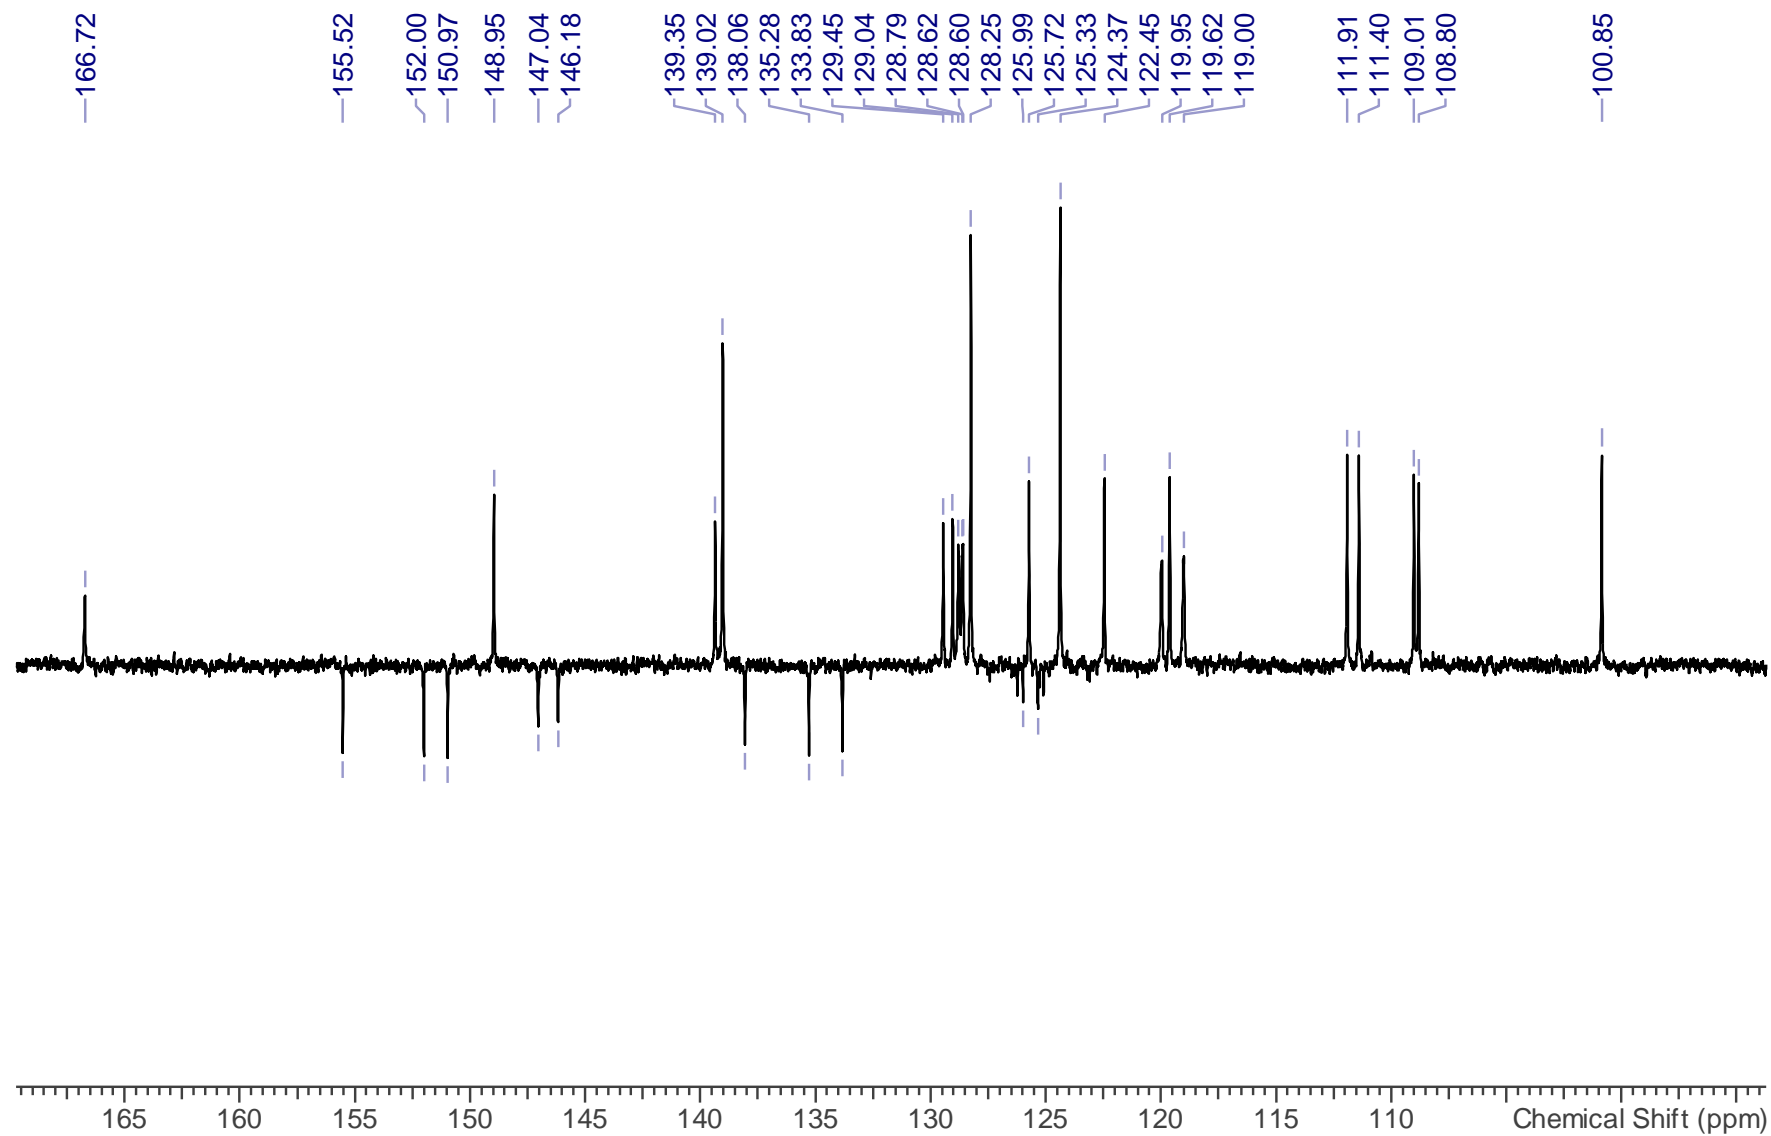

Section of the TOCSY spectrum of **3bL<sub>3</sub>**

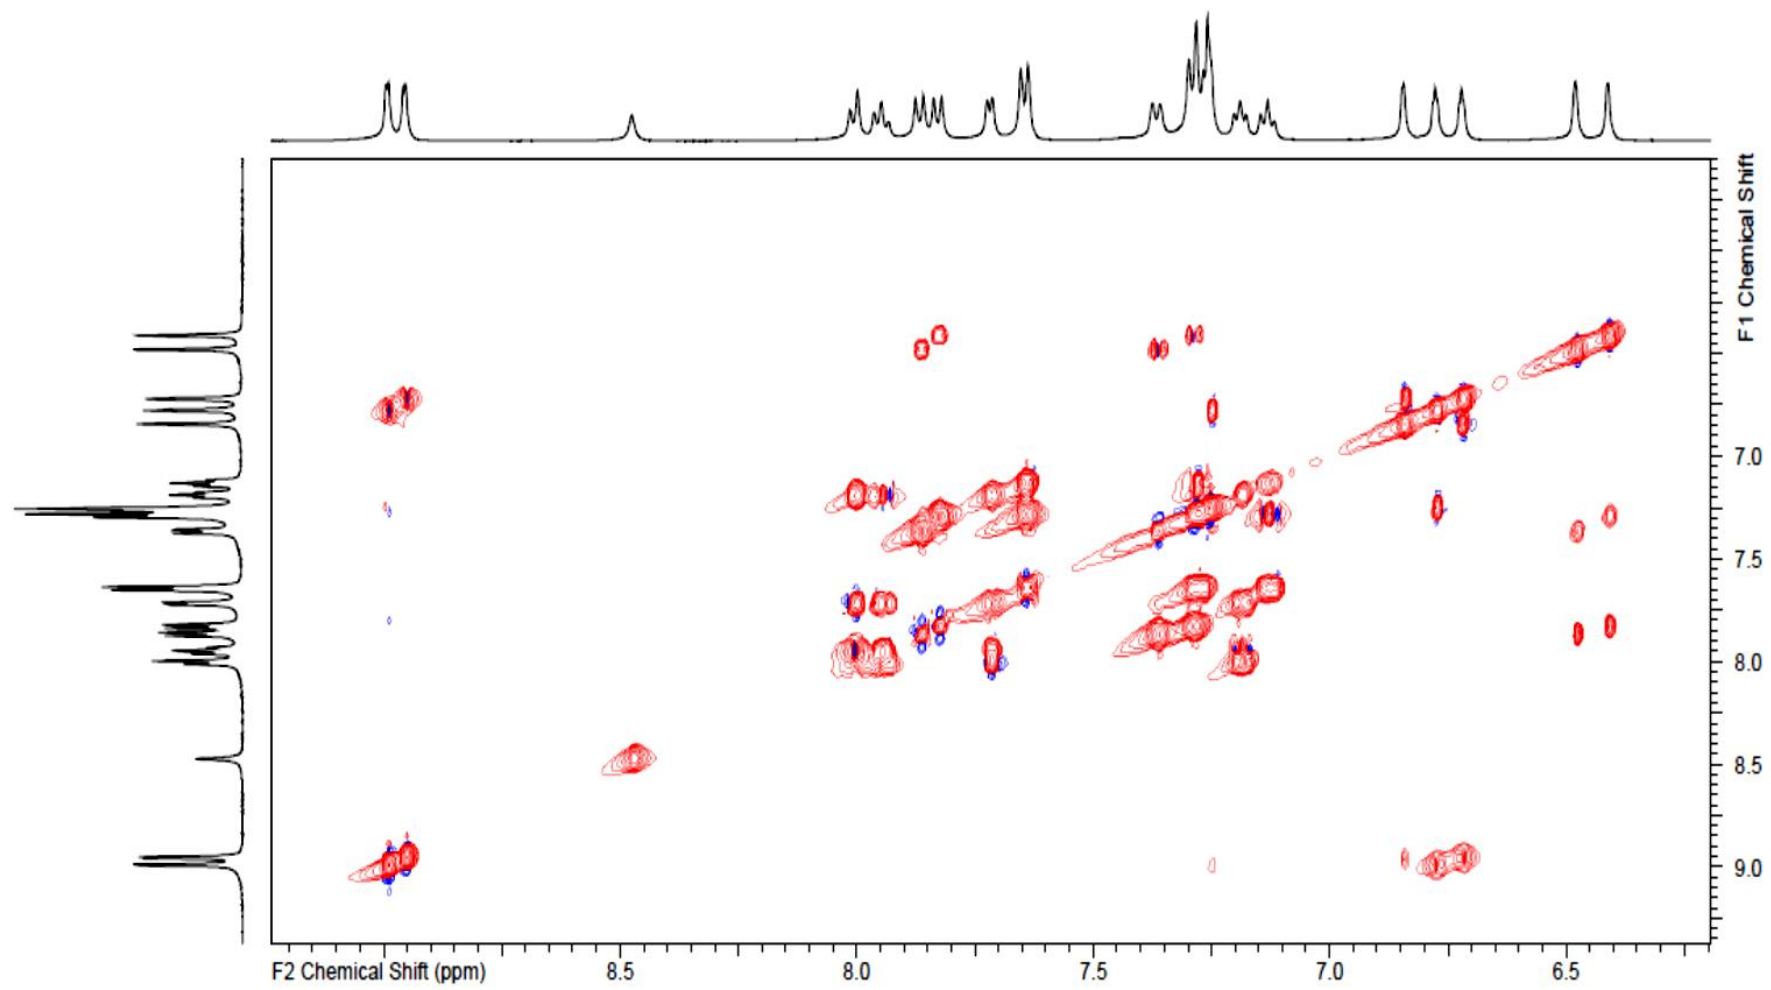

Section of the COSY spectrum of **3bL3**

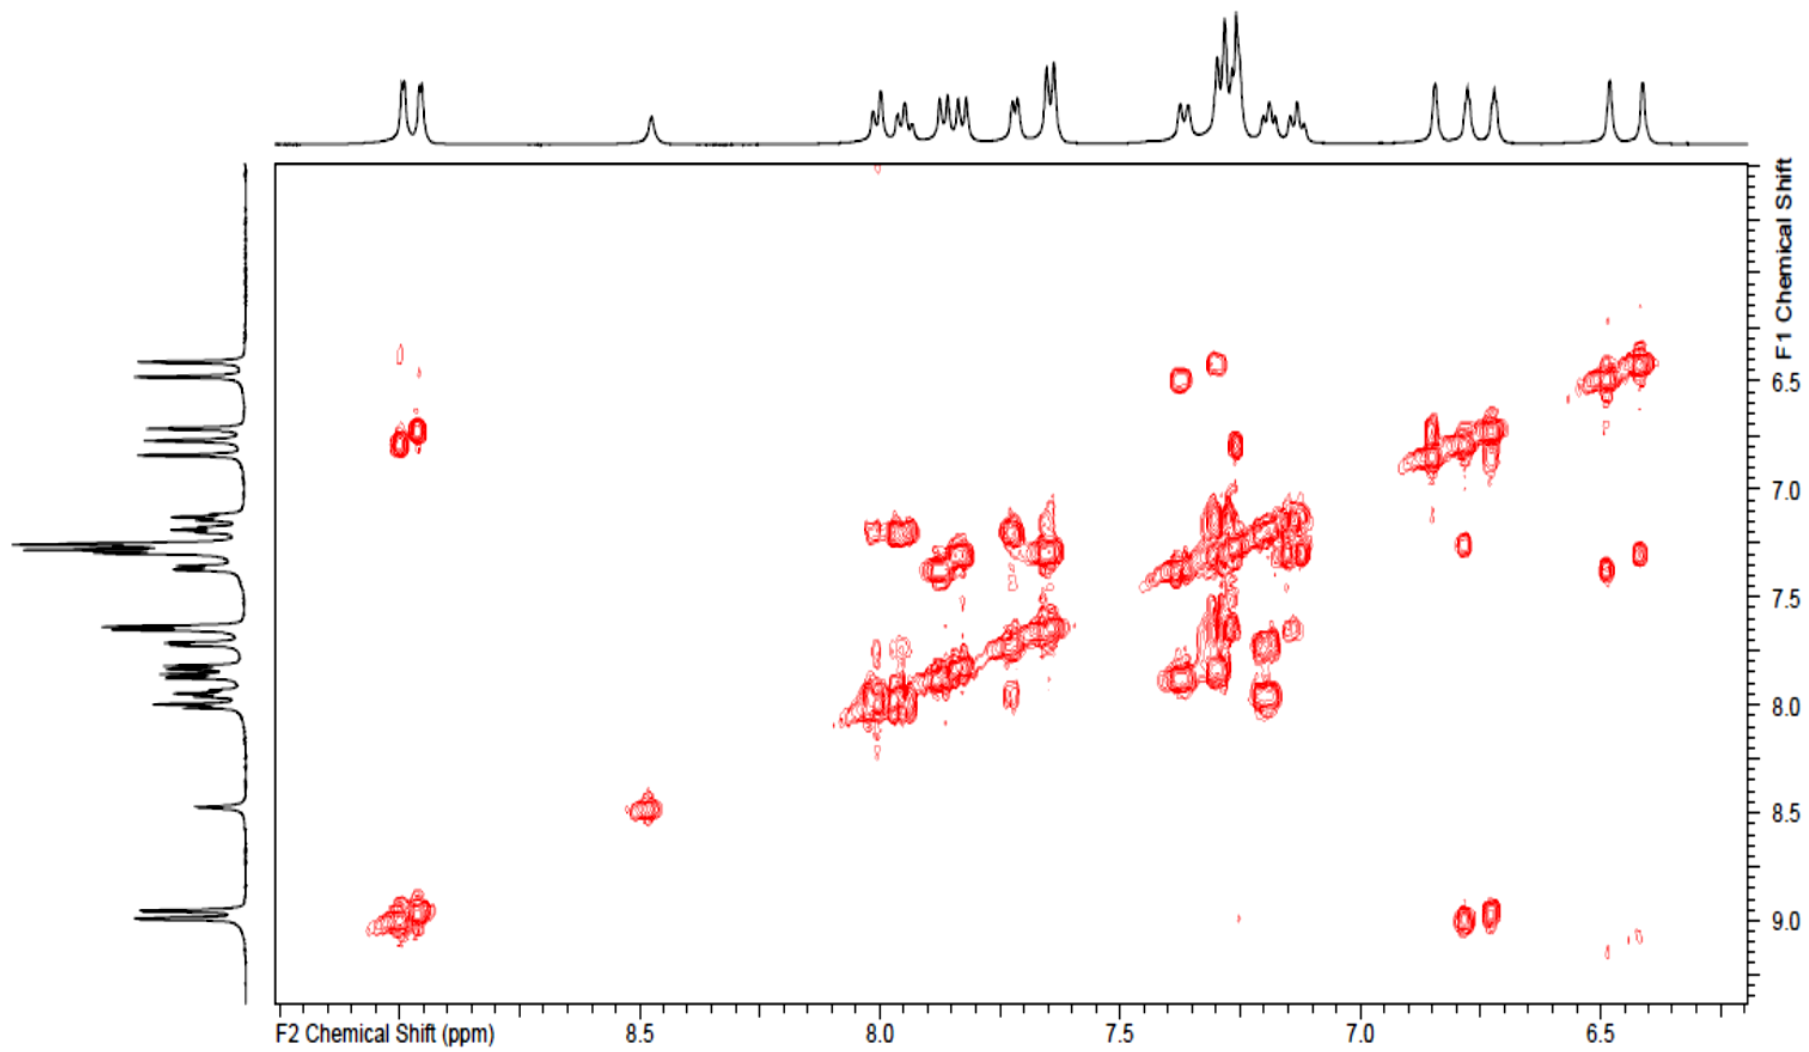

Section of the NOESY spectrum of **3bL<sub>3</sub>**

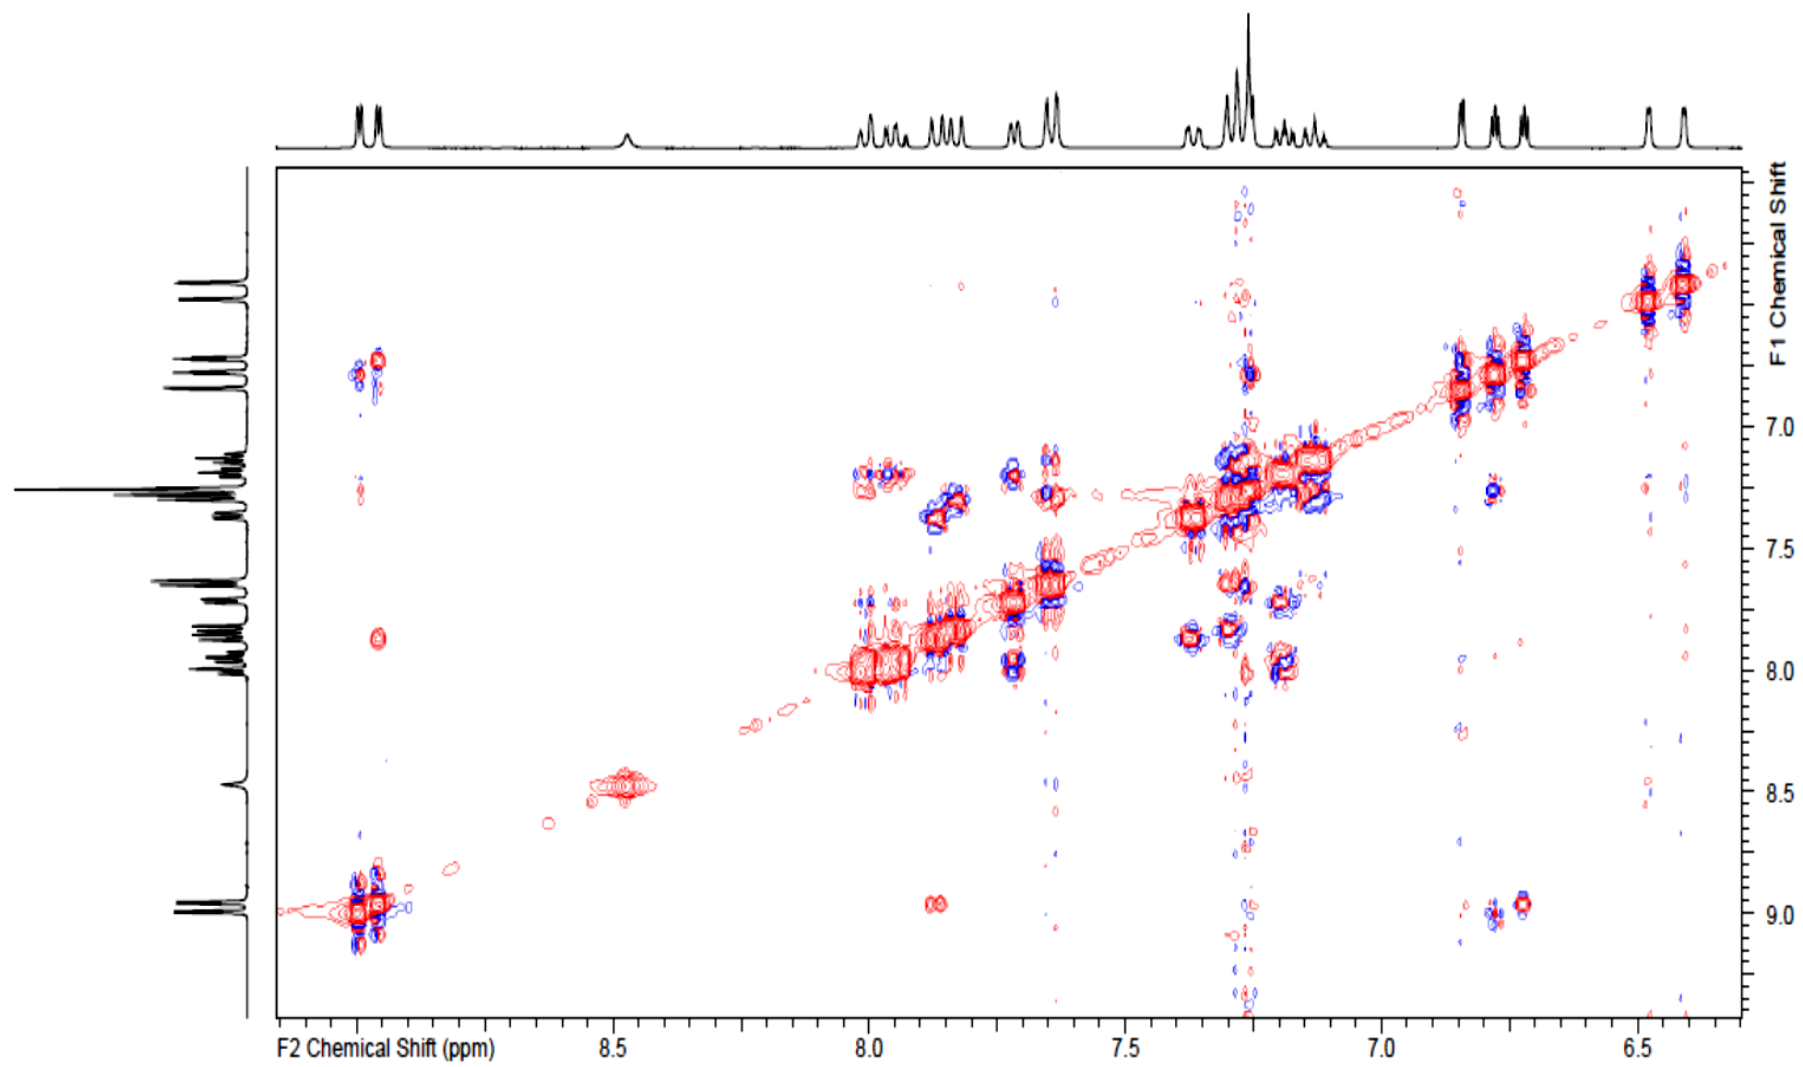

**$^{19}\text{F}$  NMR spectrum of 3bL<sub>3</sub>**

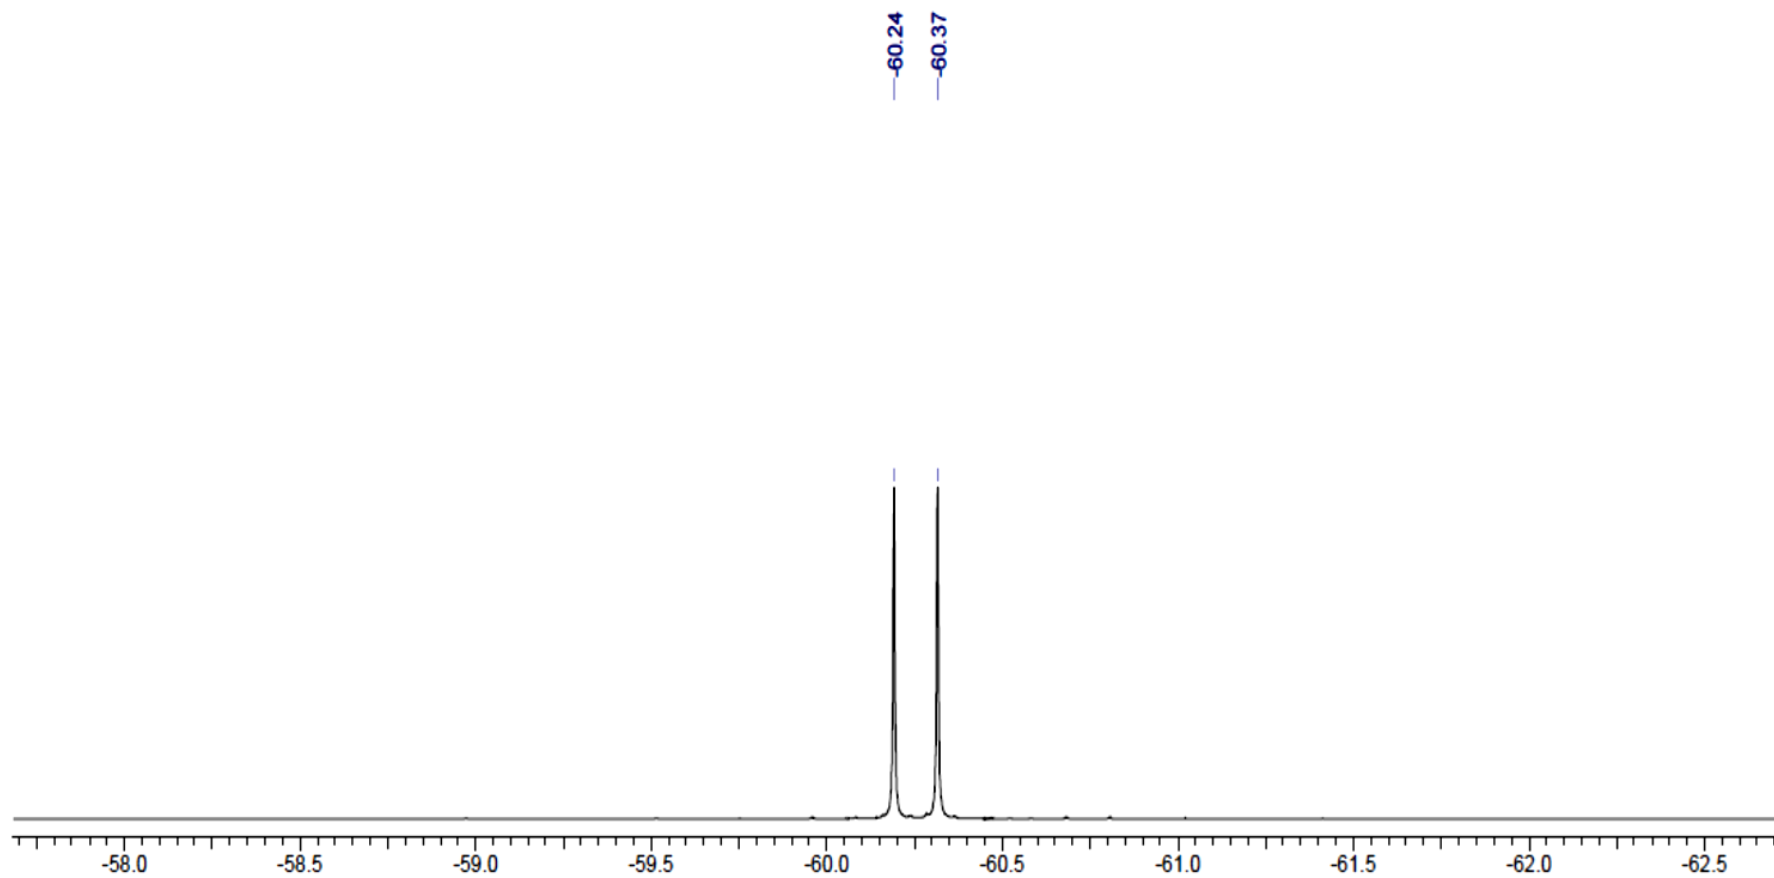

$^1\text{H}$  NMR spectrum of **2cHL<sub>1</sub>**

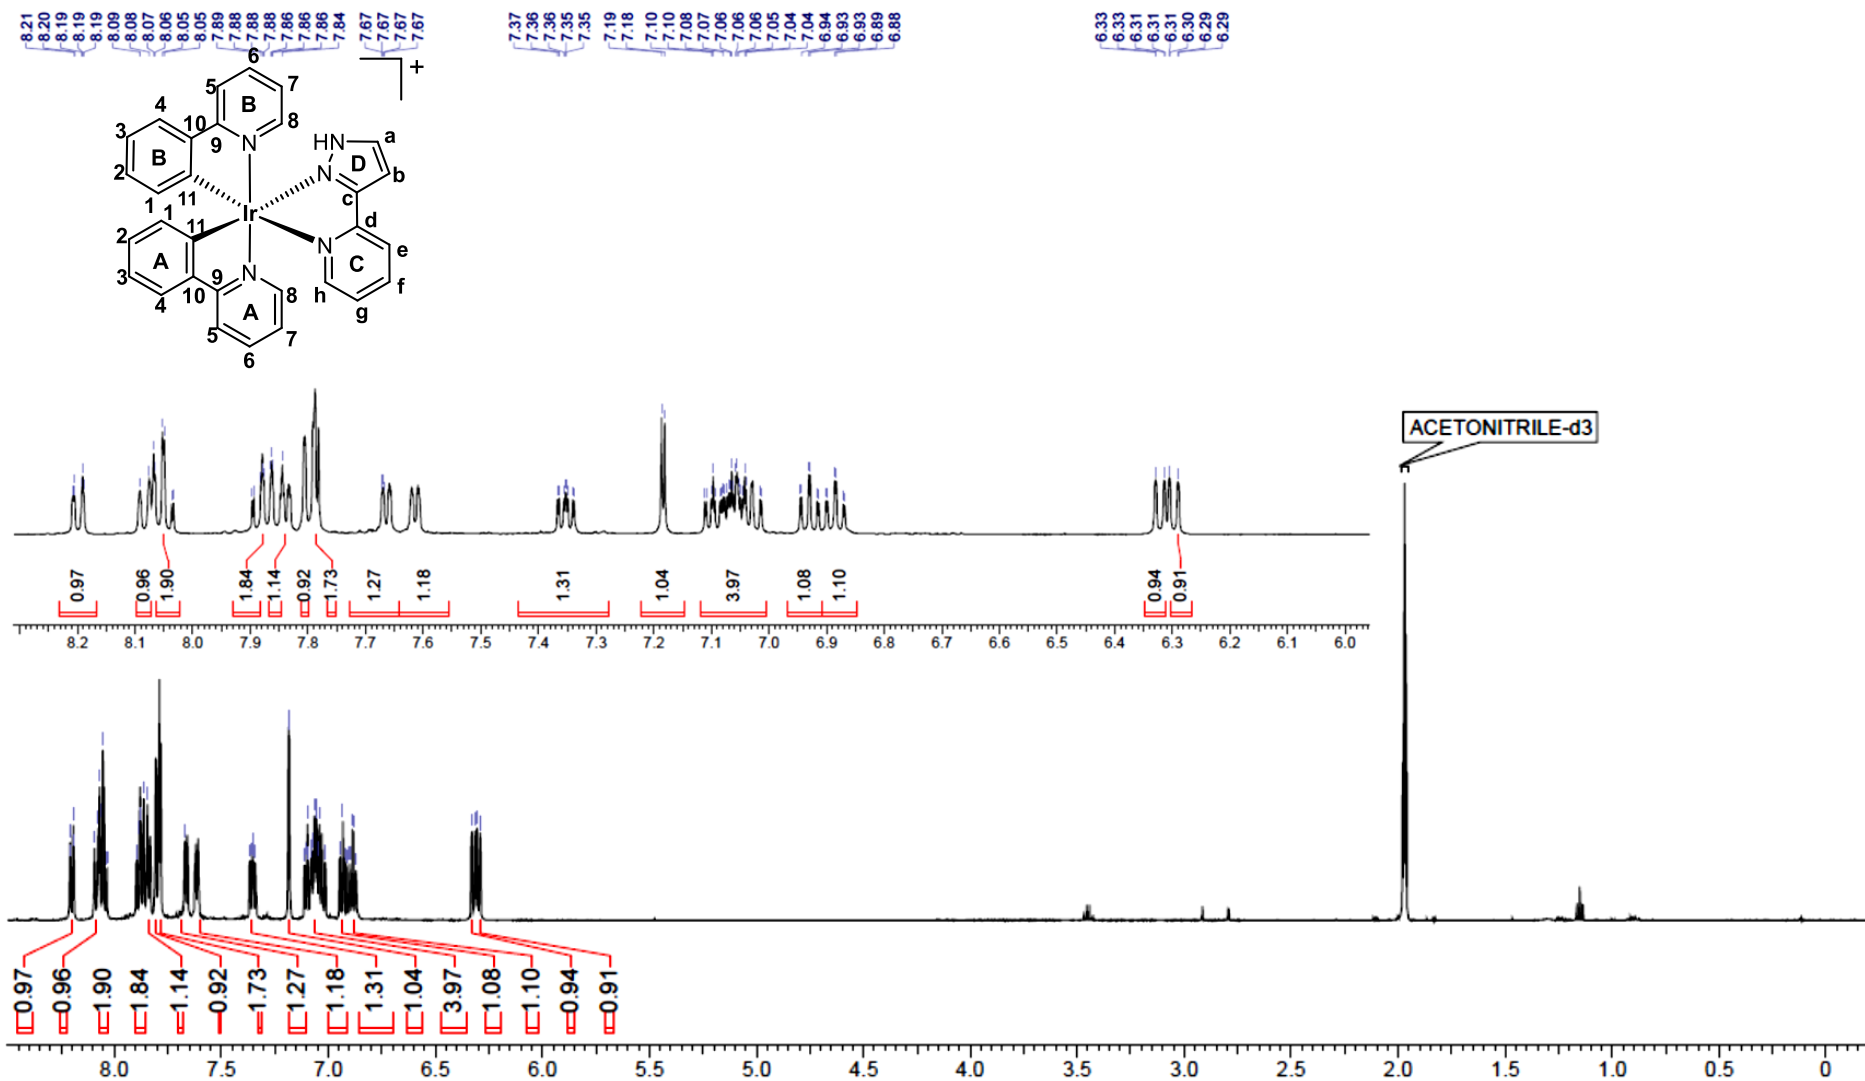



$^{13}\text{C}$  NMR APT spectrum of **2cHL<sub>1</sub>**

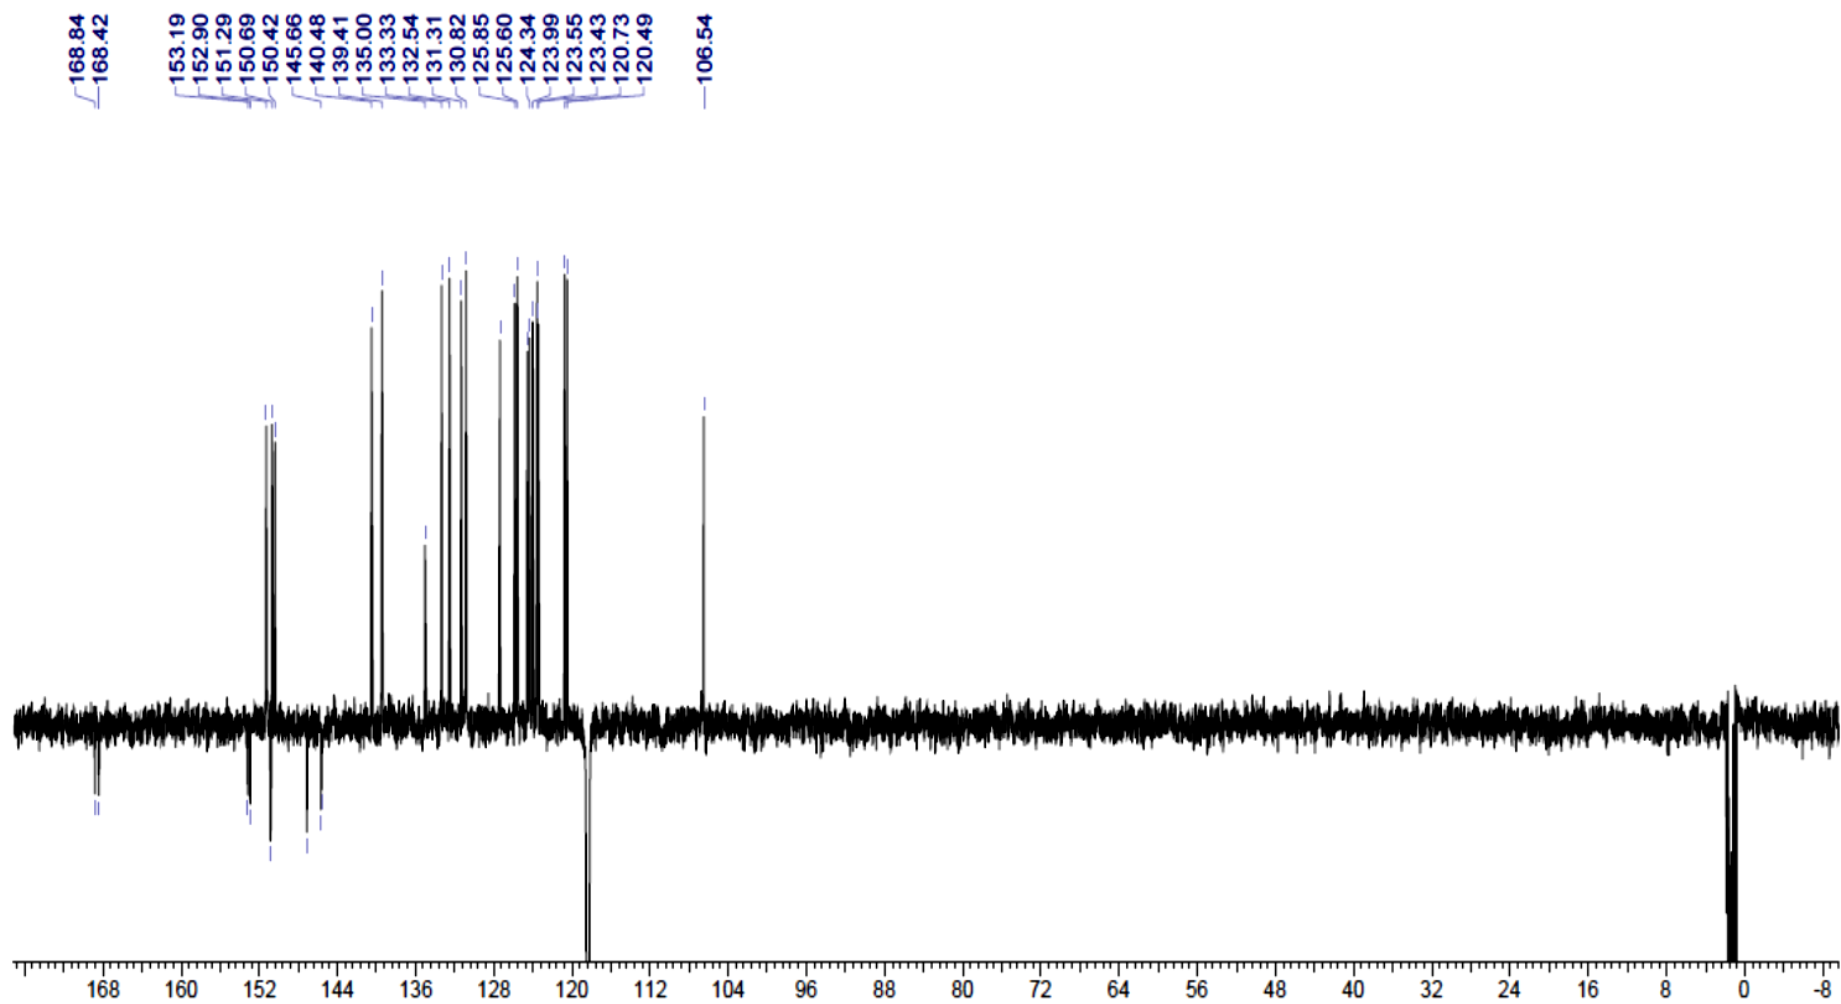

Section of  $^{13}\text{C}$  NMR APT spectrum of **2cHL<sub>1</sub>**

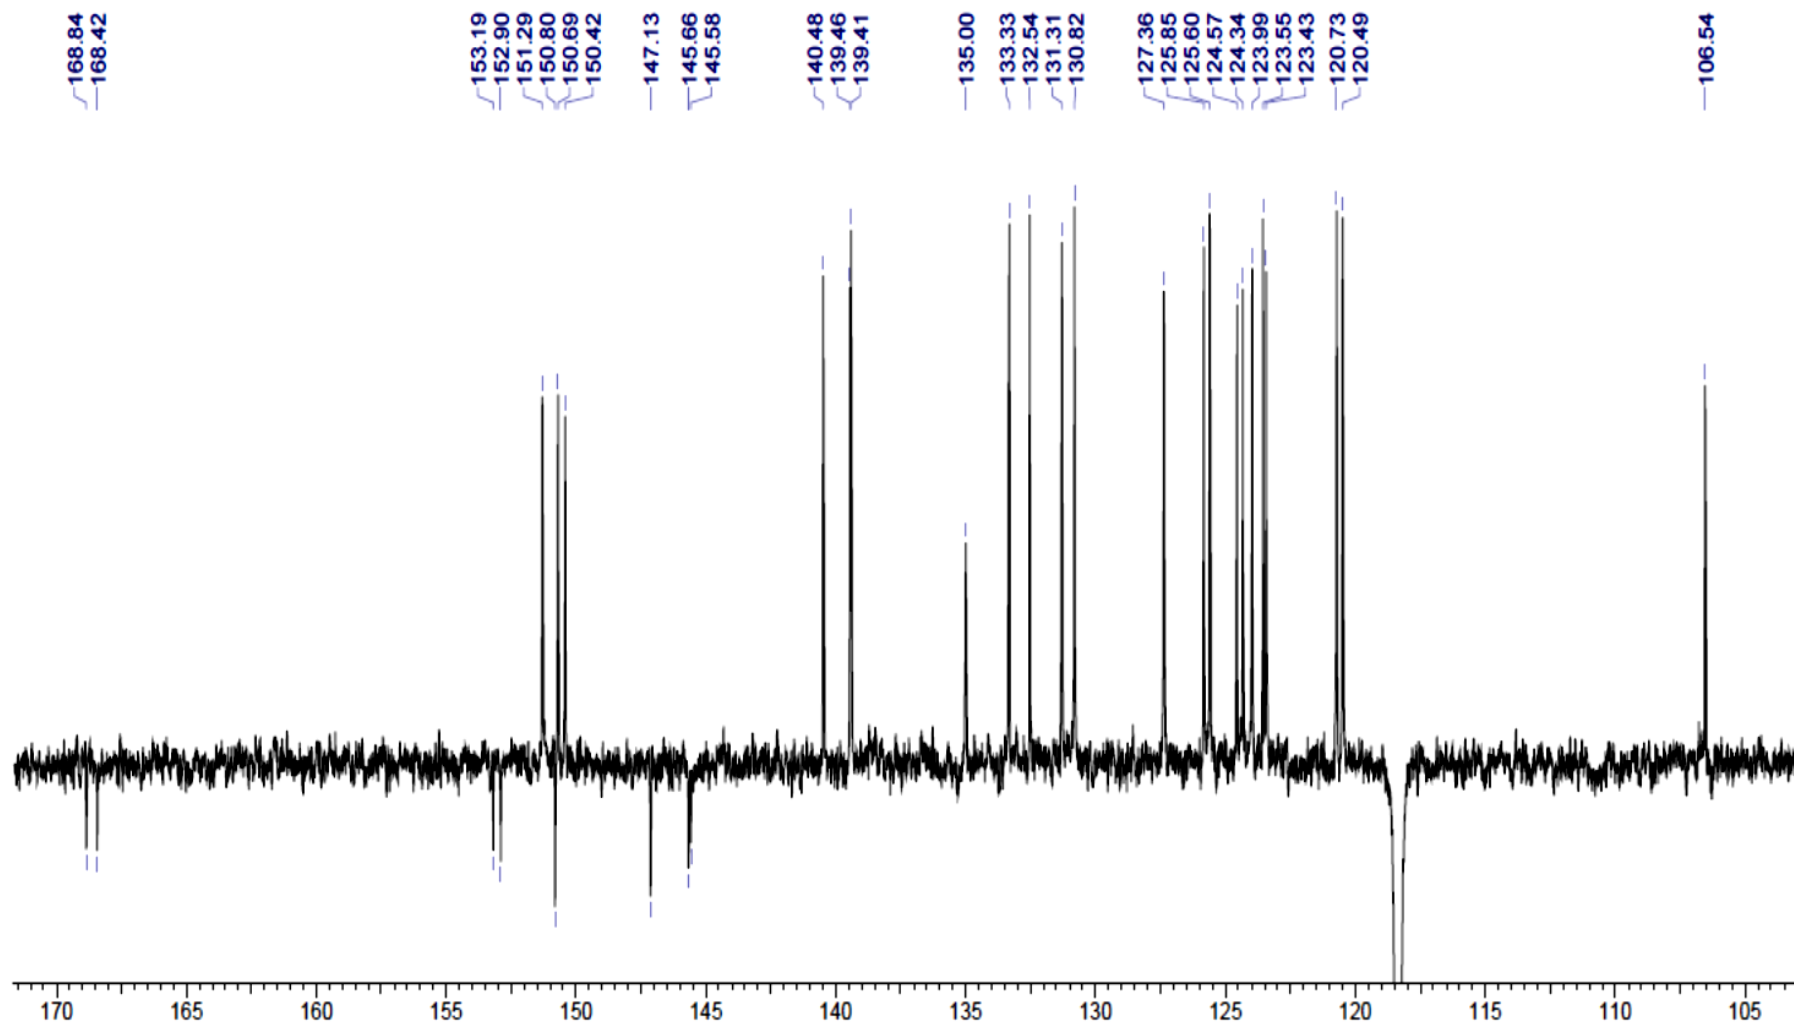

Section of the TOCSY spectrum of **2cHL<sub>1</sub>**

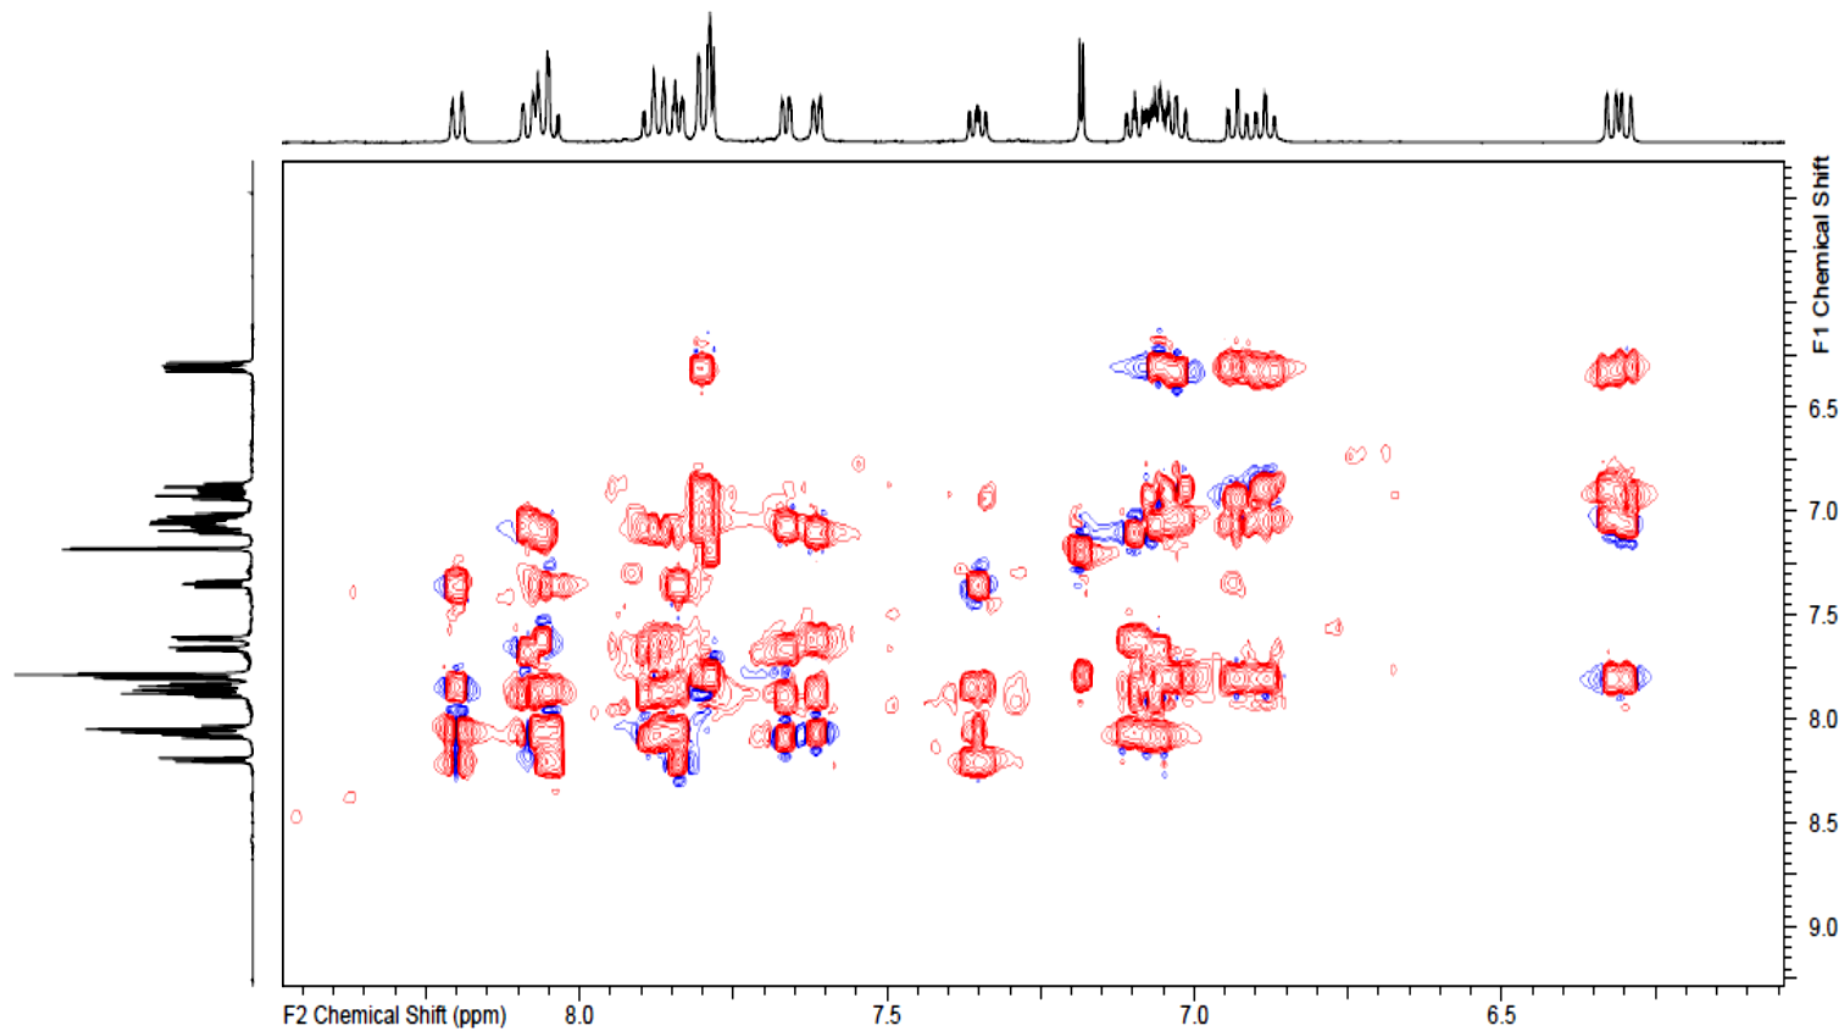

Section of the COSY spectrum of **2cHL<sub>1</sub>**

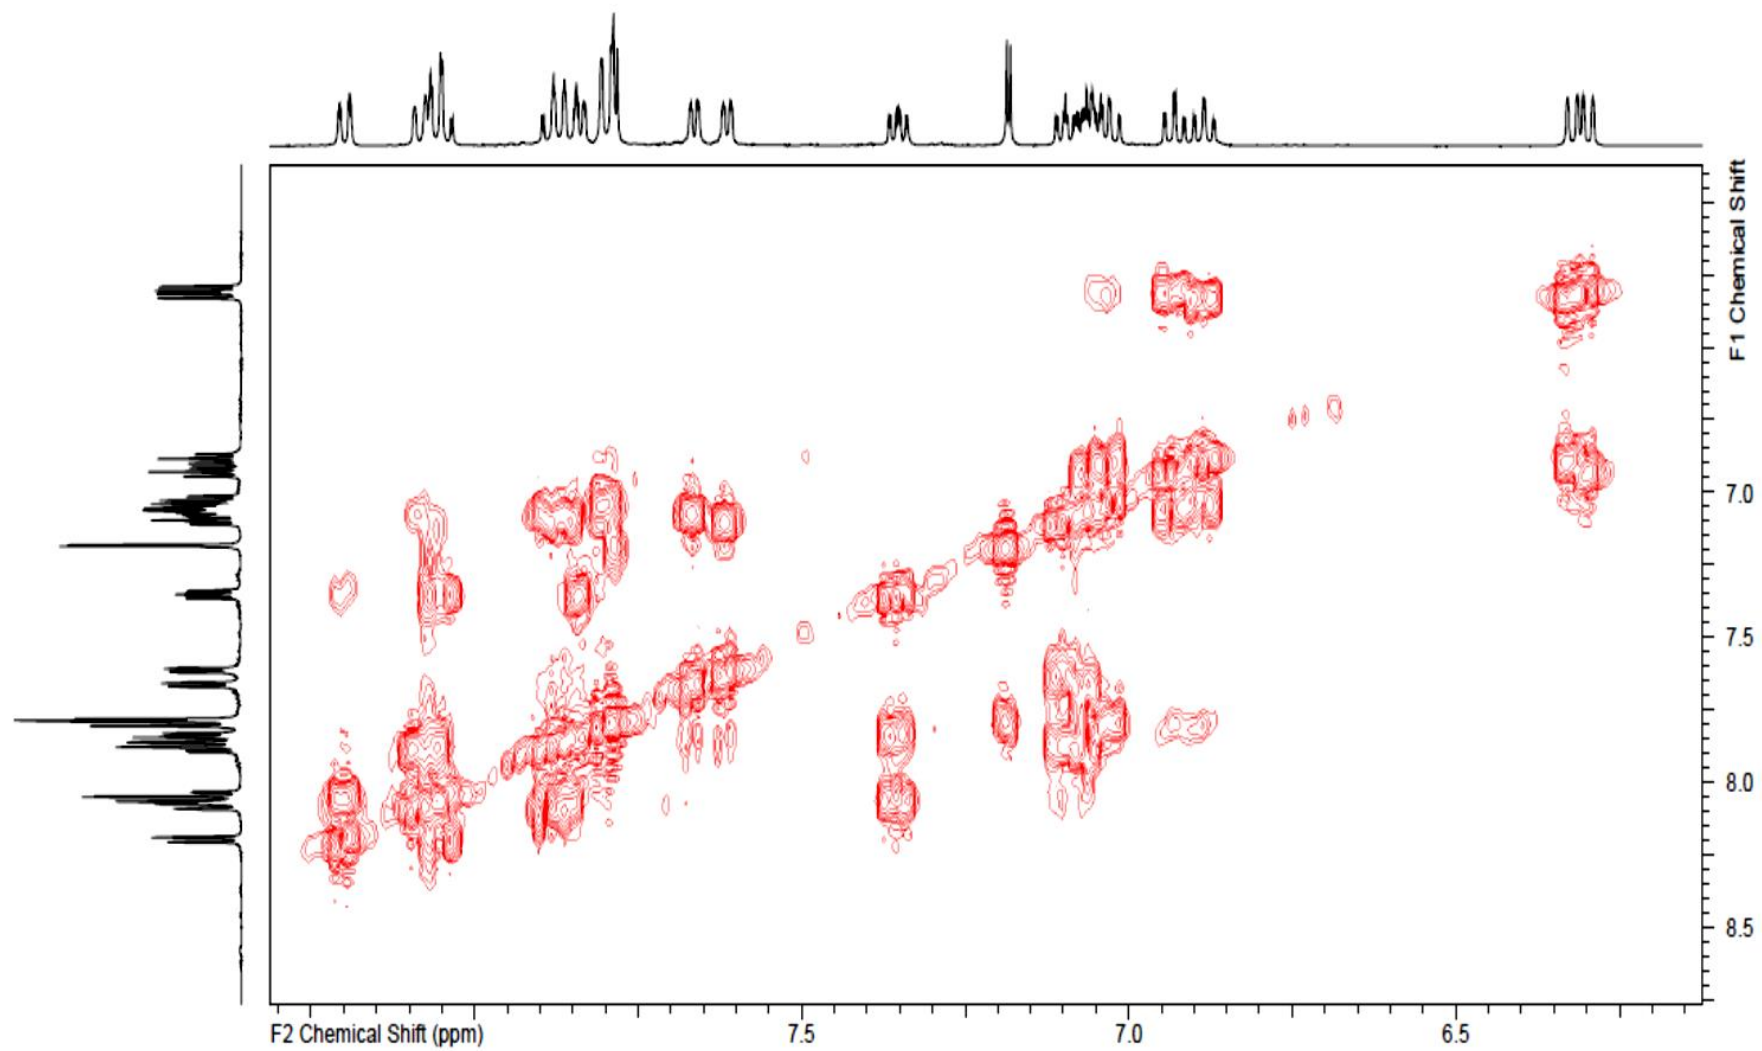

Section of the NOESY spectrum of **2cHL<sub>1</sub>**

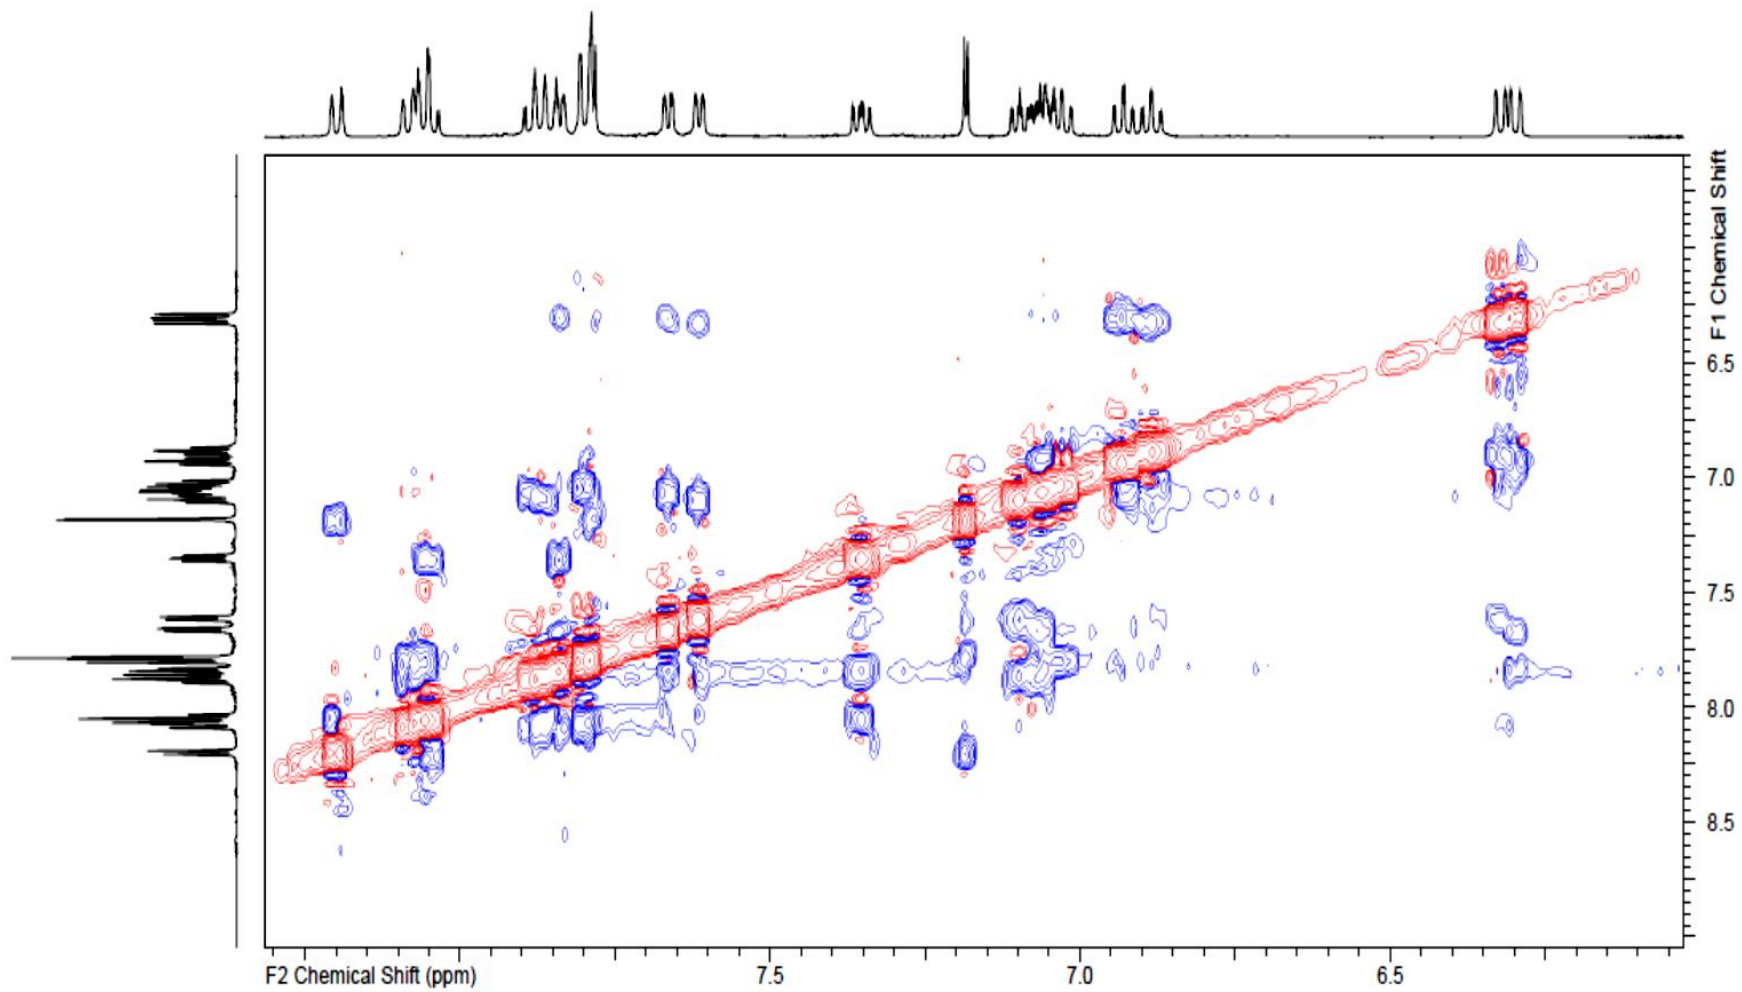

$^1\text{H}$  NMR spectrum of **2cHL<sub>2</sub>**

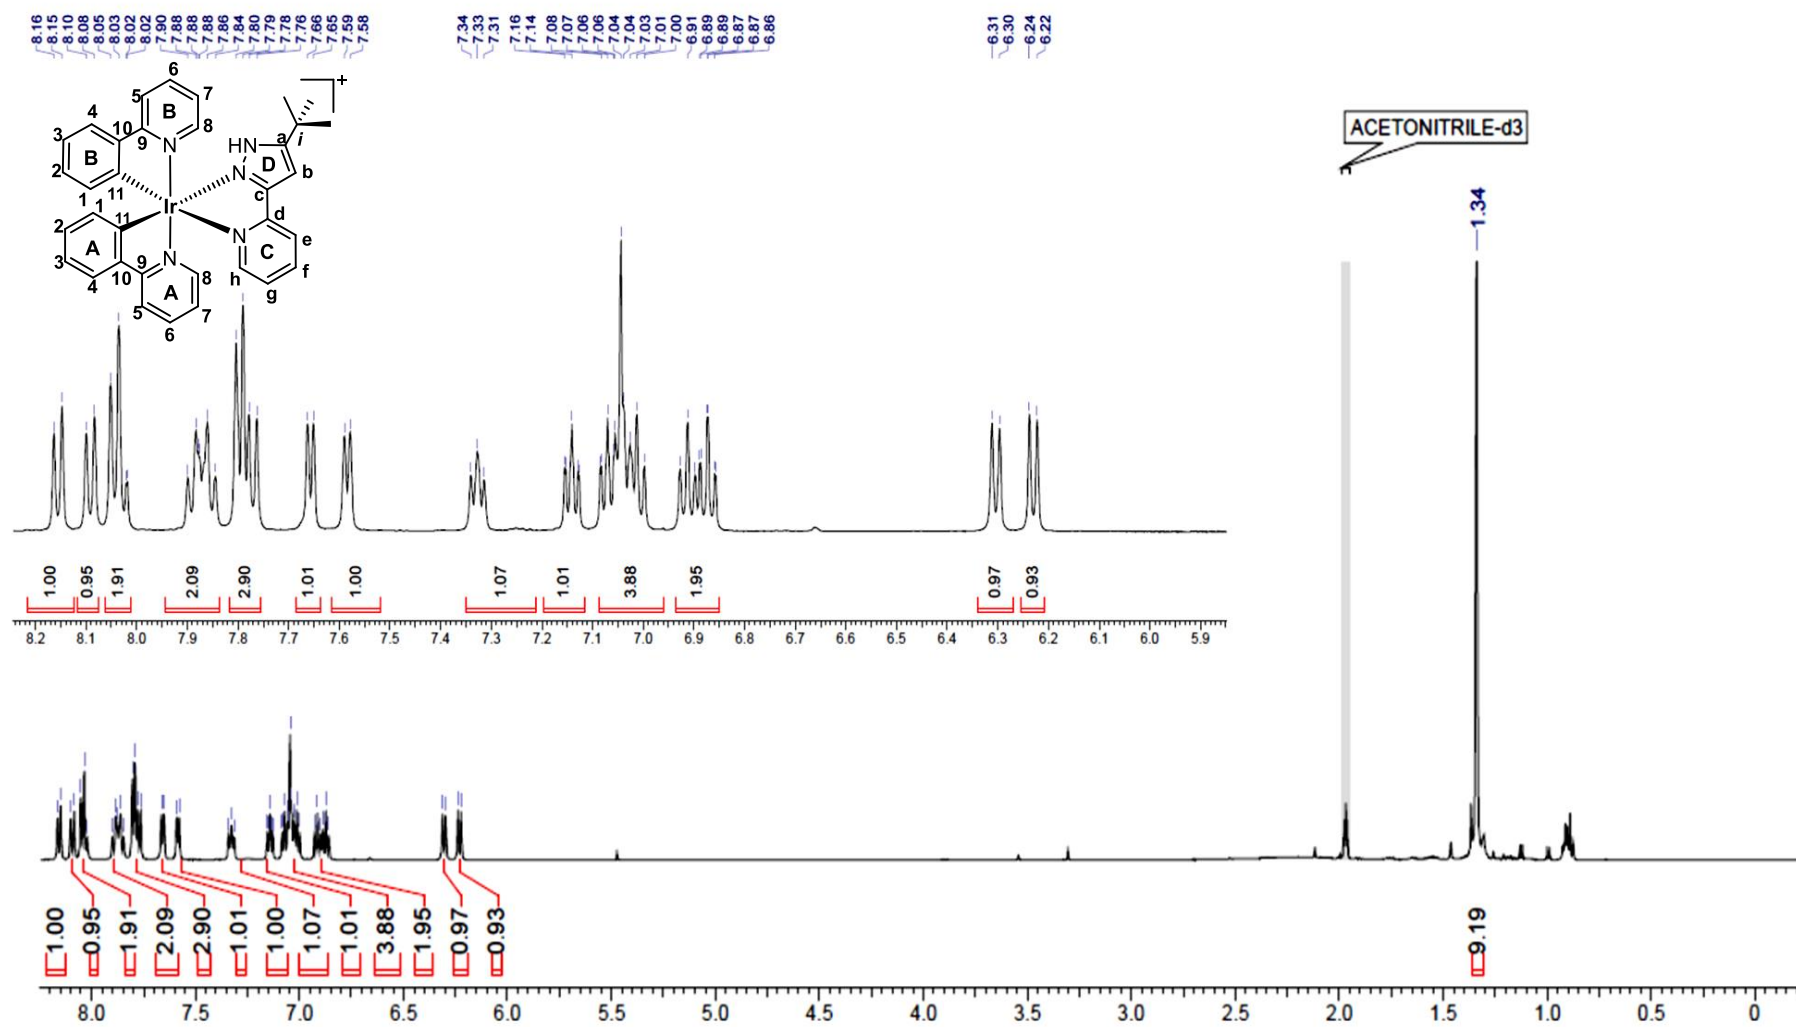

<sup>13</sup>C NMR APT spectrum of 2cHL<sub>2</sub>

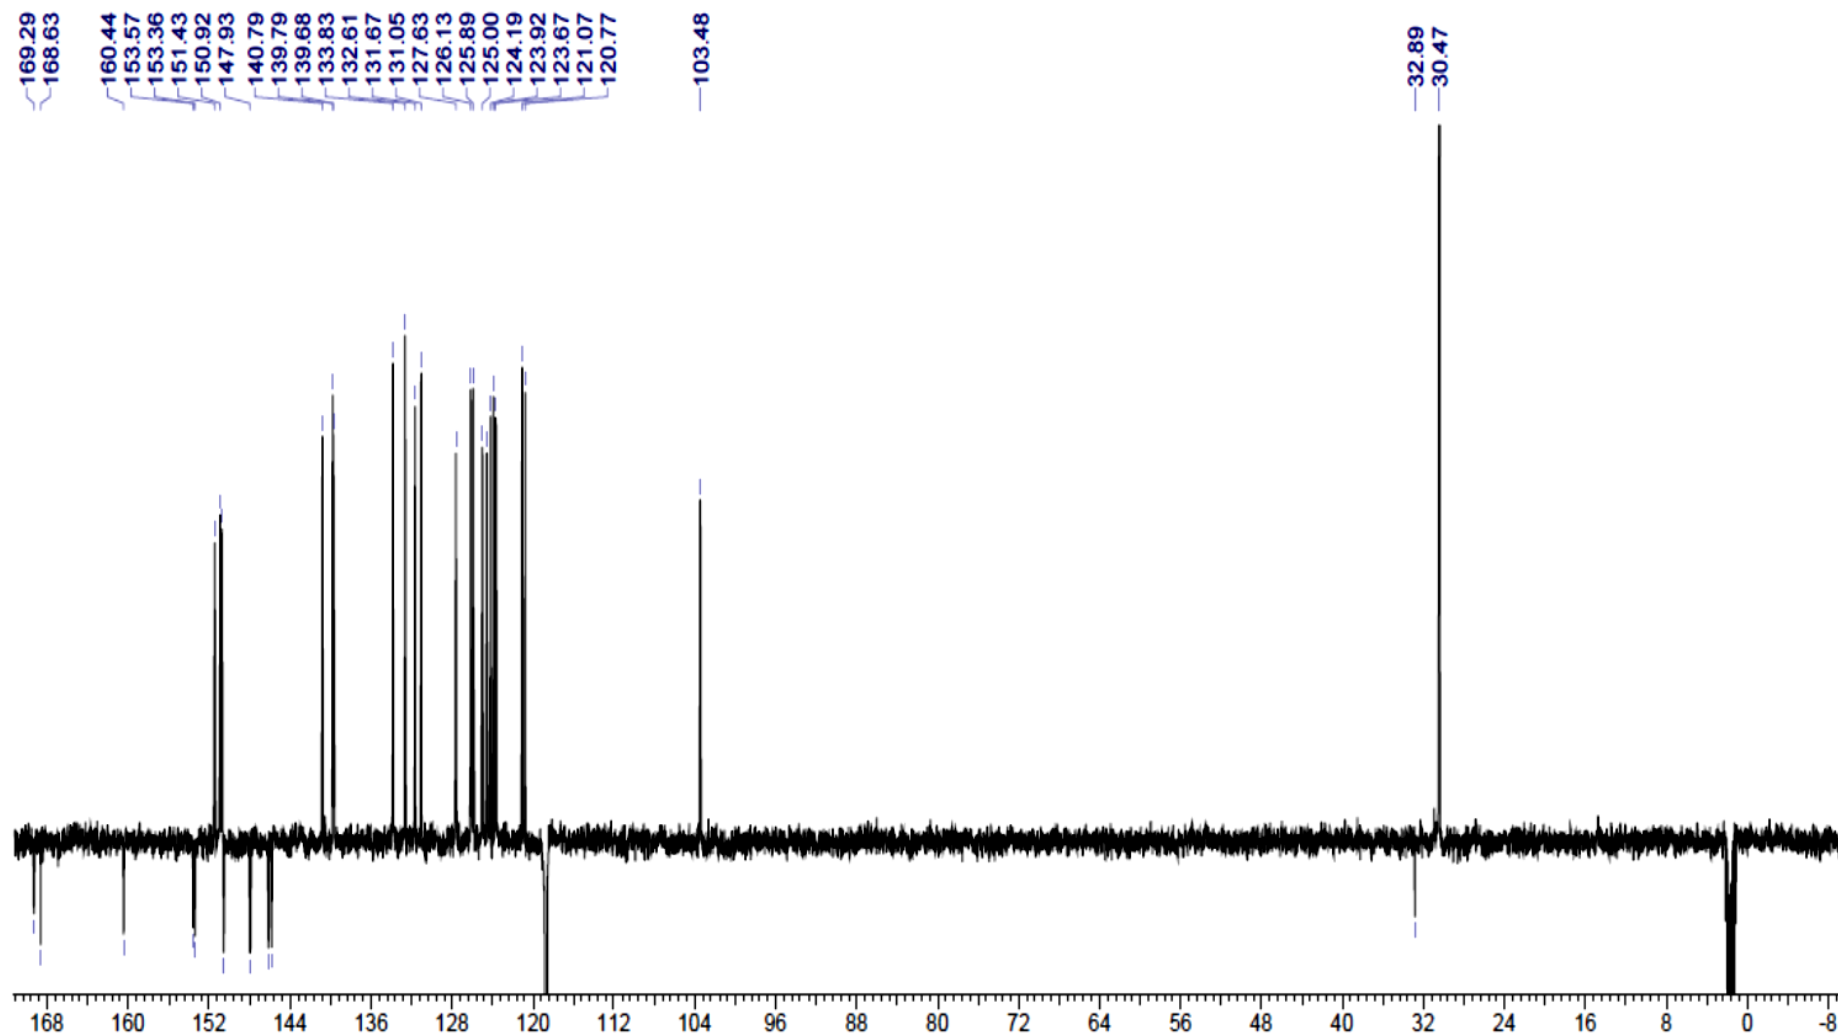

Section of  $^{13}\text{C}$  NMR APT spectrum of 2cHL<sub>2</sub>

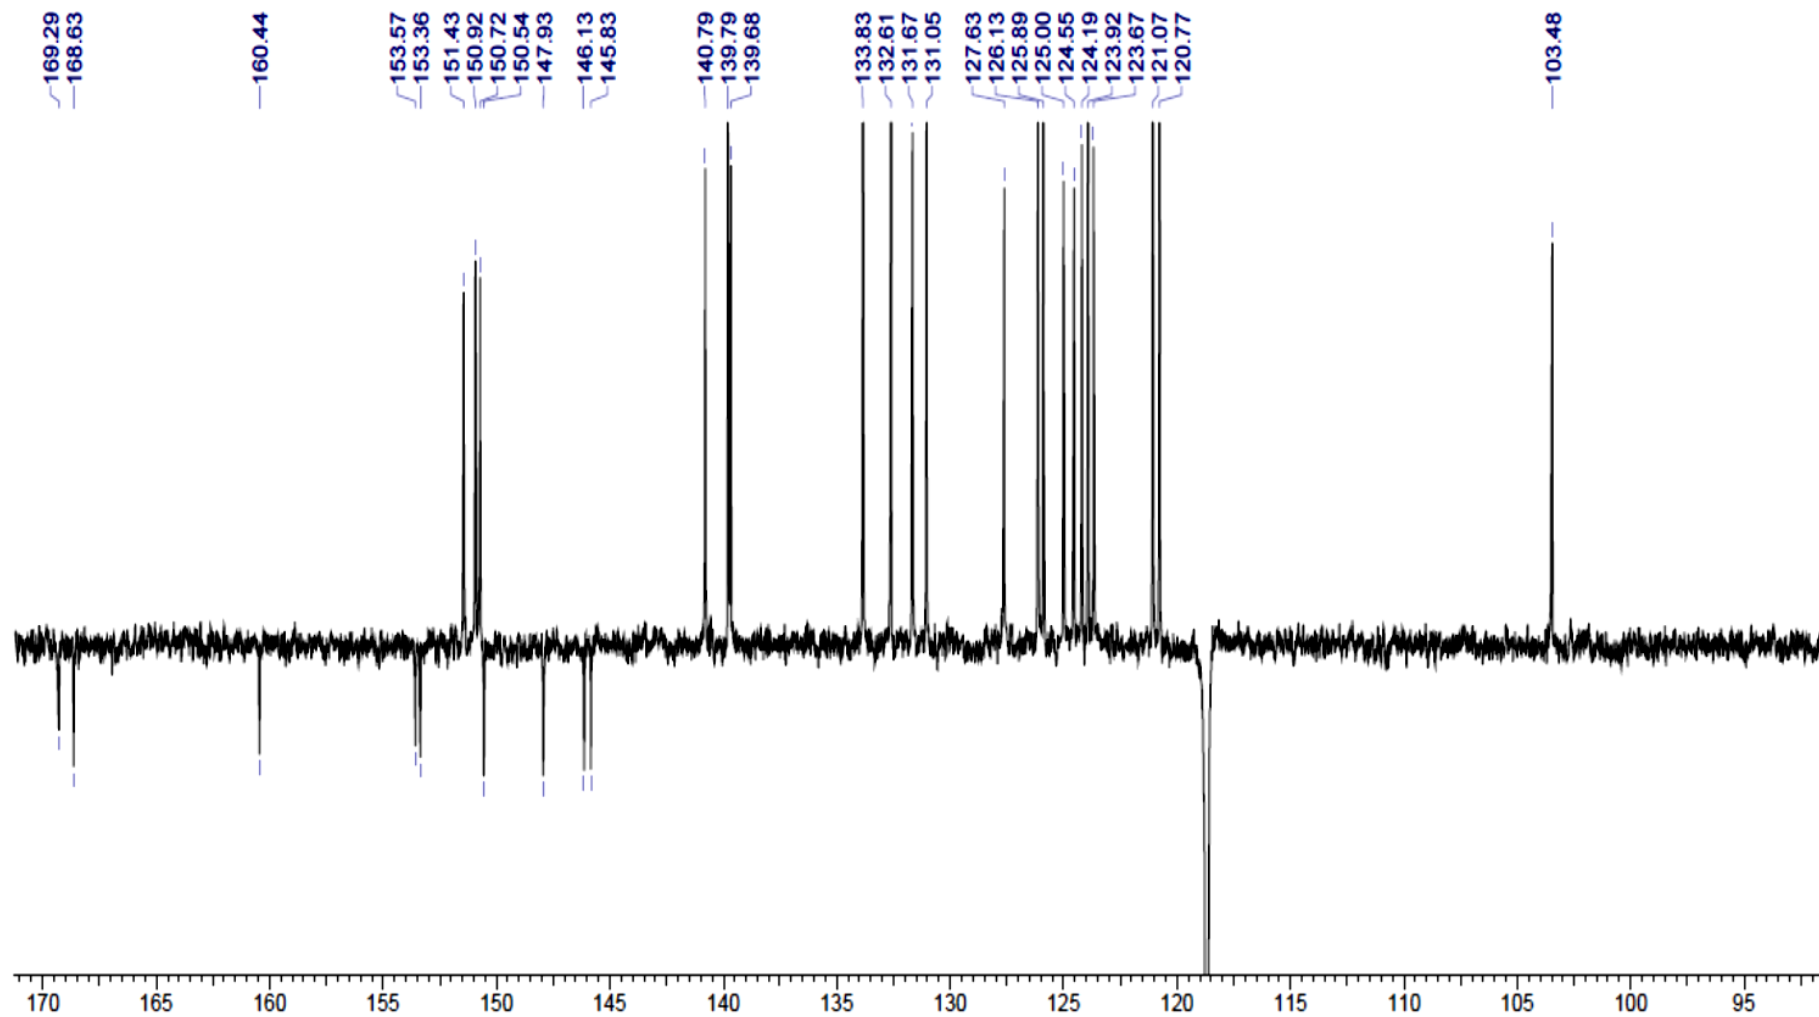



Section of the TOCSY spectrum of **2cHL<sub>2</sub>**

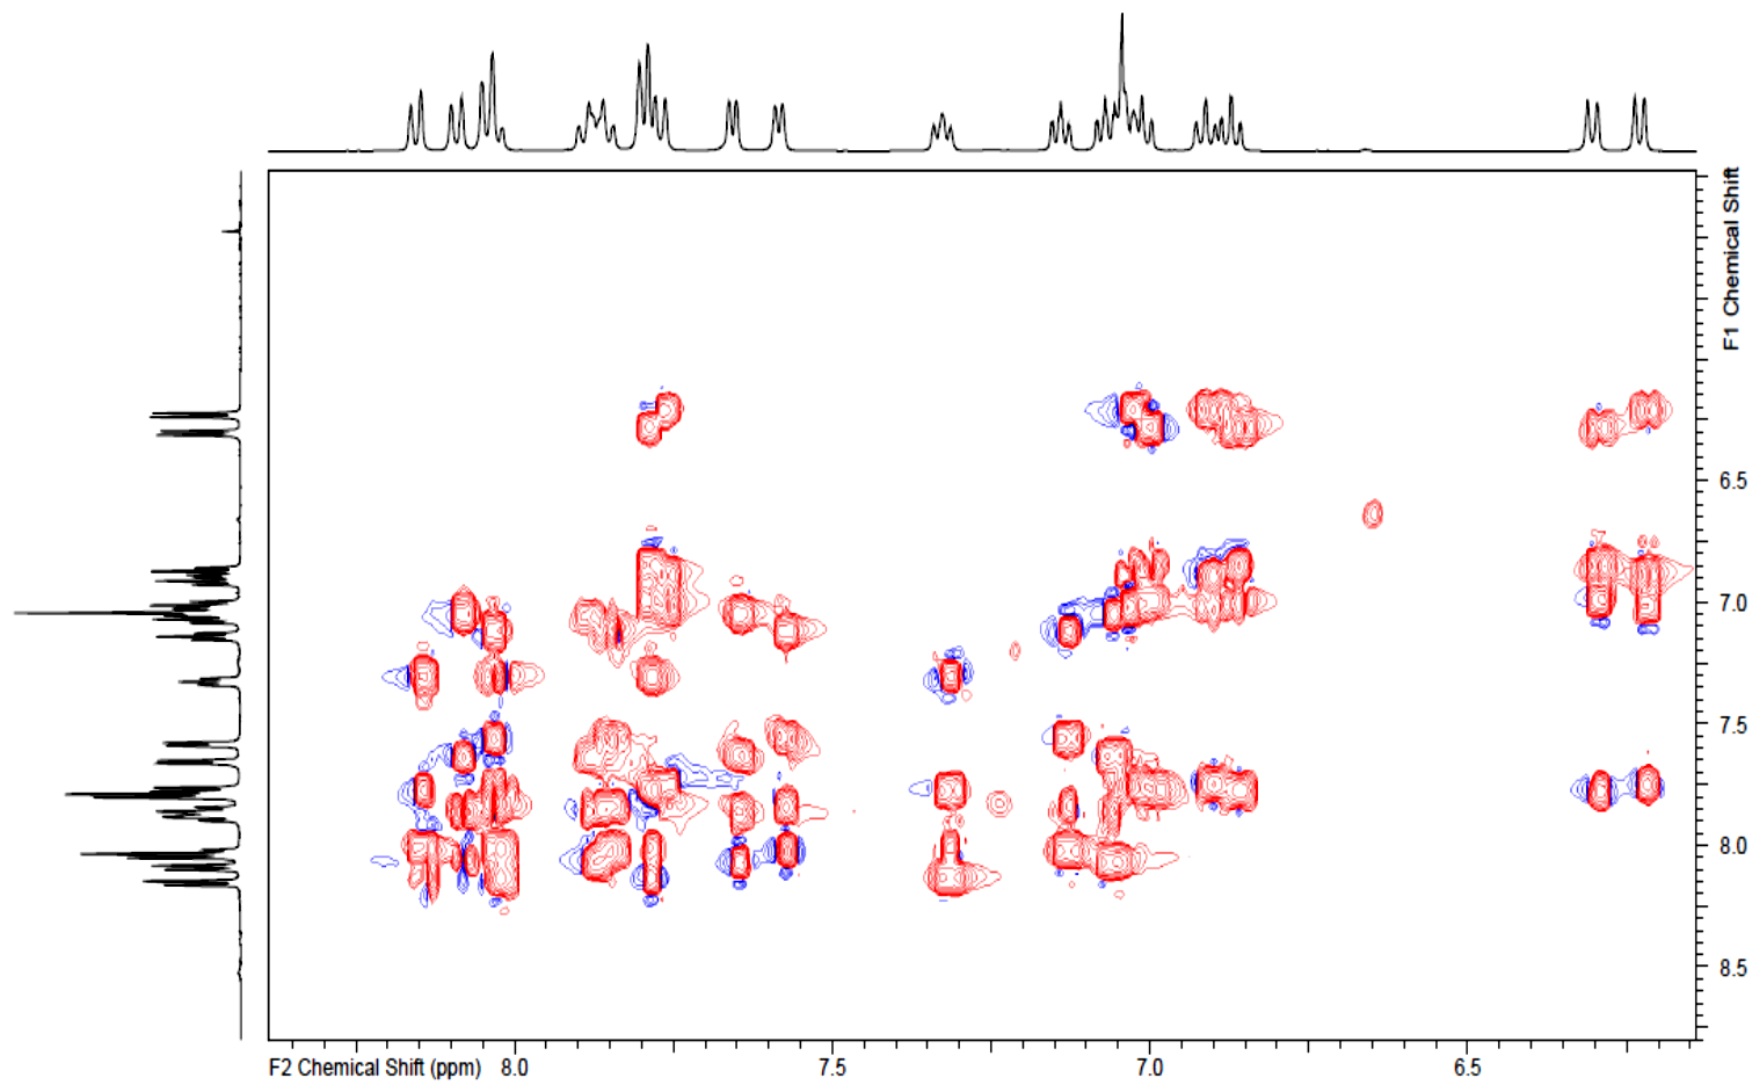

Section of the COSY spectrum of **2cHL2**

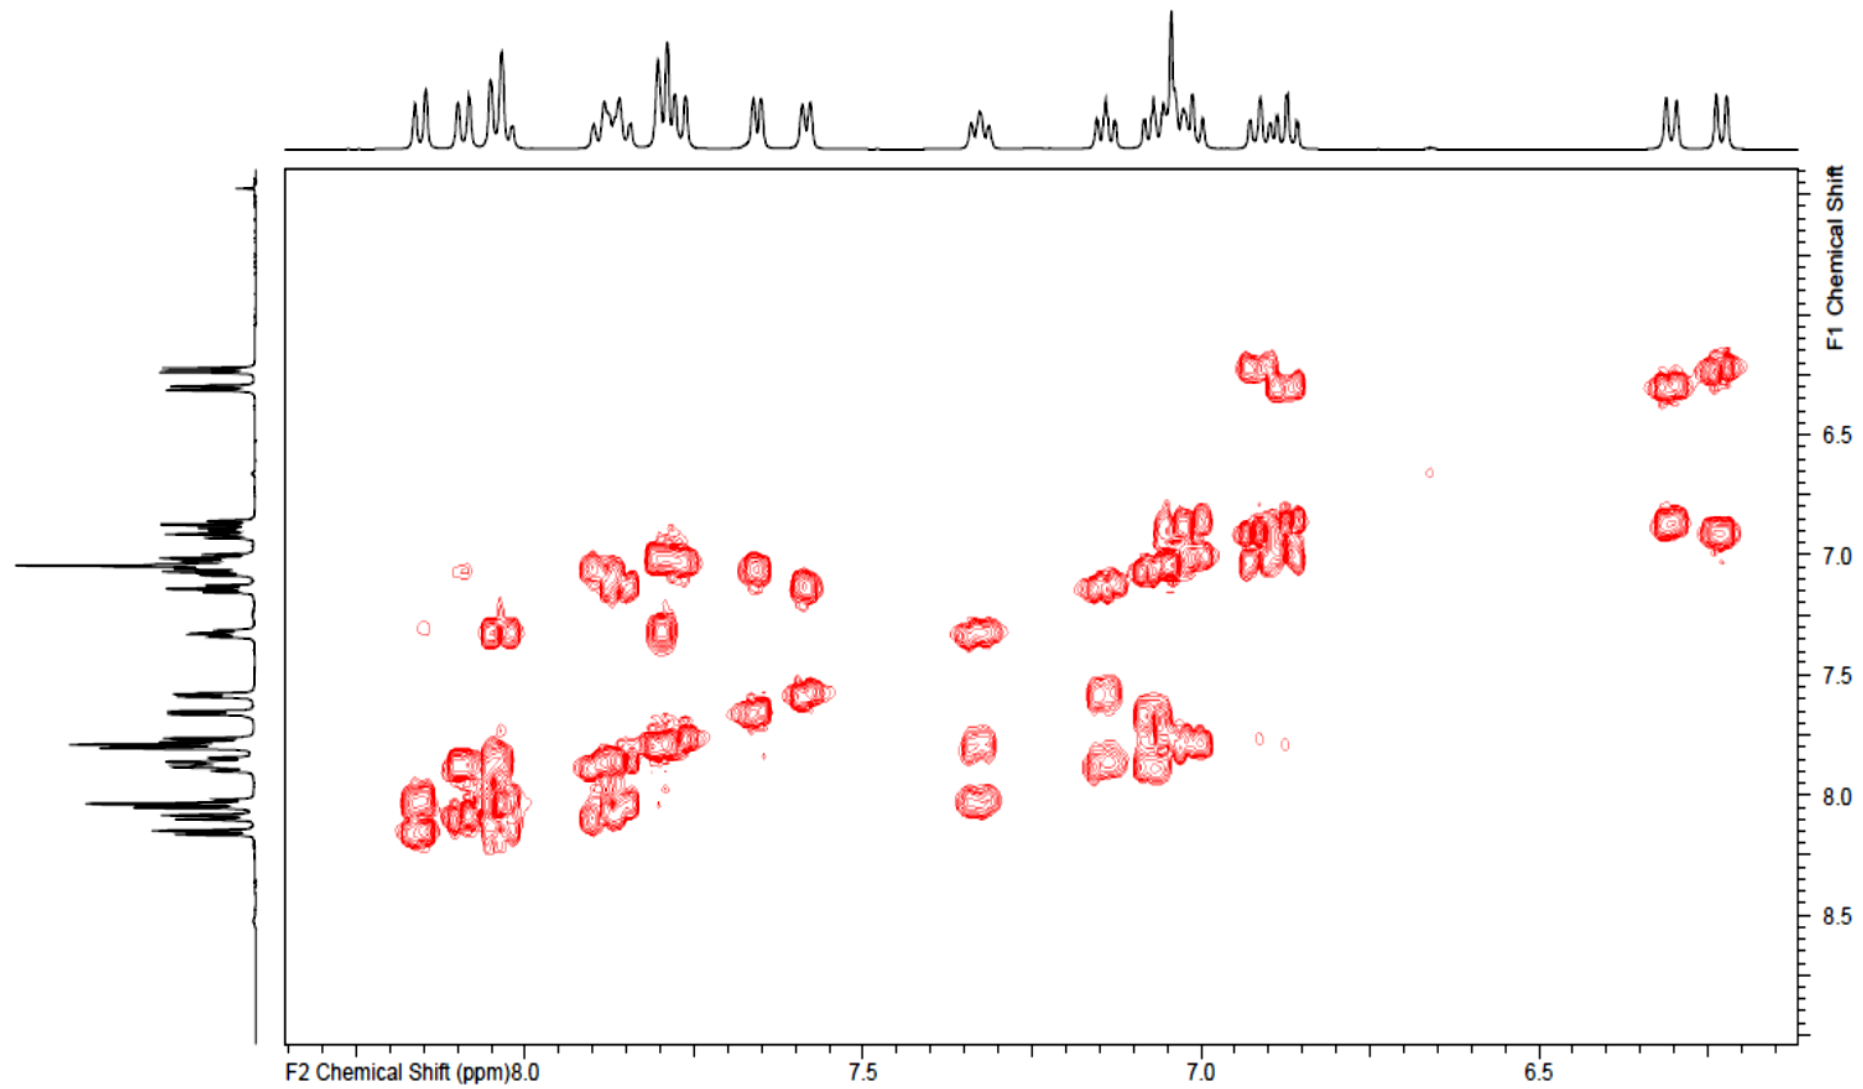

Section of the NOESY spectrum of **2cHL<sub>2</sub>**

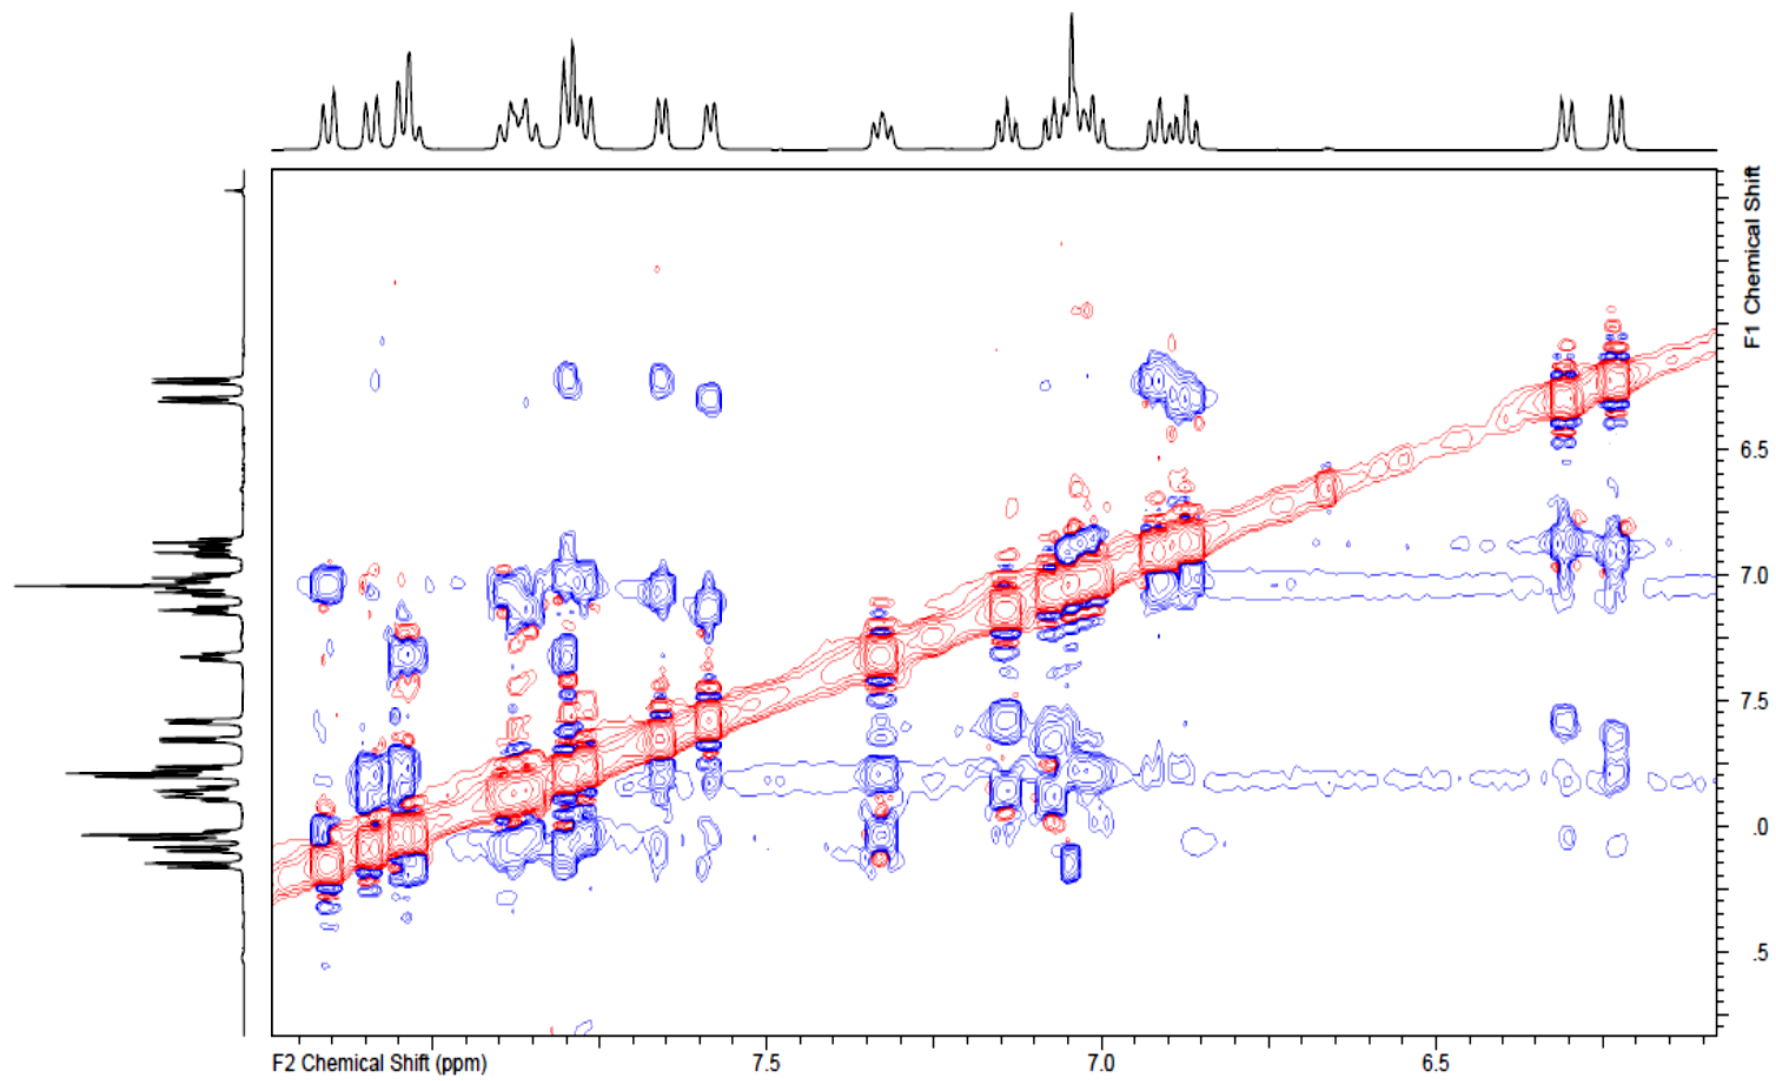

$^1\text{H}$  NMR spectrum of **2cHL3**

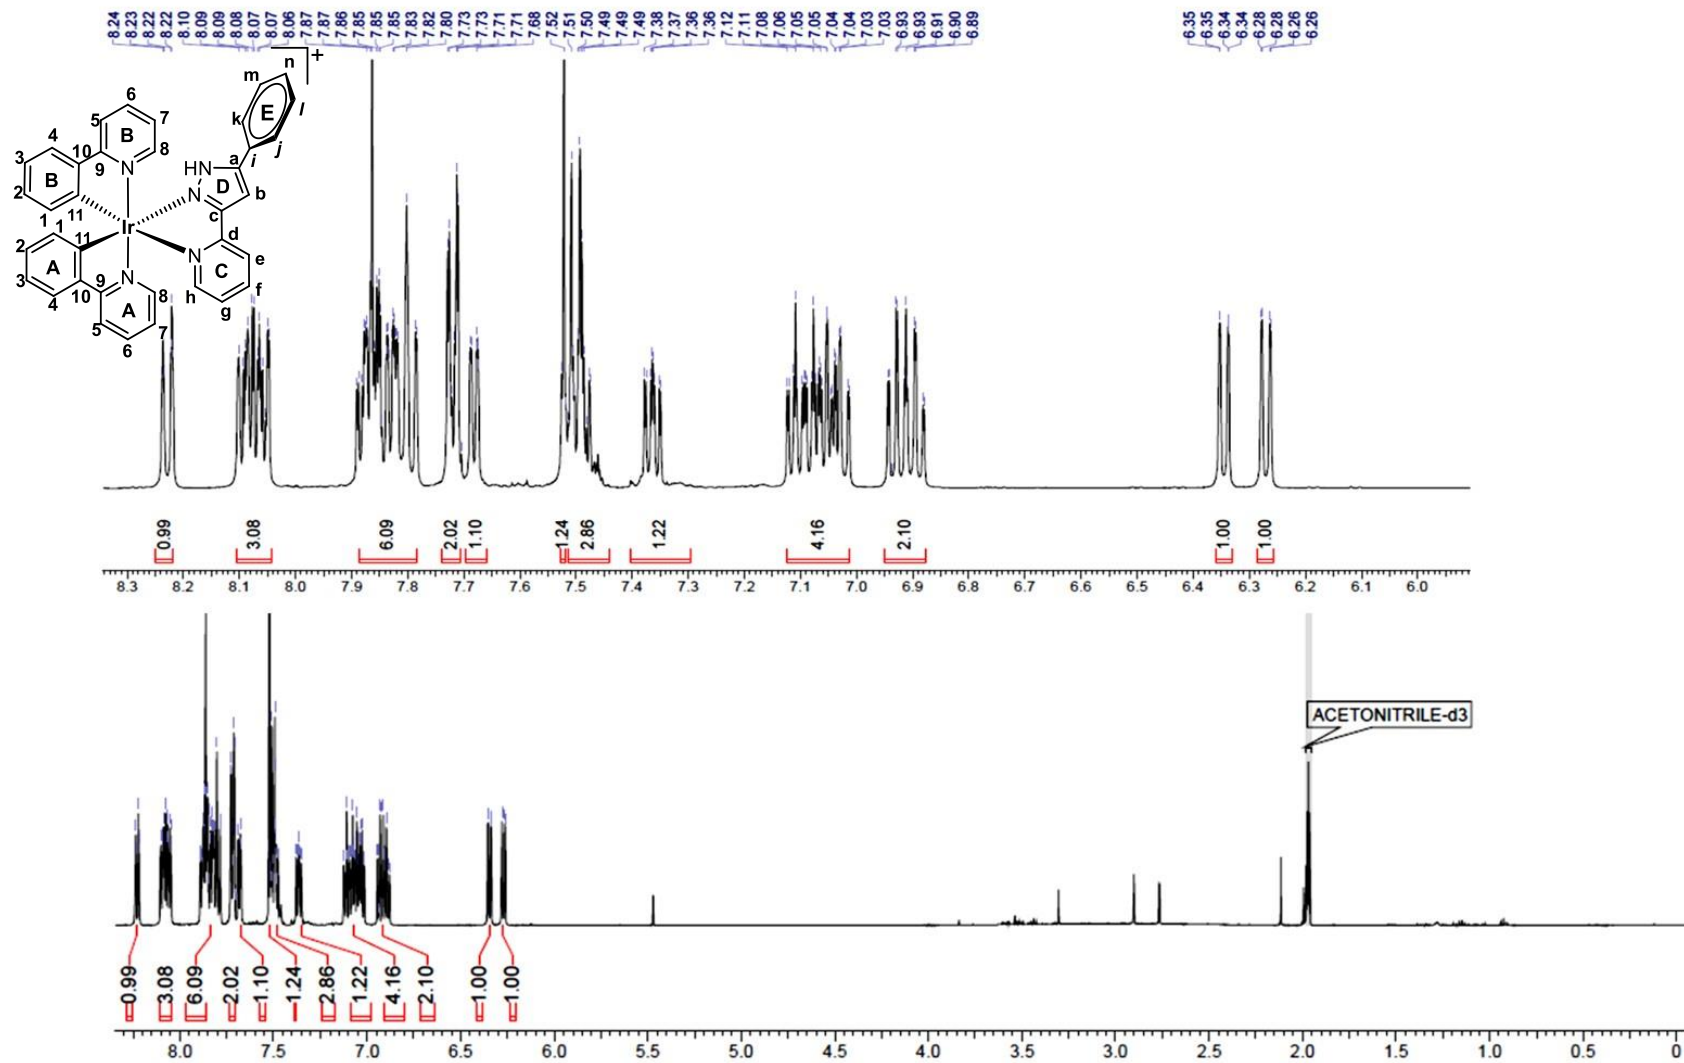

$^{13}\text{C}$  NMR APT spectrum of 2cHL<sub>3</sub>

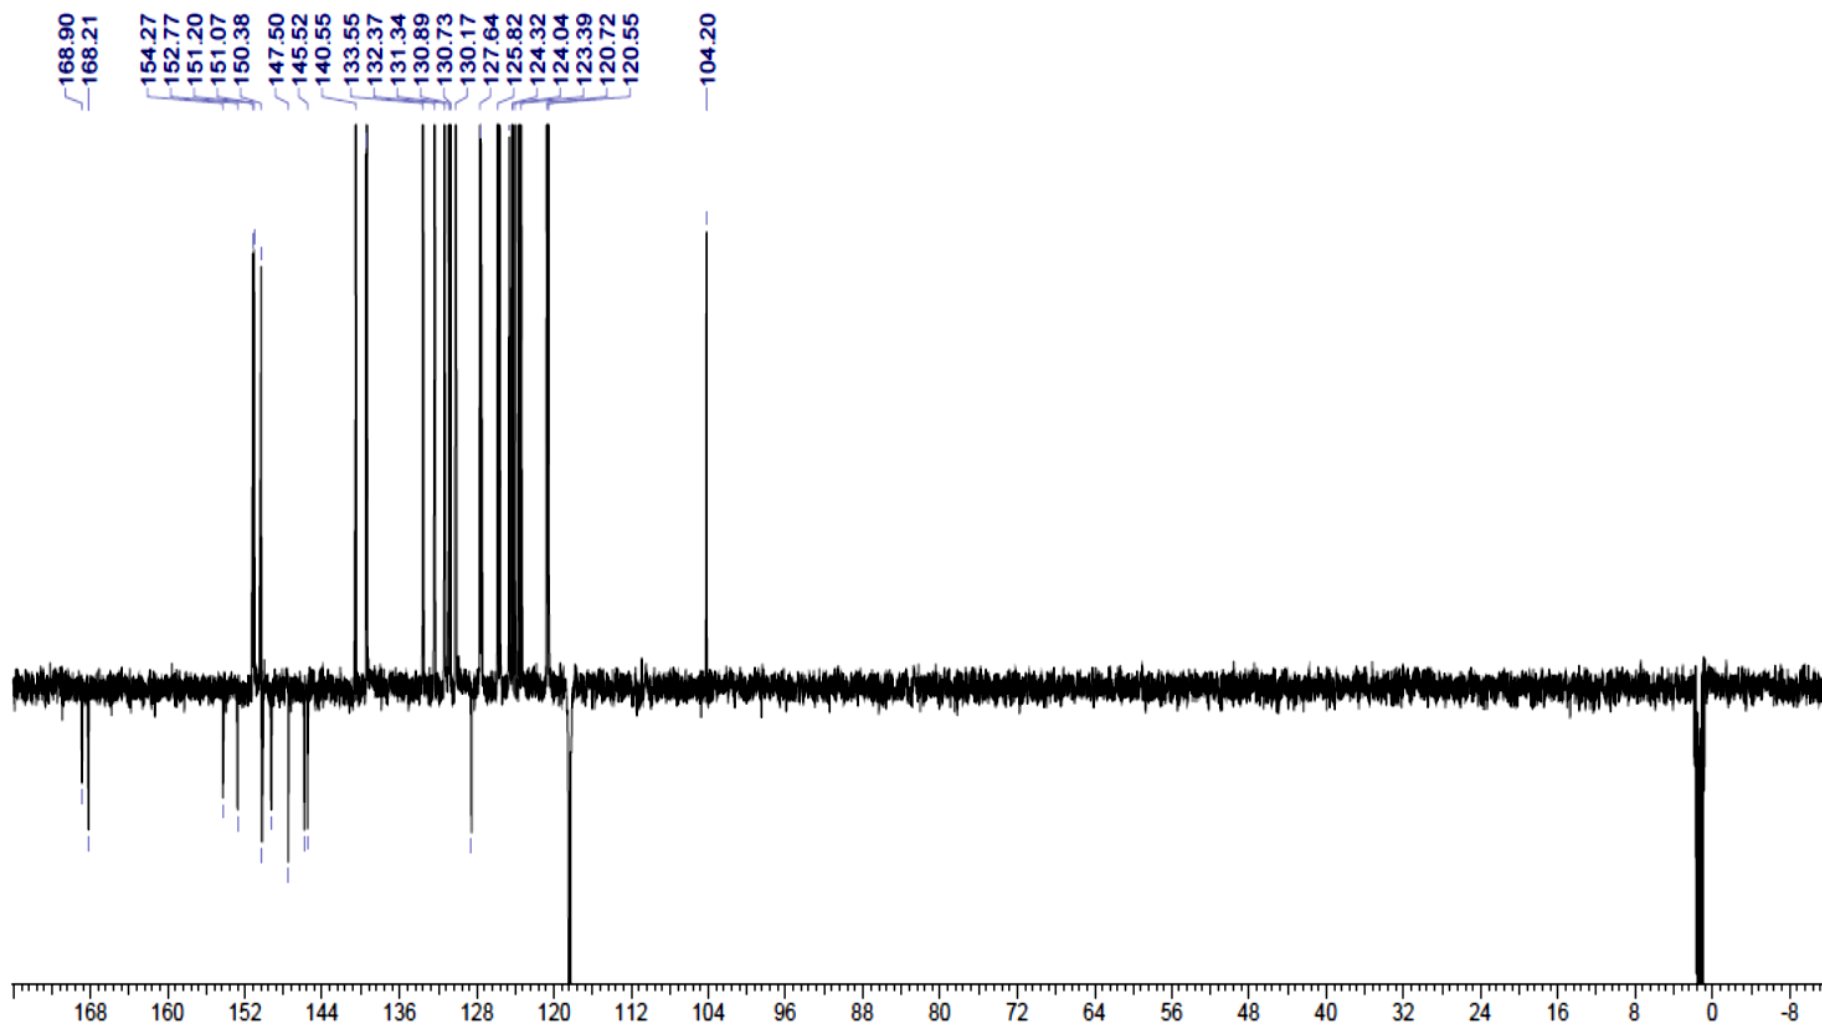

Section of  $^{13}\text{C}$  NMR APT spectrum of **2cHL<sub>3</sub>**

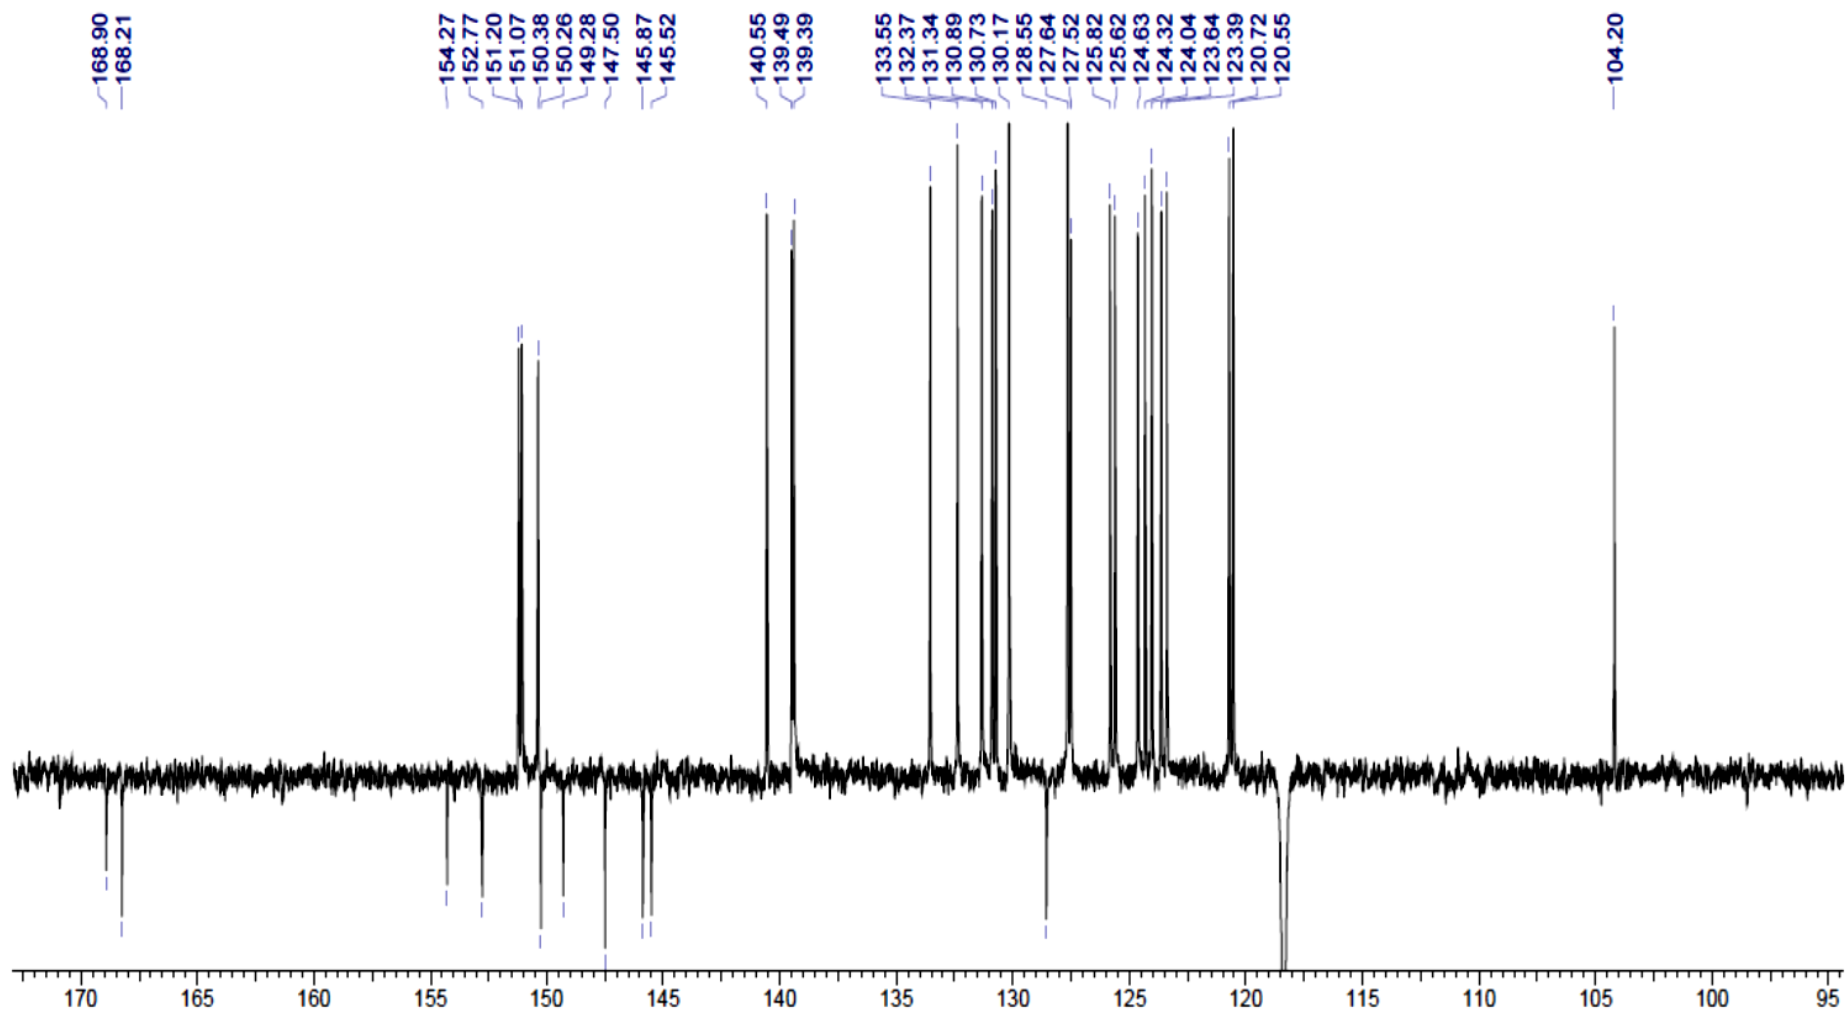

Section of the TOCSY spectrum of **2cHL<sub>3</sub>**

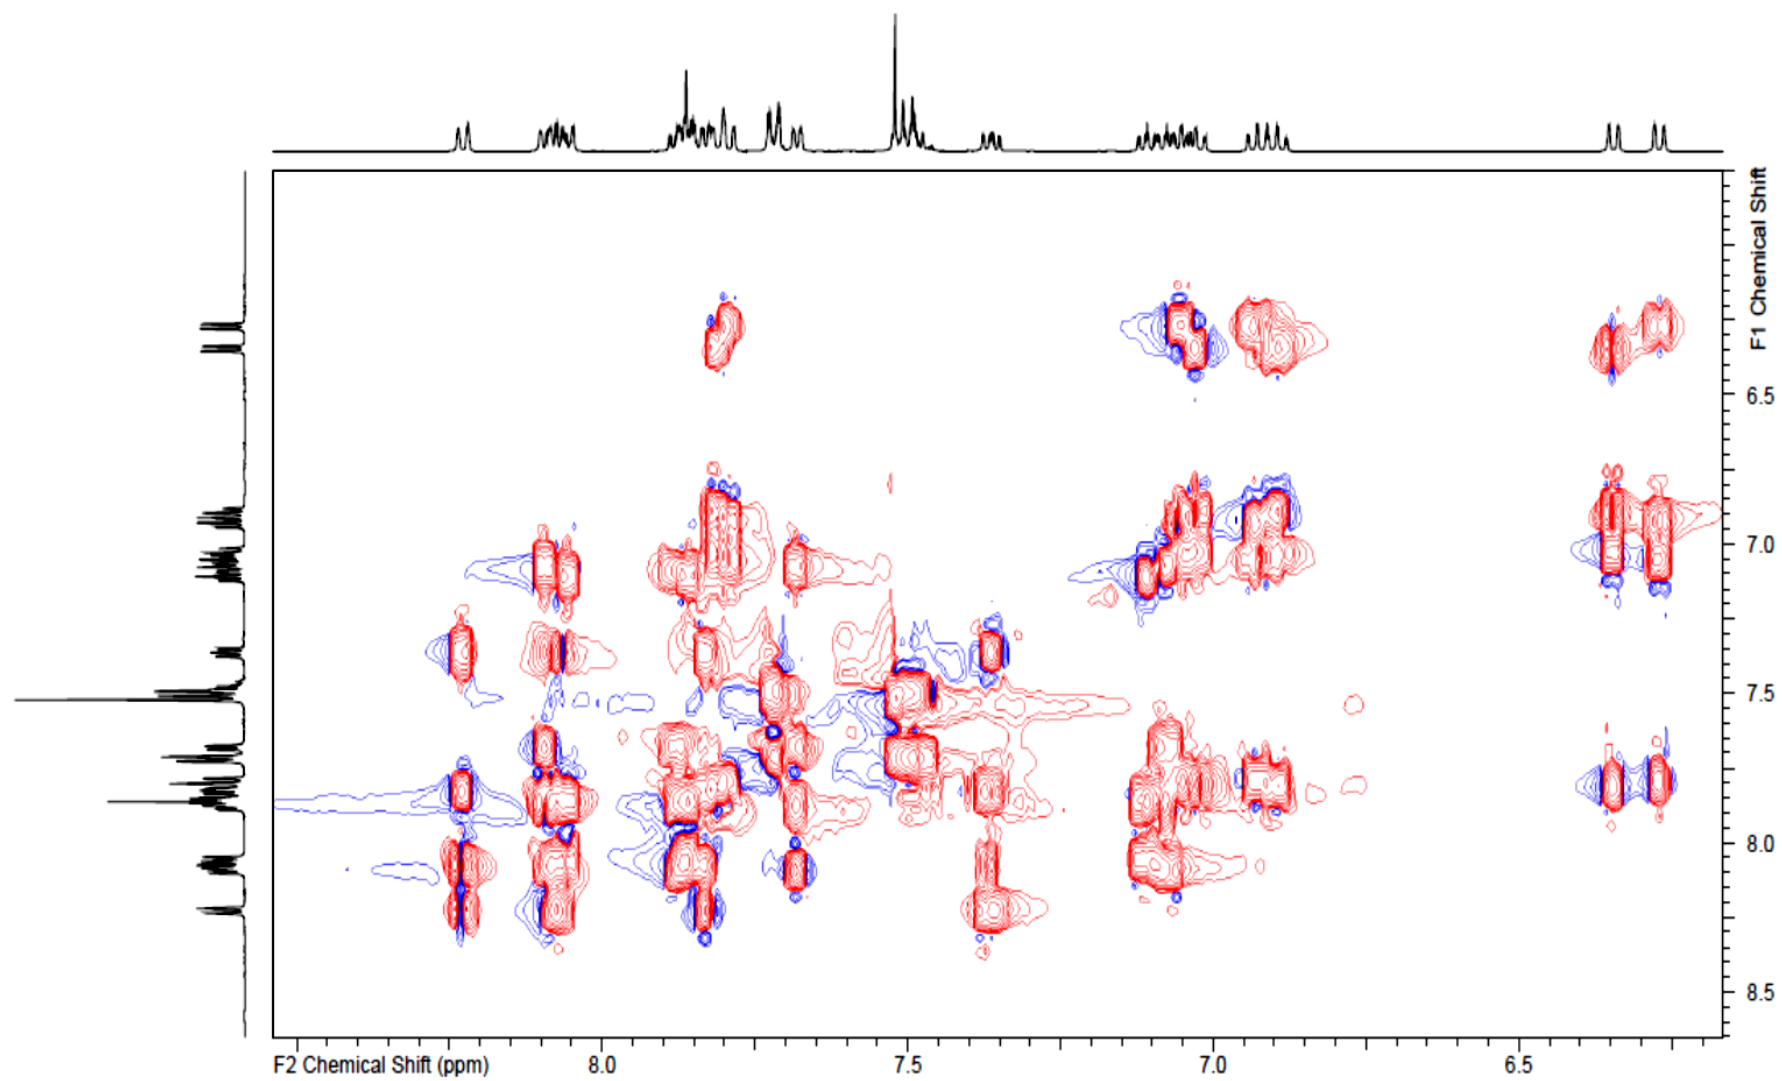

Section of the COSY spectrum of **2cHL<sub>3</sub>**

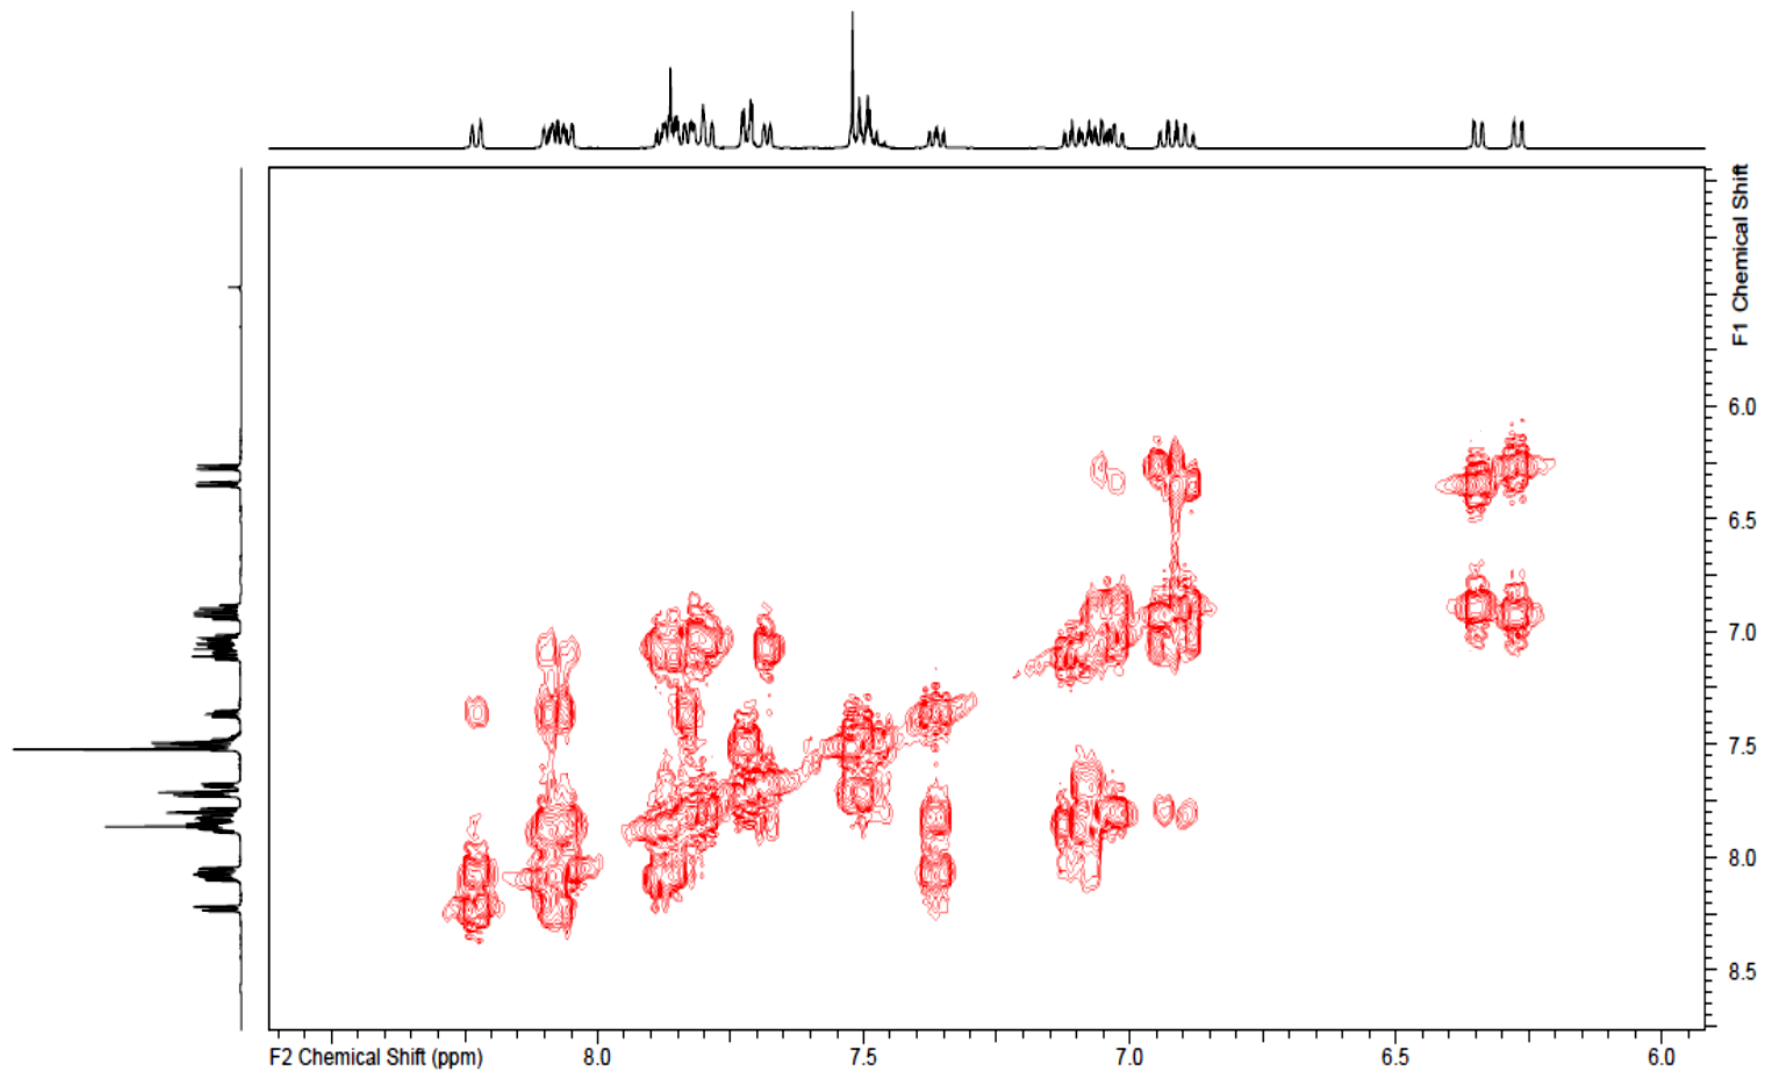



Section of the NOESY spectrum of **2cHL<sub>3</sub>**

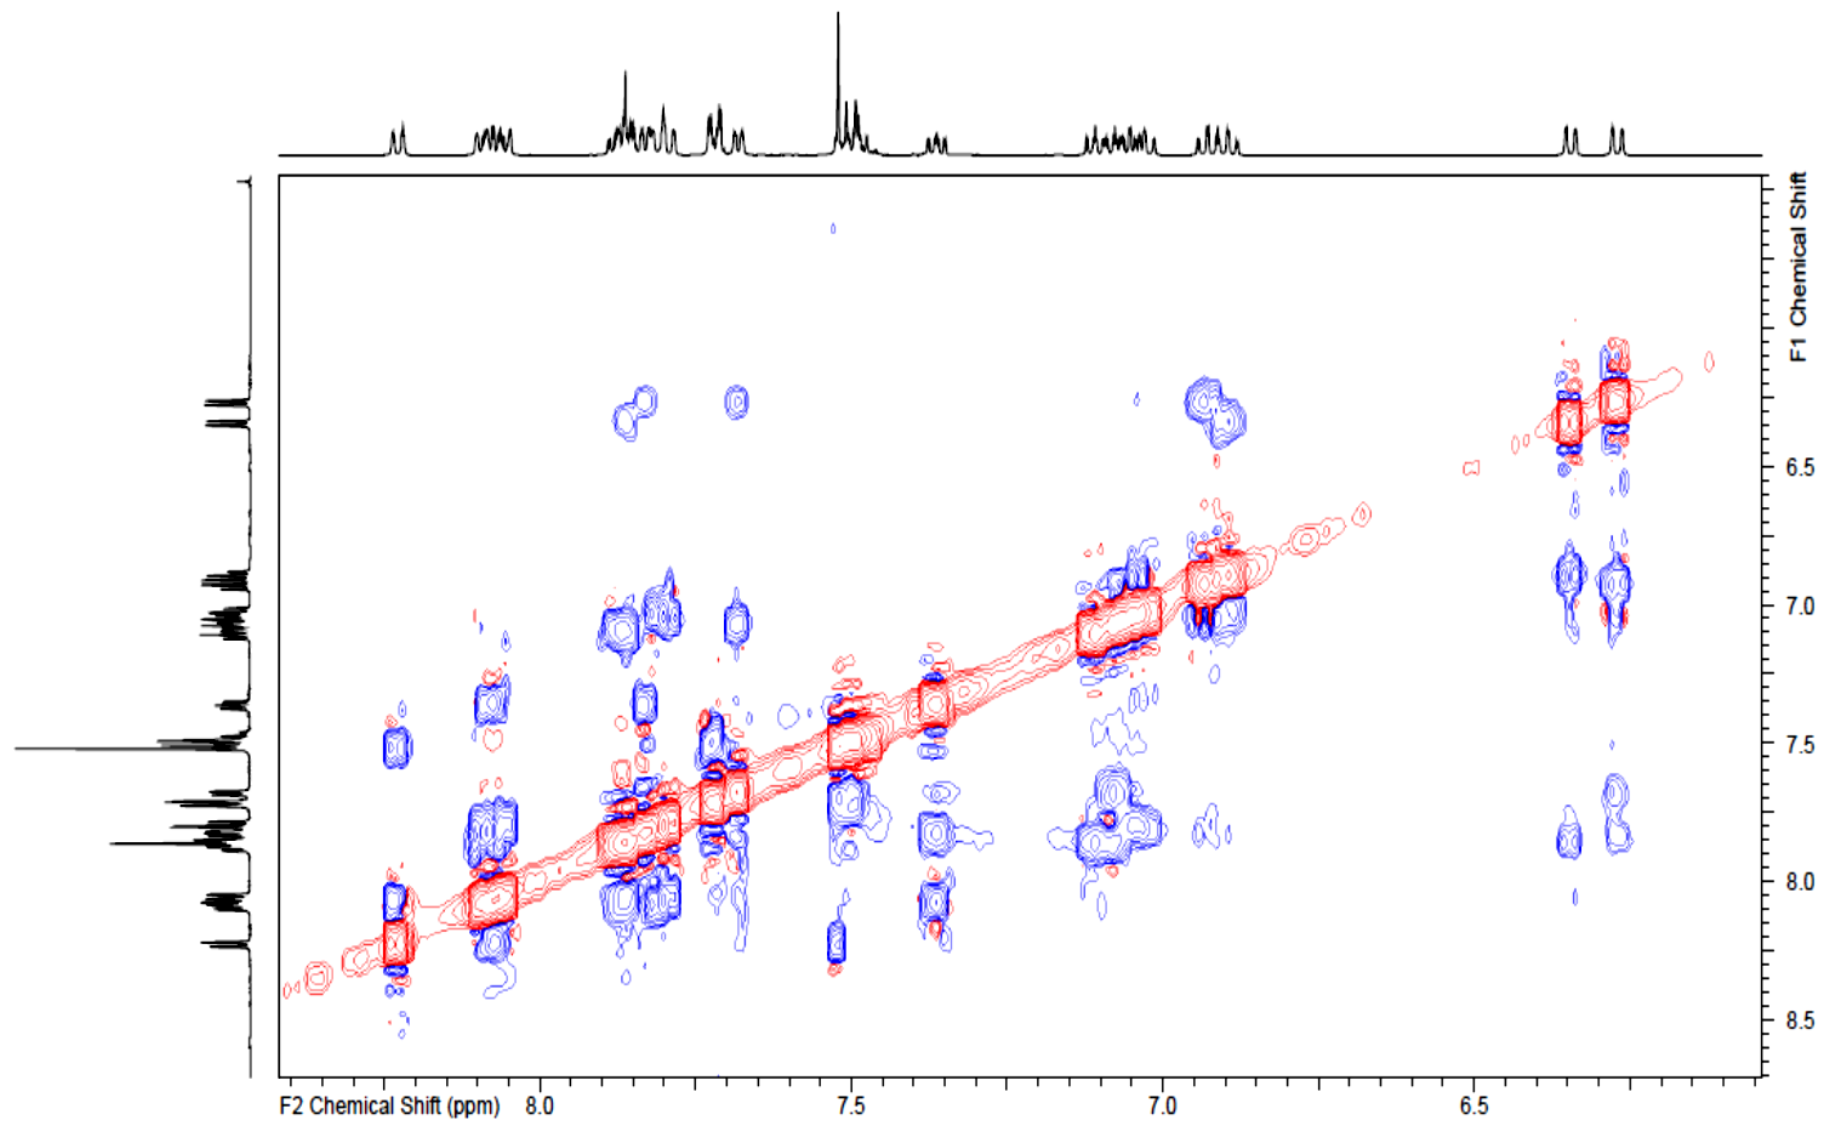

$^1\text{H}$  NMR spectrum of **3cL1**

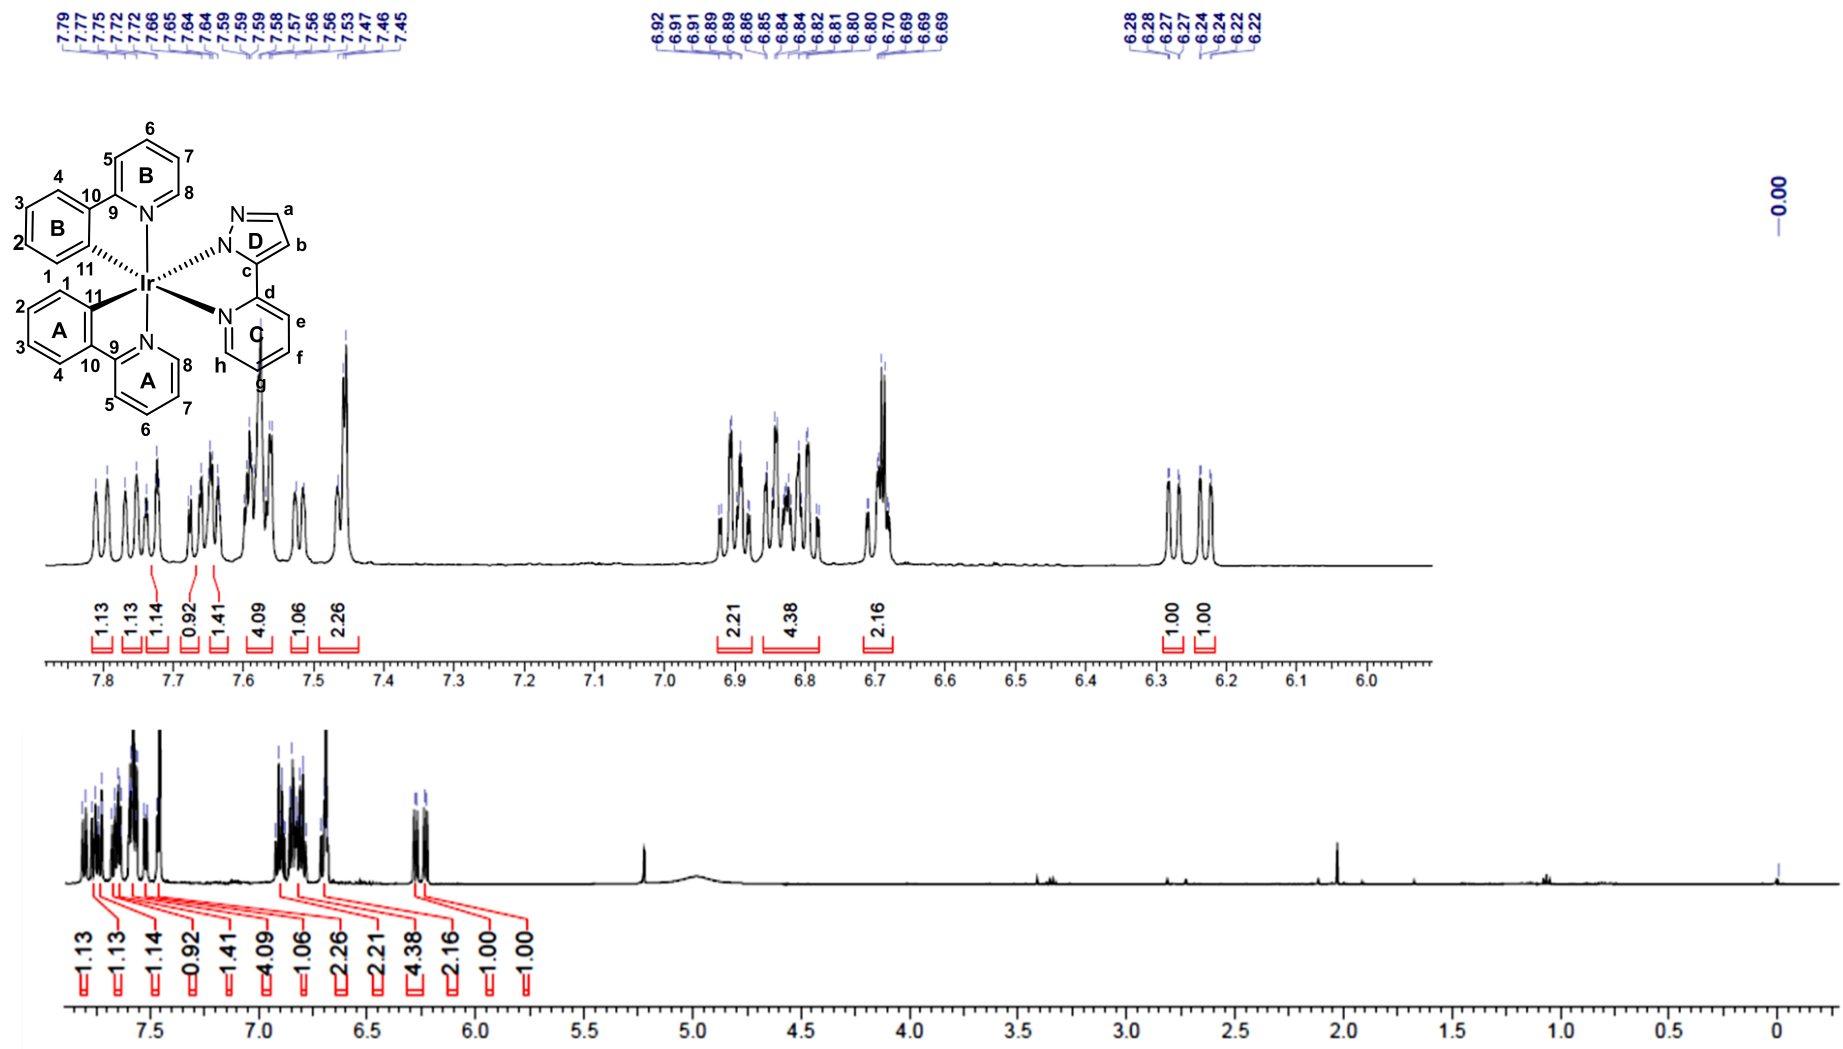

$^{13}\text{C}$  NMR DEPT spectrum of **3cL1**

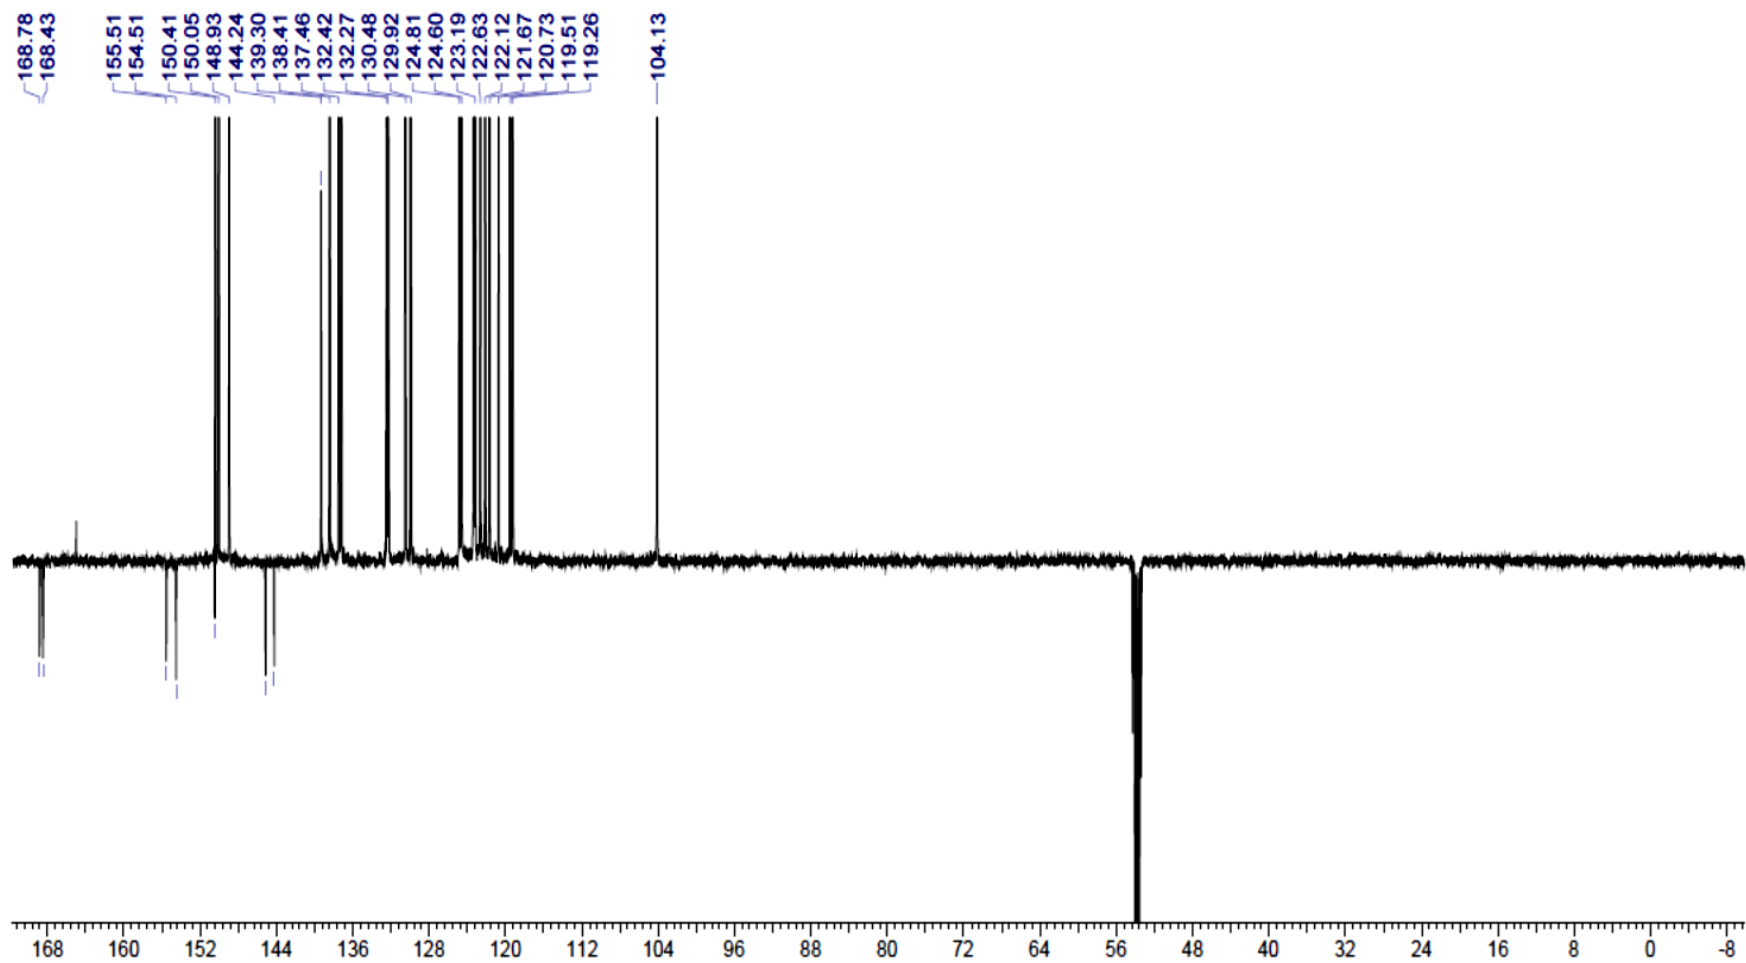

Section of  $^{13}\text{C}$  NMR DEPT spectrum of **3cL<sub>1</sub>**

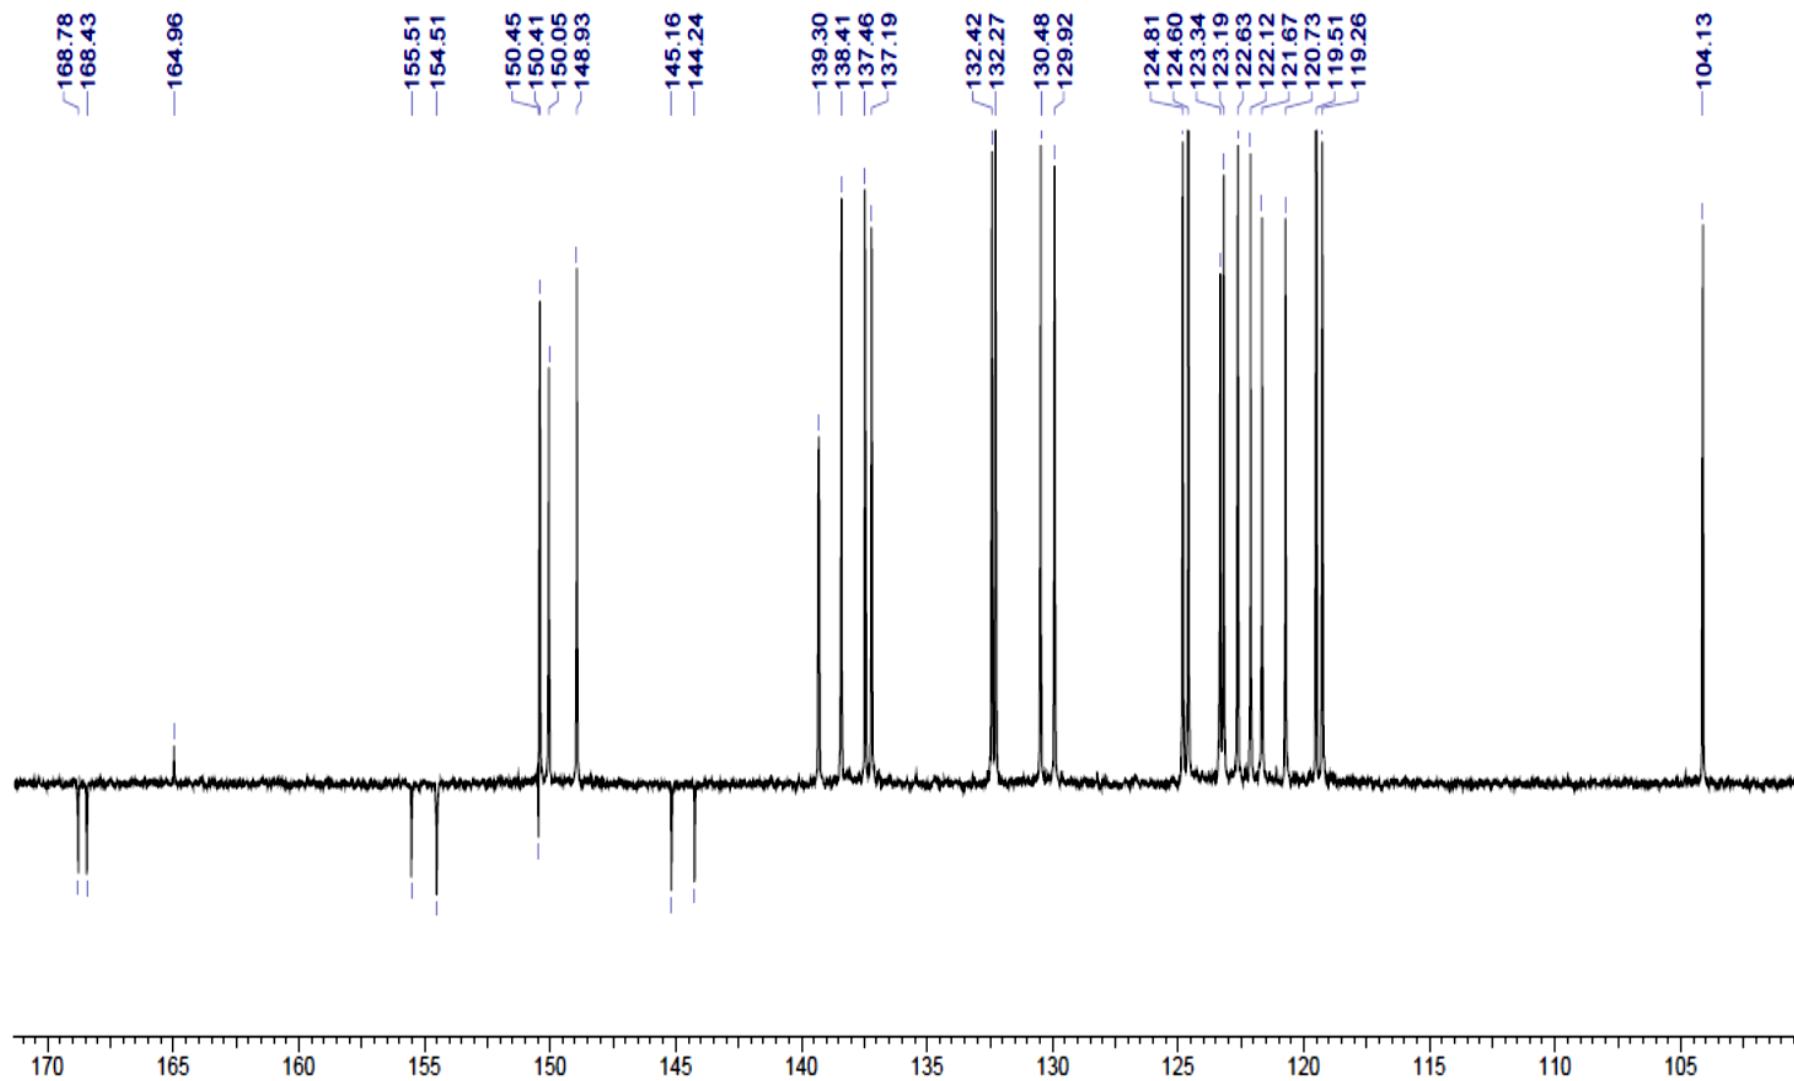

Section of the TOCSY spectrum of **3cL1**

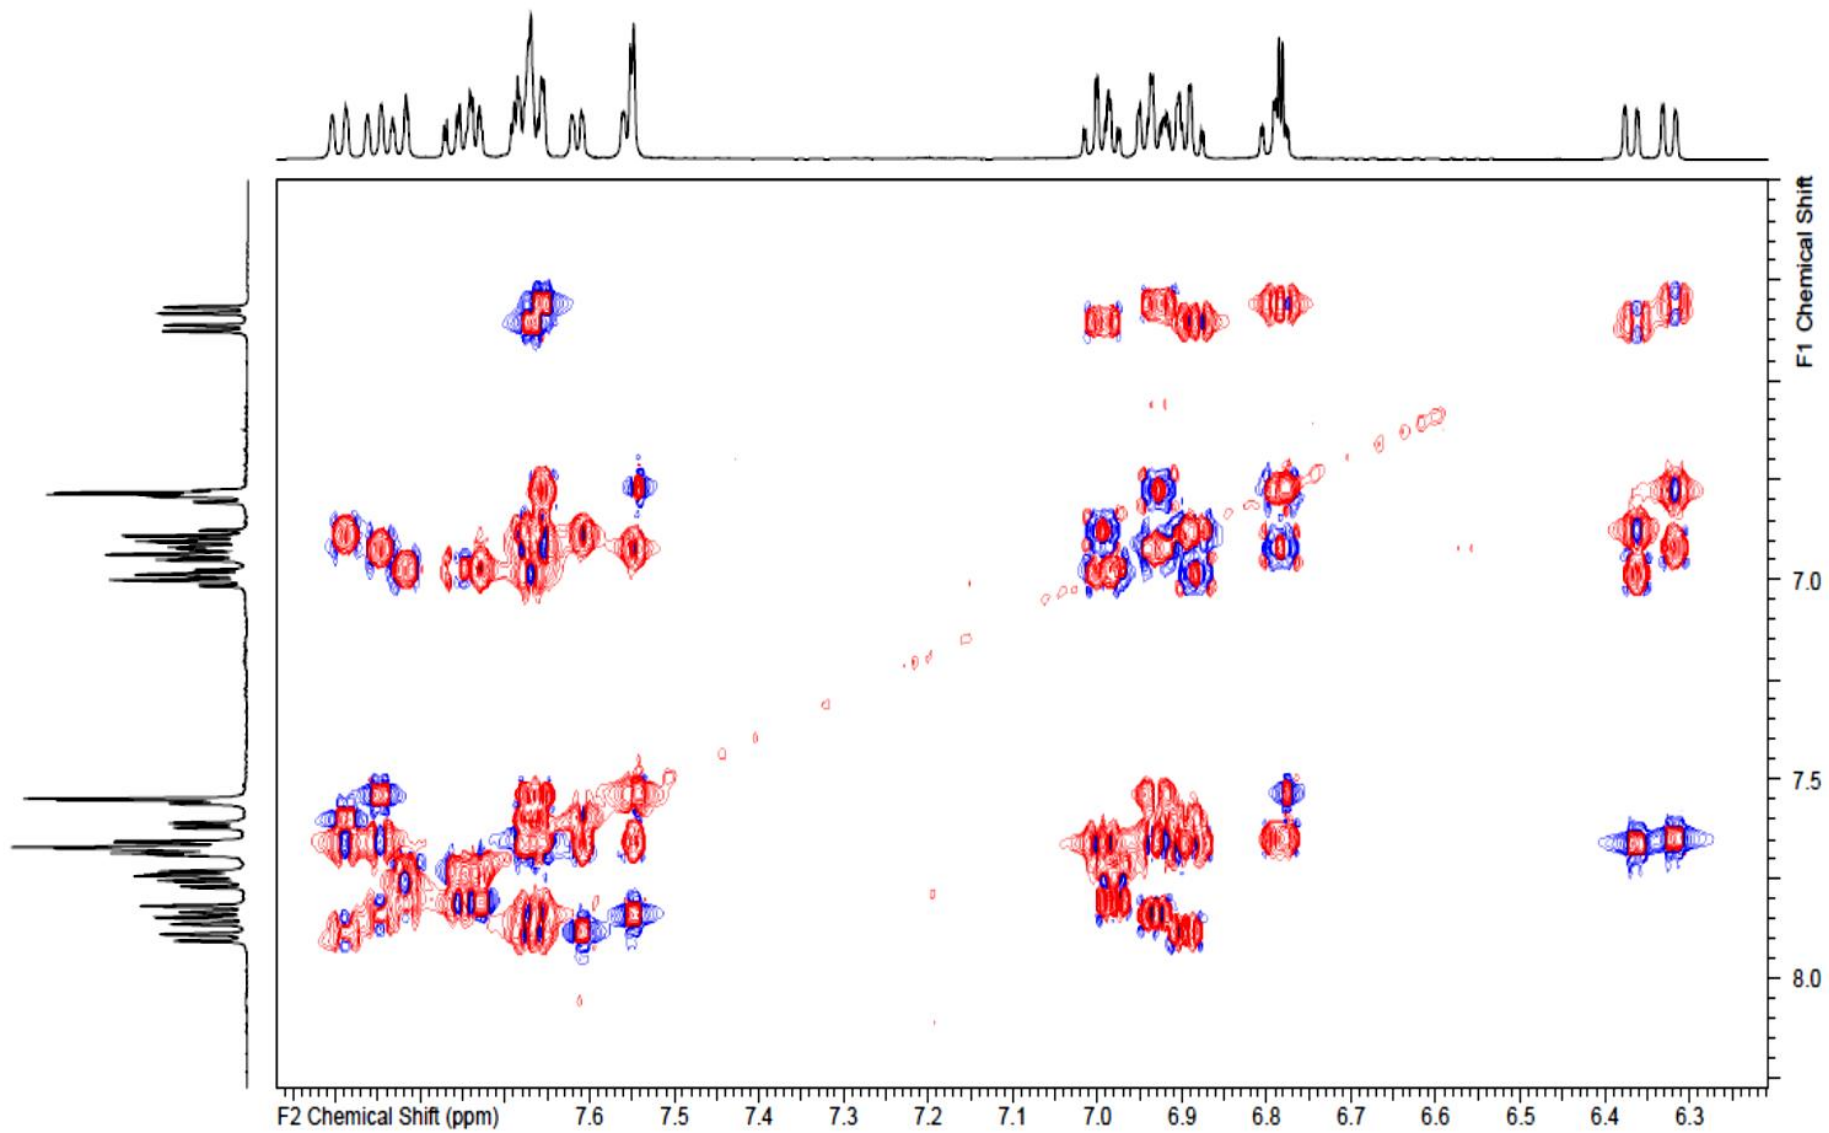

Section of the COSY spectrum of **3cL1**

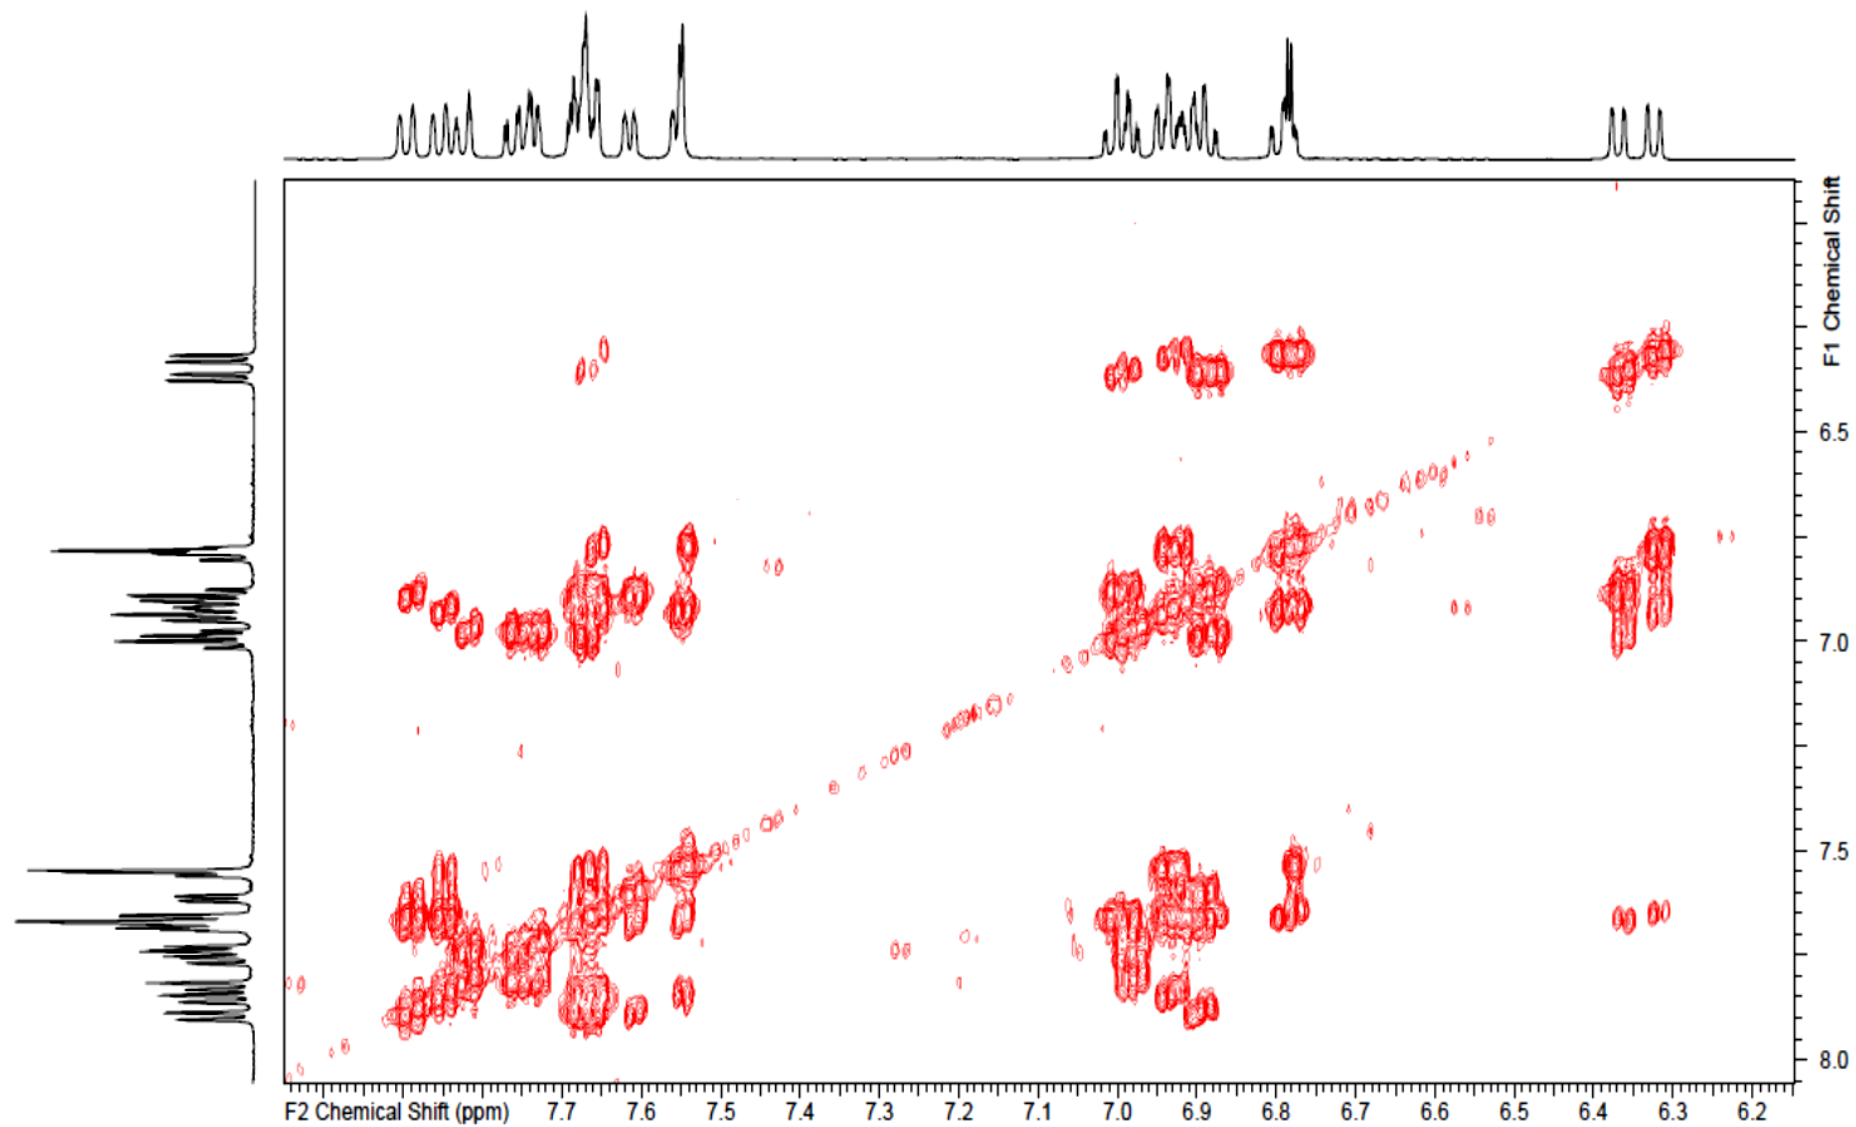

Section of the NOESY spectrum of **3cL1**

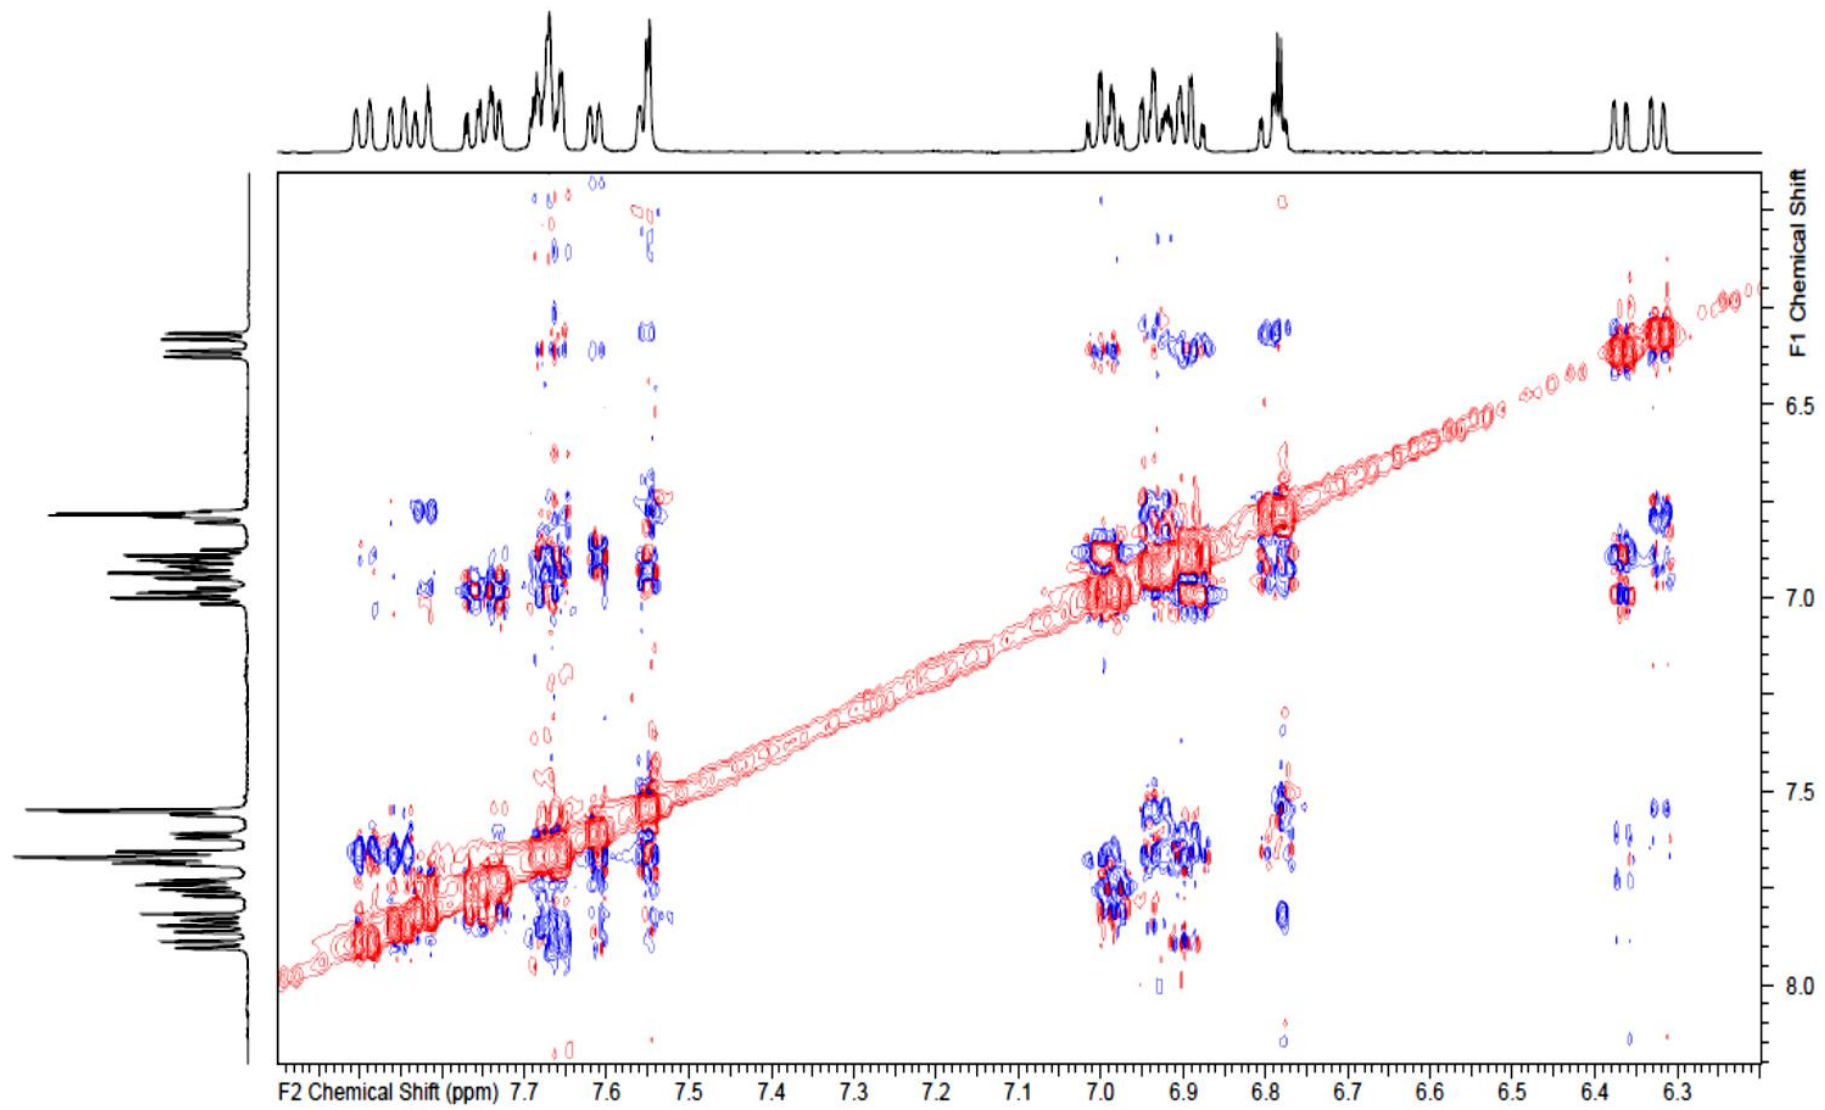

$^1\text{H}$  NMR spectrum of **3cL2**

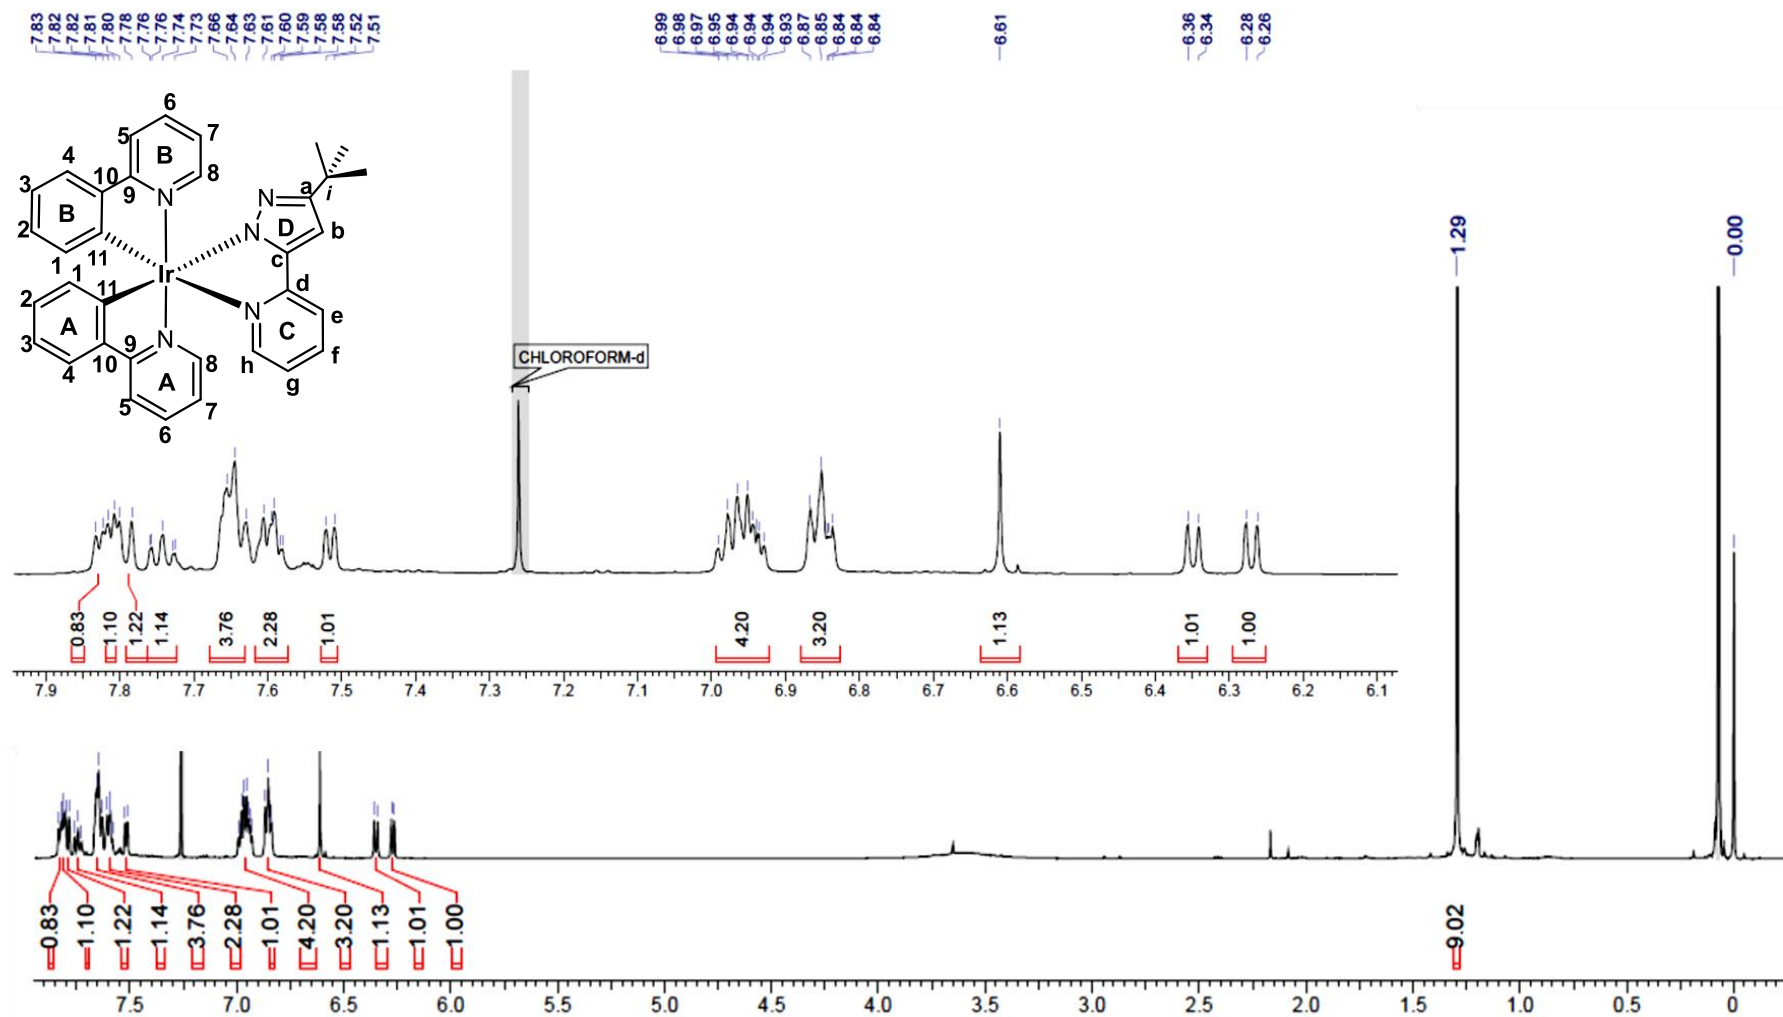



<sup>13</sup>C NMR APT spectrum of 3cL<sub>2</sub>

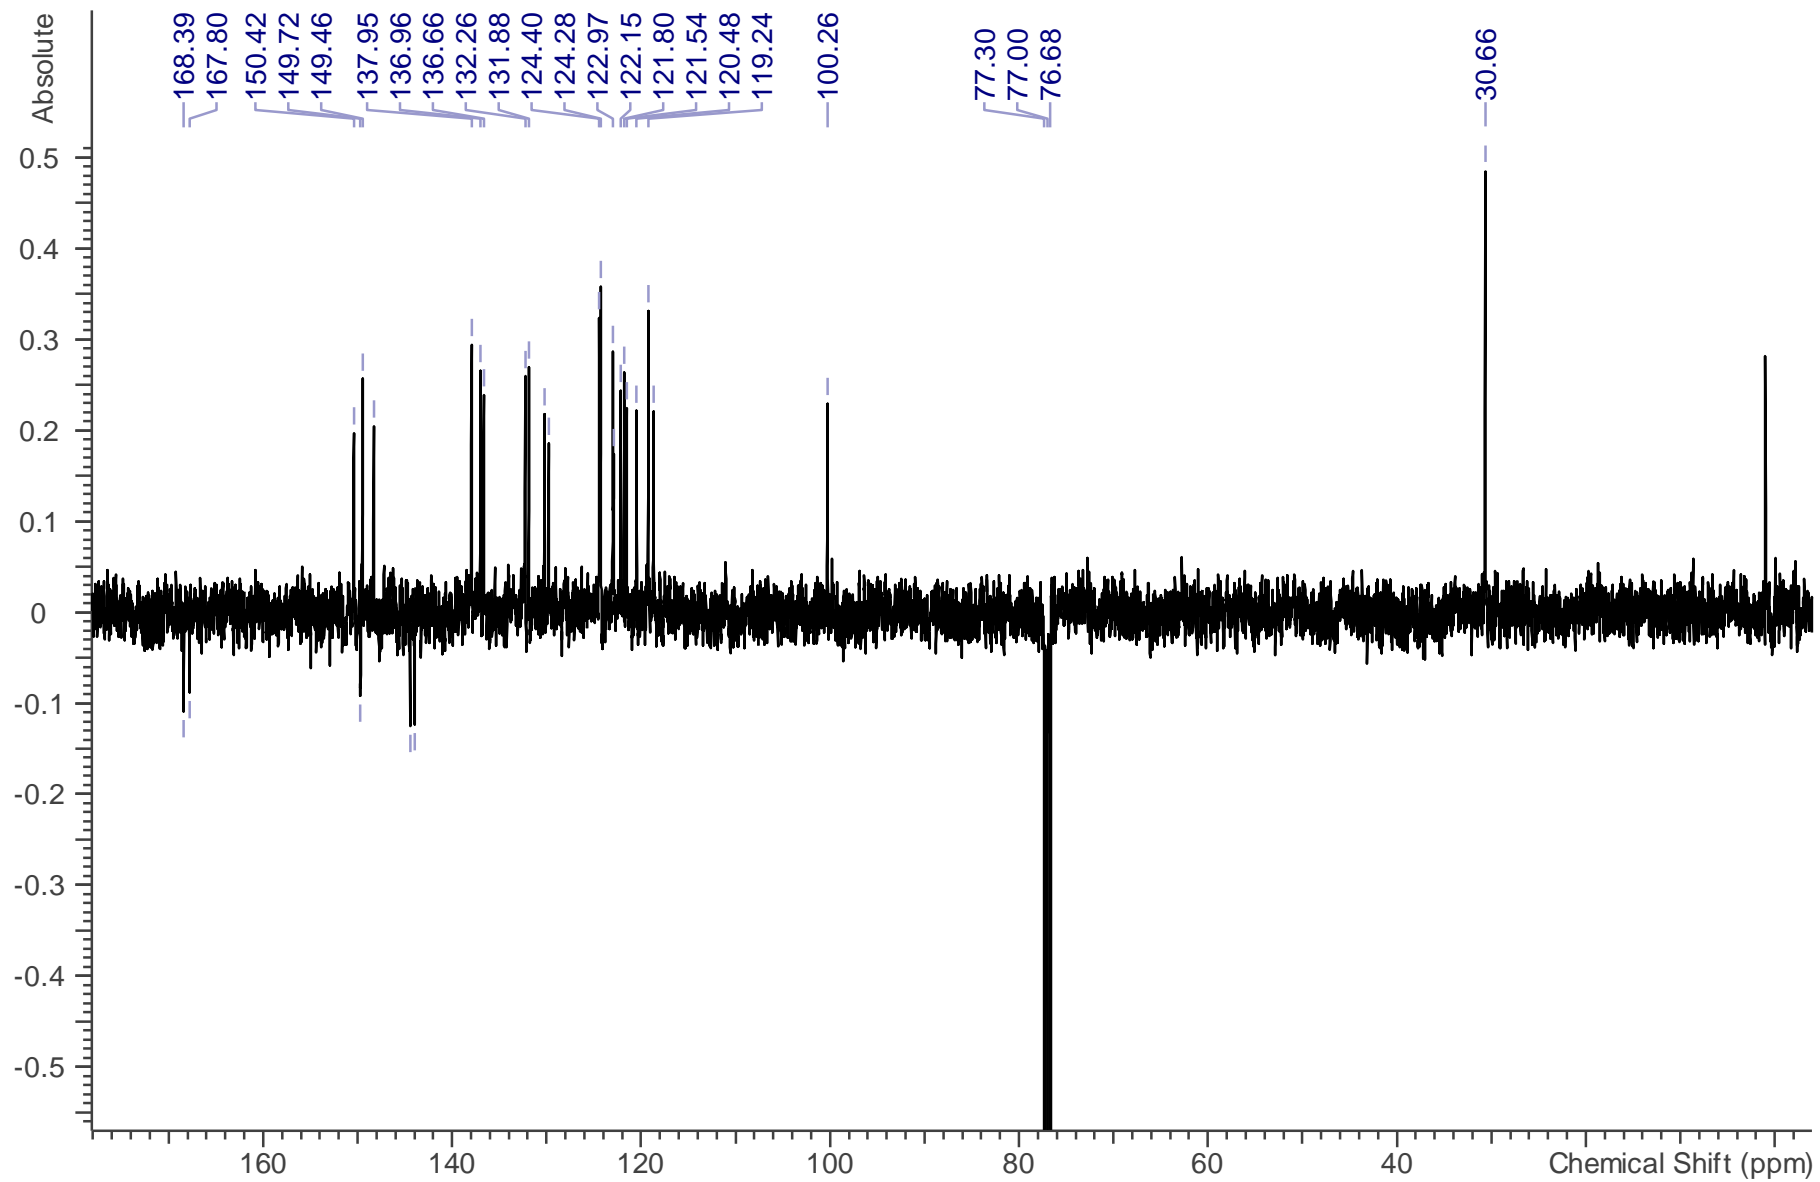

Section of  $^{13}\text{C}$  NMR APT spectrum of  $3\text{cL}_2$

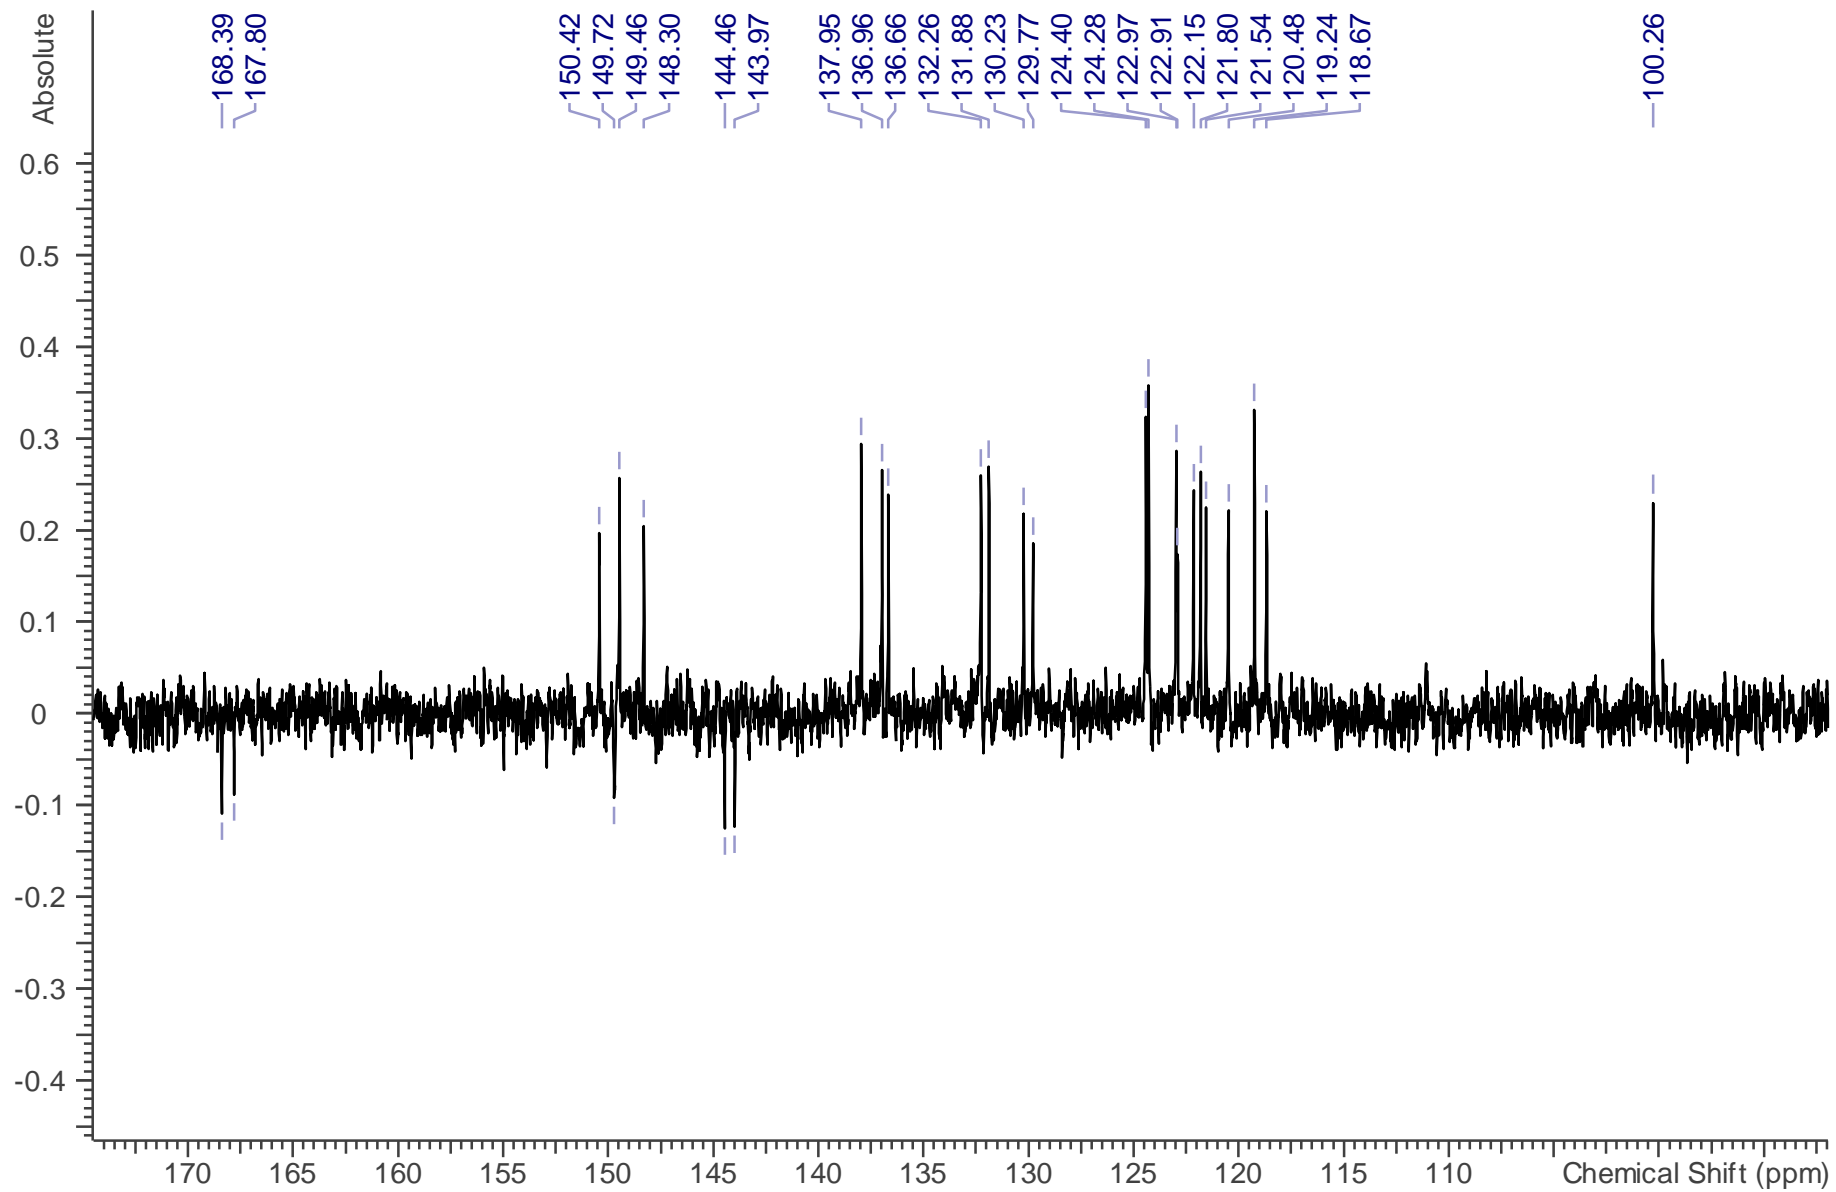

Section of the TOCSY spectrum of **3cL<sub>2</sub>**

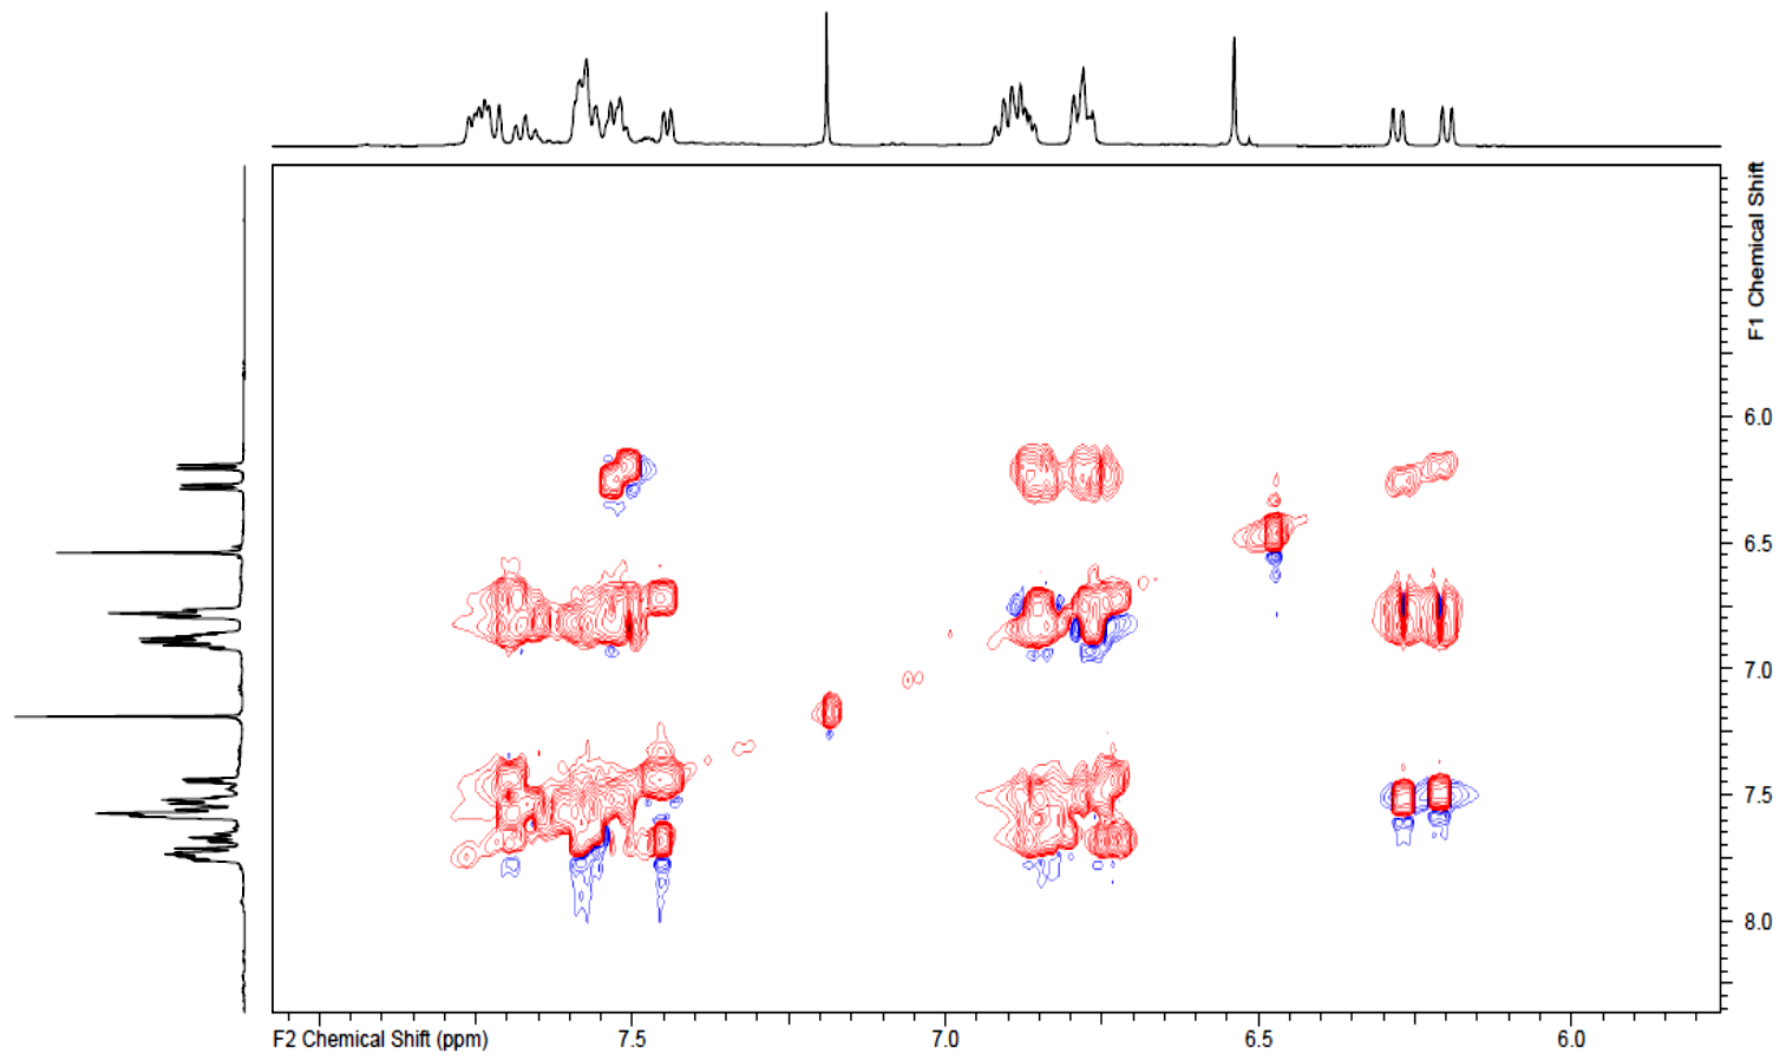

Section of the COSY spectrum of **3cL2**

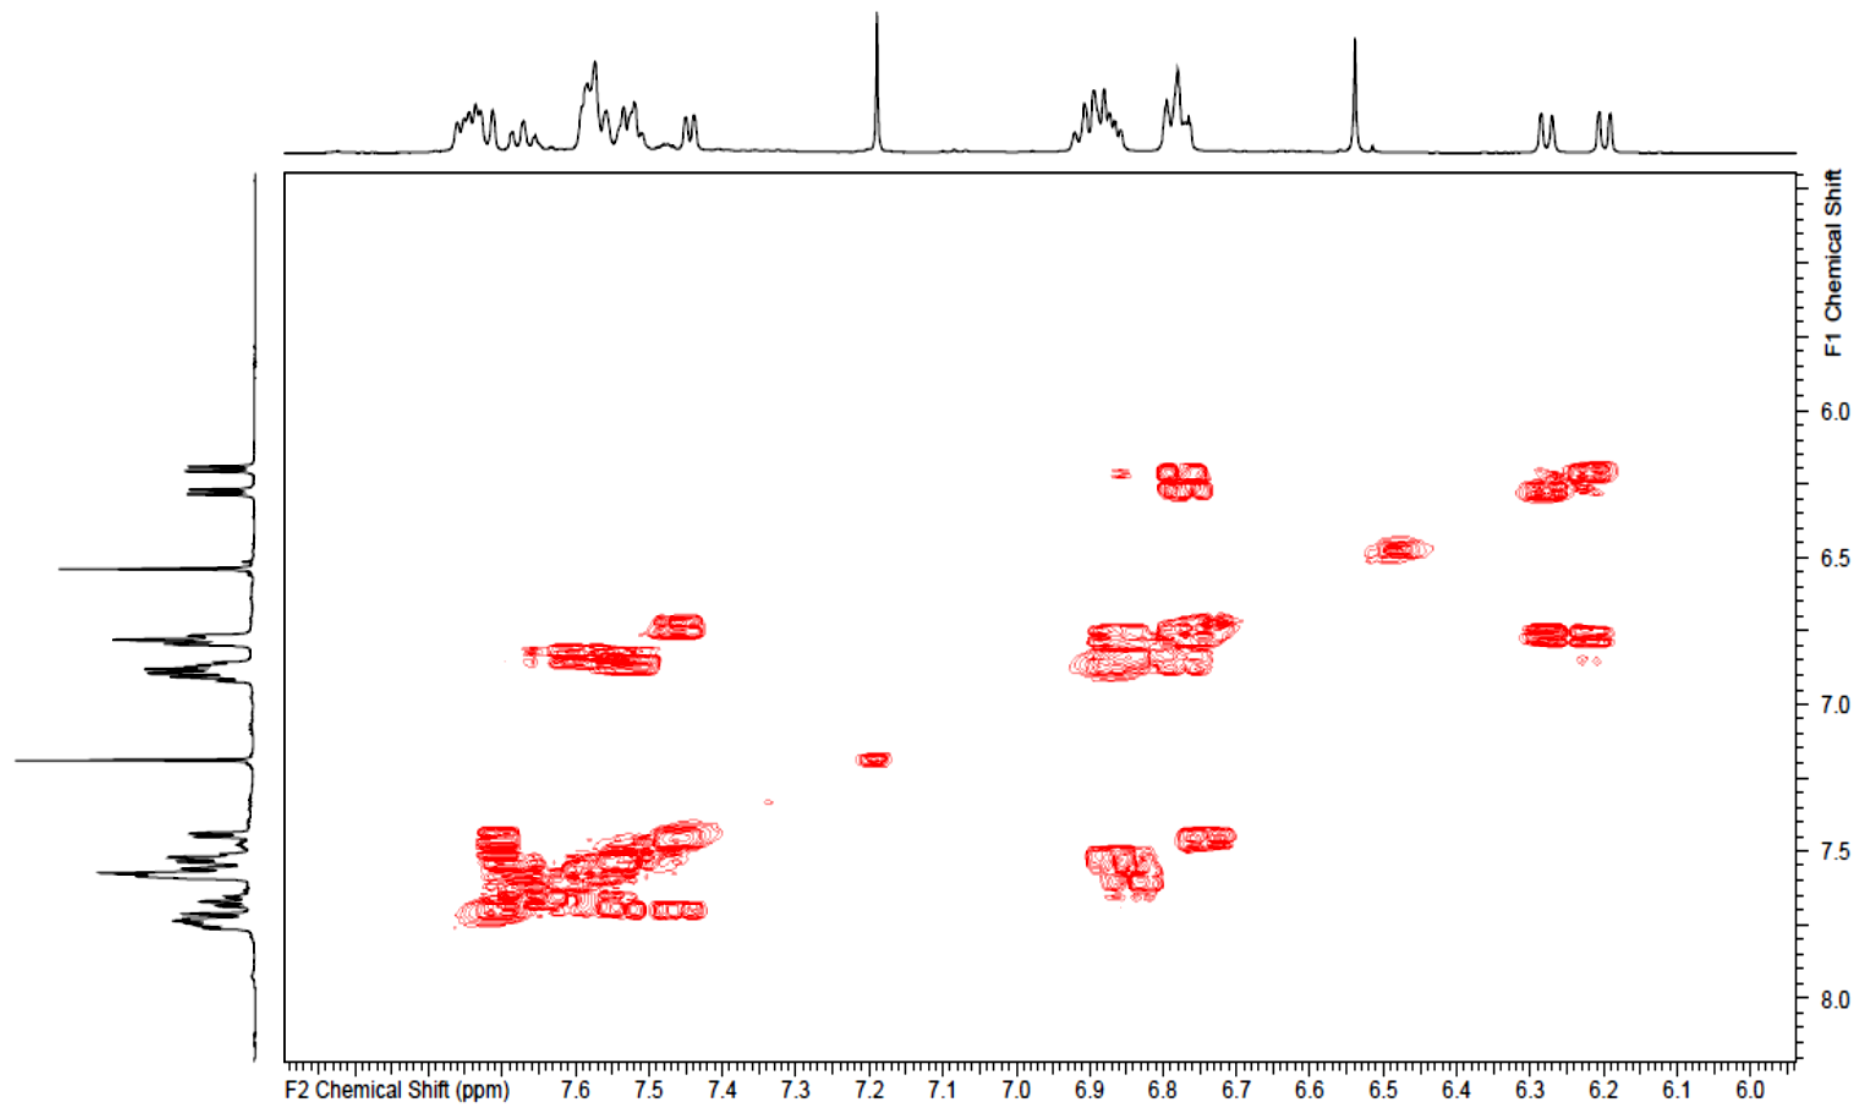

Section of the NOESY spectrum of **3cL<sub>2</sub>**

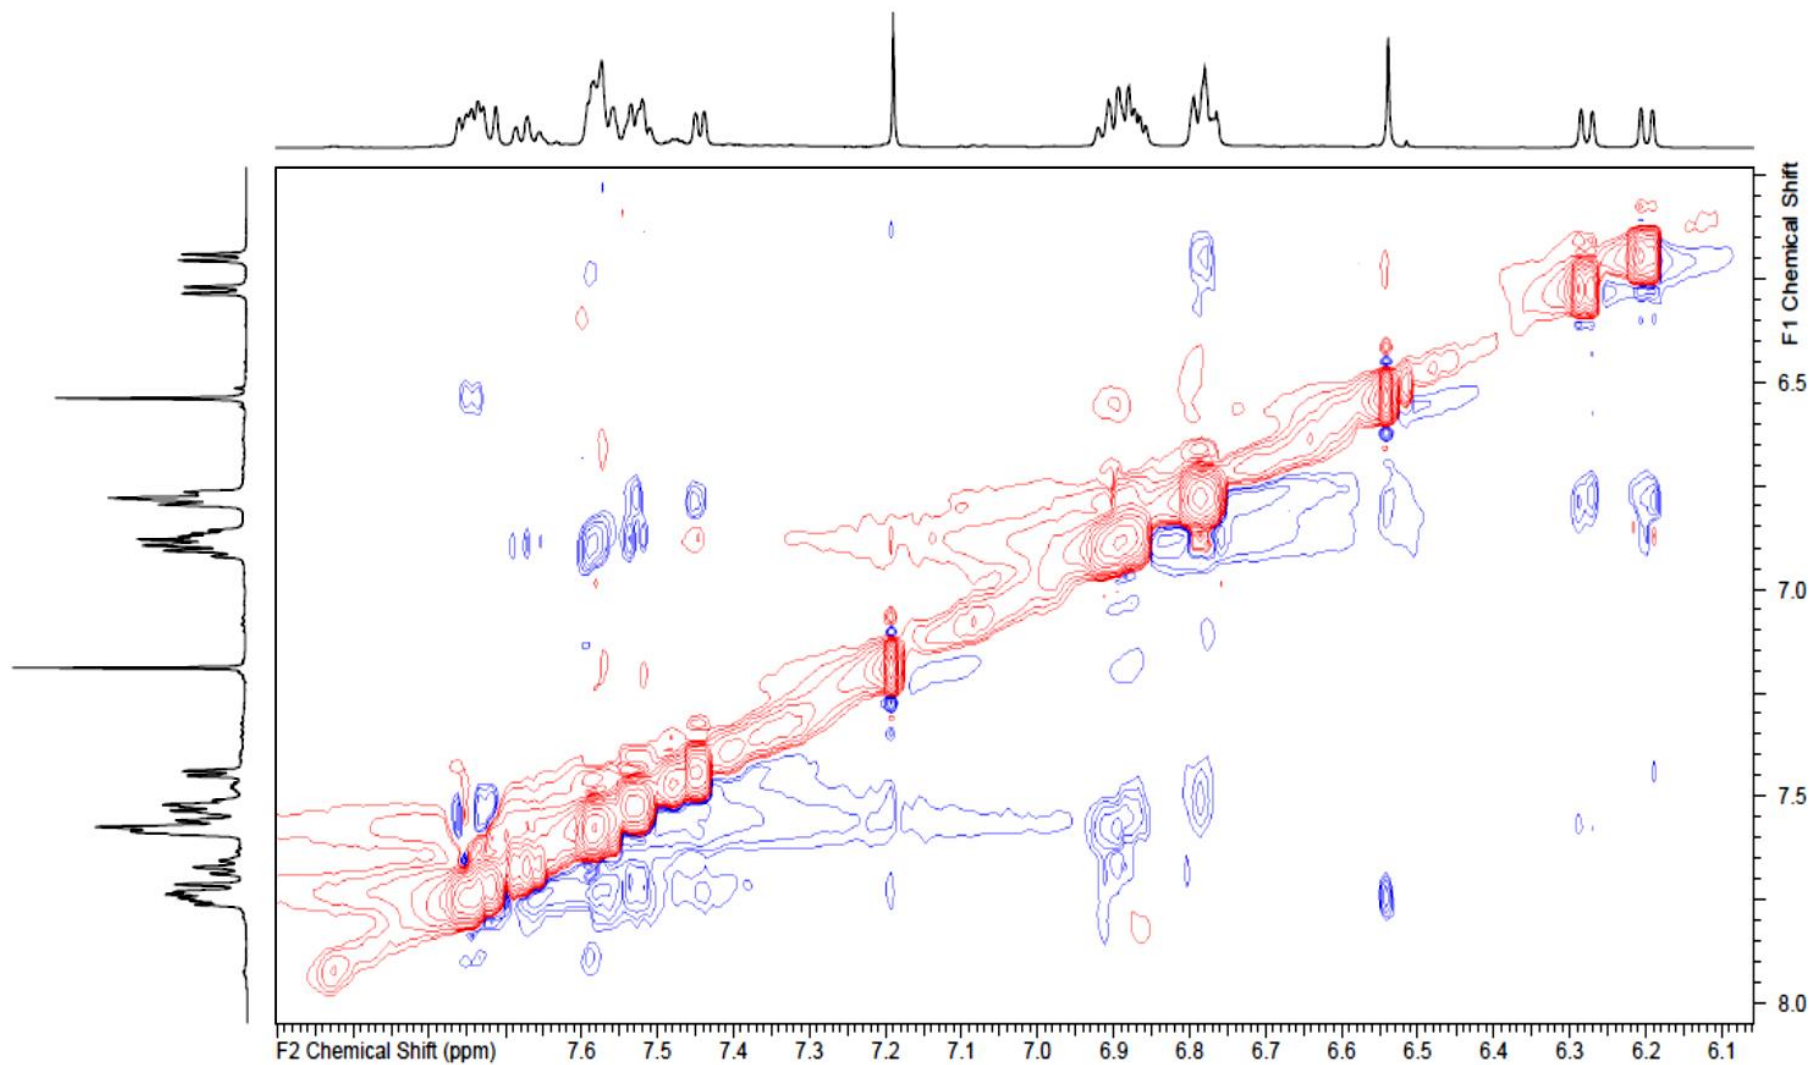

Section of the HSQC spectrum of **3cL<sub>2</sub>**

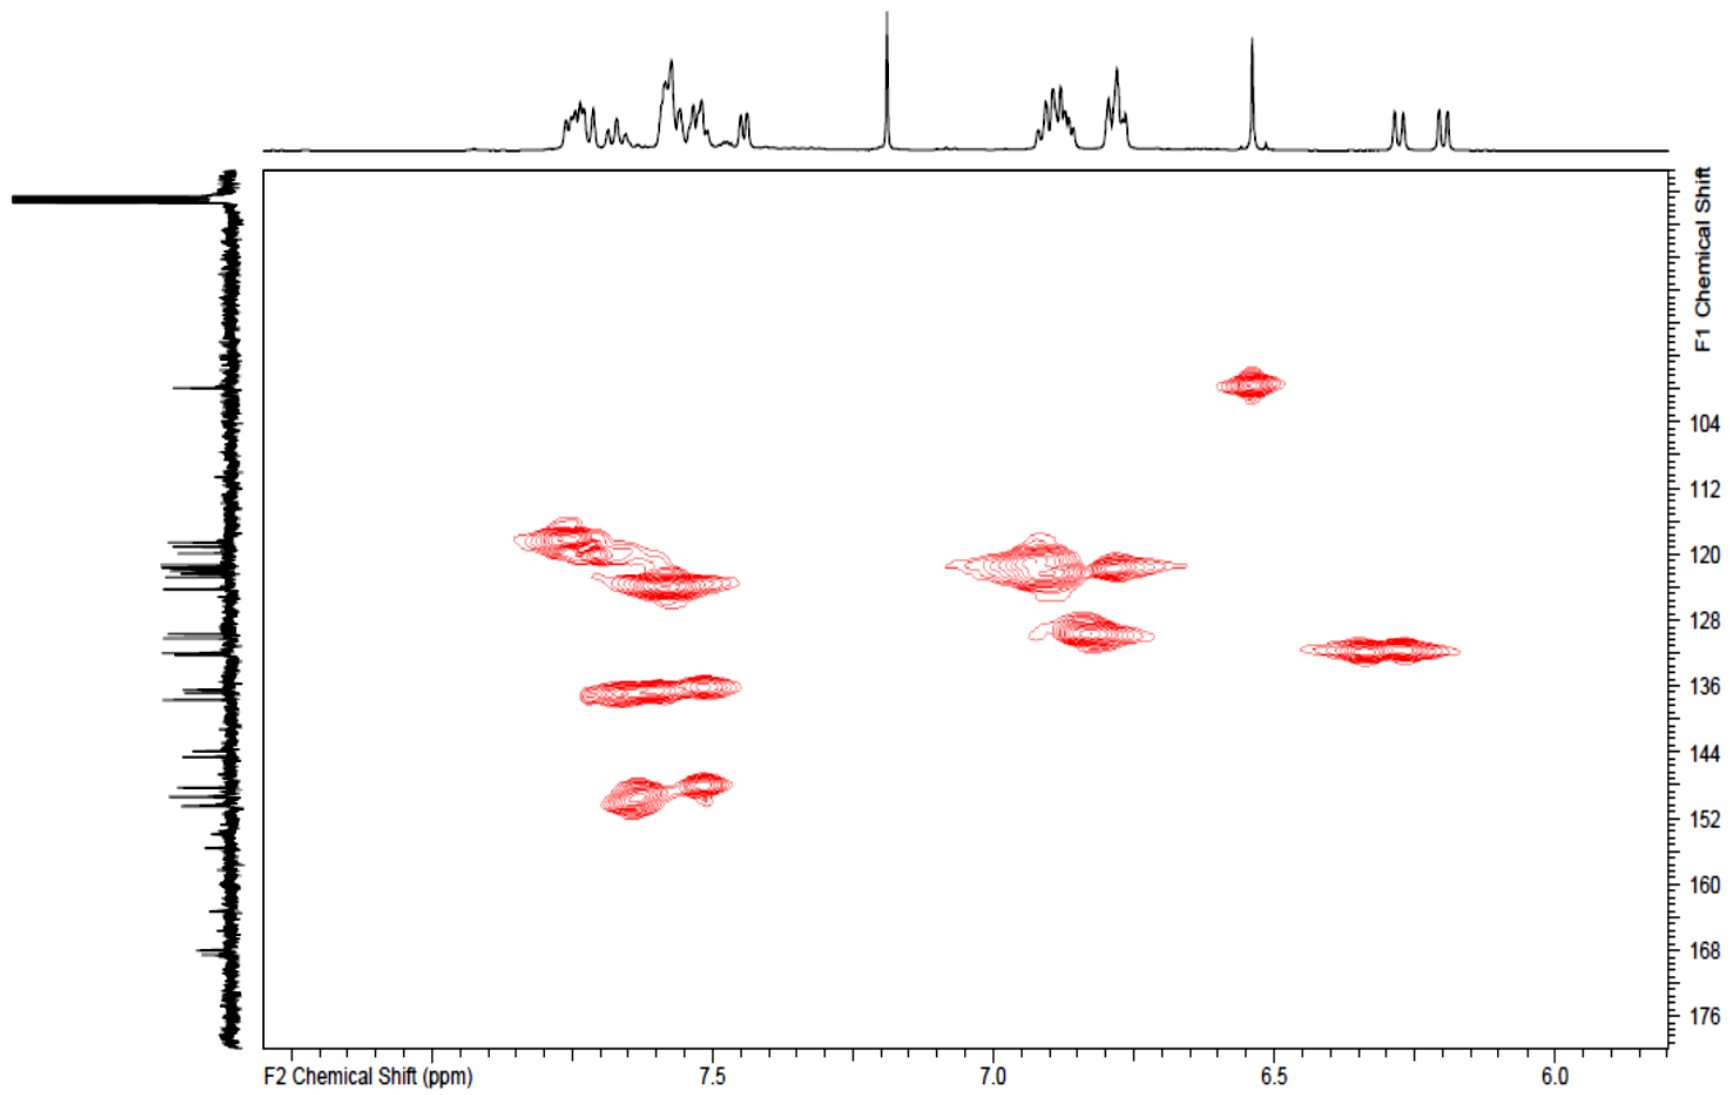

Section of the **HMBC** spectrum of **3cL<sub>2</sub>**

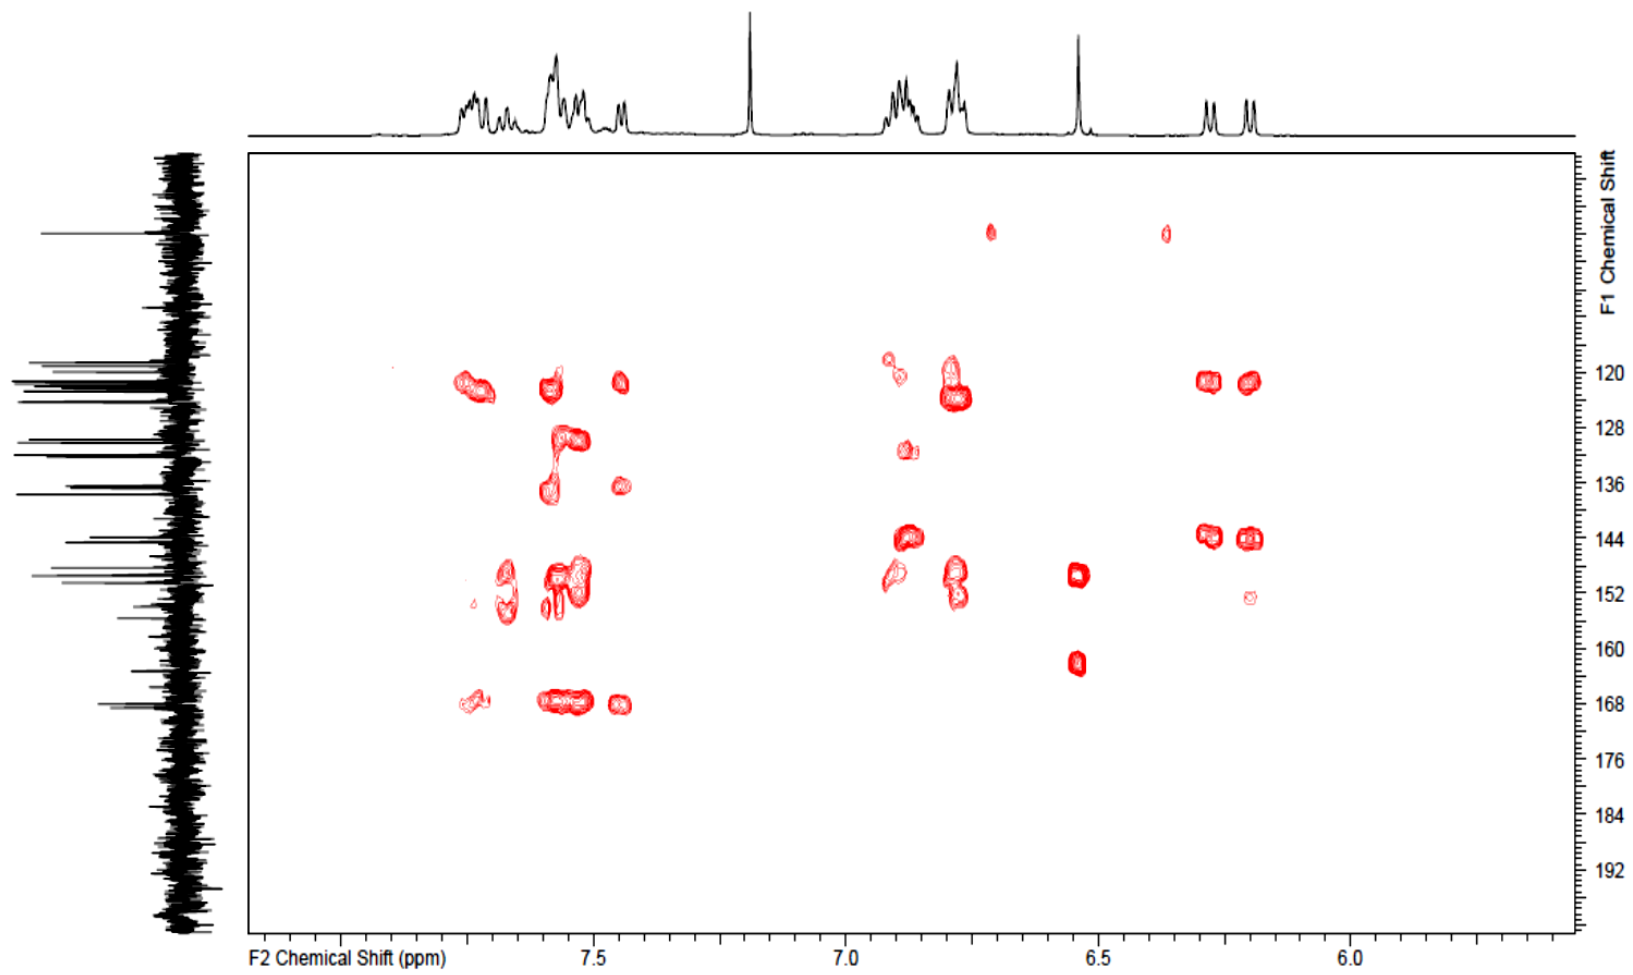

$^1\text{H}$  NMR spectrum of **3cL3**

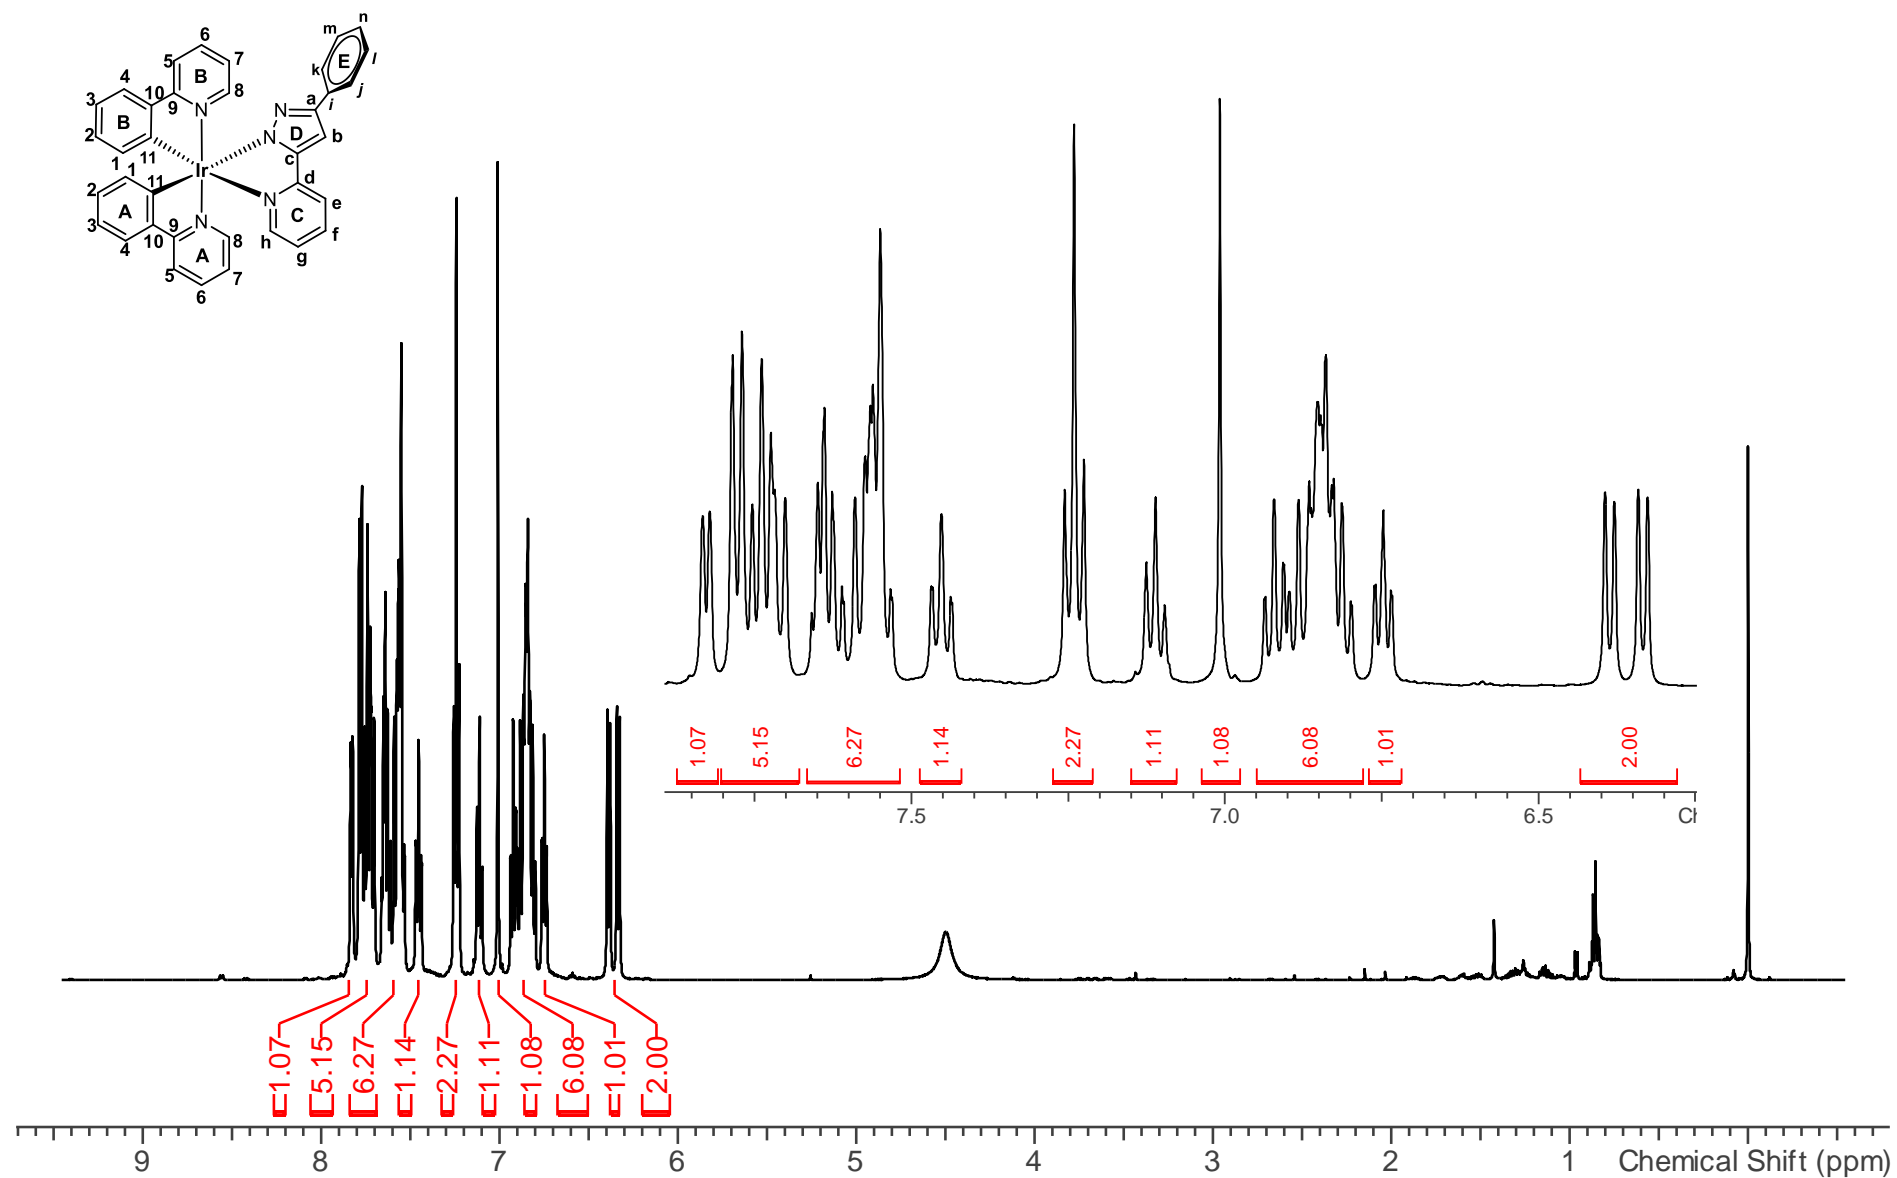



<sup>13</sup>C NMR APT spectrum of 3cL<sub>3</sub>

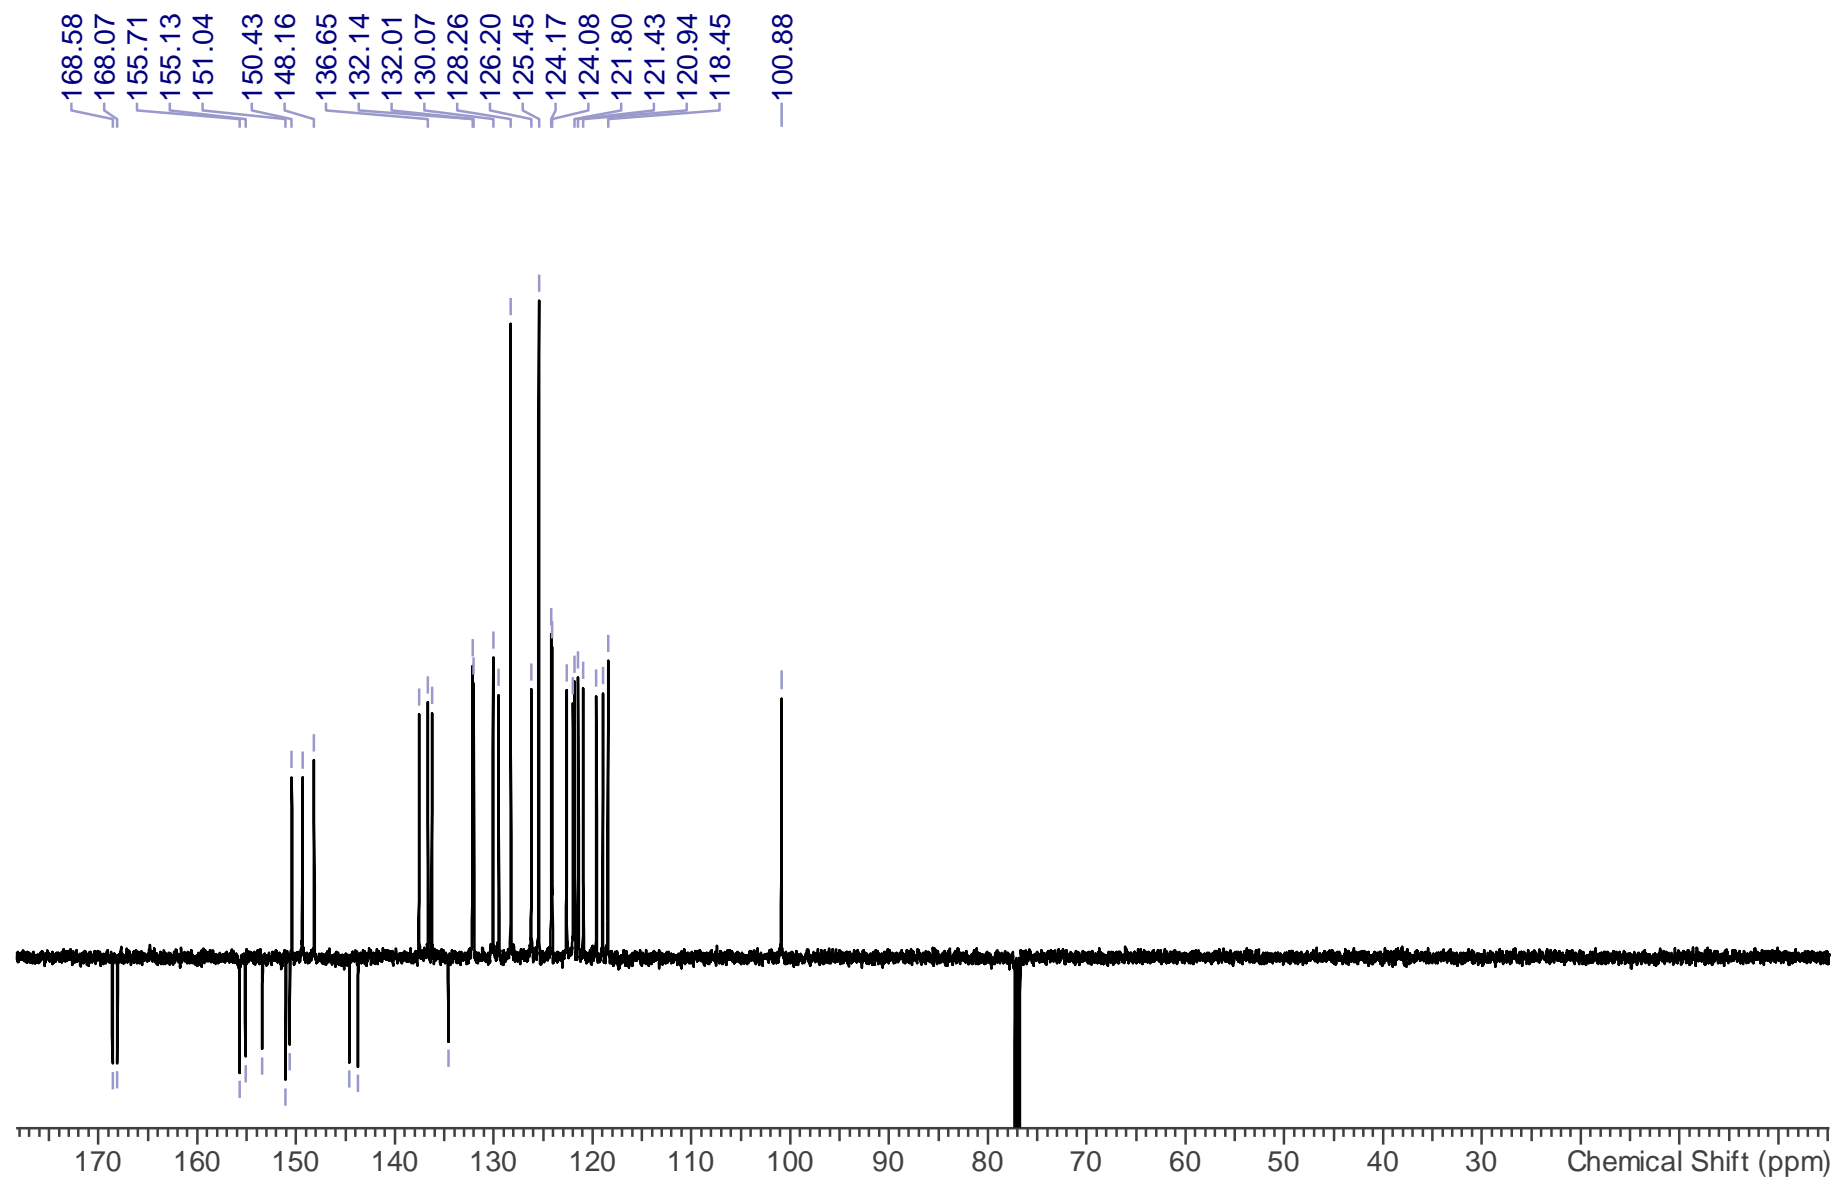

Section of  $^{13}\text{C}$  NMR APT spectrum of **3cL<sub>3</sub>**

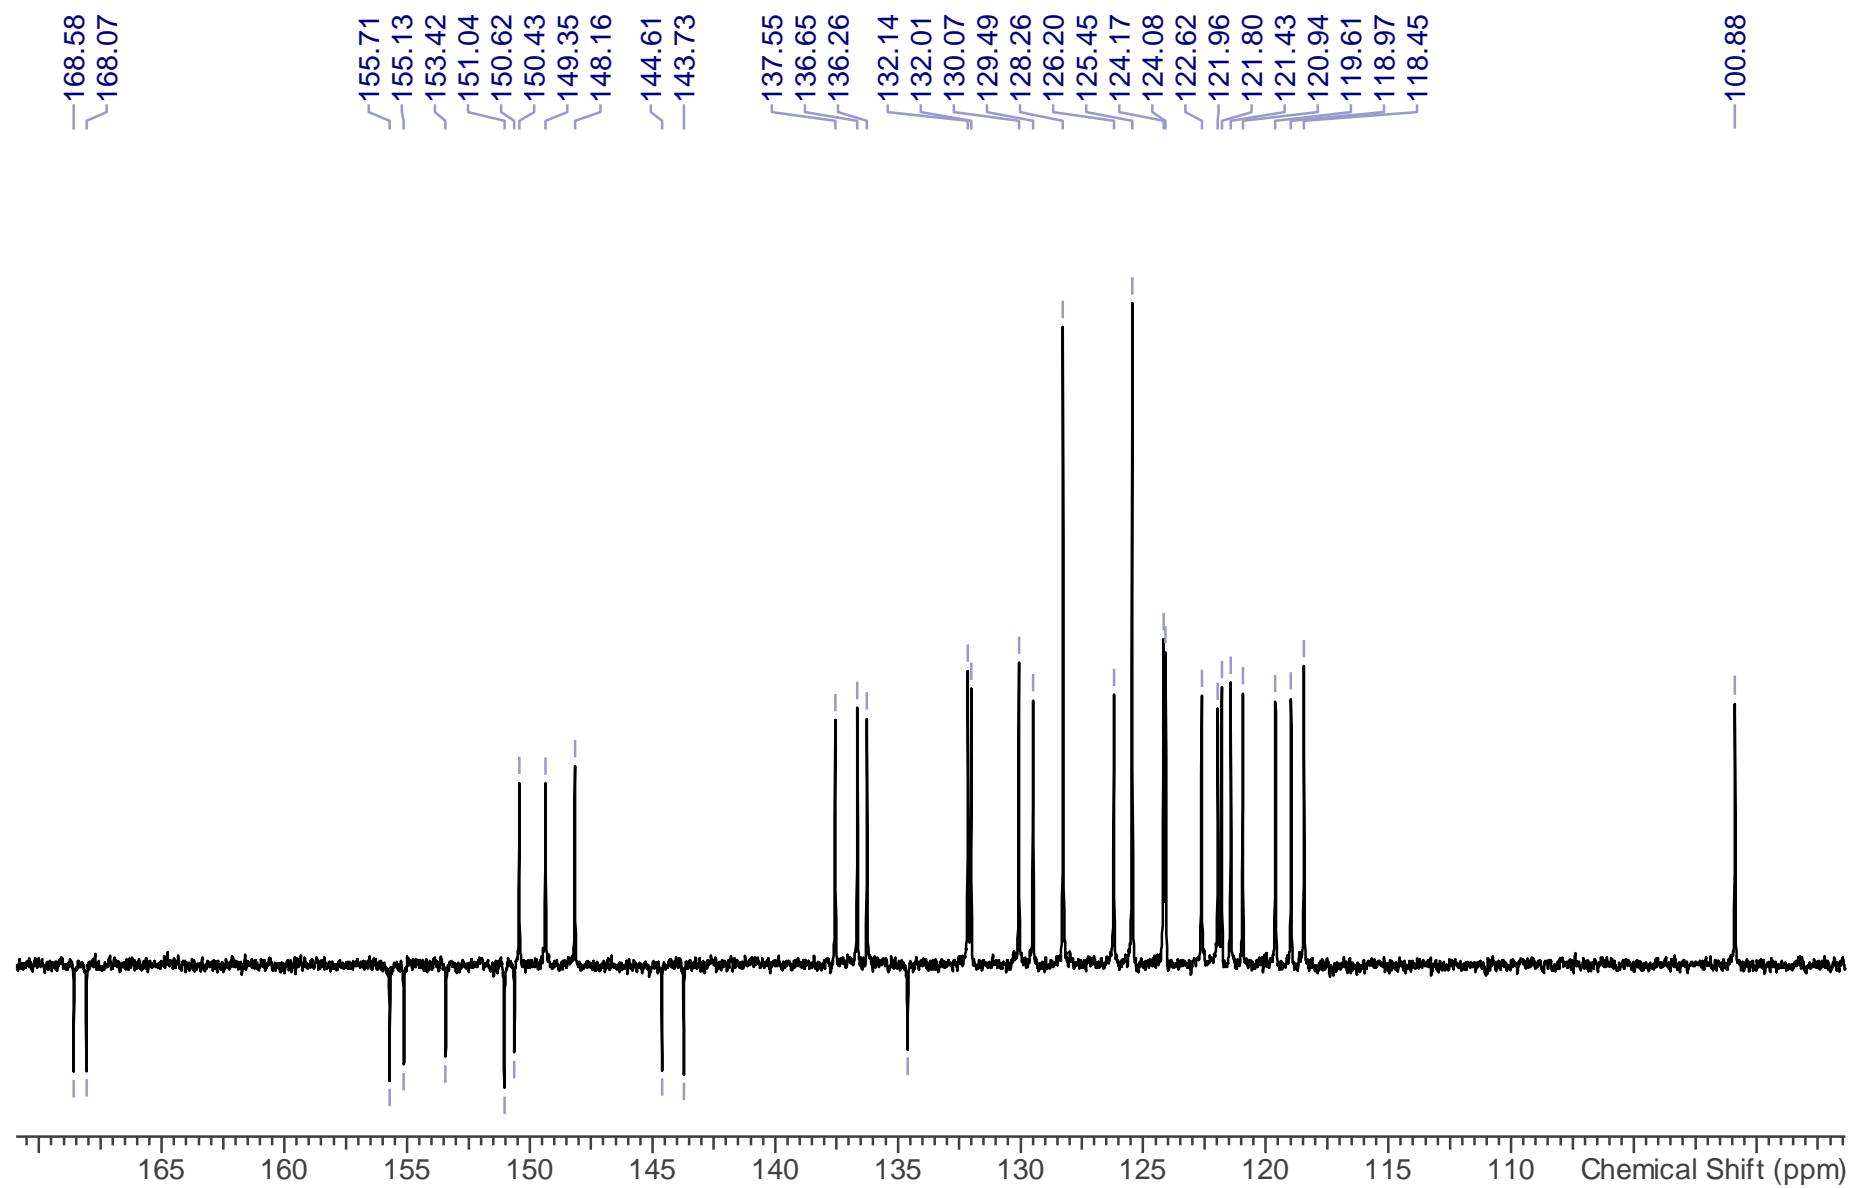

Section of the TOCSY spectrum of **3cL3**

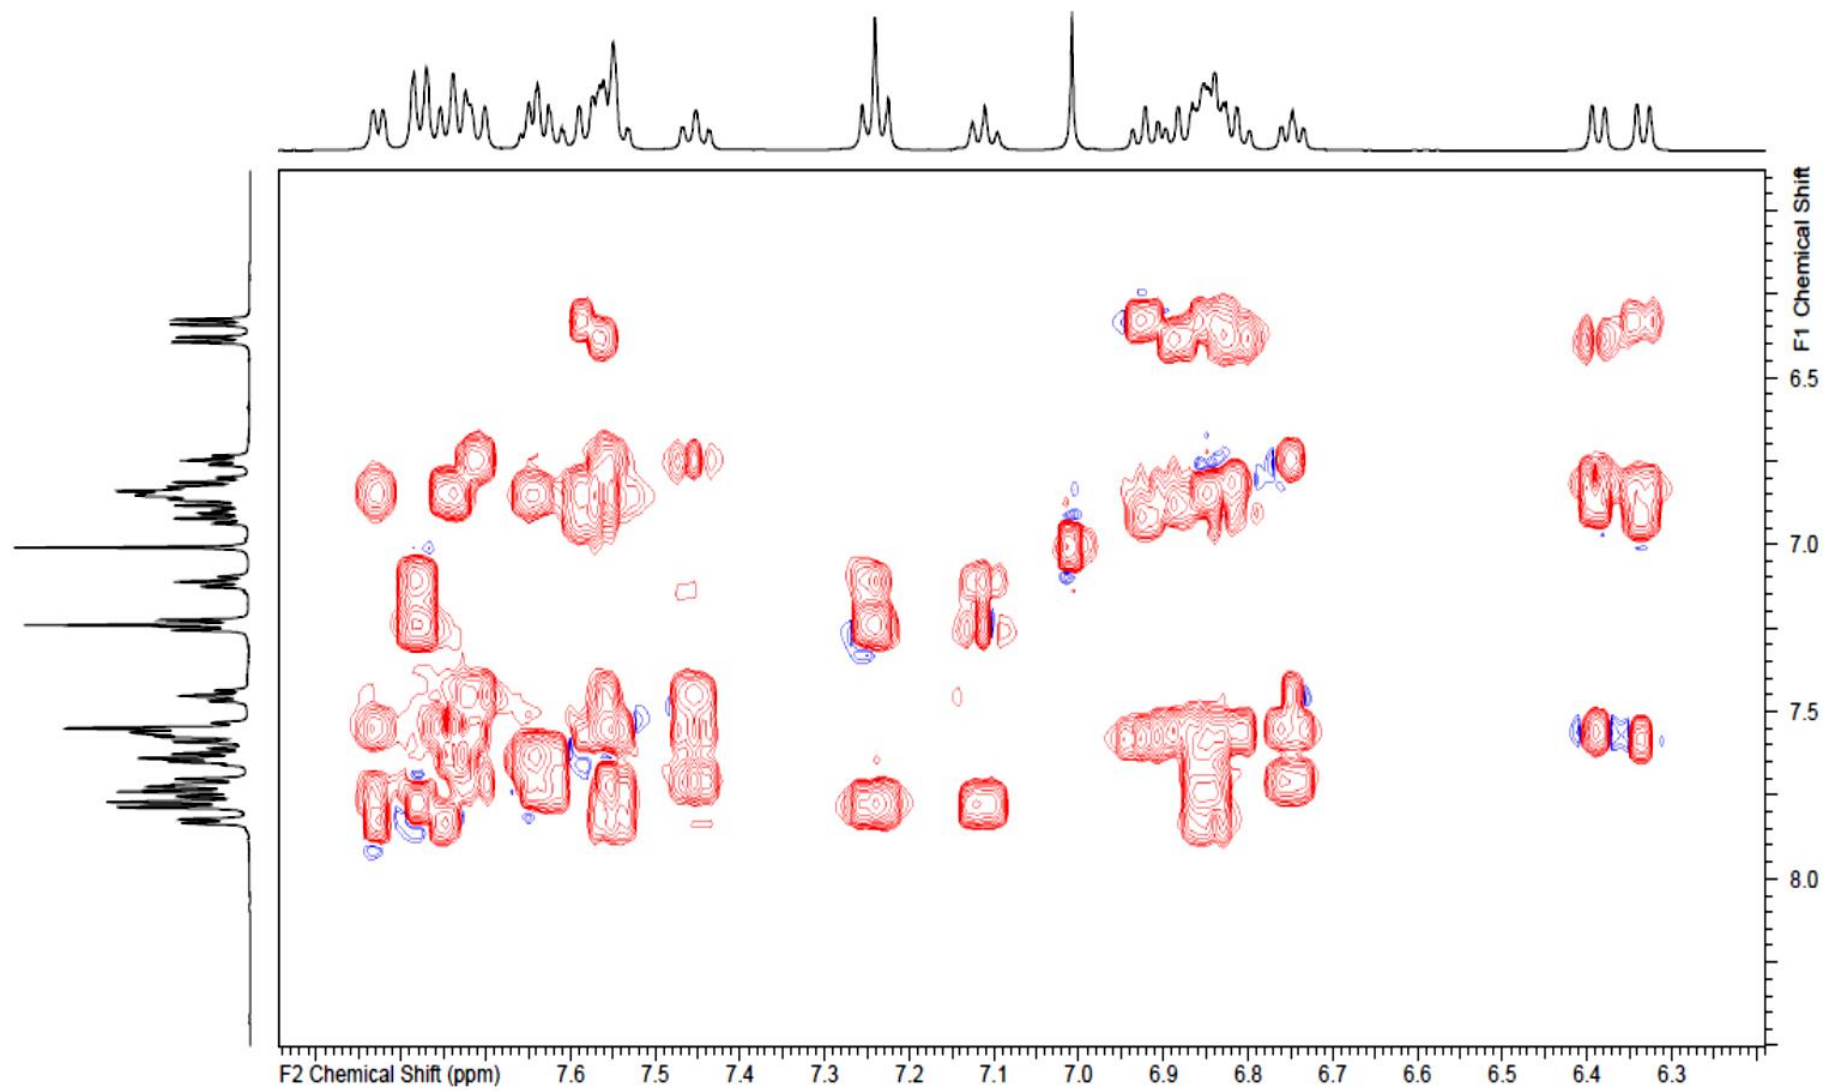

Section of the COSY spectrum of **3cL3**

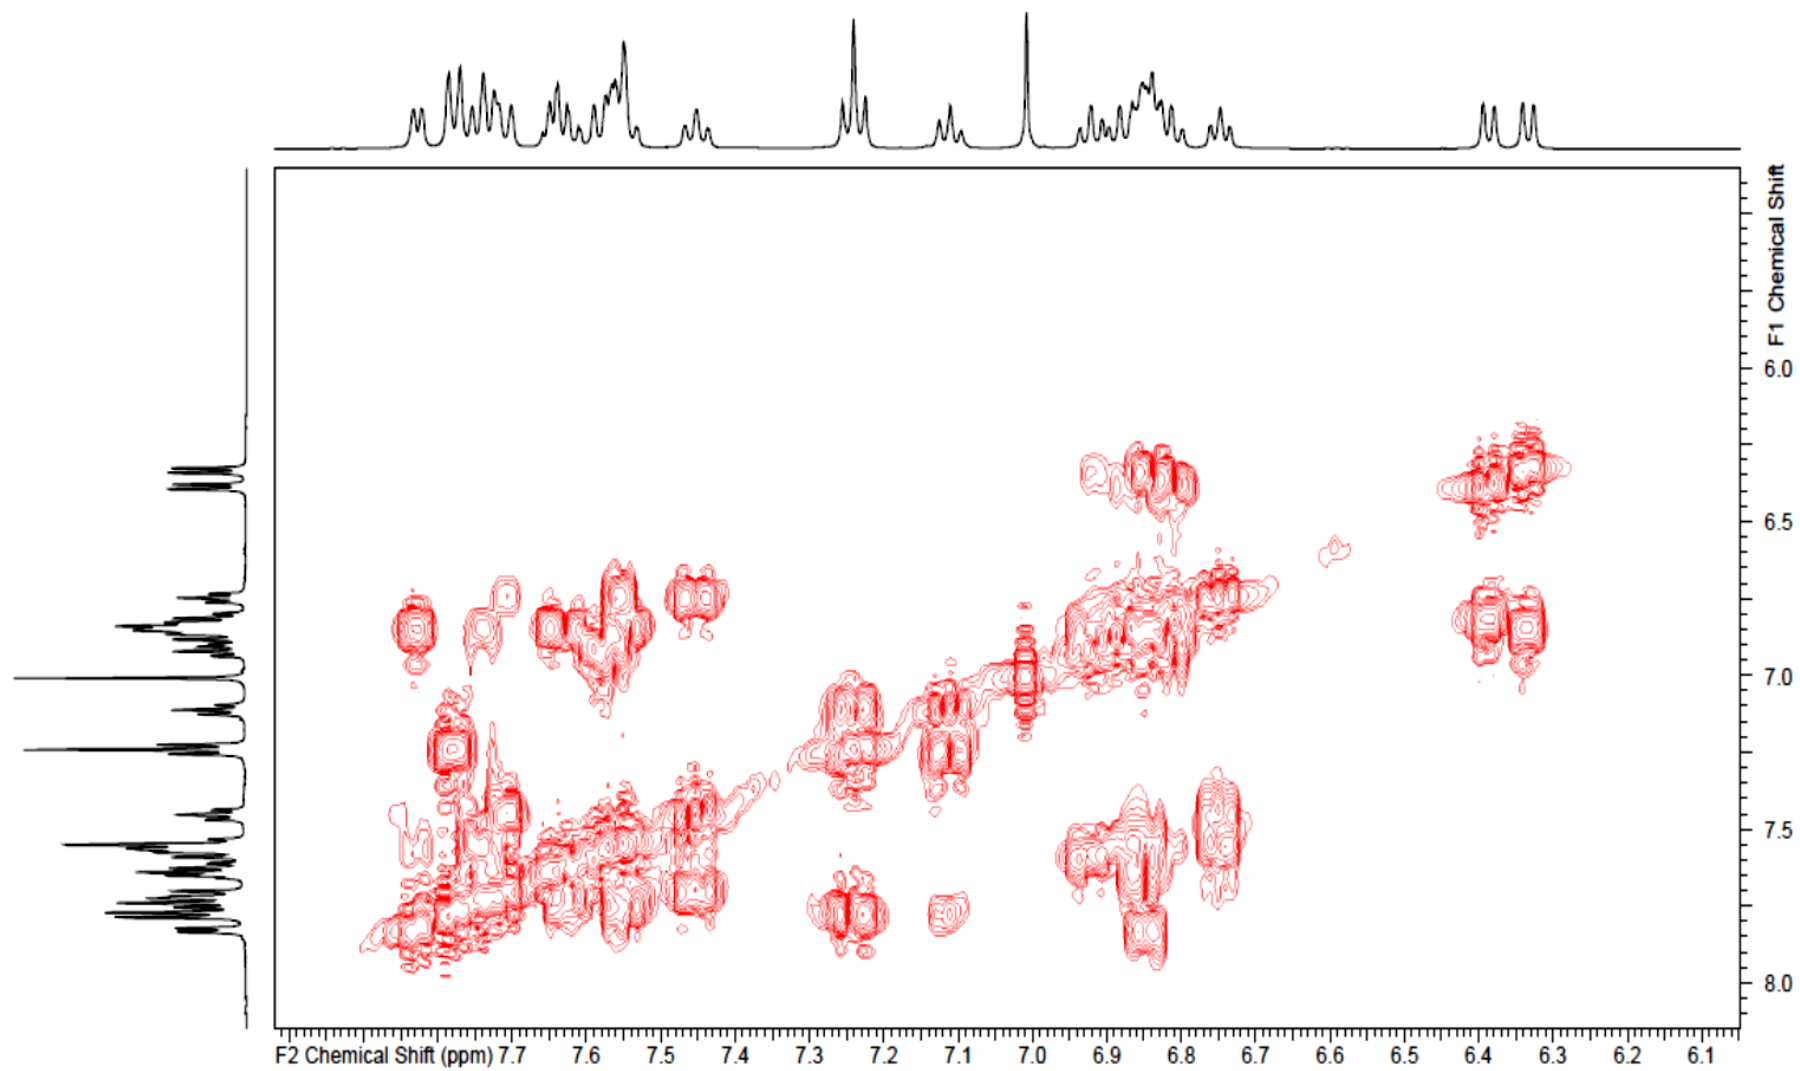

Section of the NOESY spectrum of **3cL3**

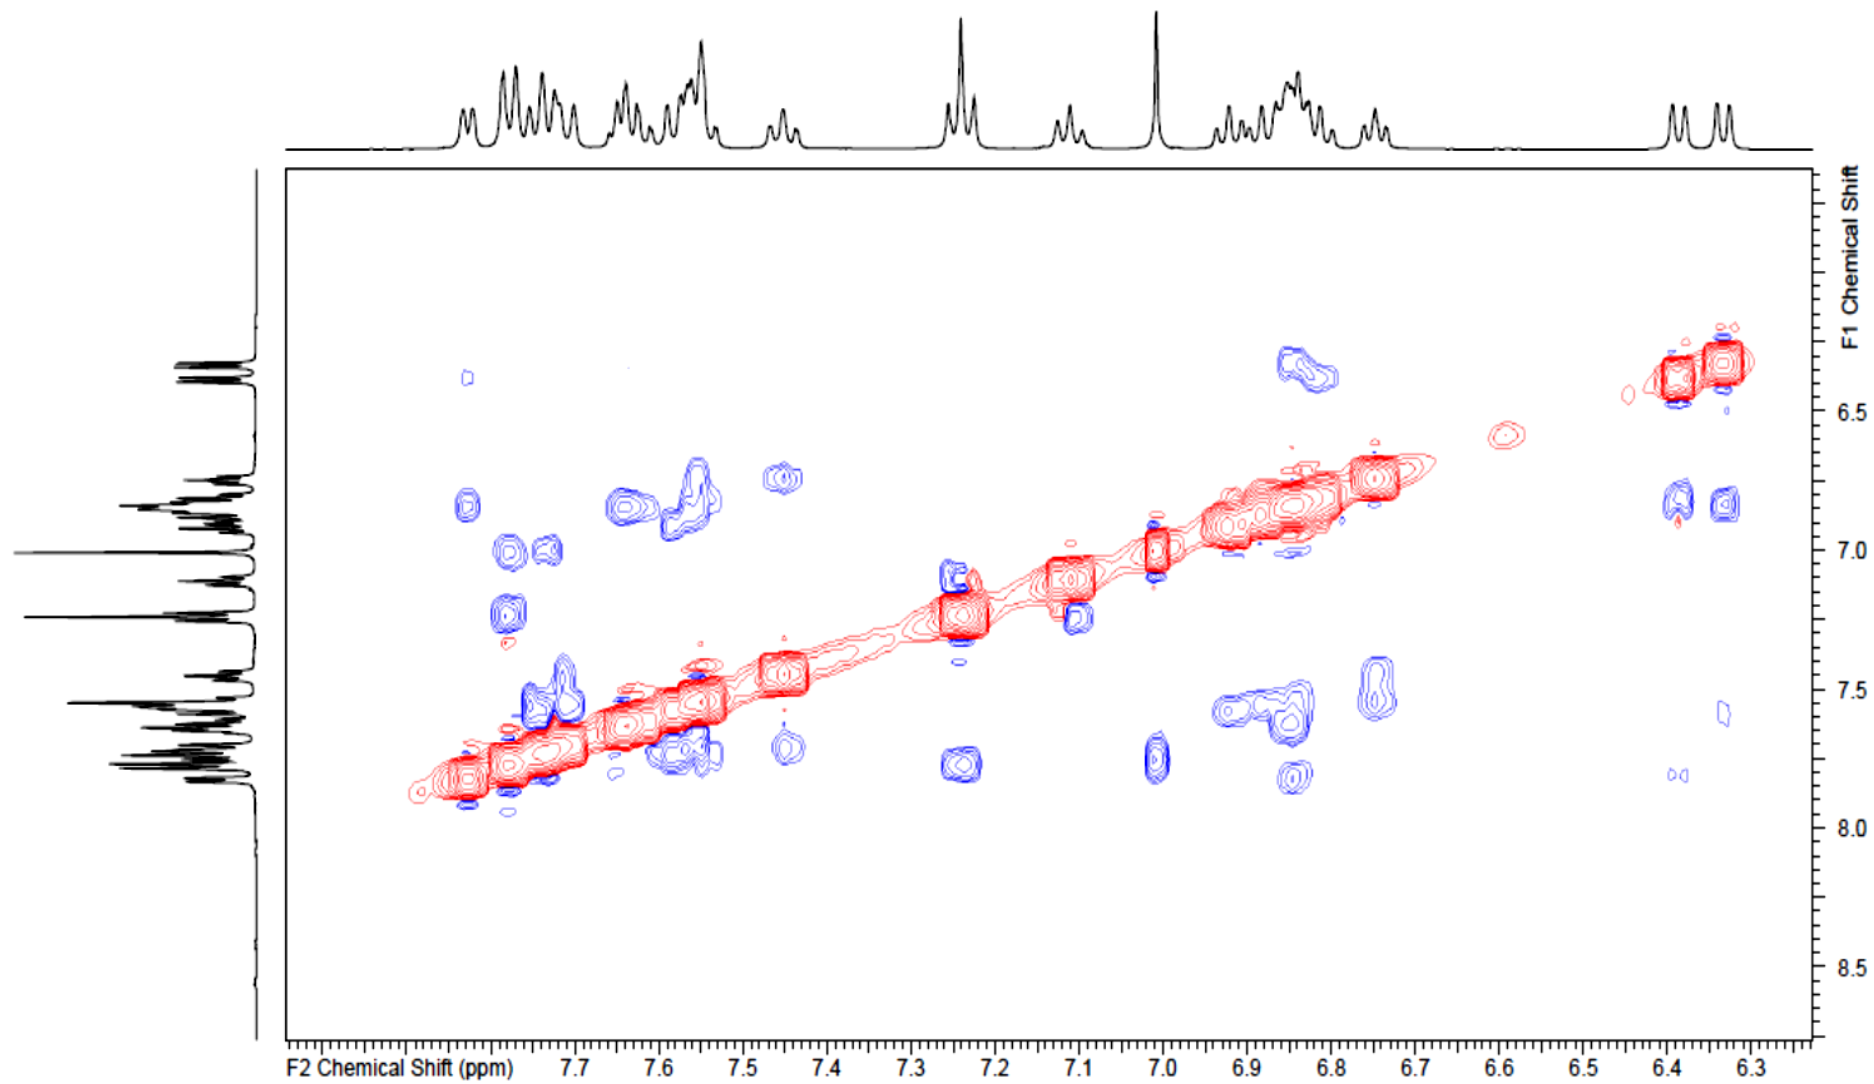

$^1\text{H}$  NMR spectrum of **3dL2**

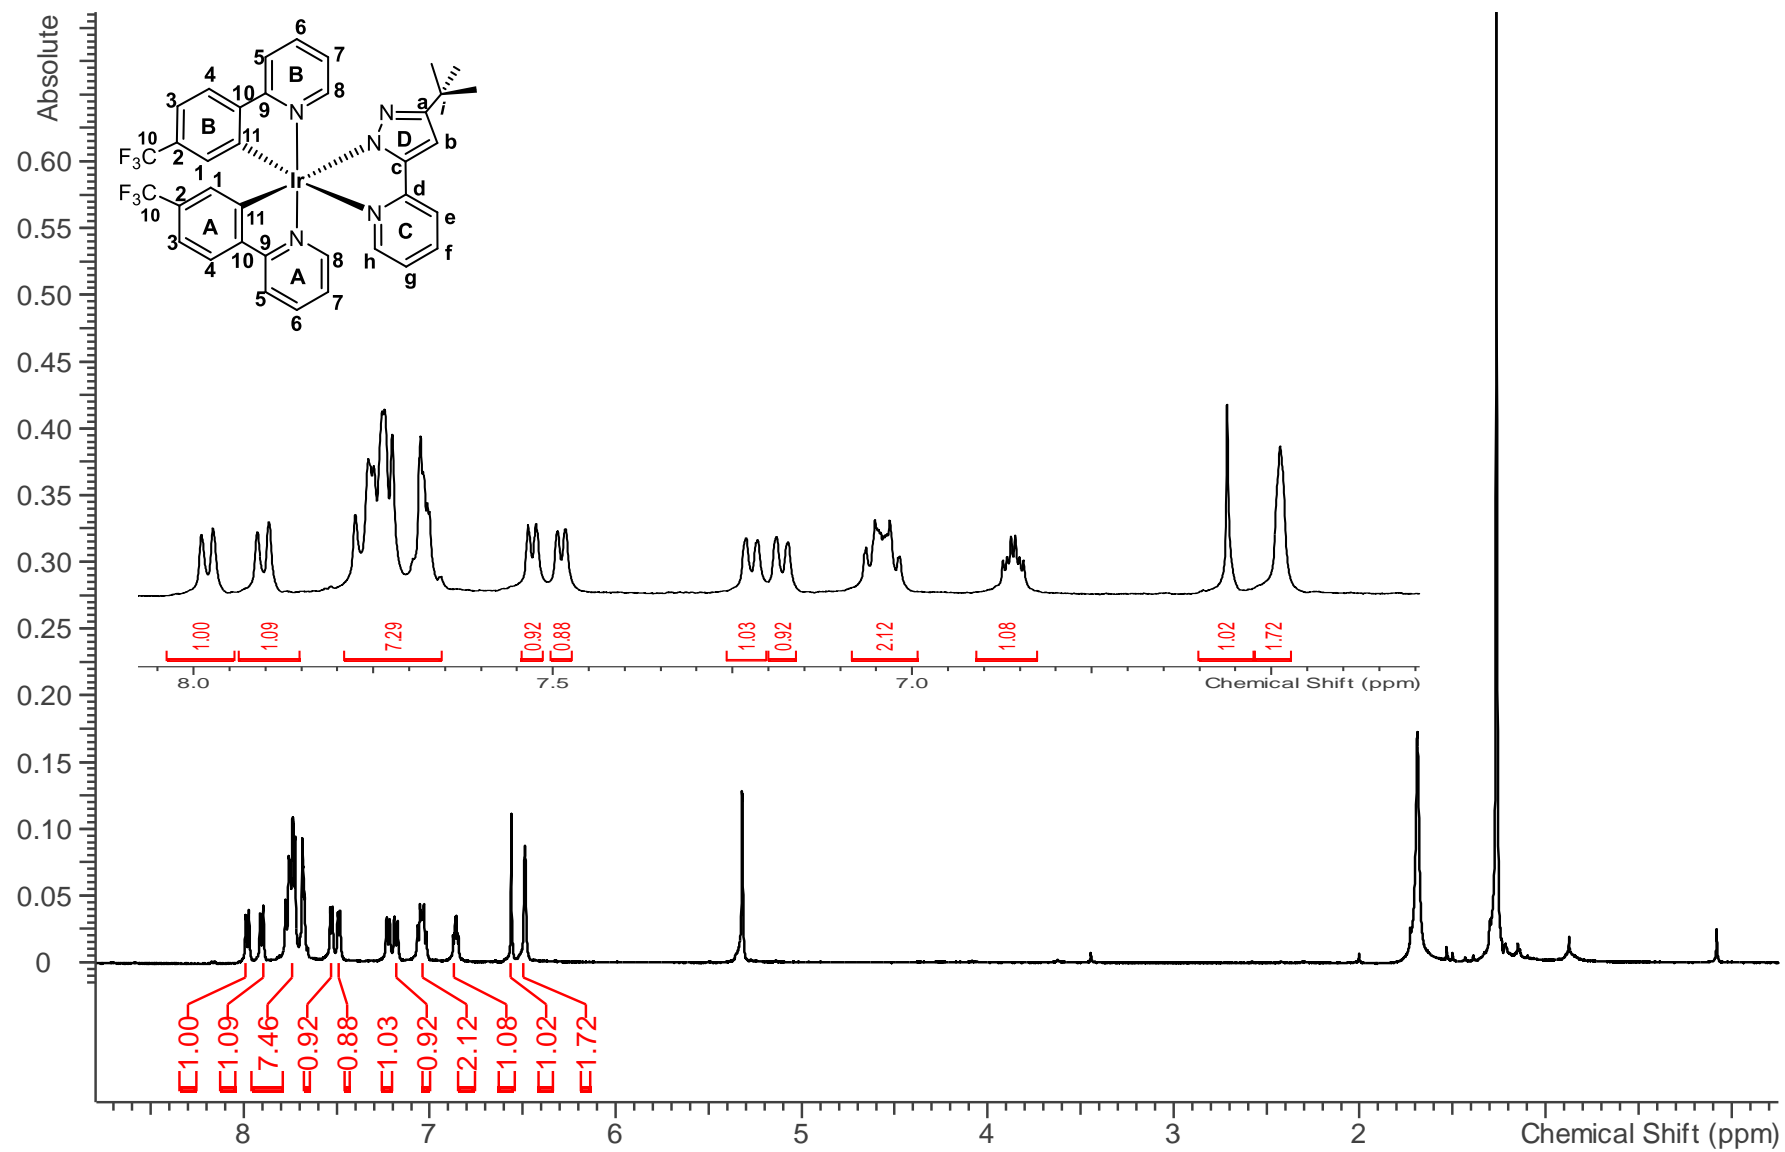

$^{13}\text{C}$  NMR APT spectrum of **3dL<sub>2</sub>**

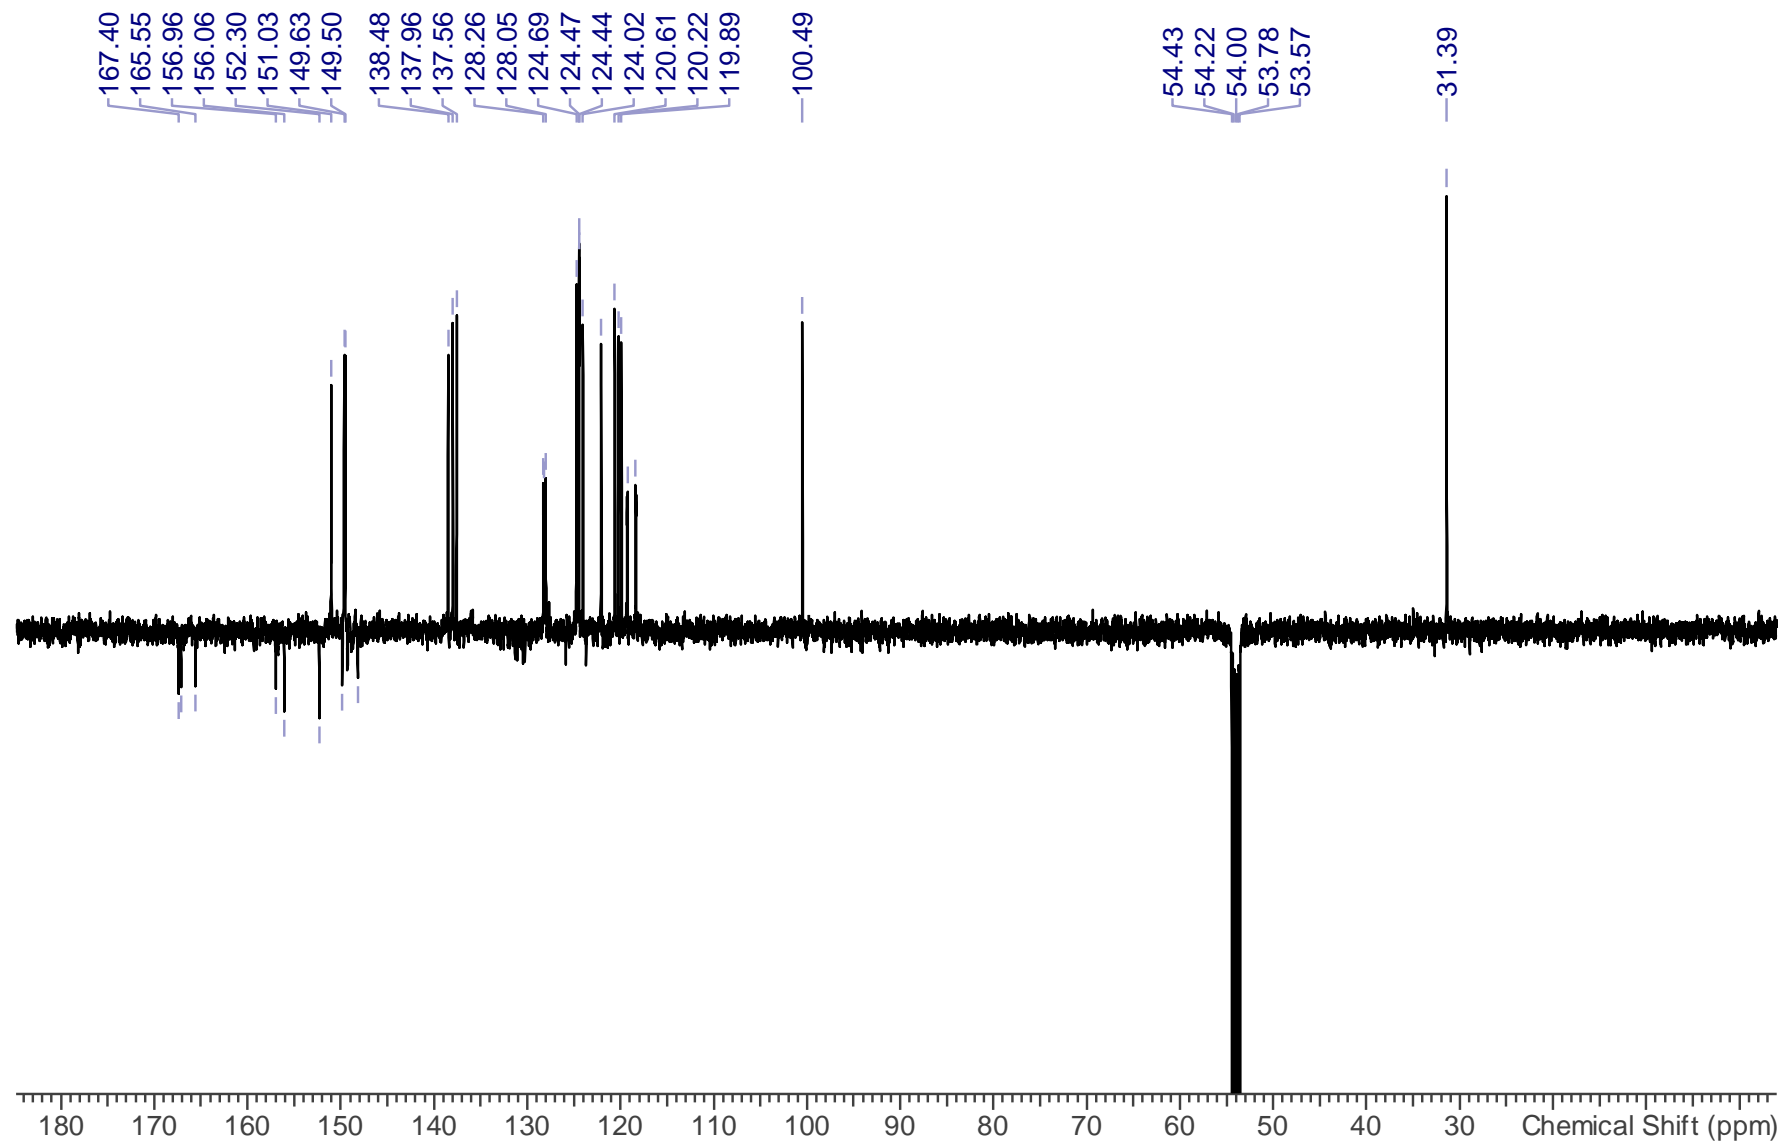

Section of  $^{13}\text{C}$  NMR APT spectrum of **3dL<sub>2</sub>**

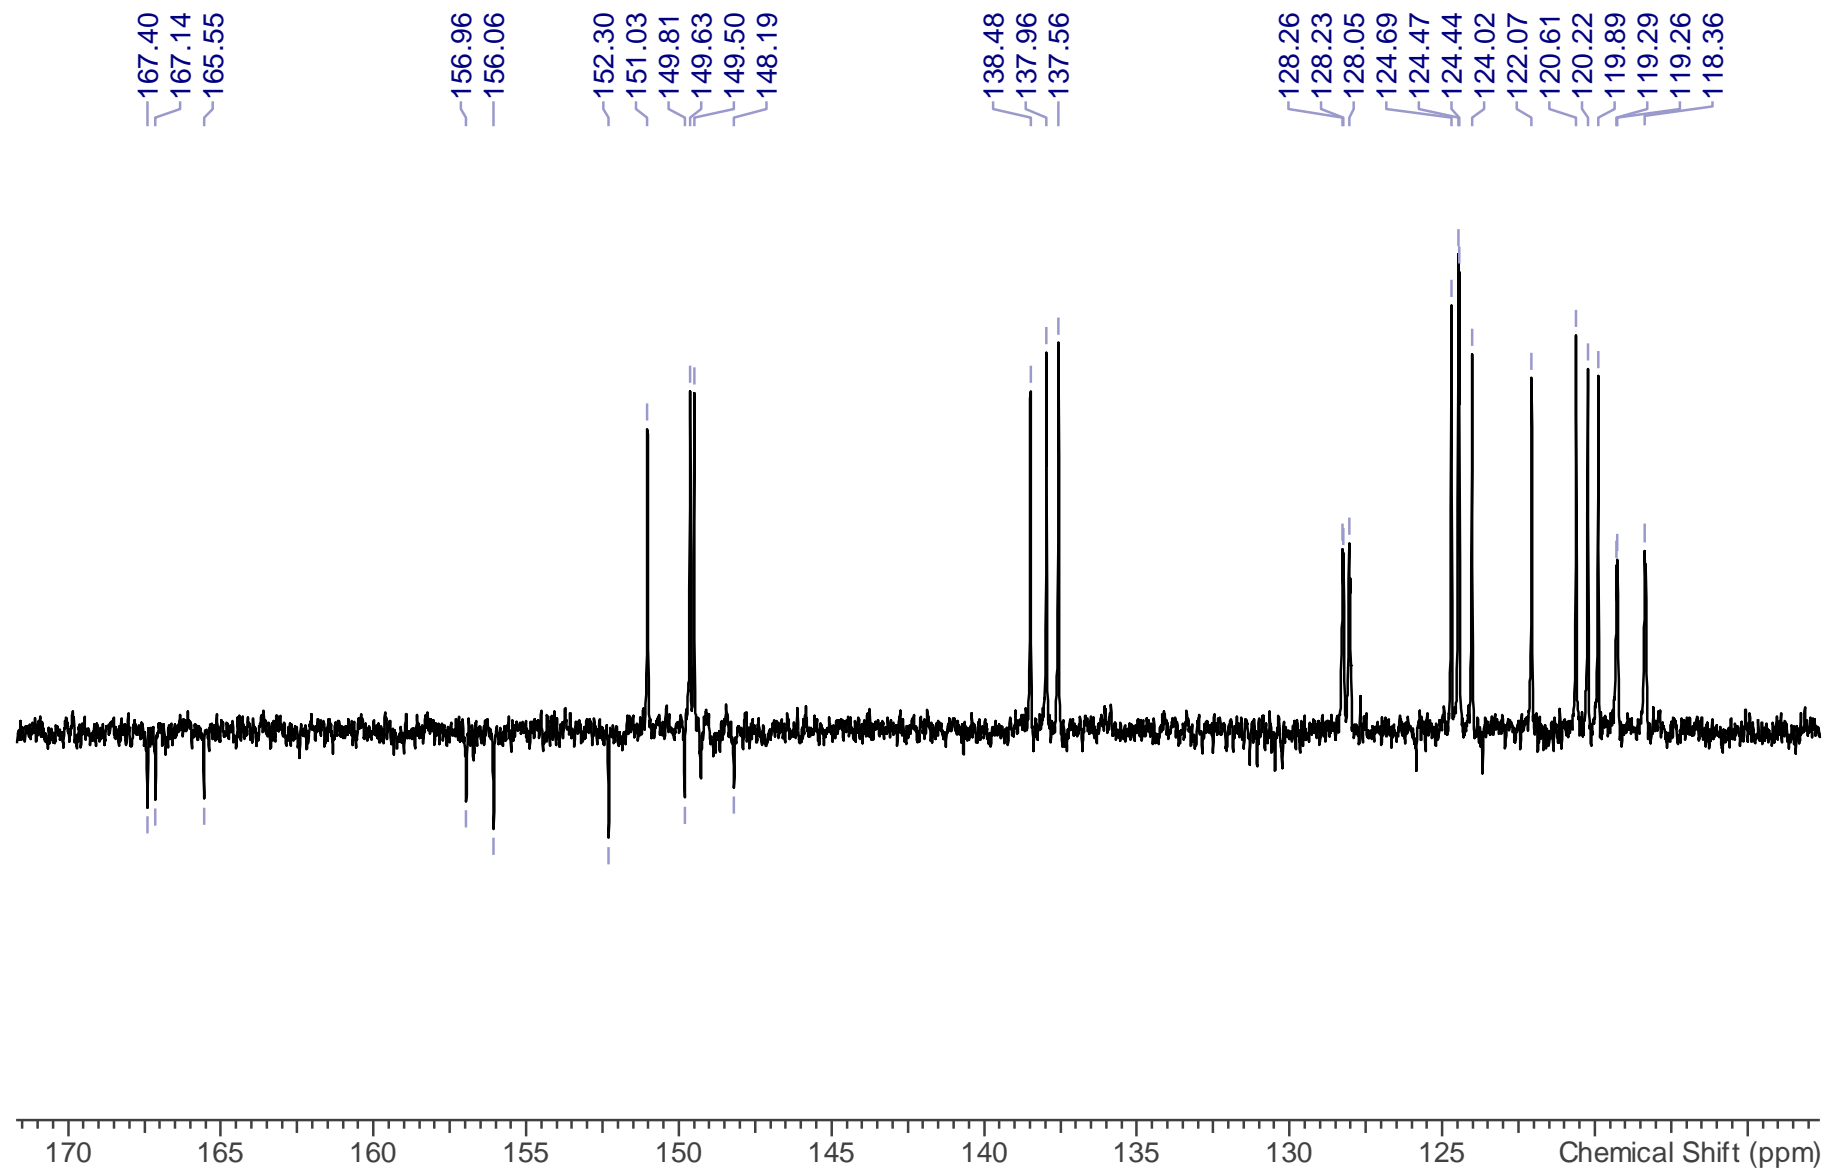



Section of the TOCSY spectrum of 3dL2

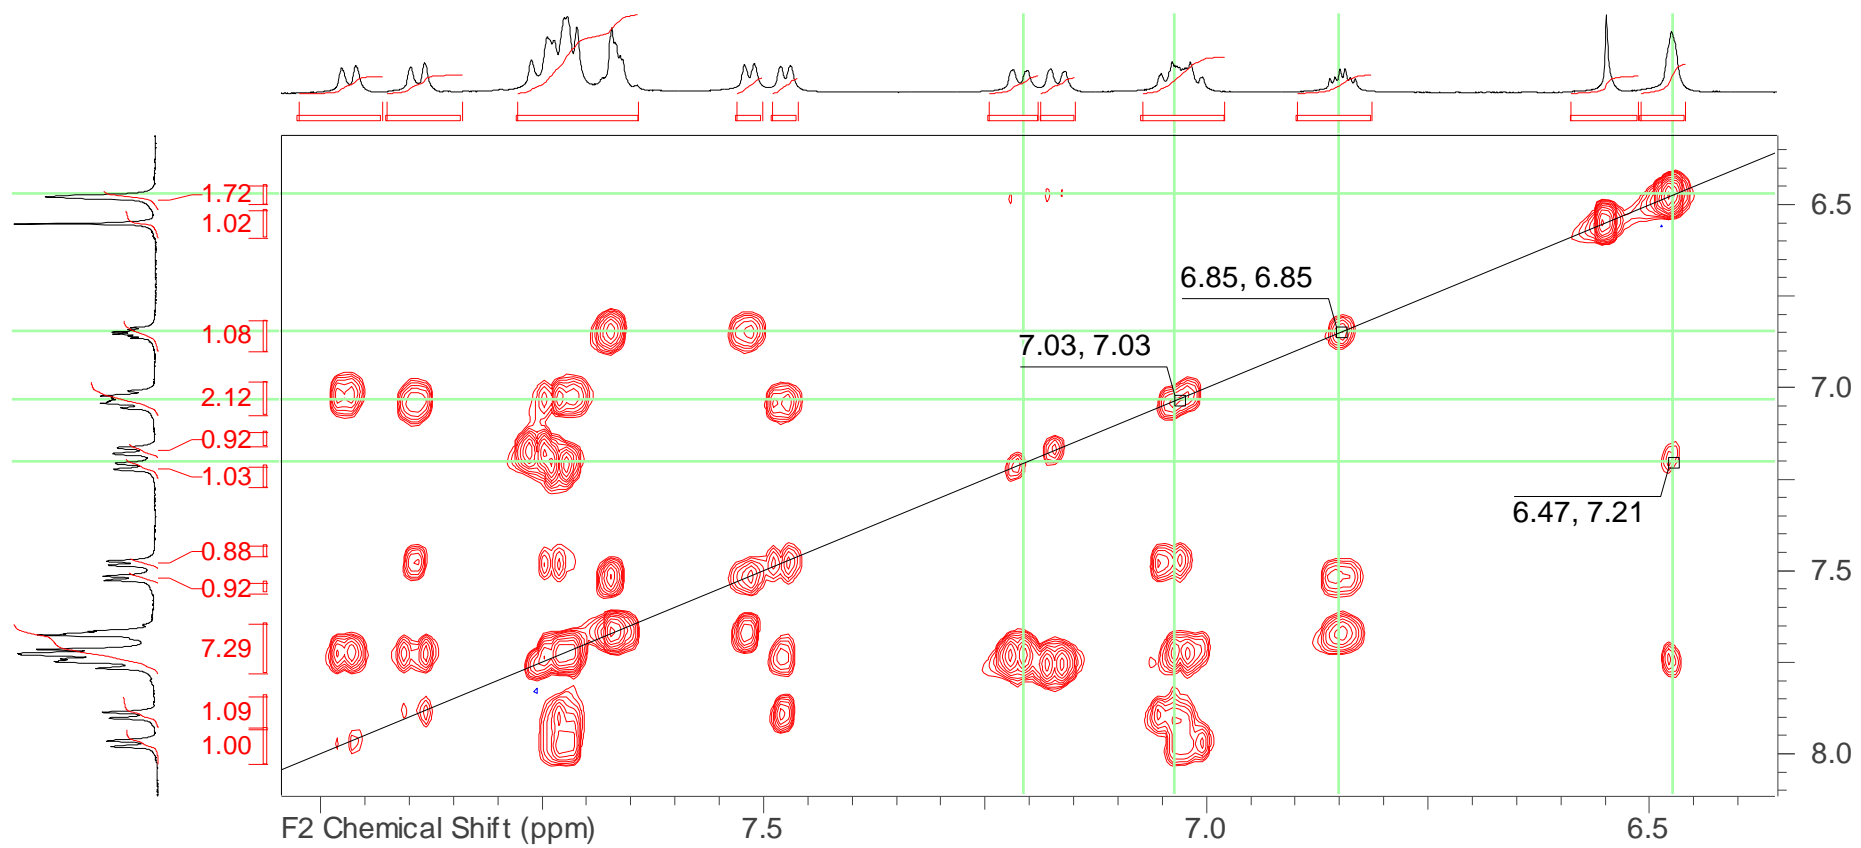

Section of the COSY spectrum of **3dL<sub>2</sub>**

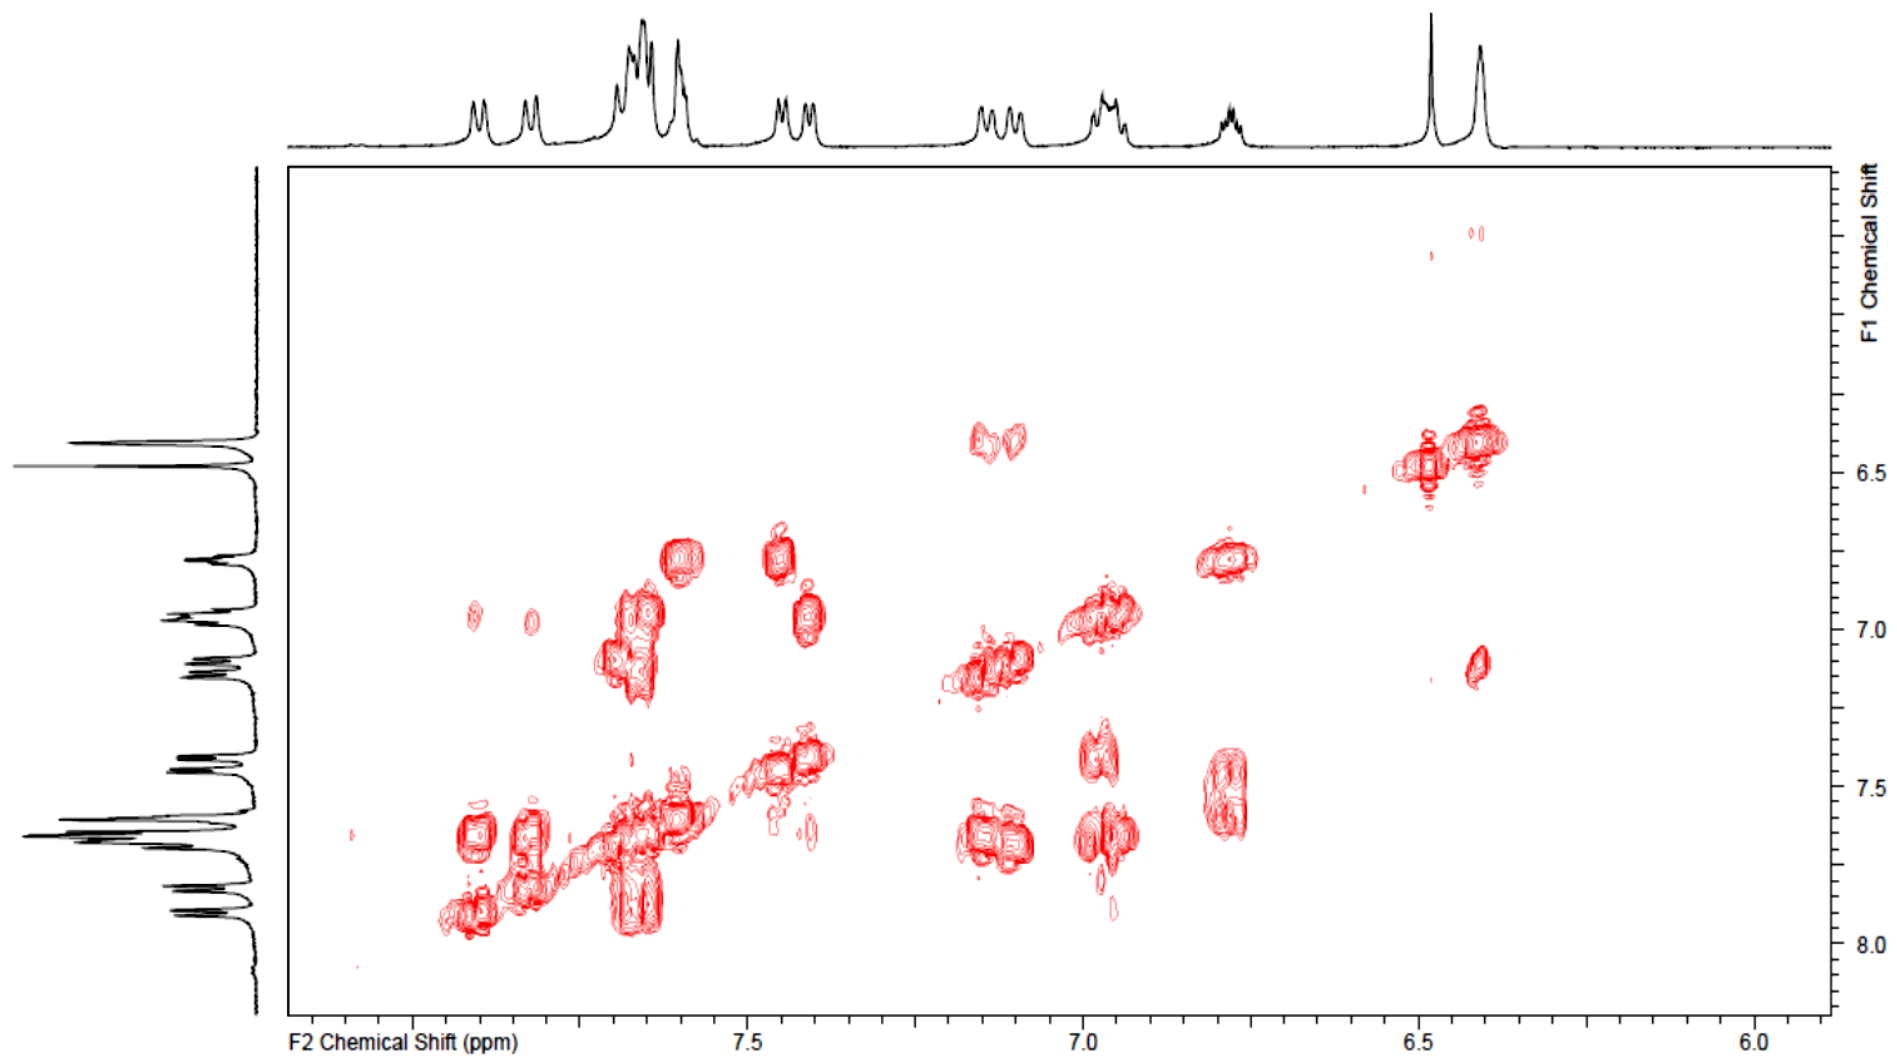

Section of the NOESY spectrum of **3dL2**

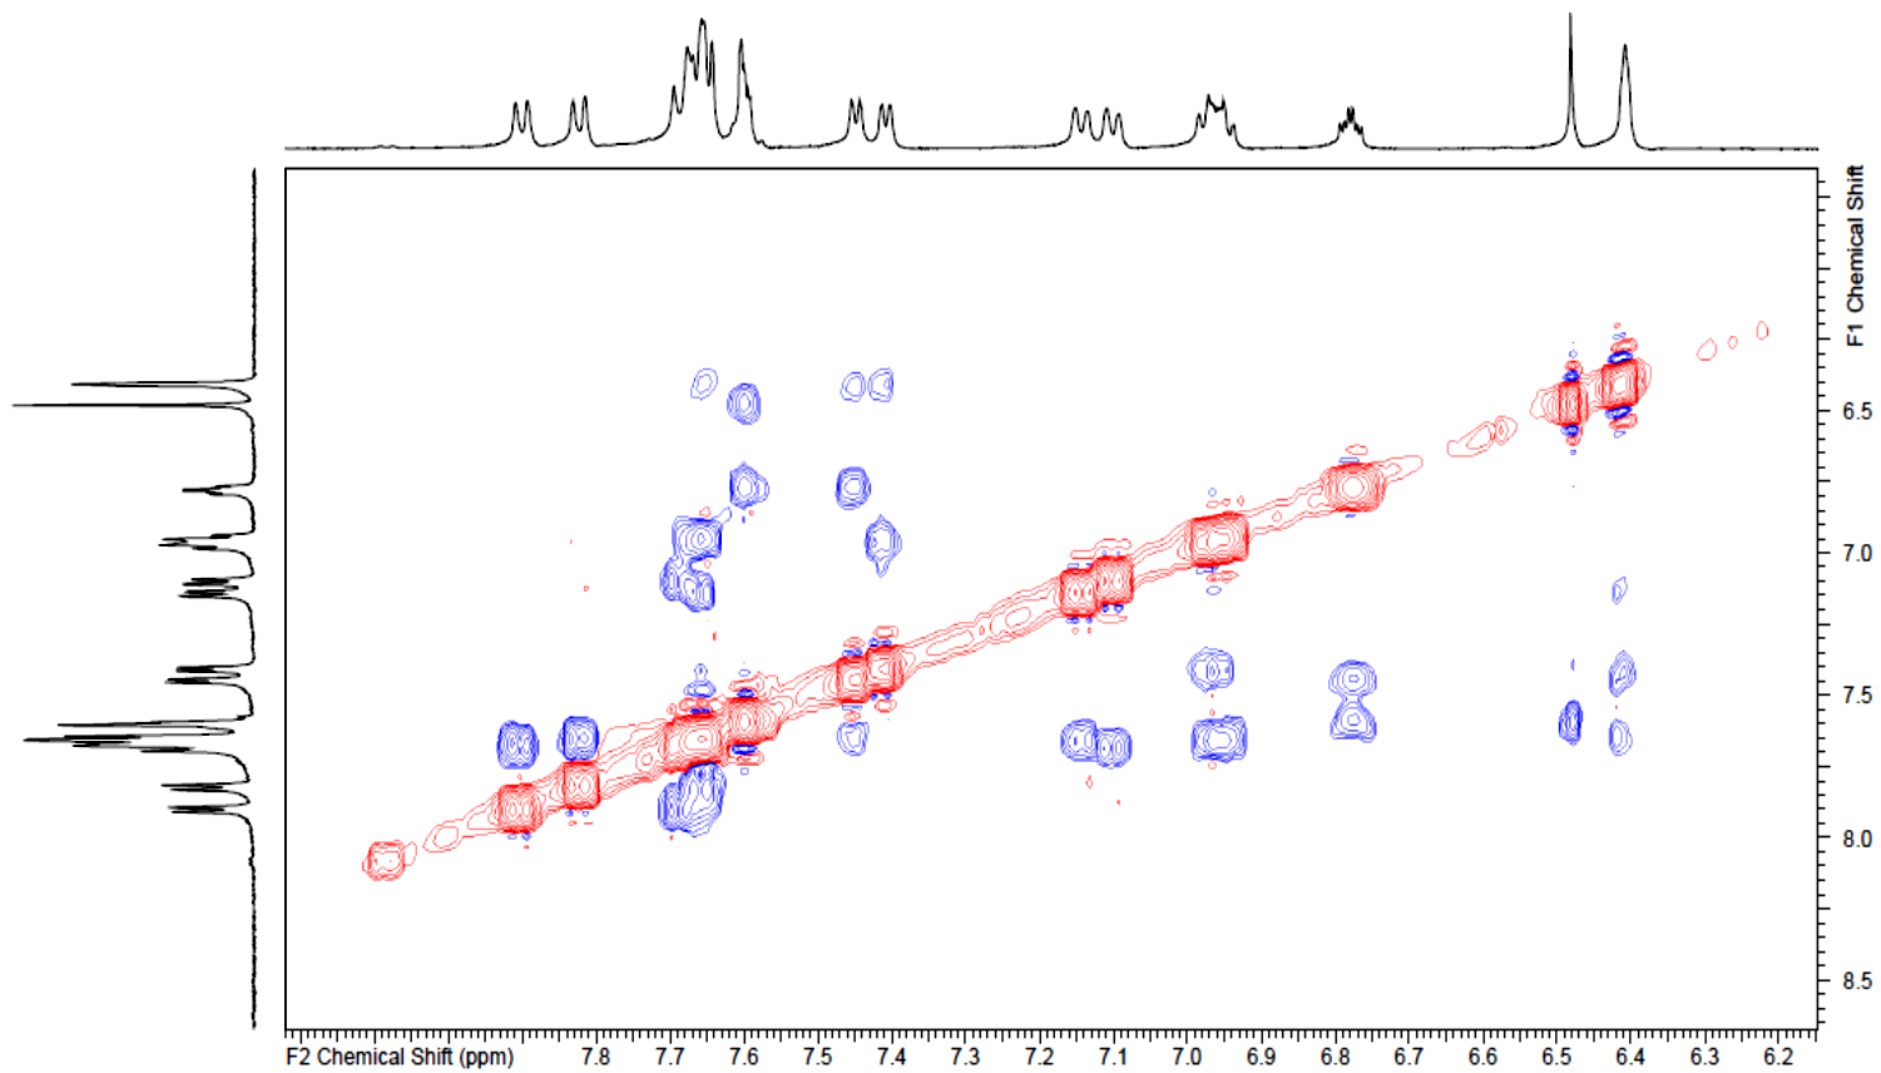

**<sup>19</sup>F NMR spectrum of 3**

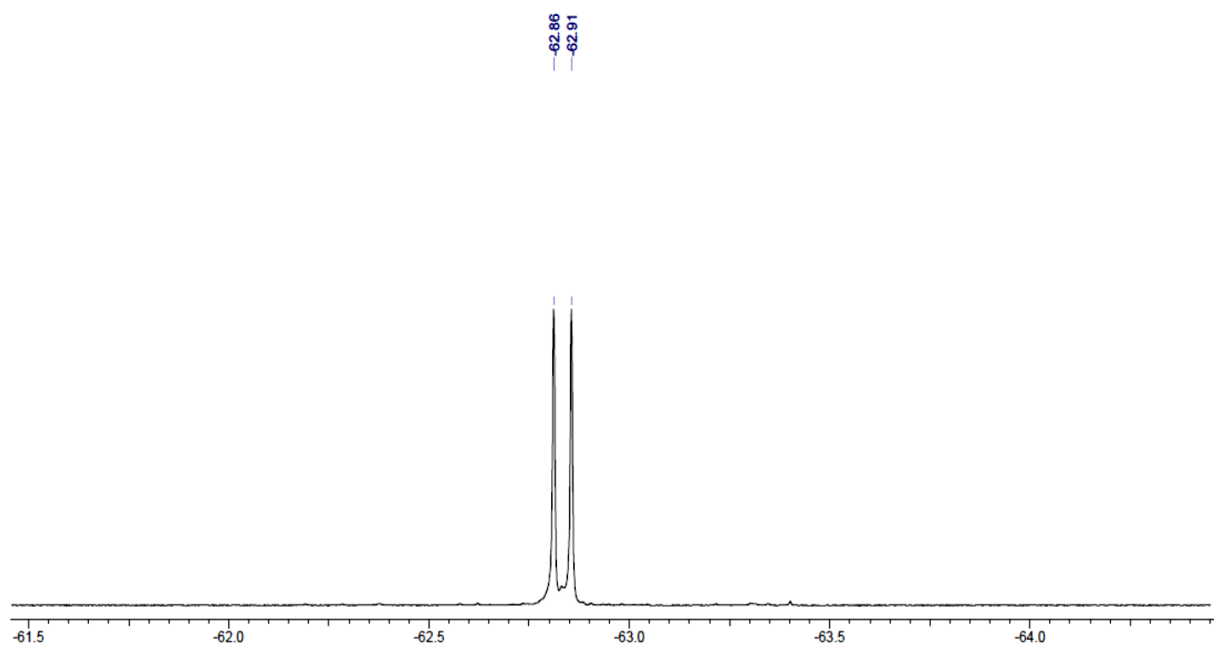

Supplement: d0dt02434a1.pdf [file d0dt02434a1.pdf]
